# Supplementary material for: Transcriptomic Analysis of Two Thioalkalivibrio Species Under Arsenite Stress Revealed a Potential Candidate Gene for an Alternative Arsenite Oxidation Pathway
Source: Front Microbiol. 2019 Jul 4;10:1514. doi: 10.3389/fmicb.2019.01514 (PMC6620896; doi:10.3389/fmicb.2019.01514)
Supplement: Supplementary file 2 [file Table_1.xlsx]

## Sheet: ARh2(T)(0.1mM vs. 0mM As(III)) 
Locus tag	P-value	q-value	b-value	Ste of b-value	Mean of obs	Var of obs	Tech var	Sigma sq	Smooth sigma sq	Final sigma sq	Protein product	Raw read counts
												ARh2(T) (0.1 mM As(III)) (1)	ARh2(T) (0.1 mM As(III)) (2)	ARh2(T) (0.1 mM As(III)) (3)	ARh2(T) (0 mM As(III)) (1)	ARh2(T) (0 mM As(III)) (2)	ARh2(T) (0 mM As(III)) (3)
G372_RS0108030	2.21347e-97	5.94759e-94	1.85095	0.0883841	6.77695	1.03676	0.00188554	0.00930232	0.00983209	0.00983209	cobalamin biosynthesis protein CobN	2520	2321	2561	359	249	339
G372_RS0102685	8.10765e-65	1.08926e-61	-2.04882	0.120513	5.1942	1.2695	0.00931358	0.00344011	0.0124716	0.0124716	hypothetical protein	81	61	74	384	446	533
G372_RS0108330	9.68414e-52	8.67376e-49	1.56403	0.103346	8.66139	0.744054	0.000217983	0.0125323	0.0158027	0.0158027	DMSO reductase	14488	11620	16512	2702	1980	2494
G372_RS0106410	1.39005e-49	9.33769e-47	-1.67572	0.113198	6.53011	0.857792	0.001942	0.0172786	0.00964793	0.0172786	site-specific integrase	394	260	350	1656	1217	1427
G372_RS0104320	5.6851e-43	3.05517e-40	-1.19964	0.0872974	6.50092	0.437909	0.00178882	0.00591715	0.00964243	0.00964243	hypothetical protein	446	319	472	1005	1001	1282
G372_RS0107950	1.38963e-35	6.22322e-33	-1.43742	0.115451	6.98579	0.635847	0.000963906	0.0190294	0.0101451	0.0190294	NADH dehydrogenase	773	475	549	2036	1818	2133
G372_RS0108045	2.77882e-35	1.06667e-32	1.56405	0.126184	4.94044	0.750964	0.00973295	0.0116225	0.0141505	0.0141505	cob(I)yrinic acid a,c-diamide adenosyltransferase	311	318	397	58	55	58
G372_RS0108335	4.15067e-35	1.39411e-32	1.48744	0.120315	8.50517	0.681111	0.000267736	0.0214457	0.0150784	0.0214457	4Fe-4S dicluster domain-containing protein	11602	9268	14423	2487	1698	2218
G372_RS0104325	1.56056e-28	4.65913e-26	-0.969009	0.087452	7.28797	0.290838	0.000645945	0.0107842	0.0108258	0.0108258	sensor domain-containing diguanylate cyclase	1106	821	1111	1814	1841	2899
G372_RS0108115	2.7597e-27	7.41532e-25	1.90709	0.176252	4.13771	1.10417	0.0260731	-0.00972747	0.0205239	0.0205239	hypothetical protein	185	186	171	23	16	26
G372_RS0106495	1.36898e-25	3.34405e-23	-1.33906	0.12806	5.10915	0.5576	0.00725309	0.0173461	0.0130015	0.0173461	hypothetical protein	87.9011	85.7797	109.545	237.903	246.786	414.732
G372_RS0108085	3.50626e-25	7.85111e-23	1.21832	0.117519	5.14752	0.457755	0.00796056	0.00762375	0.0127557	0.0127557	precorrin-2 C(20)-methyltransferase	329	340	389	87	77	87
G372_RS13620	2.87215e-24	5.93652e-22	-1.14732	0.112881	9.2606	0.407286	0.000111702	0.0153707	0.0190015	0.0190015	type I secretion C-terminal target domain-containing protein	8650	4943	6720	16796	14187	19740
G372_RS0110995	1.00521e-23	1.92928e-21	-1.21708	0.12121	7.95625	0.462018	0.000382134	0.0216556	0.012869	0.0216556	sodium-translocating pyrophosphatase hppA	1947	1260	2106	3992	4213	6203
G372_RS0112060	3.12821e-23	5.60366e-21	1.06141	0.106906	5.34332	0.344581	0.00542906	0.002822	0.0117141	0.0117141	nicotinate-nucleotide--dimethylbenzimidazole phosphoribosyltransferase	376	370	445	116	87	132
G372_RS13555	3.42924e-22	5.75899e-20	1.036	0.106949	6.58435	0.335713	0.00174921	0.0154079	0.00966964	0.0154079	ATP:cob(I)alamin adenosyltransferase	1426	1199	1447	439	351	375
G372_RS0108345	2.26715e-21	3.58343e-19	1.85026	0.194929	7.21608	1.07264	0.00107047	0.0559258	0.0106448	0.0559258	GTP 3',8-cyclase MoaA	4105	2984	4562	691	353	465
G372_RS0100715	3.52464e-21	5.2615e-19	-0.913337	0.0966917	7.34431	0.261474	0.000711879	0.013312	0.0109727	0.013312	adenylate kinase	1127	906	1272	1832	1996	2884
G372_RS0103065	4.10861e-20	5.81045e-18	0.796571	0.0867235	6.51282	0.194207	0.0016373	0.00317471	0.00964415	0.00964415	NADH-quinone oxidoreductase subunit J	1095	1033	1232	424	338	466
G372_RS0112705	1.10628e-19	1.48629e-17	0.789193	0.0869351	6.69329	0.19253	0.00159041	0.0055122	0.00974616	0.00974616	carboxysome peptide B	1554	1179	1293	531	387	565
G372_RS0106515	1.30006e-19	1.66345e-17	-1.01219	0.111717	5.15826	0.3121	0.00603218	-0.000108754	0.0126887	0.0126887	hypothetical protein	132	108	110	244	224	316
G372_RS0112080	1.75922e-19	2.14865e-17	0.902937	0.100023	5.62834	0.249966	0.0042296	0.00249211	0.0107772	0.0107772	PIN domain-containing protein	512	456	492	167	120	199
G372_RS0108020	2.35666e-19	2.75319e-17	0.842408	0.0936502	7.93136	0.220961	0.000374843	0.00970677	0.0127807	0.0127807	TonB-dependent receptor	4828	4440	4915	1816	1414	1716
G372_RS0108060	3.13645e-19	3.51152e-17	1.37417	0.153302	4.84184	0.594706	0.0106275	0.0246247	0.0148141	0.0246247	cobalt-precorrin-5B (C(1))-methyltransferase	227	286	338	60	50	61
G372_RS0106255	5.74571e-19	6.17549e-17	-0.795286	0.0893896	6.18198	0.193716	0.00216906	0.00279668	0.0098167	0.0098167	hypothetical protein	413	329	348	628	526	817
G372_RS0106335	7.23113e-19	7.47309e-17	-1.04795	0.118128	5.01027	0.333891	0.00726274	-0.00172289	0.0136687	0.0136687	hypothetical protein	95	91	110	234	192	260
G372_RS0105820	9.30607e-19	9.26127e-17	-0.788737	0.0891919	7.05881	0.196178	0.000850775	0.011082	0.0102865	0.011082	IMP dehydrogenase	1018	806	810	1423	1259	2073
G372_RS0108110	1.19782e-18	1.14948e-16	1.34953	0.153096	4.38542	0.570301	0.0168565	0.0130577	0.0183013	0.0183013	precorrin-4 C(11)-methyltransferase	178	156	193	39	37	33
G372_RS0112695	2.20689e-18	2.0448e-16	0.852624	0.0974852	8.24023	0.227105	0.000306558	0.0109623	0.0139485	0.0139485	carboxysome shell carbonic anhydrase	7956	5165	6577	2156	1722	2953
G372_RS0100155	3.92017e-18	3.51116e-16	-0.763113	0.0879053	6.29501	0.179482	0.00187827	0.00409651	0.00971274	0.00971274	hypothetical protein	498	334	419	710	572	889
G372_RS0107415	4.28322e-18	3.71259e-16	1.49063	0.17191	4.22353	0.677161	0.0246051	-0.0113972	0.0197244	0.0197244	glycine zipper 2TM domain-containing protein	163	135	185	30	27	29
G372_RS0101985	5.25421e-18	4.4119e-16	0.810032	0.09367	5.92928	0.198273	0.00301762	-0.00123254	0.0101435	0.0101435	TlpA family protein disulfide reductase	681	528	686	215	185	285
G372_RS0108775	2.10938e-17	1.71755e-15	0.737904	0.086939	6.50122	0.169674	0.00169511	0.00620899	0.00964247	0.00964247	cell envelope integrity protein TolA	1123	1005	1092	463	330	461
G372_RS0101200	2.74312e-17	2.16787e-15	0.733591	0.0867435	7.11337	0.165534	0.000883874	0.00422535	0.0104028	0.0104028	arginyltransferase	1996	1656	2326	797	633	883
G372_RS0103075	3.39163e-17	2.6038e-15	0.734849	0.0871478	7.16972	0.169415	0.000859983	0.00840758	0.0105321	0.0105321	NADH-quinone oxidoreductase subunit NuoH	2294	1792	2219	895	708	831
G372_RS0112050	4.60011e-17	3.43347e-15	0.99679	0.118715	5.90695	0.314989	0.00327478	0.0178651	0.0101773	0.0178651	cobyric acid synthase	761	584	687	248	159	203
G372_RS0104715	5.31106e-17	3.85698e-15	1.33622	0.159461	4.37952	0.554937	0.0197901	0.00432908	0.0183515	0.0183515	high potential iron-sulfur protein	173	163	183	31	28	55
G372_RS0106500	1.18777e-16	8.39879e-15	-1.99971	0.241384	3.31448	1.24722	0.0559508	0.00351343	0.0314488	0.0314488	DUF4160 domain-containing protein	17	8	9	60	65	76
G372_RS0100910	2.08948e-16	1.4396e-14	0.760468	0.09255	7.82441	0.178029	0.000435997	0.00523417	0.0124122	0.0124122	50S ribosomal protein L5	4254	3738	4251	1695	1245	1713
G372_RS0100915	2.27534e-16	1.52846e-14	0.735441	0.0896158	7.50046	0.170158	0.000642925	0.00922649	0.0114036	0.0114036	50S ribosomal protein L24	3105	2584	3070	1229	1008	1146
G372_RS0108605	2.59474e-16	1.70051e-14	1.31511	0.16056	5.70048	0.549792	0.0044251	0.034244	0.0105878	0.034244	hypothetical protein	633	610	686	124	158	136
G372_RS0105080	3.71966e-16	2.32435e-14	-0.734034	0.0900948	6.08727	0.171178	0.0022462	0.00967356	0.00992941	0.00992941	restriction endonuclease subunit S	356	333	329	602	512	601
G372_RS0108610	3.64259e-16	2.32435e-14	0.744432	0.0913426	6.11658	0.168778	0.00262274	0.000532101	0.00989247	0.00989247	hypothetical protein	756	651	797	264	256	325
G372_RS0106400	4.54241e-16	2.77397e-14	0.765773	0.0942705	5.8397	0.177202	0.00304142	-0.00144277	0.010289	0.010289	LysR family transcriptional regulator	581	492	617	218	174	244
G372_RS0108035	7.14734e-16	4.26776e-14	1.8387	0.227901	3.66573	1.06181	0.0519366	0.00751612	0.0259719	0.0259719	flagellar motor protein MotA	105	100	122	15	15	11
G372_RS0112070	1.0354e-15	6.04808e-14	0.749958	0.0934808	5.986	0.171914	0.00304511	0.000933249	0.0100629	0.0100629	adenosylcobinamide-GDP ribazoletransferase	651	543	756	248	206	288
G372_RS0103080	1.27728e-15	7.30221e-14	0.769079	0.0961738	8.05015	0.188544	0.000367783	0.0135063	0.0132113	0.0135063	NADH-quinone oxidoreductase subunit G	5840	4086	5649	2167	1660	1953
G372_RS0108175	2.75477e-15	1.5421e-13	0.71063	0.0899356	6.16332	0.157294	0.00229533	0.00494907	0.0098373	0.0098373	thioredoxin domain-containing protein	773	740	750	288	270	342
G372_RS0106360	3.15077e-15	1.72778e-13	-0.694627	0.0880972	7.36414	0.152109	0.000616161	0.00858006	0.0110255	0.0110255	sigma-54-dependent Fis family transcriptional regulator	1403	958	1424	2183	1656	2230
G372_RS0108080	3.57706e-15	1.92231e-13	1.45363	0.184731	4.82301	0.674865	0.0104087	0.0407795	0.014942	0.0407795	precorrin-8X methylmutase cobH	253	258	358	56	57	48
G372_RS0100930	1.31649e-14	6.93611e-13	0.694851	0.090191	6.21161	0.15174	0.00241577	0.00620229	0.00978586	0.00978586	50S ribosomal protein L29	839	704	820	359	261	336
G372_RS13580	2.20848e-14	1.14119e-12	-0.687674	0.0900349	6.15367	0.146116	0.00231114	0.00299766	0.00984828	0.00984828	helix-turn-helix transcriptional regulator	364	348	403	580	481	756
G372_RS0100920	2.91923e-14	1.47999e-12	0.711548	0.093602	6.86291	0.162404	0.00116524	0.0119768	0.00994417	0.0119768	50S ribosomal protein L14	1558	1462	1540	687	500	632
G372_RS0102510	3.16395e-14	1.57436e-12	-0.921625	0.121403	7.41348	0.272505	0.000658398	0.0214498	0.0111592	0.0214498	ubiquinol-cytochrome c reductase iron-sulfur subunit	1153	1255	1091	2126	1983	3117
G372_RS0106125	3.73873e-14	1.82654e-12	0.743105	0.0981674	5.99261	0.177226	0.00295123	0.011504	0.0100539	0.011504	OmpA family protein	782	488	707	276	205	268
G372_RS0107110	6.46514e-14	3.10211e-12	0.801996	0.106957	6.01309	0.206687	0.00277042	0.0143893	0.0100264	0.0143893	DJ-1 family protein	697	581	774	292	203	249
G372_RS0100380	6.96987e-14	3.28562e-12	-0.746617	0.0997026	7.84284	0.17916	0.000401278	0.0145096	0.0124745	0.0145096	RNA polymerase sigma factor RpoD	2033	1980	1850	3610	2510	4045
G372_RS0108065	1.01308e-13	4.69336e-12	1.36447	0.183416	5.04176	0.598899	0.00994661	0.0405155	0.0134526	0.0405155	ABC transporter ATP-binding protein	279	372	380	78	65	67
G372_RS0101630	1.22528e-13	5.58022e-12	1.10706	0.14932	4.37414	0.393638	0.0150473	0.0174051	0.0183974	0.0183974	hypothetical protein	163	171	129	42	36	44
G372_RS0100015	1.3729e-13	6.14831e-12	-0.863223	0.116669	5.18576	0.23988	0.00566327	0.0147541	0.0125216	0.0147541	hypothetical protein	140	112	136	303	202	245
G372_RS0108120	1.82856e-13	8.05465e-12	1.39521	0.189547	4.11783	0.627098	0.0259032	0.0279889	0.0207165	0.0279889	hypothetical protein	137	144	130	23	19	45
G372_RS0106250	2.01534e-13	8.73421e-12	-1.03907	0.141412	4.4145	0.332769	0.0119407	-0.000851533	0.0180555	0.0180555	hypothetical protein	60	52	51	137	96	146
G372_RS0108075	3.7696e-13	1.60776e-11	1.61225	0.221963	4.51538	0.838927	0.0163888	0.0575128	0.0172273	0.0575128	precorrin-3B synthase	208	195	290	27	45	39
G372_RS0102465	4.04196e-13	1.69699e-11	0.886506	0.122207	5.61343	0.253689	0.00446832	0.0179334	0.0108174	0.0179334	transcriptional regulator MraZ	485	401	551	144	115	236
G372_RS0112260	4.10641e-13	1.69753e-11	-1.04331	0.143865	5.63959	0.351384	0.00335351	0.0276921	0.0107472	0.0276921	carbon storage regulator	180	164	216	443	438	396
G372_RS0108050	5.07723e-13	2.06705e-11	1.35549	0.187658	5.41361	0.593468	0.00609424	0.0467291	0.0114372	0.0467291	cobyrinate a,c-diamide synthase	409	497	585	125	89	95
G372_RS0110985	8.57307e-13	3.43818e-11	-1.04487	0.146101	6.52103	0.353138	0.00149812	0.0305202	0.00964576	0.0305202	DeoR family transcriptional regulator	545	303	545	899	861	1403
G372_RS0110540	1.1792e-12	4.65957e-11	-0.66019	0.0928826	6.21747	0.141108	0.00230135	0.0106394	0.00978004	0.0106394	DNA-binding response regulator	449	312	460	668	568	646
G372_RS0108510	1.38506e-12	5.39371e-11	-1.18421	0.16713	3.99512	0.443123	0.0199266	0.00809765	0.0219721	0.0219721	hypothetical protein	33	24	45	90	67	112
G372_RS0108340	2.26632e-12	8.69942e-11	1.0158	0.144762	10.9015	0.332364	2.18135e-05	0.0284901	0.0314122	0.0314122	formate dehydrogenase	100642	84422	119205	25755	21691	45090
G372_RS0100900	3.13939e-12	1.1881e-10	0.618469	0.0887159	7.3846	0.12317	0.000725211	0.00979855	0.0110806	0.0110806	30S ribosomal protein S8	2532	2129	2708	1205	900	1102
G372_RS0104115	3.29254e-12	1.22876e-10	1.59622	0.229189	6.58632	0.827406	0.00198038	0.076811	0.00967066	0.076811	cytochrome c	1495	1803	2140	406	242	255
G372_RS0112355	3.83726e-12	1.41243e-10	-0.828966	0.119395	7.61815	0.223262	0.000542257	0.0208405	0.0117517	0.0208405	peptidase M23	1662	1489	1355	2482	2186	3895
G372_RS0110545	6.42701e-12	2.3337e-10	-0.628828	0.0915345	7.73089	0.126342	0.000463162	0.0091793	0.0121047	0.0121047	HlyD family type I secretion periplasmic adaptor subunit	2180	1408	2069	3004	2325	3143
G372_RS0103085	1.00227e-11	3.59082e-10	0.706948	0.103869	7.74356	0.162879	0.000488094	0.0156949	0.0121456	0.0156949	NADH-quinone oxidoreductase subunit F	4182	2972	3938	1677	1263	1451
G372_RS0107820	1.02402e-11	3.62045e-10	0.584698	0.0859461	6.58315	0.105466	0.00141107	0.00221986	0.00966902	0.00966902	Na+/H+ antiporter subunit D	1215	943	1093	511	378	587
G372_RS0100935	1.20049e-11	4.18924e-10	0.60853	0.0897516	7.0518	0.120759	0.00103504	0.011048	0.0102723	0.011048	50S ribosomal protein L16	1724	1762	1744	834	620	864
G372_RS0112700	1.67719e-11	5.77772e-10	0.593908	0.0882259	6.36823	0.113779	0.00200786	0.00794343	0.00966786	0.00966786	carboxysome peptide A	941	729	971	421	350	398
G372_RS0109095	2.11787e-11	7.20344e-10	0.581125	0.0867654	6.9981	0.107339	0.00112457	0.0064098	0.0101678	0.0101678	protein translocase subunit SecF	2003	1393	1551	717	614	900
G372_RS0103060	2.64957e-11	8.89923e-10	0.713568	0.107065	6.10301	0.166509	0.00228906	0.0149052	0.00990936	0.0149052	NADH-quinone oxidoreductase subunit NuoK	662	745	729	302	230	318
G372_RS0108100	3.3592e-11	1.10075e-09	1.50848	0.227527	4.25707	0.744775	0.0222278	0.0554249	0.0194221	0.0554249	bifunctional cobalt-precorrin-7 (C(5))-methyltransferase/cobalt-precorrin-6B (C(15))-methyltransferase	173	140	191	24	39	27
G372_RS0109375	3.34118e-11	1.10075e-09	-1.1126	0.167795	7.02307	0.40515	0.00096073	0.0412722	0.0102153	0.0412722	peroxiredoxin	653	848	663	1574	1449	2378
G372_RS13980	3.76558e-11	1.21905e-09	0.698254	0.105588	5.41253	0.156287	0.00528205	0.00724205	0.0114411	0.0114411	BrnT family toxin	356	339	366	132	109	197
G372_RS0111000	6.47855e-11	2.07237e-09	-0.728363	0.111502	5.2415	0.170542	0.00644508	0.00779074	0.0122041	0.0122041	HIT family protein	144	148	145	241	186	323
G372_RS0103090	6.93354e-11	2.19181e-09	0.706515	0.108327	7.00127	0.163831	0.000980031	0.0166219	0.0101737	0.0166219	NAD(P)H-dependent oxidoreductase subunit E	1912	1418	1945	778	631	675
G372_RS0110975	8.82802e-11	2.75824e-09	-1.10179	0.169878	4.69895	0.398811	0.00976576	0.0335219	0.0158192	0.0335219	phosphoribosyltransferase	70	67	73	137	129	281
G372_RS0108070	9.54359e-11	2.94754e-09	1.4269	0.220405	4.05455	0.66911	0.0233497	0.0495178	0.0213494	0.0495178	ABC transporter permease	104	137	156	26	27	22
G372_RS0110980	1.52668e-10	4.66158e-09	-1.08743	0.16984	5.09044	0.389365	0.00696481	0.0363034	0.0131247	0.0363034	hypothetical protein	139	76	108	209	196	385
G372_RS0101640	1.60218e-10	4.83716e-09	0.706002	0.110394	5.24492	0.158224	0.00609448	0.00477102	0.0121857	0.0121857	sensor histidine kinase	307	269	327	132	86	149
G372_RS0108055	1.69479e-10	5.05989e-09	1.63419	0.255873	4.83149	0.879737	0.0105476	0.0876588	0.0148842	0.0876588	uroporphyrinogen-III C-methyltransferase	244	312	413	61	49	40
G372_RS0104600	1.82549e-10	5.3902e-09	-0.54885	0.0860893	6.50947	0.094987	0.00147347	0.00429682	0.0096436	0.0096436	hypothetical protein	570	478	672	767	710	915
G372_RS0107730	2.28785e-10	6.68203e-09	3.40871	0.537595	3.85692	3.8326	0.104498	0.329015	0.023532	0.329015	hypothetical protein	269	270.83	332	9	2	20
G372_RS0112450	2.65277e-10	7.6645e-09	-0.55573	0.0879623	7.04042	0.101936	0.000896239	0.0107098	0.0102494	0.0107098	GGDEF domain-containing protein	972	792	1159	1183	1205	1738
G372_RS0100895	3.55966e-10	1.00682e-08	0.598768	0.0954637	7.68226	0.118493	0.000500005	0.01317	0.0119501	0.01317	50S ribosomal protein L6	3094	2884	3880	1610	1199	1558
G372_RS0112045	3.54824e-10	1.00682e-08	0.767543	0.122362	4.88606	0.182307	0.0079398	-0.000977455	0.014519	0.014519	threonine-phosphate decarboxylase	222	189	240	90	66	88
G372_RS0100870	3.81867e-10	1.06883e-08	0.605944	0.0967767	8.19668	0.117217	0.000274323	0.00855917	0.0137743	0.0137743	preprotein translocase subunit SecY	5135	5299	6020	2464	1952	2896
G372_RS0108090	4.08061e-10	1.13037e-08	0.809903	0.129566	4.68577	0.21271	0.0092648	0.0106443	0.015916	0.015916	precorrin-3B C(17)-methyltransferase	178	148	223	54	62	80
G372_RS0113165	4.17224e-10	1.14396e-08	0.53742	0.0860224	6.61425	0.0884495	0.00141321	0.000840996	0.00968657	0.00968657	flagellar basal body P-ring protein FlgI	1116	921	1246	502	435	612
G372_RS0100820	4.4328e-10	1.20313e-08	0.564667	0.0905209	6.09689	0.0999804	0.00237394	0.00303339	0.00991711	0.00991711	molecular chaperone DnaJ	751	591	636	314	236	366
G372_RS0110510	4.91556e-10	1.29491e-08	0.543961	0.0874286	6.43248	0.0888426	0.00181985	-0.00172669	0.00964578	0.00964578	acetolactate synthase large subunit	986	782	972	421	355	513
G372_RS0110795	4.89162e-10	1.29491e-08	-0.597497	0.0960214	5.69111	0.115231	0.00321811	0.00694498	0.0106121	0.0106121	diguanylate cyclase response regulator	293	216	230	337	334	408
G372_RS13960	4.83449e-10	1.29491e-08	0.827693	0.132976	9.2868	0.226742	9.98508e-05	0.026424	0.0191571	0.026424	6S RNA ssrS	18134	14003	23685	7520	5039	6940
G372_RS13520	5.0978e-10	1.32988e-08	-0.61066	0.098239	5.86196	0.123453	0.00312638	0.01135	0.0102502	0.01135	hypothetical protein	316	287	263	468	352	475
G372_RS0103400	5.49654e-10	1.42011e-08	0.61204	0.0986488	5.62665	0.117838	0.00381566	0.00300994	0.0107817	0.0107817	CDP-diacylglycerol--serine O-phosphatidyltransferase	460	384	418	191	165	195
G372_RS0101635	5.57484e-10	1.42663e-08	0.638216	0.102905	5.35555	0.125565	0.00422119	-9.32738e-06	0.0116629	0.0116629	DNA-binding response regulator	344	296	334	144	121	150
G372_RS0109460	6.39036e-10	1.6199e-08	-0.564659	0.0913615	6.73071	0.105668	0.00129427	0.0112261	0.00978173	0.0112261	cytochrome c	703	652	758	840	896	1317
G372_RS0106355	8.11597e-10	2.03809e-08	-0.526432	0.0857013	6.75949	0.0848361	0.00120483	0.000916075	0.00981224	0.00981224	hypothetical protein	839	606	789	1034	821	1202
G372_RS0109875	9.41518e-10	2.34246e-08	-0.531652	0.0868852	7.1236	0.0938551	0.00082322	0.0105003	0.0104255	0.0105003	HAMP domain-containing protein	978	1016	1195	1517	1245	1624
G372_RS0110525	9.87967e-10	2.43547e-08	0.727742	0.11908	7.61721	0.175899	0.000587198	0.020683	0.0117489	0.020683	cytochrome c biogenesis protein ResB	3670	3102	3036	1525	994	1345
G372_RS0104530	1.01687e-09	2.48394e-08	0.903424	0.147939	7.93127	0.271116	0.000413831	0.032415	0.0127804	0.032415	thiosulfohydrolase SoxB	4140	5232	5329	1394	1509	1911
G372_RS0108040	1.0669e-09	2.58267e-08	1.62071	0.265731	3.09639	0.844326	0.0703008	9.2987e-05	0.0356187	0.0356187	DUF2149 domain-containing protein	40	58	71	7	7	12
G372_RS0100925	1.14375e-09	2.74399e-08	0.714243	0.117321	7.18369	0.16956	0.000834641	0.0198117	0.0105656	0.0198117	30S ribosomal protein S17	2143	1727	2492	967	716	818
G372_RS0110600	1.18322e-09	2.81354e-08	0.544224	0.0894737	7.37178	0.0984606	0.000645031	0.0113633	0.011046	0.0113633	Fe-S cluster assembly transcriptional regulator IscR	2762	1956	2326	1190	792	1364
G372_RS0106210	1.22278e-09	2.88211e-08	0.534315	0.0879209	7.30219	0.0915368	0.000732626	0.00662852	0.0108625	0.0108625	ribosomal subunit interface protein	2105	2032	2349	1025	791	1306
G372_RS14050	1.78664e-09	4.17452e-08	-1.20314	0.199987	8.53804	0.482259	0.000218315	0.0597738	0.0152272	0.0597738	hypothetical protein	4308	1856	3781	9245	6589	9608
G372_RS0110520	2.00361e-09	4.64112e-08	0.566979	0.0945356	8.00324	0.101615	0.000366921	0.00610234	0.0130385	0.0130385	c-type cytochrome biogenesis protein CcsB	4666	3853	4810	2222	1730	2150
G372_RS0101080	2.06803e-09	4.74941e-08	-0.558178	0.0931481	5.99153	0.103881	0.00242352	0.0105913	0.0100554	0.0105913	elongation factor P	352	326	332	421	387	655
G372_RS0109465	2.11618e-09	4.81879e-08	-0.587009	0.0980206	7.55682	0.114904	0.000552973	0.0138591	0.0115677	0.0138591	cytochrome c	1601	1302	1924	2397	2140	2384
G372_RS0104390	2.27989e-09	5.14796e-08	-0.513964	0.0859975	6.51034	0.084313	0.00144963	0.00488205	0.00964374	0.00964374	citrate synthase	643	551	546	801	649	912
G372_RS0107980	2.34337e-09	5.24719e-08	0.665557	0.111446	5.50584	0.147794	0.0044555	0.0141748	0.0111273	0.0141748	5-formyltetrahydrofolate cyclo-ligase	369	379	398	171	145	159
G372_RS0110515	3.31018e-09	7.35079e-08	0.625502	0.105741	7.33358	0.130793	0.000707406	0.0160643	0.0109444	0.0160643	thiol:disulfide interchange protein DsbA/DsbL	2558	1822	2716	1185	798	1073
G372_RS0101500	4.24014e-09	9.33874e-08	0.538922	0.0917385	6.01332	0.0960574	0.00259787	0.00856016	0.0100261	0.0100261	23S rRNA (guanosine(2251)-2'-O)-methyltransferase RlmB	653	478	677	306	248	289
G372_RS0109925	5.14402e-09	1.12374e-07	0.864399	0.147952	5.481	0.250424	0.00473278	0.0281018	0.0112058	0.0281018	hypothetical protein	422	382	432	107	119	213
G372_RS0101340	5.23203e-09	1.1301e-07	0.595519	0.101979	5.55487	0.110931	0.00461872	0.00105449	0.0109809	0.0109809	glycosyltransferase family 2 protein	426	339	402	192	137	193
G372_RS0106330	5.25727e-09	1.1301e-07	-1.00583	0.172265	3.99261	0.339116	0.0215074	0.0230056	0.021999	0.0230056	ABC transporter ATP-binding protein	29	32	50	88	60	97
G372_RS0104125	5.70812e-09	1.21728e-07	0.560086	0.0961506	5.72972	0.0974351	0.00335182	0.000805926	0.0105156	0.0105156	class I SAM-dependent methyltransferase	470	410	483	225	163	247
G372_RS0105170	5.75785e-09	1.21822e-07	0.520977	0.089459	6.1892	0.0835777	0.00219539	0.000495313	0.00980897	0.00980897	carbon storage regulator	789	637	694	344	275	404
G372_RS0112675	5.92907e-09	1.24464e-07	0.500984	0.0860982	6.69189	0.0835348	0.00137444	0.00892478	0.00974492	0.00974492	acriflavine resistance protein B	1273	1026	1172	645	418	661
G372_RS0100890	6.11793e-09	1.27433e-07	0.507911	0.0873674	6.3971	0.083161	0.00179379	0.00541748	0.00965581	0.00965581	50S ribosomal protein L18	815	816	960	414	342	514
G372_RS0103045	7.30827e-09	1.51056e-07	0.776929	0.134331	6.96538	0.20274	0.00109946	0.0259679	0.0101085	0.0259679	NADH-quinone oxidoreductase subunit NuoN	1585	1694	1960	725	587	629
G372_RS0106120	7.80225e-09	1.60036e-07	0.540565	0.093642	7.9336	0.0971814	0.00036465	0.0115331	0.0127886	0.0127886	dihydrolipoyl dehydrogenase	4780	3134	4502	2121	1600	2056
G372_RS0101980	1.02065e-08	2.07764e-07	0.668648	0.116748	7.07311	0.150483	0.000868473	0.0195768	0.0103162	0.0195768	protein-disulfide reductase DsbD	1652	1791	2089	684	610	1043
G372_RS0107835	1.04651e-08	2.11426e-07	0.753355	0.131636	5.5069	0.191057	0.00475949	0.0212326	0.011124	0.0212326	Na+/H+ antiporter subunit G	527	314	385	178	118	165
G372_RS0101045	1.06238e-08	2.13032e-07	-0.600812	0.105029	5.48784	0.12153	0.00456925	0.0119773	0.0111839	0.0119773	3-oxoacyl-ACP reductase FabG	222	200	177	284	231	382
G372_RS0109660	1.15586e-08	2.30059e-07	-0.631481	0.110668	5.47659	0.134327	0.00426264	0.0141083	0.0112201	0.0141083	DUF2322 domain-containing protein	197	186	198	267	222	428
G372_RS0104095	1.44023e-08	2.84552e-07	0.664891	0.117295	6.18667	0.149134	0.00207933	0.0185579	0.00981167	0.0185579	type 1 glutamine amidotransferase	808	630	844	356	288	298
G372_RS0103550	2.70452e-08	5.30441e-07	-0.551805	0.0992532	8.38257	0.0932993	0.000236373	0.00220466	0.0145404	0.0145404	transketolase	3892	3476	3724	5136	4336	6205
G372_RS0107020	2.80411e-08	5.4599e-07	0.482341	0.0868575	7.1318	0.0711345	0.000872307	0.000800891	0.010444	0.010444	nitrogen regulatory protein P-II	1919	1494	1944	923	732	1016
G372_RS0103040	2.99058e-08	5.78107e-07	0.84531	0.152528	5.85434	0.242283	0.00325837	0.031639	0.0102632	0.031639	DUF2818 domain-containing protein	551	604	624	239	187	192
G372_RS0112530	3.17728e-08	6.09812e-07	0.526504	0.095185	5.99219	0.0940342	0.00273295	0.0108573	0.0100545	0.0108573	Fe-S protein assembly chaperone HscA	729	458	583	301	233	299
G372_RS0108245	3.31355e-08	6.31454e-07	0.476933	0.0863382	6.55471	0.0693158	0.00152542	-0.000179983	0.00965601	0.00965601	nitrogen fixation protein FixH	1049	894	1043	514	417	571
G372_RS0105085	3.36653e-08	6.37032e-07	-0.473518	0.0857633	6.73948	0.0687929	0.00124229	0.000666571	0.00979073	0.00979073	type I restriction-modification protein subunit M	817	615	814	1000	782	1135
G372_RS0100160	3.56609e-08	6.70077e-07	-0.576332	0.104577	8.75043	0.111076	0.000169173	0.0141161	0.0162353	0.0162353	hypothetical protein	6299	4036.5	5759	8147.72	6753.55	7855.66
G372_RS0101680	4.53151e-08	8.45567e-07	-0.806161	0.147412	6.52083	0.221045	0.00164017	0.0309551	0.00964571	0.0309551	NAD(P) transhydrogenase subunit alpha	556	525	441	840	680	1328
G372_RS0112055	4.72458e-08	8.75513e-07	0.9247	0.169316	4.18865	0.290923	0.0191832	0.0238188	0.0200434	0.0238188	bifunctional adenosylcobinamide kinase/adenosylcobinamide-phosphate guanylyltransferase	134	98	119	39	40	32
G372_RS0108540	4.90167e-08	9.02109e-07	-0.530411	0.0972367	5.72966	0.0856882	0.00366675	-0.00205742	0.0105157	0.0105157	Ni/Fe hydrogenase subunit alpha	285	218	291	368	306	414
G372_RS0112520	4.95795e-08	9.06258e-07	0.70436	0.129174	6.07752	0.16886	0.00311806	0.0219108	0.00994205	0.0219108	iron-sulfur cluster assembly protein IscA	698	687	685	339	211	290
G372_RS0105430	5.24683e-08	9.52582e-07	-0.469062	0.0861813	6.99722	0.0670244	0.000974675	0.000298676	0.0101661	0.0101661	polysaccharide biosynthesis protein	1060	848	993	1238	1001	1542
G372_RS0104700	5.44386e-08	9.81721e-07	0.46542	0.0856155	6.62654	0.0705198	0.00130059	0.00561817	0.00969443	0.00969443	bifunctional diguanylate cyclase/phosphodiesterase	1033	1043	1107	515	458	655
G372_RS0112065	5.63151e-08	1.00879e-06	0.710675	0.130876	4.70958	0.167431	0.00995122	0.0099401	0.0157417	0.0157417	histidine phosphatase family protein	187	153	190	85	57	69
G372_RS0100810	6.07295e-08	1.08066e-06	0.703379	0.129855	6.38028	0.168657	0.001774	0.0235195	0.00966242	0.0235195	nucleotide exchange factor GrpE	1053	818	945	459	252	446
G372_RS0109605	7.45359e-08	1.31762e-06	0.687352	0.127764	4.80432	0.14948	0.00941502	0.00026478	0.0150703	0.0150703	hypothetical protein	197	172	206	84	56	98
G372_RS0105525	8.05651e-08	1.41489e-06	0.48783	0.0909137	6.11096	0.0765569	0.00249853	0.00395583	0.00989942	0.00989942	glutathione amide-dependent peroxidase	733	570	628	298	296	360
G372_RS0102165	8.28517e-08	1.4456e-06	0.508923	0.0949341	5.7518	0.0874543	0.00305401	0.00913766	0.0104647	0.0104647	ferritin	566	360	452	231	167	271
G372_RS0104475	8.4977e-08	1.47312e-06	0.550435	0.102765	6.80818	0.103566	0.00114665	0.0146944	0.00987005	0.0146944	sigma-54-dependent Fis family transcriptional regulator	1652	1179	1200	561	515	812
G372_RS0100885	1.01395e-07	1.74647e-06	0.480324	0.0902151	7.60301	0.0762424	0.000502346	0.00828417	0.0117058	0.0117058	30S ribosomal protein S5	2635	2679	3237	1412	1209	1659
G372_RS0104555	1.11153e-07	1.90235e-06	-0.455783	0.0858756	6.98652	0.0655359	0.000915502	0.00310279	0.0101464	0.0101464	class I SAM-dependent DNA methyltransferase	950	840	1105	1232	1048	1405
G372_RS0110990	1.12561e-07	1.91424e-06	-0.930714	0.175435	6.42118	0.296801	0.00172612	0.04444	0.0096484	0.04444	hypothetical protein	581	288	473	785	667	1295
G372_RS0109930	1.20125e-07	2.03003e-06	0.456431	0.0862279	7.0165	0.0690494	0.000950297	0.00723798	0.0102026	0.0102026	hypothetical protein	1511	1456	1724	717	720	978
G372_RS0112075	1.46716e-07	2.46392e-06	0.6607	0.125689	4.84442	0.137313	0.00889978	-0.00095536	0.0147967	0.0147967	hypothetical protein	211	166	216	93	64	91
G372_RS0109860	1.50427e-07	2.51054e-06	-0.615907	0.11727	5.01493	0.121788	0.00699181	0.00299033	0.0136366	0.0136366	DUF418 domain-containing protein	153	93	130	178	158	220
G372_RS0108645	1.583e-07	2.62563e-06	0.812891	0.155054	5.37894	0.227087	0.0053967	0.0306658	0.0115686	0.0306658	DUF4168 domain-containing protein	360	366	360	104	141	147
G372_RS0109935	1.69322e-07	2.79121e-06	0.456933	0.0873642	6.57388	0.0717953	0.00162005	0.00982871	0.00966445	0.00982871	RNA polymerase subunit sigma-24	941	993	1076	481	466	596
G372_RS0103535	1.7834e-07	2.92195e-06	0.527969	0.101132	7.18921	0.0958987	0.000704024	0.0146375	0.010579	0.0146375	methylenetetrahydrofolate reductase [NAD(P)H]	1891	1654	2267	1049	765	949
G372_RS0110095	1.84808e-07	3.00957e-06	0.464959	0.089175	6.1949	0.0684273	0.0021253	0.00233884	0.00980297	0.00980297	lipoprotein signal peptidase	732	575	775	359	310	380
G372_RS0105755	1.90303e-07	3.08039e-06	-0.676092	0.129804	4.93038	0.157349	0.00800581	0.0172677	0.0142194	0.0172677	thymidylate synthase	99	116	114	174	129	234
G372_RS0100290	2.02416e-07	3.25425e-06	-0.44309	0.085257	6.85401	0.0634218	0.000971655	0.00468243	0.00993148	0.00993148	GGDEF domain-containing protein	985	695	882	1151	876	1186
G372_RS0110195	2.03466e-07	3.25425e-06	-0.465637	0.0896121	6.15193	0.0684059	0.00219522	0.00200533	0.00985028	0.00985028	glycine--tRNA ligase subunit alpha	429	360	459	482	456	684
G372_RS0102305	2.0507e-07	3.2605e-06	0.444727	0.085612	6.74862	0.0615604	0.00119373	0.00158844	0.0098004	0.0098004	RNA pyrophosphohydrolase	1288	1000	1295	636	534	677
G372_RS0111955	2.33156e-07	3.67189e-06	-0.546653	0.10572	6.75727	0.103061	0.00122531	0.0155399	0.00980979	0.0155399	DUF1987 domain-containing protein	709	634	860	1121	912	1022
G372_RS0112040	2.33678e-07	3.67189e-06	0.781681	0.151186	4.8094	0.210736	0.0101909	0.0240948	0.0150353	0.0240948	cobalamin biosynthesis protein	180	228	199	67	60	101
G372_RS0105300	2.40227e-07	3.75285e-06	0.479779	0.0928875	6.42279	0.0794101	0.00148624	0.0114559	0.00964799	0.0114559	excinuclease ABC subunit UvrC	947	731	955	512	352	455
G372_RS0104100	2.4235e-07	3.76414e-06	0.718503	0.13915	5.80592	0.178109	0.0029521	0.0260919	0.0103519	0.0260919	anthranilate synthase component I	509	605	482	205	184	238
G372_RS0111950	2.64512e-07	4.08473e-06	-0.447604	0.086962	7.20102	0.0679793	0.000735736	0.00910747	0.0106078	0.0106078	hypothetical protein	1359	1020	1226	1718	1244	1596
G372_RS0104450	2.66271e-07	4.0884e-06	0.441538	0.0858042	6.87334	0.059166	0.00108414	-0.000235071	0.00995939	0.00995939	FliI/YscN family ATPase	1496	1133	1424	710	582	813
G372_RS0112565	2.91908e-07	4.45657e-06	0.530393	0.103419	5.66025	0.0972294	0.0038566	0.0121865	0.0106926	0.0121865	DUF2237 domain-containing protein	477	349	434	228	172	196
G372_RS0100265	2.9994e-07	4.55333e-06	-0.47287	0.0922947	5.97653	0.0745064	0.00270154	0.00657901	0.0100759	0.0100759	prepilin-type cleavage/methylation domain-containing protein	368	316	356	382	403	583
G372_RS0105165	3.08942e-07	4.63999e-06	0.503841	0.0984467	7.61927	0.0877869	0.000547368	0.0139903	0.0117551	0.0139903	aspartate kinase	3414	2589	2812	1344	1069	1998
G372_RS0109610	3.09102e-07	4.63999e-06	-0.784561	0.1533	4.21808	0.186765	0.0154775	-0.0128474	0.0197739	0.0197739	hypothetical protein	55	46	51	94	72	107
G372_RS0100815	3.30325e-07	4.93101e-06	1.07017	0.20962	8.33804	0.396306	0.000337433	0.0655735	0.0143515	0.0655735	molecular chaperone DnaK	9503	6450	8195	3266	1501	2164
G372_RS0105290	3.93343e-07	5.83929e-06	0.621042	0.122442	5.09567	0.133698	0.00659446	0.0158934	0.01309	0.0158934	CYTH domain-containing protein	279	210	259	131	90	104
G372_RS0110420	4.02139e-07	5.93708e-06	0.465403	0.0918327	6.07252	0.0672112	0.00270134	8.77705e-05	0.00994853	0.00994853	YdiU family protein	700	493	655	316	253	366
G372_RS0107725	4.14351e-07	6.08394e-06	1.10338	0.217962	3.48814	0.41619	0.0426947	0.0210034	0.0285664	0.0285664	hypothetical protein	63	55.1705	71	11	15	27
G372_RS0107955	4.32678e-07	6.31851e-06	-0.695416	0.137597	4.56429	0.167801	0.0100964	0.0183031	0.0168394	0.0183031	aldo/keto reductase	81	65	80	98	97	189
G372_RS0100615	4.41964e-07	6.41922e-06	0.438794	0.0868911	7.15729	0.0652755	0.000822323	0.00856935	0.0105028	0.0105028	50S ribosomal protein L10	1832	1626	1892	1041	781	973
G372_RS0109920	4.57273e-07	6.60587e-06	0.592818	0.117543	4.99428	0.110362	0.00694537	-0.000780692	0.0137791	0.0137791	nucleotidyltransferase family protein	237	174	260	102	79	117
G372_RS0104330	4.60848e-07	6.62192e-06	-0.457574	0.0907537	6.13252	0.0649719	0.00248125	0.000218339	0.0098731	0.0098731	hypothetical protein	413	361	454	501	427	655
G372_RS0104445	4.90044e-07	6.99818e-06	0.494307	0.0982684	5.63927	0.0764183	0.00373698	0.000158655	0.010748	0.010748	flagellar export protein FliJ	467	323	426	204	166	225
G372_RS0106345	4.92243e-07	6.99818e-06	-0.709252	0.141024	4.42348	0.154456	0.0118513	-0.00742093	0.0179802	0.0179802	hypothetical protein	69	55	71	115	90	116
G372_RS0102425	5.81257e-07	8.17717e-06	0.591226	0.118308	5.88306	0.121661	0.00313036	0.0178649	0.0102151	0.0178649	putative lipid II flippase FtsW	634	403	605	259	168	315
G372_RS0109770	5.78348e-07	8.17717e-06	0.488275	0.0976881	5.71021	0.0734424	0.00375133	-0.00135315	0.0105631	0.0105631	16S rRNA (cytosine(967)-C(5))-methyltransferase RsmB	493	349	458	206	177	261
G372_RS0112750	5.85712e-07	8.19692e-06	0.438589	0.0877904	7.28617	0.0604705	0.000739522	0.00271336	0.0108212	0.0108212	VWA domain-containing protein	1996	1806	2301	1026	892	1273
G372_RS0112690	6.12084e-07	8.52161e-06	0.552474	0.110775	9.13715	0.0948183	0.000120312	0.00394242	0.0182862	0.0182862	carboxysome shell protein	14259	11340	15711	6702	5193	7288
G372_RS0104395	6.29e-07	8.71198e-06	0.454509	0.0912285	6.0731	0.0644884	0.00253617	0.000607463	0.00994779	0.00994779	flagellar biosynthesis protein FlhA	641	543	640	321	273	340
G372_RS0106325	6.32701e-07	8.7183e-06	-0.962749	0.193286	3.67347	0.303018	0.0301729	0.00101791	0.0258663	0.0258663	ABC transporter permease	34	25	22	65	44	64
G372_RS0108160	6.81776e-07	9.34659e-06	-0.596858	0.120177	4.93316	0.118306	0.00746344	0.00682929	0.0142004	0.0142004	hypothetical protein	127	101	116	181	117	222
G372_RS0101205	6.85836e-07	9.35452e-06	0.491515	0.0989894	8.35782	0.0760538	0.000263333	0.00420874	0.014435	0.014435	methyltransferase domain-containing protein	6391	5615	6235	3169	2320	3648
G372_RS0102805	7.2394e-07	9.82438e-06	-0.550306	0.111065	5.21148	0.101225	0.00613175	0.0068351	0.0123713	0.0123713	CBS domain-containing protein	172	116	185	235	181	238
G372_RS0111375	7.38176e-07	9.96723e-06	-0.573316	0.115797	7.28473	0.114698	0.00083395	0.0192795	0.0108175	0.0192795	hypothetical protein	1293	967	1447	1418	1577	2368
G372_RS13565	8.96561e-07	1.19929e-05	1.35265	0.275316	9.43092	0.639859	0.000105384	0.113593	0.0200375	0.113593	thiosulfate oxidation carrier complex protein SoxZ	22771	26919	33228	3468	6044	8796
G372_RS0112775	8.97124e-07	1.19929e-05	-0.756567	0.153994	4.59684	0.200175	0.0109502	0.0246211	0.0165864	0.0246211	malto-oligosyltrehalose trehalohydrolase	62	69	99	117	123	151
G372_RS0103485	9.2443e-07	1.22968e-05	0.50787	0.103497	5.4561	0.0845579	0.00477966	0.00419306	0.0112879	0.0112879	hypothetical protein	374	262	386	145	142	209
G372_RS0111025	9.29805e-07	1.23073e-05	-0.694395	0.141542	4.50359	0.158264	0.012729	0.00428204	0.0173221	0.0173221	sulfite exporter TauE/SafE family protein	80	57	77	93	103	156
G372_RS0105435	9.67229e-07	1.27119e-05	-0.560605	0.114451	5.09531	0.101934	0.00655624	0.003007	0.0130924	0.0130924	nucleotide sugar dehydrogenase	129	136	146	190	159	240
G372_RS0113370	9.6983e-07	1.27119e-05	0.430625	0.0879245	6.36005	0.0633188	0.0019242	0.00768517	0.00967188	0.00967188	PQQ-dependent sugar dehydrogenase	993	612	837	422	361	480
G372_RS0101770	9.95701e-07	1.29876e-05	-0.502685	0.102746	5.98532	0.0884757	0.0028719	0.0129633	0.0100638	0.0129633	hypothetical protein	334	287	424	498	404	479
G372_RS0100940	1.03533e-06	1.33819e-05	0.49716	0.101777	7.6919	0.0865807	0.00050907	0.0150288	0.0119804	0.0150288	30S ribosomal protein S3	3500	2557	3419	1800	1289	1554
G372_RS0101550	1.04087e-06	1.33819e-05	0.573547	0.11744	5.00143	0.105415	0.00695845	0.00145193	0.0137297	0.0137297	type II toxin-antitoxin system prevent-host-death family antitoxin	215	184	269	103	83	116
G372_RS0107845	1.04017e-06	1.33819e-05	-0.42519	0.0870598	6.37963	0.0623116	0.00170642	0.00838813	0.0096627	0.0096627	ArsR family transcriptional regulator	645	452	512	719	517	754
G372_RS0107830	1.12643e-06	1.4413e-05	0.563076	0.115665	5.14907	0.102026	0.00732161	0.00131518	0.012746	0.012746	pH regulation protein F	292	234	239	119	104	127
G372_RS0108380	1.18949e-06	1.51477e-05	-0.485935	0.10004	5.57342	0.0821857	0.0040842	0.0100983	0.0109279	0.0109279	FHA domain-containing protein	247	203	241	282	307	315
G372_RS0108290	1.25055e-06	1.58502e-05	0.533761	0.110112	5.1933	0.0879059	0.00570998	-0.00266561	0.0124769	0.0124769	tRNA (adenosine(37)-N6)-threonylcarbamoyltransferase complex transferase subunit TsaD	286	213	293	121	110	141
G372_RS0111485	1.27721e-06	1.6112e-05	1.3354	0.275722	6.76002	0.626213	0.00162653	0.112408	0.00981283	0.112408	Hsp20/alpha crystallin family protein	2189	1550	1936	650	313	307
G372_RS0110550	1.30081e-06	1.63331e-05	-0.441591	0.0912448	7.70003	0.0626957	0.000482257	0.00476131	0.0120062	0.0120062	type I secretion system permease/ATPase	2304	1537	2165	2384	2158	2937
G372_RS0104480	1.32725e-06	1.65876e-05	0.643132	0.132999	8.69782	0.145312	0.000178398	0.0263545	0.0159779	0.0263545	sigma-54-dependent Fis family transcriptional regulator	12065	6749	9567	4331	2818	4855
G372_RS0106070	1.41446e-06	1.75957e-05	-0.435037	0.0902013	6.03763	0.0654453	0.00221044	0.0086247	0.00999397	0.00999397	4-(cytidine 5'-diphospho)-2-C-methyl-D-erythritol kinase	412	326	392	450	462	490
G372_RS0110335	1.58999e-06	1.9688e-05	-1.16031	0.241753	4.35075	0.47403	0.0169071	0.0707595	0.0185983	0.0707595	50S ribosomal protein L34	49	53	42	89	98	218
G372_RS0101425	1.6167e-06	1.99269e-05	0.718515	0.149808	4.30548	0.172146	0.0146711	0.00691206	0.0189925	0.0189925	glutaredoxin family protein	139	116	101	42	38	61
G372_RS0103565	1.89752e-06	2.32815e-05	0.440778	0.0925218	7.8357	0.0632992	0.000390128	0.00587696	0.0124503	0.0124503	pyruvate kinase	4284	2782	3632	1835	1504	2189
G372_RS0105330	1.95784e-06	2.39124e-05	-0.411476	0.0864859	7.15096	0.0510805	0.0007317	-0.000373396	0.010488	0.010488	hypothetical protein	1274	986	1229	1367	1188	1712
G372_RS0112755	2.19018e-06	2.6629e-05	0.44193	0.0933319	5.86643	0.0588336	0.00282366	-0.00251994	0.0102426	0.0102426	LysR family transcriptional regulator	532	416	531	249	217	302
G372_RS0106040	2.50063e-06	3.02666e-05	0.899661	0.191089	4.22423	0.286635	0.0172895	0.037483	0.0197181	0.037483	hypothetical protein	104	132	122	32	43	42
G372_RS0112525	2.54086e-06	3.06156e-05	0.837464	0.178001	4.39409	0.248425	0.0158473	0.0316793	0.0182277	0.0316793	Fe-S protein assembly co-chaperone HscB	135	130	145	46	30	77
G372_RS0111865	2.60139e-06	3.1205e-05	0.406205	0.0864263	6.47361	0.0549133	0.00156313	0.00520259	0.00964112	0.00964112	di-trans,poly-cis-decaprenylcistransferase	1082	730	873	486	405	542
G372_RS0107155	2.71968e-06	3.2371e-05	-0.599818	0.127868	4.75033	0.109996	0.00907655	-0.0064989	0.0154486	0.0154486	RidA family protein	97	83	106	139	112	175
G372_RS0107825	2.72268e-06	3.2371e-05	0.533973	0.113836	5.13866	0.0947136	0.00662652	0.00484293	0.0128116	0.0128116	Na+/H+ antiporter subunit E	269	220	256	137	88	132
G372_RS0104090	3.05003e-06	3.61032e-05	0.762436	0.163353	4.10733	0.183882	0.0192067	-0.00734462	0.0208195	0.0208195	Bcr/CflA family drug resistance efflux transporter	105	97	94	41	29	42
G372_RS0108150	3.11113e-06	3.6665e-05	-0.407846	0.0874579	7.23679	0.0527468	0.000777078	0.00277955	0.0106962	0.0106962	hypothetical protein	1381	1041	1397	1408	1301	1953
G372_RS0108240	3.21484e-06	3.77217e-05	0.455138	0.0977406	5.67614	0.065149	0.0036788	7.59183e-05	0.010651	0.010651	cadmium-translocating P-type ATPase	406	368	453	196	185	249
G372_RS0101215	3.83126e-06	4.45653e-05	-0.550723	0.119196	6.22779	0.108038	0.00238506	0.0189263	0.00977003	0.0189263	bifunctional phosphoribosylaminoimidazolecarboxamide formyltransferase/IMP cyclohydrolase PurH	506	392	395	535	463	866
G372_RS13755	3.82406e-06	4.45653e-05	-0.697954	0.151049	4.26961	0.153275	0.0149135	-0.00599751	0.01931	0.01931	hypothetical protein	53	55	59	88	74	114
G372_RS0103015	3.93928e-06	4.56244e-05	0.744353	0.161305	5.92236	0.197441	0.00285797	0.0361711	0.0101538	0.0361711	30S ribosome-binding factor RbfA	780	417	673	281	184	237
G372_RS0107865	4.14865e-06	4.7843e-05	-0.703417	0.152791	6.81522	0.176453	0.00120019	0.0338174	0.00987905	0.0338174	cyclic nucleotide-binding domain-containing protein	769	600	788	1466	1020	1052
G372_RS0107260	4.2735e-06	4.90722e-05	0.395693	0.0860649	6.93619	0.0501395	0.00105243	0.00290702	0.0100583	0.0100583	ribonuclease G	1478	1190	1547	824	614	859
G372_RS0108445	4.34839e-06	4.97197e-05	1.34354	0.292456	9.83794	0.644167	7.92093e-05	0.128216	0.0227493	0.128216	thiosulfate oxidation carrier protein SoxY	35275	38418	50272	4962	9519	13419
G372_RS0103355	4.4175e-06	5.02959e-05	-0.590917	0.12872	5.74788	0.124638	0.00309783	0.0217555	0.0104735	0.0217555	methionine--tRNA ligase metG	289	273	221	353	308	496
G372_RS0100510	4.54487e-06	5.15277e-05	0.406254	0.0886095	6.26023	0.0563761	0.00203687	0.00654231	0.0097406	0.0097406	LLM class flavin-dependent oxidoreductase	748	615	790	423	333	399
G372_RS0112185	4.81796e-06	5.43944e-05	-0.422511	0.0924014	5.94451	0.0565831	0.00268586	0.00109958	0.0101212	0.0101212	endonuclease	359	286	395	446	348	487
G372_RS0103050	5.18404e-06	5.82825e-05	0.799187	0.175368	7.0061	0.228515	0.00108643	0.0450445	0.0101828	0.0450445	NADH-quinone oxidoreductase subunit M	1490	1906	2165	787	554	671
G372_RS0104485	5.37078e-06	6.01303e-05	0.473027	0.103967	5.6789	0.0800974	0.00367121	0.0125426	0.0106438	0.0125426	hypothetical protein	496	302	468	224	157	252
G372_RS0105375	5.74692e-06	6.40746e-05	-0.483975	0.106708	5.26633	0.0758939	0.00500677	0.00202357	0.0120733	0.0120733	HAMP domain-containing protein	174	158	175	236	194	236
G372_RS0113035	5.79559e-06	6.43502e-05	0.445563	0.0982778	5.65607	0.0700722	0.00378417	0.00935855	0.0107036	0.0107036	DUF2063 domain-containing protein	443	296	479	207	159	262
G372_RS0104120	5.8658e-06	6.48617e-05	0.506286	0.111734	5.20627	0.091879	0.00588969	0.012837	0.0124012	0.012837	membrane protein	232	255	301	124	118	139
G372_RS0106520	5.94388e-06	6.54558e-05	-0.605699	0.133756	4.5884	0.1109	0.0101844	-0.00913593	0.0166517	0.0166517	BON domain-containing protein	89	67	87	116	99	147
G372_RS0101270	6.01076e-06	6.59221e-05	0.45031	0.0994939	5.59961	0.0699616	0.00399347	0.00741629	0.0108551	0.0108551	PIN domain-containing protein	379	318	443	218	146	227
G372_RS0107105	6.12348e-06	6.66566e-05	0.466762	0.103218	8.15991	0.0781449	0.00029321	0.0156879	0.0136297	0.0156879	S41 family peptidase	5784	4326	4758	2916	2025	2603
G372_RS0110315	6.12735e-06	6.66566e-05	0.550486	0.121737	4.90344	0.0988293	0.00782716	0.00207135	0.0144025	0.0144025	tRNA uridine-5-carboxymethylaminomethyl(34) synthesis GTPase MnmE	238	151	213	97	78	101
G372_RS0113030	6.49793e-06	7.04029e-05	0.402487	0.0892532	6.23378	0.0580443	0.00218483	0.009622	0.00976436	0.00976436	DUF692 domain-containing protein	782	576	741	418	268	466
G372_RS13430	6.71703e-06	7.24845e-05	-0.388878	0.0863699	6.57422	0.050042	0.00152504	0.00431777	0.00966461	0.00966461	type I secretion C-terminal target domain-containing protein	732	518.502	745	761.277	709.455	881.34
G372_RS0113180	6.85798e-06	7.37096e-05	0.38829	0.086324	7.02807	0.048557	0.000952736	0.00320512	0.010225	0.010225	flagellar hook-associated protein 3	1575	1266	1778	868	680	981
G372_RS0109600	7.01034e-06	7.50469e-05	0.563582	0.125425	5.1269	0.114165	0.00646191	0.0171353	0.0128866	0.0171353	BolA family transcriptional regulator	266	229	251	132	104	107
G372_RS0108845	7.15941e-06	7.63386e-05	-0.542353	0.120821	4.91542	0.0977284	0.00757526	0.00428	0.0143214	0.0143214	tRNA-Val	120	110	116	184	129	173
G372_RS0106395	7.50707e-06	7.97293e-05	0.782656	0.174748	3.82416	0.197342	0.0218791	-0.00490754	0.023926	0.023926	DoxX family protein	69	77	79	30	22	31
G372_RS0111870	7.62368e-06	8.06489e-05	0.447861	0.10007	5.58126	0.0639762	0.004115	0.00063811	0.0109059	0.0109059	phosphatidate cytidylyltransferase	400	342	368	199	165	209
G372_RS0108545	7.67913e-06	8.0917e-05	-0.447903	0.100114	5.51627	0.0712523	0.00393888	0.00989512	0.0110953	0.0110953	oxidoreductase	258	160	261	263	235	351
G372_RS0113080	7.86358e-06	8.25368e-05	0.448314	0.100319	6.81076	0.0723725	0.00116582	0.0139302	0.00987332	0.0139302	phenylalanine--tRNA ligase subunit beta	1339	1092	1382	760	557	651
G372_RS0103055	8.08644e-06	8.45458e-05	0.60657	0.135914	7.67383	0.132545	0.000472679	0.0272364	0.0119237	0.0272364	NADH-quinone oxidoreductase subunit L	2844	3292	3648	1559	1283	1449
G372_RS0106165	8.43068e-06	8.74643e-05	0.385453	0.0865419	6.48667	0.0528903	0.00159296	0.00880462	0.0096413	0.0096413	thioredoxin	1007	767	900	478	359	667
G372_RS14100	8.41852e-06	8.74643e-05	-0.53712	0.120586	6.59938	0.103998	0.00142043	0.0203909	0.00967776	0.0203909	hypothetical protein	633	666	579	787	700	1164
G372_RS0102415	8.46378e-06	8.74699e-05	0.419489	0.0942014	6.02756	0.0634399	0.00222595	0.0110849	0.0100072	0.0110849	UDP-N-acetylmuramate--L-alanine ligase	597	443	697	333	233	353
G372_RS0113235	9.37847e-06	9.65515e-05	-0.623766	0.140772	7.5479	0.140506	0.000535648	0.0291896	0.0115414	0.0291896	superoxide dismutase	1412	1767	1481	2196	1952	2935
G372_RS0111280	1.01899e-05	0.000104505	-0.439196	0.0995208	5.4934	0.0608013	0.00369037	-2.35313e-05	0.0111662	0.0111662	TIGR03016 family PEP-CTERM system-associated outer membrane protein	250	172	237	270	223	332
G372_RS0112105	1.0412e-05	0.000106376	-0.405273	0.0919313	7.78995	0.0584305	0.00037969	0.011066	0.0122974	0.0122974	hypothetical protein	2390	1808	2454	2961	2332	2714
G372_RS0112230	1.05623e-05	0.000107503	0.54606	0.123954	5.0304	0.107892	0.00680478	0.0162423	0.0135304	0.0162423	hypothetical protein	254	170	258	127	80	111
G372_RS0103575	1.11647e-05	0.000112781	-0.431932	0.0983162	5.5876	0.0672543	0.00361089	0.0104951	0.0108882	0.0108882	hypothetical protein	279	228	215	268	269	364
G372_RS0113010	1.11241e-05	0.000112781	0.714306	0.162561	4.13307	0.167454	0.0190705	-0.00108962	0.0205685	0.0205685	carboxymuconolactone decarboxylase family protein	120	81	99	33	32	55
G372_RS0105685	1.19957e-05	0.000120721	-0.583665	0.133328	7.54708	0.123531	0.000514906	0.0261496	0.011539	0.0261496	serine hydroxymethyltransferase glyA	1808	1617	1339	2095	1819	3101
G372_RS0107040	1.2185e-05	0.000122168	0.95373	0.218033	7.63679	0.329927	0.000540049	0.0707674	0.0118088	0.0707674	ATP-dependent chaperone ClpB	4611	2847	3919	1720	789	1135
G372_RS0103070	1.32617e-05	0.00013247	0.546044	0.125362	6.21813	0.108308	0.0021494	0.021424	0.00977939	0.021424	NADH-quinone oxidoreductase subunit NuoI	686	744	774	392	296	346
G372_RS0103630	1.37569e-05	0.000136907	0.616645	0.141832	4.51125	0.118919	0.0129141	-0.00685888	0.0172604	0.0172604	pseudouridine synthase	138	123	153	59	46	78
G372_RS0108125	1.72384e-05	0.000170921	-1.15168	0.26796	7.21339	0.484073	0.000799069	0.106905	0.0106382	0.106905	cytochrome-c peroxidase	589	758	1373	1776	2116	2709
G372_RS0105750	1.78948e-05	0.000176777	-0.887966	0.207002	4.43469	0.287965	0.0135042	0.0507703	0.0178867	0.0507703	prolipoprotein diacylglyceryl transferase	68	59	53	92	87	203
G372_RS0108250	1.79957e-05	0.000177122	0.369367	0.0861314	6.95008	0.0482616	0.00104609	0.00811894	0.0100818	0.0100818	cytochrome c oxidase accessory protein CcoG	1475	1291	1432	704	624	1073
G372_RS13530	1.9113e-05	0.000187433	-0.572788	0.133985	4.60405	0.109412	0.0103971	0.00333515	0.0165309	0.0165309	hypothetical protein	84	78.1451	87.0775	120	115.501	121.494
G372_RS0110530	1.9771e-05	0.000193181	-0.407627	0.0955199	8.00933	0.0607969	0.00031421	0.0133719	0.0130608	0.0133719	cytochrome c4	2740	2843	2620	3091	2814	4176
G372_RS0101915	2.09429e-05	0.000203225	-0.697314	0.163897	4.09526	0.178109	0.0172856	0.0230077	0.0209388	0.0230077	iron ABC transporter permease	39	50	52	64	64	107
G372_RS0110735	2.09503e-05	0.000203225	-0.489537	0.115063	5.19944	0.0877814	0.00595652	0.0139027	0.0124409	0.0139027	tryptophan synthase subunit beta	145	147	183	221	192	210
G372_RS13455	2.1701e-05	0.00020975	-0.925543	0.217948	5.51733	0.31399	0.0048613	0.0663904	0.011092	0.0663904	hypothetical protein	203.743	202.621	127.591	341.973	256.81	507.807
G372_RS0107325	2.22518e-05	0.000214303	-0.432329	0.10194	5.66543	0.0685426	0.00330432	0.0122834	0.010679	0.0122834	adenylate kinase	253	251	272	279	266	447
G372_RS0112725	2.23476e-05	0.000214457	0.4155	0.0979942	7.76901	0.0633155	0.000404297	0.014	0.0122284	0.014	bacterioferritin	2921	3064	3812	1765	1515	1921
G372_RS0110360	2.24372e-05	0.00021455	0.375963	0.0886884	6.8549	0.0518433	0.00123096	0.0105675	0.00993272	0.0105675	hypothetical protein	1371	986	1531	671	665	786
G372_RS0110090	2.33114e-05	0.00022212	0.391009	0.0924249	5.94901	0.0534067	0.00269885	0.00672666	0.0101147	0.0101147	peptidylprolyl isomerase	626	415	537	255	238	372
G372_RS0108515	2.60143e-05	0.000246998	-1.33014	0.316262	3.5706	0.650806	0.0406783	0.109354	0.0273198	0.109354	hypothetical protein	24	19	17	35	56	119
G372_RS0112620	2.61727e-05	0.000247627	0.483784	0.115065	5.06789	0.0856375	0.00658453	0.0126947	0.0132754	0.0132754	thiol reductant ABC exporter subunit CydC	254	181	247	134	79	131
G372_RS0107275	2.67438e-05	0.000251499	0.573064	0.136458	7.12148	0.120866	0.00082512	0.0271062	0.0104208	0.0271062	metalloprotease TldD	2027	1430	2136	1037	683	820
G372_RS0112745	2.67691e-05	0.000251499	0.460241	0.109598	7.64447	0.0779607	0.00049411	0.0175236	0.0118324	0.0175236	CbbQ/NirQ/NorQ/GpvN family protein	2671	2468	3809	1487	1216	1828
G372_RS0103920	2.73705e-05	0.000256253	-0.525397	0.125264	5.19317	0.101642	0.00571141	0.0178253	0.0124776	0.0178253	AraC family transcriptional regulator	154	116	203	234	170	232
G372_RS0113160	2.78267e-05	0.00025962	0.391415	0.0934039	6.00509	0.0564307	0.00267109	0.0104153	0.0100371	0.0104153	flagellar basal body L-ring protein FlgH	520	477	666	330	238	340
G372_RS0109785	2.8902e-05	0.000268719	-0.396982	0.0949276	8.04045	0.0520029	0.000341544	0.00556399	0.0131753	0.0131753	LysM domain-containing protein	2919	2452	3181	3410	3136	3670
G372_RS0104605	3.18399e-05	0.000295013	-0.355466	0.0854507	6.69413	0.0390029	0.00120584	0.000164303	0.00974691	0.00974691	PAS domain S-box protein	819	674	772	878	748	988
G372_RS0102045	3.23298e-05	0.000298523	0.492273	0.118437	7.03942	0.0895325	0.00100695	0.0200341	0.0102474	0.0200341	uroporphyrinogen decarboxylase	1693	1547	1637	943	695	782
G372_RS0103020	3.25296e-05	0.000299339	0.486078	0.116987	7.70457	0.0873047	0.000537801	0.019991	0.0120206	0.019991	translation initiation factor IF-2	3749	2546	3275	1862	1311	1560
G372_RS0109175	3.65875e-05	0.000335531	0.353229	0.0855684	6.83087	0.040476	0.00108331	0.0027226	0.00989961	0.00989961	LysM peptidoglycan-binding domain-containing protein	1427	988	1320	707	603	792
G372_RS0107600	3.72396e-05	0.00034035	0.621198	0.150631	5.67514	0.142994	0.00357552	0.0304591	0.0106536	0.0304591	DsrE family protein	540	380	422	248	145	195
G372_RS0102090	4.14322e-05	0.000377384	0.89588	0.218542	6.78936	0.298093	0.00137521	0.0702658	0.00984679	0.0702658	molecular chaperone HtpG	1893	1290	1519	755	319	548
G372_RS0112365	4.28068e-05	0.000388587	0.410943	0.100431	6.1029	0.062766	0.00218417	0.0129455	0.0099095	0.0129455	ABC transporter ATP-binding protein	670	533	639	381	230	397
G372_RS0103305	4.58428e-05	0.000411972	0.434382	0.106574	5.32398	0.0693568	0.00523909	0.0106989	0.011798	0.011798	class I SAM-dependent methyltransferase	331	217	317	166	128	152
G372_RS0103620	4.57319e-05	0.000411972	0.623363	0.152919	4.24519	0.13929	0.0155476	0.0128469	0.0195287	0.0195287	5'-3' exonuclease	129	95	96	53	31	57
G372_RS0104640	4.58301e-05	0.000411972	0.785222	0.192648	6.74265	0.229508	0.00126468	0.0544054	0.00979405	0.0544054	protease HtpX	1800	1076	1410	715	370	512
G372_RS0100840	4.6782e-05	0.000417619	0.475444	0.116784	6.65861	0.0841801	0.00145345	0.0190042	0.00971739	0.0190042	50S ribosomal protein L17	1015	1081	1215	630	465	572
G372_RS0101090	4.66675e-05	0.000417619	-0.348994	0.0857117	6.7543	0.0392969	0.0012132	0.00223412	0.00980654	0.00980654	PilZ domain-containing protein	810	764	833	899	787	1088
G372_RS0100565	4.87775e-05	0.000433991	-0.363732	0.089558	6.11506	0.0463986	0.00213662	0.00624887	0.00989434	0.00989434	septum site-determining protein MinD	490	385	392	518	401	556
G372_RS0107675	5.07388e-05	0.000449951	-0.718885	0.177406	4.73823	0.192806	0.00943398	0.0377755	0.015535	0.0377755	succinylglutamate desuccinylase	93	84	88	110	119	240
G372_RS0107665	5.11327e-05	0.000451953	-0.386314	0.0953769	5.80857	0.047478	0.00329834	8.48596e-05	0.0103468	0.0103468	cysteine--tRNA ligase	304	277	338	353	321	420
G372_RS0100945	5.17382e-05	0.000454316	0.418401	0.103369	6.78785	0.0653402	0.00112385	0.014904	0.00984497	0.014904	50S ribosomal protein L22	1353	1058	1260	755	556	641
G372_RS0109495	5.17039e-05	0.000454316	-0.363765	0.0898677	7.56419	0.041609	0.000524757	0.00186454	0.0115896	0.0115896	UTP--glucose-1-phosphate uridylyltransferase	1892	1556	1947	2203	1738	2336
G372_RS0105585	5.4039e-05	0.000472974	-0.386752	0.0957914	8.11923	0.0514302	0.000291706	0.00790481	0.0134723	0.0134723	acetate--CoA ligase	3152	2679	3468	3873	3301	3829
G372_RS0101195	5.54967e-05	0.000484154	0.434337	0.107744	8.95361	0.0610346	0.000135807	0.00541428	0.0172774	0.0172774	methionine synthase	10973	9322	11994	6149	4452	6378
G372_RS0109185	5.62868e-05	0.000489458	0.374846	0.0930634	5.90466	0.0450455	0.00281032	0.000805366	0.0101809	0.0101809	hypothetical protein	557	443	483	269	242	311
G372_RS0103995	5.84116e-05	0.000506297	0.486541	0.121056	5.21774	0.0886023	0.0051876	0.0167943	0.0123356	0.0167943	DUF3301 domain-containing protein	287	218	286	106	106	193
G372_RS0108835	5.9182e-05	0.000511325	0.572047	0.14244	8.40206	0.122518	0.000234302	0.0301995	0.0146242	0.0301995	endopeptidase La	7584	5294	7181	3895	2293	3039
G372_RS0113170	6.09853e-05	0.000525217	0.532017	0.132707	5.7852	0.106046	0.00328981	0.0231269	0.0103933	0.0231269	flagellar assembly peptidoglycan hydrolase FlgJ	438	449	536	244	152	301
G372_RS0107550	6.37393e-05	0.000547181	0.356478	0.0891524	6.22771	0.0458921	0.00215213	0.00755932	0.0097701	0.0097701	VWA domain-containing protein	715	600	713	434	318	398
G372_RS0113200	6.42081e-05	0.00054945	-0.378905	0.0948024	5.79817	0.0527357	0.00311409	0.00896717	0.0103671	0.0103671	ergothioneine biosynthesis protein EgtC	300	259	359	382	321	372
G372_RS0109295	6.70628e-05	0.000572057	-0.774932	0.19439	5.59746	0.225501	0.00353577	0.0531457	0.010861	0.0531457	[acyl-carrier-protein] S-malonyltransferase	218	223	173	286	282	561
G372_RS0101420	7.15672e-05	0.000608548	0.346591	0.0872801	7.17729	0.0394035	0.000876517	0.00333093	0.0105502	0.0105502	PDZ domain-containing protein	2030	1472	1744	950	804	1263
G372_RS0102430	7.33243e-05	0.000621522	0.501848	0.126562	5.76978	0.0947768	0.00349856	0.0205283	0.0104255	0.0205283	UDP-N-acetylmuramoyl-L-alanine--D-glutamate ligase	501	341	563	227	159	309
G372_RS13785	7.74583e-05	0.000654498	0.398551	0.100845	5.54358	0.0518966	0.00424072	0.00106405	0.0110137	0.0110137	hypothetical protein	416.206	274.872	364.875	182.353	156.33	231.483
G372_RS0108800	7.7789e-05	0.000655232	0.406266	0.102823	5.43478	0.0605476	0.00449763	0.00929234	0.0113613	0.0113613	7-cyano-7-deazaguanine synthase QueC	388	254	309	187	127	198
G372_RS0112255	7.87882e-05	0.000661574	0.361668	0.0916067	6.01347	0.0438847	0.00256183	0.00324255	0.0100259	0.0100259	ATP-dependent helicase	580	464	602	273	259	405
G372_RS0104195	8.10177e-05	0.000678177	-0.440218	0.111692	6.07505	0.0731078	0.0022875	0.0164251	0.00994525	0.0164251	2,3,4,5-tetrahydropyridine-2,6-dicarboxylate N-succinyltransferase	418	379	369	559	416	494
G372_RS0108500	8.19649e-05	0.000683974	-0.641998	0.163002	4.01701	0.15033	0.0181151	0.015237	0.0217395	0.0217395	hypothetical protein	47	50	37	67	54	88
G372_RS0109500	8.26704e-05	0.000687726	-0.425131	0.107997	6.64558	0.068217	0.0013058	0.0161891	0.00970763	0.0161891	competence protein ComEA	842	582	677	951	764	857
G372_RS0113085	8.29943e-05	0.000688289	0.338094	0.085907	6.93156	0.0421568	0.00101943	0.00881109	0.0100506	0.0100506	integration host factor subunit alpha	1484	1057	1569	859	637	854
G372_RS0105520	8.75951e-05	0.000724209	-0.336259	0.0857232	6.70067	0.0379729	0.0012699	0.00379505	0.0097528	0.0097528	DNA polymerase III subunit gamma/tau	897	664	751	800	740	1086
G372_RS0106220	9.09264e-05	0.000749445	0.386642	0.0987942	7.04563	0.05656	0.000983234	0.0136572	0.0102598	0.0136572	HPr(Ser) kinase/phosphatase	1626	1482	1547	754	674	1204
G372_RS0111035	9.30913e-05	0.00076261	-0.485617	0.124265	4.82345	0.0864173	0.00822353	0.0113641	0.014939	0.014939	CBS domain-containing protein	100	89	142	131	124	176
G372_RS0111875	9.29135e-05	0.00076261	0.335428	0.0858226	6.76633	0.0406216	0.00122838	0.00735661	0.00981989	0.00981989	1-deoxy-D-xylulose-5-phosphate reductoisomerase	1300	979	1173	722	576	687
G372_RS0102445	9.46049e-05	0.000772654	0.445257	0.114051	5.43662	0.0750851	0.00488194	0.0146294	0.0113549	0.0146294	UDP-N-acetylmuramoyl-L-alanyl-D-glutamate--2,6-diaminopimelate ligase	346	240	391	159	123	228
G372_RS0100600	9.70687e-05	0.000790374	0.476452	0.122236	8.90562	0.086032	0.000145093	0.0222674	0.0170243	0.0222674	DNA-directed RNA polymerase subunit beta'	10018	9175	12312	6256	4292	5286
G372_RS0104130	0.000104343	0.000847042	0.353203	0.0910255	6.04574	0.0383011	0.0024451	-0.00135088	0.00998336	0.00998336	5-(carboxyamino)imidazole ribonucleotide synthase	610	499	579	303	267	395
G372_RS0102210	0.000104849	0.000848585	0.485872	0.125254	4.86647	0.0808772	0.00888392	0.00368589	0.014649	0.014649	glycine cleavage system protein R	212	143	205	78	84	115
G372_RS0108940	0.000111029	0.000895903	0.438092	0.113345	5.14888	0.0596228	0.00652336	-0.00396672	0.0127472	0.0127472	hypothetical protein	270	198	253	117	111	146
G372_RS0104900	0.000113746	0.000915076	-0.524601	0.135934	8.28161	0.104736	0.000240574	0.0274766	0.014117	0.0274766	bifunctional diguanylate cyclase/phosphodiesterase	2851	3179	4277	4449	4266	5163
G372_RS0102400	0.000114996	0.000919626	0.532568	0.138094	5.29727	0.107972	0.00561461	0.0229904	0.0119204	0.0229904	cell division protein FtsQ	294	236	351	132	95	205
G372_RS0108505	0.000114686	0.000919626	-1.29579	0.335939	2.51358	0.611676	0.118764	0.0161799	0.0505185	0.0505185	hypothetical protein	12	4	6	15	18	33
G372_RS0108095	0.000117214	0.000934578	0.702135	0.182284	4.24316	0.187771	0.0174616	0.0323795	0.019547	0.0323795	cobalt-precorrin-6A reductase	132	86	116	39	29	73
G372_RS0111675	0.00011989	0.000953089	0.377677	0.0981911	5.91685	0.0543618	0.0031336	0.0113286	0.0101622	0.0113286	hypothetical protein	622	400	499	299	242	289
G372_RS0100410	0.000120648	0.00095629	-0.345184	0.0897793	6.07285	0.044836	0.00214237	0.00922067	0.0099481	0.0099481	sodium-dependent transporter	388	414	417	450	411	535
G372_RS14035	0.000121348	0.000959004	0.49811	0.129602	4.79179	0.0828046	0.0100379	0.000425025	0.0151571	0.0151571	hypothetical protein	205.328	152	162	92.3908	68	94
G372_RS0103025	0.000131514	0.00103207	-0.384961	0.10068	6.81446	0.0566224	0.00106396	0.0141408	0.00987806	0.0141408	transcription termination/antitermination protein NusA	951	828	743	954	797	1280
G372_RS0109325	0.000131746	0.00103207	0.344408	0.0900843	6.10895	0.0422373	0.00227086	0.00604449	0.00990192	0.00990192	endolytic transglycosylase MltG	723	488	596	313	283	442
G372_RS0111840	0.000131522	0.00103207	-0.346933	0.0907347	6.00638	0.0435708	0.00231387	0.00701378	0.0100353	0.0100353	type I methionyl aminopeptidase	416	328	401	472	313	550
G372_RS0102440	0.000132963	0.00103858	0.470368	0.123104	6.49622	0.0845591	0.00154779	0.021184	0.00964195	0.021184	UDP-N-acetylmuramoyl-tripeptide--D-alanyl-D-alanine ligase	1066	664	1148	467	353	629
G372_RS0109765	0.000138743	0.00108058	0.515536	0.135297	4.61936	0.0861208	0.0110441	-0.00305946	0.0164138	0.0164138	DUF4390 domain-containing protein	145	142	150	74	60	77
G372_RS0107540	0.000147945	0.00114892	-0.688568	0.181465	6.89565	0.181753	0.00110878	0.0482856	0.00999308	0.0482856	hypothetical protein	738	902	711	1198	887	1843
G372_RS0113150	0.000149624	0.00115862	0.449036	0.118426	6.55331	0.0773196	0.00154098	0.0194961	0.00965546	0.0194961	flagellar basal-body rod protein FlgF	852	882	1243	512	437	568
G372_RS0111285	0.000160334	0.00123798	-0.433949	0.114969	5.034	0.0696736	0.0063211	0.010154	0.0135057	0.0135057	protein tyrosine kinase	163	102	155	148	149	226
G372_RS0103695	0.000166098	0.00127881	-0.80274	0.213173	5.58122	0.247849	0.00397029	0.0641937	0.010906	0.0641937	hypothetical protein	172	229	195	282	280	569
G372_RS0104670	0.000170856	0.00131169	0.449098	0.119485	6.54027	0.0776386	0.00153272	0.0198822	0.00965088	0.0198822	hypothetical protein	945	969	981	408	447	670
G372_RS0101645	0.000175127	0.00134065	0.47964	0.127821	4.8115	0.0744489	0.00948654	-0.00269582	0.0150208	0.0150208	FAD-dependent oxidoreductase	197	154	172	78	81	102
G372_RS0100590	0.000187083	0.00142763	-0.884654	0.236801	7.27608	0.302074	0.000761642	0.0833506	0.0107954	0.0833506	30S ribosomal protein S7	1129	1102	888	1642	1381	3630
G372_RS0111070	0.000187553	0.00142763	0.334073	0.0894387	7.53429	0.0426532	0.000497379	0.0109673	0.0115015	0.0115015	CBS domain-containing protein	2759	1943	2785	1503	1298	1471
G372_RS13660	0.000191672	0.00145487	-0.342402	0.0918031	5.96026	0.0420812	0.00254306	0.00609364	0.0100987	0.0100987	RtT sRNA	433	279	397	409	326	527
G372_RS0104865	0.000196254	0.00148545	0.334402	0.0898015	6.11547	0.0377043	0.00220263	0.00299347	0.00989383	0.00989383	ferredoxin--NADP reductase	642	507	649	381	270	394
G372_RS13790	0.000198239	0.00149207	0.517484	0.139062	4.7509	0.103543	0.00894074	0.0200666	0.0154446	0.0200666	hypothetical protein	200.901	143.86	159.255	61.6667	78.799	104.312
G372_RS0107070	0.000198053	0.00149207	0.34349	0.092299	5.97907	0.0427371	0.00270626	0.00647066	0.0100724	0.0100724	hypothetical protein	551	514	502	301	268	329
G372_RS0106025	0.000199167	0.00149487	0.422206	0.113494	5.81383	0.0689343	0.00326293	0.0160584	0.0103367	0.0160584	redox-regulated molecular chaperone Hsp33	510	376	508	275	223	234
G372_RS13895	0.000201356	0.00150709	0.530112	0.142606	4.47385	0.0935659	0.0129413	-0.00136607	0.0175637	0.0175637	hypothetical protein	136	117	128	57	45	84
G372_RS0103140	0.000202226	0.00150939	0.364524	0.09809	8.29523	0.0504941	0.000259387	0.013029	0.0141731	0.0141731	ATP-dependent zinc metalloprotease FtsH hflB	6189	4610	5372	3504	2428	3161
G372_RS0113110	0.000209397	0.00155859	-0.542409	0.146304	5.29549	0.113948	0.00502677	0.0270807	0.0119288	0.0270807	flagellar biosynthesis anti-sigma factor FlgM	148	157	207	212	242	251
G372_RS0106310	0.000212195	0.00157505	-0.545774	0.147346	4.44269	0.115414	0.0132074	0.0193587	0.0178203	0.0193587	hypothetical protein	74	76	65	89	76	147
G372_RS0108270	0.000219584	0.0016254	-0.56867	0.153888	8.49227	0.125433	0.000209754	0.0353125	0.0150206	0.0353125	cytochrome-c oxidase, cbb3-type subunit I	3831	4561	3907	5010	4778	8228
G372_RS0113175	0.000220587	0.00162835	0.336452	0.0910759	7.68651	0.0369941	0.000478791	0.00331391	0.0119634	0.0119634	flagellar hook-associated protein FlgK	2968	2448	3256	1766	1340	1908
G372_RS0111230	0.000232283	0.00170999	-0.59766	0.162362	4.07779	0.123798	0.0184285	0.00237032	0.0211135	0.0211135	glycosyltransferase family 4 protein	55	37	55	69	72	72
G372_RS0111845	0.000233466	0.001714	-0.562461	0.152853	7.64295	0.122946	0.000511132	0.0345351	0.0118277	0.0345351	30S ribosomal protein S2	1825	1911	1545	2277	1876	3573
G372_RS0103910	0.000238567	0.00174667	-0.656869	0.178777	3.84227	0.167076	0.024235	0.0228061	0.023707	0.023707	acetolactate decarboxylase	29	41	42	58	43	77
G372_RS0113230	0.000245614	0.00179338	-0.339735	0.0926519	5.90047	0.036119	0.00268918	-0.000822943	0.0101874	0.0101874	acetylornithine transaminase	394	296	345	379	334	462
G372_RS0109390	0.000251885	0.00183419	-0.496987	0.135776	5.99576	0.096221	0.00243448	0.0252183	0.0100496	0.0252183	pyridoxal phosphate-dependent aminotransferase	388	345	316	416	347	683
G372_RS0107015	0.000257791	0.00187212	0.354236	0.0969343	5.73875	0.0411877	0.00359996	0.000828511	0.0104944	0.0104944	NAD+ synthase	440	392	407	222	207	276
G372_RS0102450	0.000260868	0.00188936	0.494768	0.135503	6.27371	0.0954719	0.00183062	0.0257109	0.00972934	0.0257109	penicillin-binding protein 2	813	616	863	361	253	561
G372_RS0100140	0.0002617	0.00189029	-0.336223	0.0921026	5.8824	0.0350481	0.00250811	-0.00109033	0.0102162	0.0102162	hypothetical protein	357	294	365	370	340	438
G372_RS0110235	0.000268306	0.00193281	-0.647383	0.177651	6.1753	0.163603	0.00259367	0.0447463	0.00982398	0.0447463	hypothetical protein	346	413	405	552	414	927
G372_RS0105075	0.000271282	0.00194902	-0.364014	0.0999687	5.54891	0.0451957	0.00399248	0.00281221	0.0109981	0.0109981	cytochrome c	243	192	289	280	229	329
G372_RS0100905	0.000272375	0.00195166	0.544971	0.149707	6.16642	0.115993	0.00220211	0.0314162	0.00983381	0.0314162	30S ribosomal protein S14	660	792	646	364	271	349
G372_RS0109560	0.000276674	0.00197719	-0.311126	0.0855631	6.67561	0.0317029	0.00125059	0.00207831	0.00973098	0.00973098	hypothetical protein	842	668	766	773	693	1072
G372_RS0103395	0.000279941	0.00199523	0.38178	0.105081	5.41066	0.0501201	0.00511514	0.00287631	0.011448	0.011448	phosphatidylserine decarboxylase	328	288	289	168	128	211
G372_RS0107710	0.000292486	0.00207913	-0.426691	0.11781	4.95382	0.0635839	0.00676026	0.00444503	0.0140585	0.0140585	bifunctional 23S rRNA (guanine(2069)-N(7))-methyltransferase RlmK/23S rRNA (guanine(2445)-N(2))-methyltransferase RlmL	140	126	116	160	136	178
G372_RS0102705	0.000298004	0.00210167	-0.431417	0.119274	5.65898	0.0729078	0.00393597	0.0174034	0.010696	0.0174034	magnesium transporter	300	211	268	347	307	305
G372_RS0103260	0.000296621	0.00210167	-0.433049	0.119685	4.99828	0.0678181	0.00773539	0.00671295	0.0137514	0.0137514	hypothetical protein	149	103	151	181	147	168
G372_RS0106350	0.000297297	0.00210167	-0.590856	0.163326	4.07391	0.113206	0.0188605	-0.00826892	0.0211526	0.0211526	hypothetical protein	58	41	47	71	53	93
G372_RS0101830	0.000300659	0.00211485	-0.308587	0.0853693	6.67189	0.0333597	0.00120396	0.0047859	0.00972793	0.00972793	DUF2802 domain-containing protein	841	647	786	917	687	898
G372_RS0103405	0.000307988	0.00216074	0.399796	0.110793	5.21026	0.0559629	0.00603444	0.00398044	0.0123783	0.0123783	uracil-DNA glycosylase	277	220	252	153	112	141
G372_RS0102945	0.000315397	0.00220696	-0.634709	0.176195	6.22728	0.15811	0.00221586	0.044351	0.00977052	0.044351	hypothetical protein	494	330	423	491	479	1033
G372_RS0103360	0.000317698	0.00221555	-0.44927	0.124783	6.02159	0.079238	0.00260325	0.0207528	0.0100151	0.0207528	iron-sulfur cluster carrier protein ApbC	427	371	310	484	357	574
G372_RS0106315	0.000318274	0.00221555	-0.915197	0.254225	3.03264	0.312839	0.0599796	0.0169744	0.0369658	0.0369658	hypothetical protein	14	18	11	29	20	42
G372_RS0103365	0.000324751	0.0022548	-0.409976	0.11405	5.56414	0.0660331	0.0037691	0.015742	0.0109543	0.015742	dCTP deaminase	264	231	216	330	239	300
G372_RS0107990	0.000326929	0.00226406	0.340967	0.0948983	5.84836	0.0408443	0.00323489	0.00422357	0.0102736	0.0102736	DNA mismatch repair protein MutS	483	410	483	278	237	273
G372_RS0110625	0.000328045	0.00226596	0.312204	0.0869144	6.35424	0.0323014	0.00165628	0.00216875	0.00967489	0.00967489	bifunctional folylpolyglutamate synthase/dihydrofolate synthase	865	660	733	441	387	503
G372_RS0102950	0.000329283	0.00226867	0.367093	0.102223	5.4459	0.0459238	0.00435158	0.00251929	0.0113227	0.0113227	aminotransferase	337.211	248	355	185	148.166	188.153
G372_RS0112780	0.000335451	0.00230526	-0.3236	0.0902332	6.04045	0.0376358	0.00222275	0.00555321	0.00999028	0.00999028	malto-oligosyltrehalose synthase	470	315	424	482	365	494
G372_RS0108385	0.000344804	0.00236349	-0.30797	0.0860474	6.50609	0.0343013	0.00146313	0.0058463	0.00964309	0.00964309	serine/threonine protein kinase	739	485	726	671	606	845
G372_RS0112935	0.000346349	0.00236804	-0.335909	0.0938841	7.95154	0.039426	0.000369075	0.0066003	0.0128523	0.0128523	BAX inhibitor (BI)-1/YccA family protein	3054	2277	2748	3381	2402	3377
G372_RS0100605	0.000352	0.00239819	0.354462	0.099187	8.37576	0.0470032	0.000245752	0.0113919	0.0145113	0.0145113	DNA-directed RNA polymerase subunit beta	5913	5068	6415	3755	2723	3400
G372_RS0102505	0.000352543	0.00239819	-0.639825	0.179058	8.08192	0.161287	0.000331524	0.0477613	0.0133304	0.0477613	cytochrome b	2410	2828	2628	4882	3568	3673
G372_RS0109840	0.000377164	0.00255919	-0.591655	0.166402	6.56427	0.138245	0.00135128	0.0401834	0.00966002	0.0401834	biotin synthase BioB	605	623	537	702	679	1314
G372_RS0106945	0.00037821	0.00255982	0.348719	0.0980969	5.7119	0.0442784	0.0038756	0.00587066	0.0105589	0.0105589	PhoH family protein	456	363	388	215	177	310
G372_RS0102160	0.000383891	0.00259175	0.476008	0.134052	7.27565	0.089539	0.000789737	0.0261652	0.0107943	0.0261652	DUF3501 domain-containing protein	2315	1817	2021	1238	897	961
G372_RS0107080	0.000392867	0.0026457	-0.31439	0.0886898	6.20332	0.0390693	0.00200457	0.00976658	0.00979425	0.00979425	protein-export chaperone SecB	496	459	456	505	396	699
G372_RS0103335	0.000404141	0.00271482	0.421783	0.119236	5.00077	0.0576826	0.00759175	-0.00220133	0.0137342	0.0137342	electron transport complex subunit RsxB	240	177	199	114	88	124
G372_RS0112555	0.000411478	0.00275721	-0.539371	0.152683	5.74159	0.115251	0.00331309	0.0316552	0.0104879	0.0316552	DNA helicase RecQ	283	278	235	291	347	485
G372_RS14095	0.000414267	0.00276899	0.692354	0.196088	3.95008	0.189947	0.0243321	0.0333439	0.0224629	0.0333439	hypothetical protein	103	80	65	27	25	51
G372_RS0107165	0.000419086	0.00279425	-0.419987	0.119052	4.95137	0.0574744	0.00718473	-0.00148778	0.0140753	0.0140753	GTPase ObgE	139	121	122	147	137	189
G372_RS0101245	0.000425995	0.00283329	-0.388371	0.110225	6.34992	0.0598291	0.00171809	0.0165063	0.00967722	0.0165063	1,4-alpha-glucan branching protein GlgB	499	449	644	624	599	649
G372_RS0100775	0.000431161	0.00286056	-0.805911	0.228937	4.33256	0.257742	0.0149824	0.0636356	0.0187558	0.0636356	hypothetical protein	63	55	51	83	68	187
G372_RS0101005	0.000437527	0.00289008	-0.368548	0.10481	5.31337	0.0514037	0.00463208	0.00868714	0.0118456	0.0118456	hypothetical protein	178	189	196	206	204	249
G372_RS0110650	0.000437761	0.00289008	-0.482442	0.137205	4.51178	0.0906791	0.0109818	0.0150856	0.0172562	0.0172562	tRNA pseudouridine(38-40) synthase TruA	102	60	81	90	83	149
G372_RS0106910	0.000446006	0.0029373	-0.300012	0.085443	6.75932	0.0340124	0.0011387	0.00762419	0.00981205	0.00981205	leucine--tRNA ligase	903	809	771	847	785	1092
G372_RS13915	0.000459261	0.0030172	-0.350622	0.100079	5.77093	0.0488996	0.00358708	0.0114366	0.010423	0.0114366	cytochrome c	360	279	267	368	267	410
G372_RS0101330	0.000469342	0.00307591	0.300754	0.0859869	6.87914	0.0317645	0.00112261	0.00466329	0.009968	0.009968	dTDP-glucose 4,6-dehydratase	1261	1190	1325	794	640	831
G372_RS0104335	0.000472104	0.00308648	-0.47547	0.136	4.52462	0.0830996	0.0105907	0.008507	0.0171533	0.0171533	cation transporter	73	82	87	92	95	131
G372_RS0100370	0.000480419	0.00312005	0.463142	0.13265	7.72995	0.0854654	0.000431322	0.0259629	0.0121017	0.0259629	glutamate synthase large subunit	3545	2645	3476	2033	1336	1566
G372_RS0101535	0.000479537	0.00312005	0.496107	0.142072	4.50777	0.0802366	0.0129884	-0.00498847	0.0172884	0.0172884	alanine racemase	153	103	136	66	56	68
G372_RS0102460	0.000480723	0.00312005	0.604048	0.173017	5.55346	0.145384	0.00460961	0.0402925	0.0109849	0.0402925	16S rRNA (cytosine(1402)-N(4))-methyltransferase RsmH	387	334	453	152	116	283
G372_RS0105065	0.000490861	0.00317818	0.314832	0.0903211	6.09558	0.0357694	0.00231809	0.00522399	0.00991877	0.00991877	membrane-bound lytic murein transglycosylase MltF	655	524	563	353	306	364
G372_RS0102995	0.000501276	0.00323781	0.299521	0.0860673	6.71052	0.0284319	0.00134942	0.000548277	0.00976195	0.00976195	class I SAM-dependent methyltransferase	1203	900	1105	635	557	721
G372_RS0105000	0.000528295	0.00340415	0.507054	0.146294	7.17971	0.102813	0.000759714	0.0313433	0.010556	0.0313433	hypothetical protein	2156	1764	1756	1170	708	922
G372_RS0111730	0.000532662	0.00342407	0.446315	0.128852	4.76777	0.0722626	0.00957927	0.0060501	0.0153251	0.0153251	hypothetical protein	196	147	151	93	62	103
G372_RS0100690	0.000563642	0.00360597	0.336934	0.0977035	6.06648	0.0455124	0.00217339	0.0121456	0.00995637	0.0121456	nitrogen regulation protein NR(I)	704	418	622	301	277	418
G372_RS0113155	0.000563329	0.00360597	0.379696	0.110099	6.86079	0.0577967	0.00110261	0.01708	0.00994113	0.01708	flagellar basal-body rod protein FlgG	1161	1134	1609	746	618	770
G372_RS0109665	0.000584757	0.00373217	-0.353684	0.102857	5.40907	0.0404237	0.00441561	-0.000795715	0.0114539	0.0114539	phosphoglycerate mutase	227	173	229	228	220	272
G372_RS0100995	0.000610841	0.00388941	-0.346438	0.101098	5.47374	0.0422426	0.00410178	0.00369424	0.0112294	0.0112294	acyl carrier protein	249	198	224	265	188	329
G372_RS13965	0.000622023	0.00395124	0.48899	0.142903	4.92638	0.096239	0.00856929	0.0220627	0.0142468	0.0220627	hypothetical protein	265.643	135.38	207.892	90.4046	77.0036	129.053
G372_RS0103010	0.000636813	0.00403565	0.78062	0.228557	4.66702	0.245496	0.0123667	0.0659907	0.0160548	0.0659907	tRNA pseudouridine(55) synthase TruB	230	140	165	53	43	116
G372_RS0104545	0.000682029	0.00431203	-0.355973	0.1048	5.37091	0.0409288	0.00487398	-0.00123183	0.0116005	0.0116005	phospholipase D family protein	230	180	193	230	193	275
G372_RS0101335	0.000715706	0.00451432	0.315018	0.0931044	7.8856	0.0375841	0.000381787	0.00938474	0.0126209	0.0126209	DUF616 domain-containing protein	3538	3138	3750	2337	1649	2199
G372_RS0107450	0.000728233	0.00458258	-0.332512	0.0984136	8.32375	0.0427176	0.00023624	0.011699	0.0142916	0.0142916	4Fe-4S dicluster domain-containing protein	4047	3879	3738	4615	3316	5447
G372_RS0106015	0.0007487	0.00470037	-0.556201	0.164991	5.68635	0.125474	0.0035112	0.0373219	0.0106244	0.0373219	Asp-tRNA(Asn)/Glu-tRNA(Gln) amidotransferase subunit GatA	262	259	225	314	250	542
G372_RS0101485	0.000758977	0.00473698	0.367214	0.109052	6.82485	0.0547246	0.00115969	0.0166787	0.00989161	0.0166787	adenylosuccinate synthase	1484	999	1259	763	624	682
G372_RS0106575	0.00075982	0.00473698	-0.336546	0.0999534	5.54426	0.0408192	0.00397433	0.00457588	0.0110117	0.0110117	ATP-dependent zinc metalloprotease FtsH	273	193	263	239	232	360
G372_RS0107330	0.000757991	0.00473698	-0.289314	0.0859087	6.86112	0.0296511	0.00112887	0.00454648	0.00994159	0.00994159	inorganic diphosphatase	989	869	904	967	786	1276
G372_RS0109760	0.000777571	0.00483642	0.314406	0.0935548	6.50515	0.0401583	0.00139727	0.0117315	0.00964296	0.0117315	two-component sensor histidine kinase	979	720	937	605	409	544
G372_RS0112680	0.000791868	0.00491397	-0.409829	0.122132	9.77561	0.0617123	6.20778e-05	0.0140934	0.0223123	0.0223123	ribulose-bisphosphate carboxylase large subunit rbcL	15657	14729	17660	17637	15080	27428
G372_RS0107130	0.000800553	0.00495642	-0.317543	0.0947153	7.26464	0.0410153	0.000693646	0.0127628	0.0107663	0.0127628	DUF3617 domain-containing protein	1430	1179	1483	1683	1349	1496
G372_RS0104085	0.000806203	0.00497993	-0.304433	0.0908578	6.0434	0.0341152	0.00239628	0.00549286	0.00998642	0.00998642	anthranilate phosphoribosyltransferase	479	324	420	433	341	577
G372_RS0103950	0.000811579	0.00500163	-0.329834	0.0984926	6.11448	0.044278	0.00228968	0.0122615	0.00989506	0.0122615	membrane protein	516	385	391	444	382	646
G372_RS13720	0.00082672	0.00508329	0.406287	0.121509	4.84222	0.0610975	0.00733495	0.00713601	0.0148115	0.0148115	hypothetical protein	221.948	131.721	175.305	92.0492	72.8697	117.727
G372_RS0105260	0.000839406	0.00514951	-0.295302	0.0884279	6.20337	0.0346231	0.00193503	0.00864268	0.0097942	0.0097942	oxaloacetate decarboxylase subunit alpha	574	365	510	527	462	558
G372_RS0108255	0.000841379	0.00514985	0.347074	0.103951	8.7089	0.0397478	0.000177182	0.0043348	0.0160317	0.0160317	cytochrome-c oxidase, cbb3-type subunit III	7847	7225	9111	4708	3832	5294
G372_RS0104735	0.000848079	0.00516732	-0.489749	0.14678	5.93932	0.0978095	0.00262794	0.0296888	0.0101287	0.0296888	aspartate--tRNA ligase	370	323	302	378	327	666
G372_RS0109780	0.000847849	0.00516732	0.295976	0.0887037	6.52757	0.0357226	0.00158046	0.0102221	0.00964728	0.0102221	peptide deformylase	851	814	992	600	421	586
G372_RS0110365	0.000862611	0.00524397	-0.286451	0.0859726	6.56057	0.028126	0.00142853	0.00295871	0.00965841	0.00965841	M3 family peptidase	774	597	685	678	607	952
G372_RS13735	0.000872125	0.00528984	0.319933	0.0961097	5.86664	0.0417916	0.00306103	0.0107946	0.0102423	0.0107946	glyoxalase/bleomycin resistance/dioxygenase family protein	573.312	383.786	444.957	264.616	204.901	361.728
G372_RS0107175	0.00088252	0.00534083	-0.825738	0.248303	5.47238	0.278538	0.0044412	0.0880404	0.0112339	0.0880404	50S ribosomal protein L21	189	205	138	263	231	552
G372_RS0102040	0.000895826	0.00540918	0.305886	0.092097	5.96265	0.0335663	0.0026275	0.00424293	0.0100953	0.0100953	hypothetical protein	551	416	558	318	266	316
G372_RS0112735	0.00089988	0.00542147	0.440712	0.132741	7.12156	0.0794122	0.000853575	0.0255766	0.010421	0.0255766	chromosome partitioning protein ParA	1477	1569	2191	973	750	971
G372_RS0105655	0.000903233	0.0054295	-0.319895	0.0963813	5.99785	0.041847	0.00264734	0.0112867	0.0100468	0.0112867	folate-binding protein	426	379	344	388	365	537
G372_RS0107885	0.000920149	0.00551884	0.287189	0.0866628	6.75096	0.0337558	0.00130705	0.00995862	0.00980291	0.00995862	hypothetical protein	1355	897	1091	647	514	882
G372_RS0105070	0.000956208	0.00572234	-0.281482	0.0852173	6.85739	0.0297753	0.000956722	0.0065504	0.00993627	0.00993627	restriction endonuclease subunit R	1068	706	1031	1009	854	1100
G372_RS0106135	0.000965657	0.00576604	0.280826	0.08509	6.6405	0.0281986	0.00115647	0.00451794	0.00970399	0.00970399	PAS domain S-box protein	947	881	1130	591	486	740
G372_RS0108315	0.000976494	0.00581783	-0.719704	0.218277	7.39485	0.212566	0.000623172	0.0708438	0.0111083	0.0708438	hypothetical protein	1291	1352	1158	1594	1588	3626
G372_RS0110465	0.000983813	0.00584847	0.469417	0.142458	5.97475	0.090459	0.00298151	0.0274601	0.0100784	0.0274601	Zn-dependent hydrolase	681	430	579	234	218	425
G372_RS0105840	0.000989029	0.00586649	-0.456198	0.138509	6.06767	0.0854566	0.00230073	0.0264764	0.00995483	0.0264764	peptidylprolyl isomerase	382	426	343	538	382	560
G372_RS0110660	0.00100171	0.00592865	-0.344193	0.104616	8.75689	0.0394576	0.000149707	0.00474654	0.0162672	0.0162672	hypothetical protein	6680	4714	6716	6437	6085	7943
G372_RS0102470	0.00103885	0.00613491	-0.510831	0.155751	4.23229	0.0874508	0.0167425	-0.00528451	0.0196451	0.0196451	16S rRNA (cytidine(1402)-2'-O)-methyltransferase	69.4817	55.778	52.6158	76.465	68.678	95.2599
G372_RS0103900	0.00104705	0.00615632	-0.327694	0.0999808	5.56774	0.0371441	0.00405022	0.00211114	0.010944	0.010944	glutathione S-transferase family protein	264	201	284	252	233	360
G372_RS0113245	0.00104666	0.00615632	-0.285801	0.0871962	7.25126	0.0330284	0.00067227	0.0099824	0.0107325	0.0107325	methyl-accepting chemotaxis protein	1404	1347	1332	1550	1276	1573
G372_RS0103845	0.00107031	0.0062793	-0.32937	0.100683	5.51418	0.0422872	0.00410387	0.00807346	0.0111016	0.0111016	30S ribosomal protein S6--L-glutamate ligase	264	185	262	288	232	270
G372_RS0110370	0.00108167	0.00631834	0.312987	0.0957622	5.71129	0.0347124	0.00319521	0.00345995	0.0105604	0.0105604	exodeoxyribonuclease III	465	306	427	228	186	293
G372_RS14105	0.00107949	0.00631834	0.594834	0.181965	4.74603	0.145882	0.00948724	0.0401797	0.0154792	0.0401797	Txe/YoeB family addiction module toxin	163	154	203	92	46	105
G372_RS0113040	0.00109129	0.00636071	0.340751	0.104337	5.40483	0.0418811	0.00485971	0.00395005	0.0114696	0.0114696	serine/threonine protein kinase	337	252	297	145	155	211
G372_RS0100850	0.00111155	0.00646477	-0.290788	0.0891809	7.49333	0.0341565	0.000546742	0.0104397	0.0113831	0.0113831	30S ribosomal protein S4	1812	1612	1770	1802	1394	2580
G372_RS0105025	0.00112167	0.00650959	-0.327546	0.100533	5.52162	0.0425464	0.00408138	0.00886931	0.011079	0.011079	pyruvate kinase	238	185	298	252	216	338
G372_RS0109340	0.00112596	0.0065204	-0.313591	0.0962821	5.71961	0.0363108	0.00336548	0.00514586	0.0105399	0.0105399	pilus biogenesis protein PilZ	347	244	287	343	276	345
G372_RS0104580	0.00113421	0.00653994	-0.41108	0.126295	4.75012	0.0668961	0.00847539	0.0117747	0.0154501	0.0154501	restriction endonuclease	102	95	117	140	119	123
G372_RS0109565	0.00113389	0.00653994	0.588316	0.180742	7.24959	0.143036	0.000802347	0.048199	0.0107283	0.048199	aminopeptidase N	2280	1741	2344	1280	782	833
G372_RS0111220	0.00115169	0.00662654	-0.410624	0.126323	4.75762	0.0557217	0.00853946	-0.00211672	0.0153968	0.0153968	asparagine synthase	109	91	117	125	98	171
G372_RS0106565	0.00115815	0.00664948	-0.430693	0.132562	4.56265	0.0751621	0.00950681	0.0148845	0.0168523	0.0168523	cold-shock protein	74	82	103	114	94	112
G372_RS0104960	0.00116903	0.00668335	0.336767	0.103738	5.39614	0.0431199	0.00464001	0.00673039	0.0115023	0.0115023	hypothetical protein	286	244	350	159	158	185
G372_RS0108850	0.0011681	0.00668335	-0.550463	0.169553	5.02513	0.125401	0.00732885	0.0357935	0.0135665	0.0357935	tRNA-Asp	106	146	136	176	172	191
G372_RS0101450	0.00118183	0.00674223	0.280575	0.086511	6.63735	0.0268825	0.00152445	0.00255784	0.00970177	0.00970177	GTPase Era	1114	781	1073	596	475	744
G372_RS0111970	0.0011997	0.00682967	-0.282627	0.087259	7.18655	0.0319089	0.000848611	0.00908311	0.0105726	0.0105726	CTP synthase pyrG	1431	1169	1246	1285	1060	1872
G372_RS0112420	0.00121077	0.0068781	-0.346616	0.107102	6.19909	0.0498077	0.00211349	0.0150926	0.00979861	0.0150926	CBS domain-containing protein	471	444	467	600	459	526
G372_RS0110115	0.0012155	0.00689041	0.67353	0.208187	9.78511	0.188103	6.26277e-05	0.06495	0.0223784	0.06495	cold-shock protein	37236	18132	31521	9690	8371	18219
G372_RS0108130	0.00121856	0.00689319	-0.763704	0.236112	5.73999	0.241872	0.00331444	0.0803088	0.0104915	0.0803088	glutamate--tRNA ligase	275	250	191	298	331	692
G372_RS0106115	0.00122886	0.00693686	0.345556	0.106914	7.42298	0.0495394	0.00064294	0.0165029	0.0111854	0.0165029	dihydrolipoyllysine-residue acetyltransferase	2359.64	1738	2652	1437	1087	1293
G372_RS0103915	0.00125911	0.00709274	-0.97835	0.303351	5.87027	0.397577	0.00327739	0.134756	0.0102362	0.134756	hypothetical protein	209	194	347	853	307	532
G372_RS0108595	0.00126273	0.00709822	-0.573905	0.177993	6.96572	0.136828	0.000961345	0.0465607	0.0101091	0.0465607	class 1 fructose-bisphosphatase	961	973	742	1108	964	1905
G372_RS0111565	0.00128809	0.00722566	0.33955	0.105496	5.35165	0.0414893	0.0050149	0.00361125	0.0116791	0.0116791	tRNA (guanosine(46)-N7)-methyltransferase TrmB	308	233	299	180	119	189
G372_RS0102570	0.00130029	0.00727892	-0.275146	0.0855575	6.77546	0.0301469	0.00114978	0.00814437	0.00983035	0.00983035	glycine cleavage system protein H	1012	633	958	897	770	1063
G372_RS0107290	0.00130622	0.00729691	0.305025	0.094887	5.7605	0.0341901	0.00305983	0.00478778	0.0104455	0.0104455	symmetrical bis(5'-nucleosyl)-tetraphosphatase	494	365	386	254	205	280
G372_RS0101345	0.0013124	0.00731621	0.330083	0.102726	6.08439	0.0453496	0.00227617	0.0135526	0.00993313	0.0135526	hypothetical protein	610	533	588	390	237	402
G372_RS0103035	0.00132379	0.00736444	0.722195	0.224929	3.36372	0.193239	0.0452949	0.000667008	0.0305945	0.0305945	tRNA-Met	46	48	43	18	19	16
G372_RS0104990	0.001336	0.00741703	0.312131	0.0972936	5.64921	0.0344515	0.00347737	0.00305235	0.0107217	0.0107217	class I SAM-dependent methyltransferase	406	307	404	229	196	230
G372_RS0109795	0.00134175	0.00743355	0.291085	0.0907683	6.08471	0.0302286	0.00242562	0.00358625	0.00993271	0.00993271	DUF494 domain-containing protein	635	449	633	367	270	398
G372_RS0113125	0.0013533	0.00748215	-0.291747	0.0910449	6.04223	0.031682	0.00244582	0.00523807	0.00998795	0.00998795	protein-glutamate O-methyltransferase CheR	406	374	436	413	343	588
G372_RS0112650	0.00140714	0.00776384	-0.325934	0.102072	5.84914	0.0443722	0.00297685	0.0126511	0.0102723	0.0126511	hypothetical protein	387	252	361	363	355	381
G372_RS0108820	0.00141635	0.00779862	-0.284792	0.0892402	7.39854	0.0338885	0.000698278	0.0112474	0.0111184	0.0112474	trigger factor	1859	1488	1419	1632	1378	2149
G372_RS0107555	0.00146841	0.00806875	0.469517	0.147607	4.71608	0.0922795	0.0106809	0.022001	0.0156945	0.022001	acetoin utilization protein AcuC	159	129	188	96	70	73
G372_RS0106585	0.00147969	0.00811413	0.30112	0.0947325	5.77042	0.0316973	0.00303727	0.00258174	0.0104241	0.0104241	ABC transporter permease	504	340	416	251	202	298
G372_RS0100350	0.00148665	0.00813573	-0.50856	0.160062	6.17352	0.108334	0.00215639	0.0362732	0.00982594	0.0362732	heavy metal translocating P-type ATPase	345	371	554	475	516	698
G372_RS0103155	0.00151314	0.0082471	0.272625	0.0859433	7.04508	0.0311608	0.000775436	0.0103039	0.0102587	0.0103039	transcription elongation factor GreA	1812	1099	1575	937	741	1044
G372_RS0108935	0.00151185	0.0082471	0.355391	0.112026	5.21323	0.0529506	0.00533412	0.0134906	0.0123613	0.0134906	biopolymer transporter ExbD	298	193	252	142	133	138
G372_RS0100875	0.00152282	0.00828305	0.481318	0.151821	7.41548	0.0971597	0.000650796	0.0339236	0.0111647	0.0339236	50S ribosomal protein L15	2076	2226	2821	1382	1026	1136
G372_RS0101545	0.0015484	0.00840514	0.431905	0.136443	4.66812	0.0783027	0.00913529	0.0187898	0.0160467	0.0187898	PIN domain-containing protein	145	145	150	96	60	78
G372_RS0104190	0.00156213	0.00846259	-0.909172	0.28745	4.73048	0.347131	0.0109206	0.113021	0.0155906	0.113021	succinyldiaminopimelate transaminase	101	89	56	134	107	285
G372_RS0108690	0.00159103	0.00860183	-0.530855	0.168123	5.72532	0.11846	0.00323626	0.0391616	0.0105261	0.0391616	ribose-5-phosphate isomerase RpiA	284	273	230	287	296	542
G372_RS0106605	0.00160996	0.00868669	0.322193	0.102151	5.43219	0.0391536	0.00428175	0.00573212	0.0113704	0.0113704	YbhB/YbcL family Raf kinase inhibitor-like protein	300	269	330	185	159	180
G372_RS0110870	0.00162964	0.00877526	-0.316783	0.100548	5.60305	0.0422374	0.00373874	0.0114262	0.0108456	0.0114262	Crp/Fnr family transcriptional regulator	287	209	284	266	212	410
G372_RS0105530	0.00163874	0.00880658	0.295118	0.0937202	5.858	0.0365789	0.00291827	0.0101449	0.0102569	0.0102569	glutathione-disulfide reductase	504	348	524	300	232	285
G372_RS0100880	0.00165795	0.00889202	0.464023	0.147519	5.55123	0.0907095	0.00411181	0.028531	0.0109914	0.028531	50S ribosomal protein L30	302	346	451	203	157	192
G372_RS0110505	0.00167149	0.00894679	0.397388	0.126431	5.89562	0.0665568	0.00268729	0.0212897	0.010195	0.0212897	endonuclease	658	352	518	252	247	306
G372_RS0111670	0.00168621	0.00900763	0.442849	0.141009	5.55666	0.0826949	0.00435528	0.0254701	0.0109757	0.0254701	alpha-L-glutamate ligase-like protein	428	260	417	215	165	181
G372_RS0102750	0.00168988	0.00900934	-1.11687	0.3557	6.11451	0.526048	0.00233526	0.187448	0.00989502	0.187448	30S ribosomal protein S20	326	335	218	499	459	1559
G372_RS13695	0.00172886	0.0091989	-0.692881	0.221139	5.18504	0.202708	0.00595303	0.0674004	0.0125259	0.0674004	hypothetical protein	164.715	96.1364	173.649	161.133	193.818	370.855
G372_RS0101135	0.0017588	0.0093213	-1.00503	0.32128	2.34755	0.380451	0.0988287	-0.00204667	0.0560028	0.0560028	hypothetical protein	6	9	5	18	10	19
G372_RS0111480	0.00175783	0.0093213	0.309926	0.0990696	5.62069	0.036209	0.00392442	0.00531656	0.0107978	0.0107978	cytochrome c biogenesis protein	388	291	408	240	170	233
G372_RS0102395	0.00179935	0.00951741	0.373555	0.119672	6.33752	0.0590487	0.00191524	0.0195668	0.00968428	0.0195668	cell division protein FtsA	844	533	970	443	343	490
G372_RS0104950	0.00183184	0.00967024	0.438929	0.140853	4.49102	0.0629967	0.0123355	-0.00583664	0.0174238	0.0174238	TetR/AcrR family transcriptional regulator	128	109	134	61	61	70
G372_RS0100645	0.00184421	0.00970454	-0.486107	0.156092	5.72264	0.100128	0.00333201	0.033215	0.0105325	0.033215	YihA family ribosome biogenesis GTP-binding protein	280	290	233	331	256	504
G372_RS0105380	0.00184556	0.00970454	-0.527714	0.169464	4.44067	0.118006	0.0132123	0.0298647	0.017837	0.0298647	hypothetical protein	87	78	55	95	81	125
G372_RS0101410	0.00185761	0.00972981	0.270434	0.0868977	7.11823	0.0244222	0.000913253	0.00218898	0.0104136	0.0104136	hypothetical protein	1728	1359	1658	999	857	1058
G372_RS0101725	0.00185616	0.00972981	0.269943	0.0867334	7.16748	0.0233884	0.000757217	0.00115229	0.0105268	0.0105268	prephenate dehydratase	1827	1352	1826	1019	829	1244
G372_RS0105475	0.00193687	0.0101252	0.315192	0.101683	5.96532	0.0422112	0.00249973	0.0130095	0.0100915	0.0130095	MarR family EPS-associated transcriptional regulator	592	463	477	271	234	419
G372_RS0106680	0.00194324	0.0101388	-0.418708	0.135121	4.57028	0.074504	0.00993719	0.0174492	0.0167926	0.0174492	RtcB family protein	103	58	109	110	85	129
G372_RS0109315	0.00196807	0.0102484	0.297943	0.0962657	6.56288	0.0377516	0.0014965	0.0124041	0.00965941	0.0124041	hypothetical protein	1086	844	836	609	436	618
G372_RS0112535	0.00197675	0.0102738	0.581554	0.18798	5.03917	0.143865	0.00746329	0.0455413	0.0134703	0.0455413	ISC system 2Fe-2S type ferredoxin	275	195	225	142	84	92
G372_RS0106010	0.00202567	0.0105077	-0.578101	0.187303	3.69074	0.142359	0.0242697	0.028354	0.0256328	0.028354	Asp-tRNA(Asn)/Glu-tRNA(Gln) amidotransferase subunit GatC	35	29	35	47	29	79
G372_RS0101240	0.00204236	0.0105573	-0.376658	0.122133	7.59543	0.0604609	0.000555349	0.0218192	0.0116829	0.0218192	glucose-1-phosphate adenylyltransferase	1957	1393	2265	2286	2032	2156
G372_RS0102855	0.00205087	0.0105573	-0.27086	0.0878628	6.27444	0.0276092	0.00185105	0.00514839	0.00972875	0.00972875	hypothetical protein	573	437	548	489	448	740
G372_RS0103455	0.00205095	0.0105573	-0.264945	0.0859442	6.53862	0.0235508	0.00142924	0.00168585	0.00965037	0.00965037	aspartate carbamoyltransferase catalytic subunit	785	540	722	703	600	842
G372_RS0111245	0.00204923	0.0105573	-0.374678	0.12153	4.90626	0.0580582	0.00777099	0.0121578	0.0143834	0.0143834	amidotransferase 1, exosortase A system-associated	150	94	136	168	124	149
G372_RS0112580	0.00206021	0.0105847	-0.409412	0.132865	4.6705	0.0591657	0.0104508	0.000649361	0.0160289	0.0160289	hypothetical protein	108	89	93	128	103	122
G372_RS0101015	0.00208595	0.0106965	0.388802	0.126328	4.80492	0.0607601	0.00887202	0.0103906	0.0150661	0.0150661	lipid A biosynthesis acyltransferase	179	152	164	92	62	127
G372_RS0101000	0.00211346	0.0108169	-0.328362	0.106826	5.25197	0.0382261	0.00496954	0.00238008	0.0121481	0.0121481	hypothetical protein	211	143	193	181	181	250
G372_RS0110375	0.00212081	0.0108338	0.266124	0.086607	6.50178	0.0236627	0.00160862	0.00141162	0.00964253	0.00964253	4-hydroxy-3-polyprenylbenzoate decarboxylase	891	780	875	495	432	670
G372_RS0109190	0.00221179	0.0112772	-0.495924	0.162055	6.36048	0.105297	0.00187445	0.0375185	0.00967166	0.0375185	alanine transaminase	524	507	477	549	509	1053
G372_RS0103785	0.00228516	0.0116292	-0.287856	0.0943658	5.84809	0.0288197	0.00308324	0.00186844	0.0102741	0.0102741	PAS domain S-box protein	354	323	325	350	305	433
G372_RS14025	0.0022902	0.0116328	2.41378	0.791465	1.24857	2.39448	0.826367	-0.0181508	0.113258	0.113258	glyoxalase/bleomycin resistance/dioxygenase family protein	12.9943	11.062	13.3307	3.57735	0.000733464	1.68e-07
G372_RS0102280	0.00231455	0.0117343	0.303941	0.0997644	5.64922	0.0337861	0.00420773	0.00338235	0.0107217	0.0107217	hypothetical protein	393	343	369	244	177	242
G372_RS0104440	0.00231933	0.0117364	0.261439	0.0858313	6.52378	0.0246424	0.00140416	0.00376737	0.00964637	0.00964637	flagellar hook-length control protein FliK	857	794	948	494	483	646
G372_RS0105325	0.00240944	0.0121695	-0.27762	0.0914883	6.01197	0.0302043	0.00252731	0.00632575	0.0100279	0.0100279	glycerate kinase	463	308	433	404	393	469
G372_RS0102920	0.00245203	0.0123552	0.305019	0.100693	8.47982	0.0325393	0.000243535	0.00554188	0.014965	0.014965	CBS domain-containing protein	7240	5005	6731	3400	3154	4771
G372_RS0111590	0.0024554	0.0123552	0.268659	0.0887018	6.24575	0.0278218	0.00204867	0.00566208	0.00975335	0.00975335	isochorismatase	757	603	620	370	352	508
G372_RS0100255	0.0024616	0.0123632	-0.261561	0.0863802	7.07705	0.0294154	0.000867906	0.0102461	0.0103244	0.0103244	hypothetical protein	1224	1001	1264	1013	1098	1599
G372_RS0103615	0.00248309	0.0124479	0.294054	0.0971953	5.66388	0.0303385	0.00348729	0.00201043	0.0106831	0.0106831	malate dehydrogenase	420	335	364	233	195	244
G372_RS0102110	0.00248916	0.0124551	1.70764	0.564572	10.4532	1.25729	6.19442e-05	0.47805	0.0274866	0.47805	sulfur oxidation c-type cytochrome SoxA	92212	73458	109962	4574	13578	37429
G372_RS0111005	0.00250328	0.0125024	-0.301986	0.099898	5.53249	0.0359079	0.003923	0.00676345	0.0110464	0.0110464	cytochrome c4	277	181	281	281	210	310
G372_RS0107355	0.00250799	0.0125027	-0.258658	0.0855809	6.9372	0.0244939	0.000926134	0.00460232	0.01006	0.01006	D-alanyl-D-alanine carboxypeptidase	1170	812	1076	1134	861	1192
G372_RS0102565	0.00257461	0.0128111	-0.37023	0.122819	6.94693	0.0592224	0.00108249	0.0215443	0.0100764	0.0215443	glycine cleavage system protein T	1133	667	1178	1210	887	1320
G372_RS0112540	0.00259196	0.0128736	0.649244	0.215524	4.35117	0.182196	0.01566	0.054016	0.0185946	0.054016	Fe-S assembly protein IscX	135	99	126	76	34	48
G372_RS0107970	0.00259875	0.0128835	-0.352859	0.117167	5.05172	0.0387146	0.00720729	-0.00550514	0.0133848	0.0133848	glutathione S-transferase	155	133	149	166	146	192
G372_RS0113350	0.00261696	0.0129498	0.316417	0.10514	5.36213	0.0383445	0.00494576	0.00543989	0.0116359	0.0116359	DUF255 domain-containing protein	326	213	308	159	152	179
G372_RS0102775	0.00262682	0.0129748	0.272463	0.0905695	6.04827	0.0305206	0.00232418	0.00798797	0.00998006	0.00998006	ubiquinone biosynthesis regulatory protein kinase UbiB	577	542	503	324	271	414
G372_RS0102105	0.00264903	0.0130604	1.62516	0.540679	10.4812	1.14314	5.02902e-05	0.43845	0.0277207	0.43845	sulfur oxidation c-type cytochrome SoxX	90051	73003	108905	5133	14414	38677
G372_RS0110435	0.00266643	0.0131221	0.356678	0.118743	5.30994	0.0550855	0.00489451	0.0162553	0.0118612	0.0162553	rhomboid family intramembrane serine protease	292	241	276	131	116	229
G372_RS0100675	0.00268334	0.0131572	0.282744	0.0941895	5.88701	0.0259657	0.00309872	-0.000620634	0.0102088	0.0102088	hypothetical protein	489	405	497	270	256	319
G372_RS0101210	0.00268122	0.0131572	0.304907	0.101564	8.54562	0.0400003	0.000211241	0.014926	0.0152618	0.0152618	class I SAM-dependent methyltransferase	7528	6149	6418	3728	2977	5617
G372_RS0102355	0.0027532	0.0134751	-0.300648	0.100416	5.90656	0.0392169	0.00278586	0.0123392	0.0101779	0.0123392	cell division protein ZapD	401	307	353	327	314	547
G372_RS0102695	0.00277072	0.0135362	0.398352	0.133135	8.68018	0.0688752	0.000199671	0.0263877	0.0158927	0.0263877	prepilin-type cleavage/methylation domain-containing protein	10674	6736	7118	4213	3273	5884
G372_RS0108675	0.00277861	0.0135501	0.486658	0.162695	7.63822	0.102814	0.000552836	0.0391517	0.0118132	0.0391517	FAD-linked oxidase	3198	2646	3030	1928	1215	1331
G372_RS0101180	0.00280077	0.0136335	-0.613829	0.205377	5.76758	0.163651	0.00363025	0.059639	0.0104302	0.059639	acetylglutamate kinase	317	233	242	304	286	681
G372_RS0105045	0.00281022	0.0136547	-0.412586	0.138092	4.48281	0.0540313	0.0111135	-0.00740956	0.0174905	0.0174905	hypothetical protein	90	71	79	94	88	111
G372_RS0104860	0.00290303	0.0140802	-0.266162	0.0893815	6.18757	0.0235575	0.00217286	0.000708138	0.00981071	0.00981071	GGDEF domain-containing protein	495	412	522	488	453	561
G372_RS0100785	0.00290911	0.0140843	-0.433206	0.145509	4.39781	0.0642264	0.0135631	-0.00365554	0.0181961	0.0181961	YcgN family cysteine cluster protein	83	60	76	77	80	119
G372_RS0105135	0.00291756	0.0140998	-0.328045	0.110219	5.21675	0.036295	0.00588113	-0.000867389	0.0123413	0.0123413	DNA mismatch repair protein MutS	197	152	175	188	153	256
G372_RS0109505	0.00294392	0.0142016	-0.286172	0.0962395	6.12373	0.0356827	0.00205497	0.0118381	0.00988371	0.0118381	orotidine-5'-phosphate decarboxylase	475	382	470	550	403	476
G372_RS0100585	0.00297098	0.0143065	-0.31333	0.105473	8.81111	0.0338645	0.000148306	0.00536645	0.0165384	0.0165384	elongation factor G	6927	5793	6495	7773	5739	7835
G372_RS0107285	0.00299275	0.0143855	0.254514	0.0857386	6.95339	0.0257935	0.000939137	0.00701133	0.0100875	0.0100875	metalloprotease PmbA	1511	1058	1450	920	669	919
G372_RS0109450	0.00304676	0.014619	-0.422969	0.142751	4.38474	0.0695809	0.0122599	0.00762754	0.018307	0.018307	hypothetical protein	78	74	64	98	73	97
G372_RS0100045	0.00306401	0.0146756	-0.926087	0.312736	6.43525	0.374656	0.00170233	0.145004	0.00964523	0.145004	translational GTPase TypA	554	445.297	337	723	537	1809
G372_RS0102730	0.00313035	0.0149401	0.565974	0.191554	5.30068	0.14013	0.00572837	0.0493112	0.0119043	0.0493112	protein-methionine-sulfoxide reductase catalytic subunit MsrP	426	184	330	118	121	173
G372_RS0112445	0.00312772	0.0149401	-0.434719	0.147118	4.44949	0.0826666	0.013044	0.0194215	0.0177639	0.0194215	class I SAM-dependent methyltransferase	80	62	89	74	80	145
G372_RS0104065	0.00315895	0.0150498	-0.365344	0.123769	5.70988	0.0584252	0.00314124	0.0198367	0.0105639	0.0198367	adenosylmethionine decarboxylase	310	248	284	291	238	495
G372_RS0100515	0.0031796	0.0151214	0.363667	0.123284	4.91883	0.0416564	0.00850039	-0.00602502	0.0142982	0.0142982	hypothetical protein	199	156	195	98	82	132
G372_RS0110250	0.00319047	0.0151463	0.58861	0.199612	6.9764	0.151753	0.00107134	0.0586964	0.0101281	0.0586964	F0F1 ATP synthase subunit epsilon	1350	1445	2102	840	686	637
G372_RS13485	0.00320892	0.015207	-0.366522	0.124372	4.81246	0.0467695	0.00818838	-0.000103504	0.0150142	0.0150142	hypothetical protein	134	91	120	146	107	148
G372_RS0111360	0.00322366	0.01525	0.377133	0.128034	4.72567	0.0457006	0.00896394	-0.00517423	0.0156252	0.0156252	hypothetical protein	161	124	173	87	71	94
G372_RS0113120	0.00323874	0.0152944	-0.258823	0.0879119	7.33595	0.0275685	0.00064211	0.0086974	0.0109506	0.0109506	chemotaxis protein CheV	1576	1247	1721	1695	1390	1635
G372_RS0107485	0.00339231	0.0159915	0.309731	0.105719	6.26837	0.0421919	0.002117	0.0146478	0.00973373	0.0146478	DsrE family protein	648	644	772	459	347	418
G372_RS0110245	0.00343454	0.0161622	0.405211	0.138491	5.85779	0.0722744	0.00317954	0.02559	0.0102573	0.02559	UDP-N-acetylglucosamine diphosphorylase/glucosamine-1-phosphate N-acetyltransferase	400	453	598	281	202	296
G372_RS0104005	0.00347129	0.0163066	0.27996	0.0957918	6.12087	0.0345246	0.00259452	0.0111696	0.0098872	0.0111696	HAMP domain-containing protein	605	585	559	346	272	475
G372_RS0104930	0.00351756	0.0164377	-0.726446	0.248914	5.02235	0.232667	0.00645686	0.0864801	0.0135856	0.0864801	NUDIX domain-containing protein	103	134	116	146	147	348
G372_RS0104970	0.00351334	0.0164377	-0.357082	0.122337	4.8735	0.0479856	0.00784711	0.00431955	0.0146023	0.0146023	sulfurtransferase	132	109	124	124	111	199
G372_RS0105900	0.00351146	0.0164377	0.286084	0.0980073	5.62989	0.0291311	0.00363511	0.00208714	0.0107731	0.0107731	hypothetical protein	386	327	362	234	185	234
G372_RS0109350	0.00361866	0.0168808	-0.551407	0.189512	4.66809	0.134313	0.00881261	0.0450594	0.0160468	0.0450594	adenosylmethionine--8-amino-7-oxononanoate transaminase	112	94	68	107	105	176
G372_RS0112730	0.00363126	0.0169102	0.429536	0.147681	6.71458	0.081522	0.00130723	0.0314074	0.00976582	0.0314074	transcriptional coactivator/pterin dehydratase	916	1147	1401	597	490	726
G372_RS0107975	0.00363818	0.0169131	-0.394721	0.135739	5.06948	0.0688515	0.00612246	0.0215152	0.0132647	0.0215152	EVE domain-containing protein	157	155	125	166	134	235
G372_RS0104655	0.00368206	0.0170876	-0.24829	0.0854936	6.63897	0.0225803	0.00126082	0.00384663	0.00970291	0.00970291	bifunctional diguanylate cyclase/phosphodiesterase	831	588	868	774	634	954
G372_RS0107090	0.003721	0.0172385	-0.251156	0.0865789	6.42592	0.0195581	0.00159663	-0.000803844	0.00964723	0.00964723	rhodanese-like domain-containing protein	656	539	630	632	511	768
G372_RS0106405	0.00380664	0.0175504	0.360719	0.124654	5.04051	0.0576818	0.00701144	0.0162966	0.0134611	0.0162966	hypothetical protein	237	193	190	107	85	169
G372_RS0108280	0.00380792	0.0175504	0.411843	0.142326	4.40429	0.0713778	0.0122438	0.013373	0.0181415	0.0181415	hypothetical protein	127	93	117	69	55	55
G372_RS0112850	0.00380396	0.0175504	-0.248124	0.0857381	6.57814	0.0201332	0.00136001	0.000719429	0.00966651	0.00966651	DUF2309 domain-containing protein	726	617	789	743	630	833
G372_RS0110655	0.00385029	0.0177153	-0.272541	0.0942994	5.85056	0.0327482	0.00306876	0.0100119	0.0102698	0.0102698	hypothetical protein	368	308	338	346	262	502
G372_RS0106340	0.00388047	0.0178236	-0.565793	0.195931	3.49606	0.127612	0.0291399	0.0103301	0.0284434	0.0284434	ABC transporter ATP-binding protein	30	19	35	44	36	37
G372_RS0102410	0.00393522	0.0180443	0.425235	0.147482	4.8997	0.0803485	0.00799638	0.0246299	0.0144277	0.0246299	UDP-N-acetylenolpyruvoylglucosamine reductase	199	126	250	104	75	117
G372_RS0105620	0.00395795	0.0180868	0.285185	0.0989712	5.56502	0.0326112	0.00374122	0.00652387	0.0109517	0.0109517	ATP-binding protein	355	289	366	219	185	206
G372_RS0111570	0.00395221	0.0180868	0.444224	0.15414	4.2567	0.0732295	0.0162133	0.00132312	0.0194254	0.0194254	MFS transporter	98	102	93	54	38	62
G372_RS0110695	0.00398988	0.0182017	0.377495	0.131122	4.65691	0.0492718	0.0096592	-0.00150772	0.0161302	0.0161302	tryptophan-rich sensory protein	145	125	155	82	71	81
G372_RS0102990	0.00400473	0.0182385	-0.493616	0.171526	6.4409	0.108402	0.00152813	0.0426036	0.0096442	0.0426036	nucleoside-diphosphate kinase	626	561	461	671	509	1093
G372_RS0107280	0.00403227	0.0183329	0.347153	0.120723	6.44043	0.0536433	0.00160796	0.020253	0.00964428	0.020253	hypothetical protein	823	752	923	584	371	487
G372_RS0110620	0.0040608	0.0184314	0.280618	0.0976607	5.68375	0.0242944	0.00367523	-0.00283721	0.0106312	0.0106312	SPOR domain-containing protein	401	333	399	221	202	269
G372_RS0101585	0.00408582	0.0185136	-0.322051	0.112156	5.12308	0.0363404	0.00595727	0.000574365	0.0129111	0.0129111	thioredoxin family protein	185	140	154	175	138	228
G372_RS0110875	0.0040938	0.0185186	-0.361171	0.125807	4.73691	0.0437	0.00819648	-0.00248803	0.0155444	0.0155444	CsbD family protein	114	92	112	136	101	133
G372_RS0105335	0.00415268	0.0187534	-0.342987	0.119661	7.58692	0.0524746	0.000466431	0.0210117	0.0116573	0.0210117	two-component system response regulator	2117	1422	2103	2502	1749	2121
G372_RS0109835	0.00426329	0.0192206	-0.601558	0.210482	5.7348	0.161725	0.00324328	0.063211	0.0105036	0.063211	hypothetical protein	270	279	219	294	289	620
G372_RS0102870	0.00428591	0.0192888	-0.542811	0.190039	4.62469	0.131731	0.0103898	0.0437825	0.0163732	0.0437825	orotate phosphoribosyltransferase	106	79	76	91	97	194
G372_RS0109145	0.00429279	0.0192888	0.259838	0.0909859	6.15806	0.0259779	0.00257439	0.00457954	0.00984326	0.00984326	PAS sensor domain-containing protein	672	476	671	376	340	403
G372_RS0104890	0.00438257	0.0196594	-0.497576	0.174635	6.60123	0.110872	0.0015402	0.0442061	0.00967881	0.0442061	HNH endonuclease	509	618	828	837	825	880
G372_RS0107265	0.00442639	0.0197899	0.243988	0.0857283	6.78267	0.0225425	0.00118522	0.00466914	0.0098388	0.0098388	TIGR02099 family protein	1227	871	1279	732	593	793
G372_RS0112515	0.00442528	0.0197899	0.613455	0.215539	6.87796	0.168647	0.00114394	0.068542	0.00996623	0.068542	Fe-S cluster assembly scaffold IscU	1739	1142	1595	901	550	531
G372_RS0108105	0.00447939	0.0199936	1.25465	0.441426	2.01496	0.612747	0.223207	-0.0475786	0.0690783	0.0690783	cobalamin biosynthesis protein	20	9	19	2	5	3
G372_RS0104785	0.0045113	0.0201026	-0.431017	0.151766	4.2417	0.0653687	0.0149894	-0.00294451	0.0195601	0.0195601	hypothetical protein	69	52	66	79	55	105
G372_RS0100975	0.0045862	0.0204025	0.332963	0.117458	6.66175	0.0498149	0.00125044	0.0194441	0.00971983	0.0194441	30S ribosomal protein S10	1348	811	994	672	466	669
G372_RS0100595	0.004596	0.0204123	-0.807954	0.285087	6.75369	0.293366	0.001403	0.120509	0.00980587	0.120509	30S ribosomal protein S12	717	666	541	887	746	2312
G372_RS0108870	0.00462313	0.0204989	-0.333224	0.117656	6.39471	0.049923	0.0015067	0.0192578	0.00965668	0.0192578	PAS domain S-box protein	563	487	654	716	582	613
G372_RS0103460	0.00471862	0.0208879	-0.255451	0.0904045	6.68963	0.0293841	0.00127787	0.0109816	0.00974293	0.0109816	bifunctional pyr operon transcriptional regulator/uracil phosphoribosyltransferase PyrR	833	609	963	885	694	897
G372_RS0100770	0.00475215	0.0209672	-0.484846	0.171726	3.80091	0.0818812	0.0200232	-0.00582494	0.0242114	0.0242114	hypothetical protein	43	36	37	59	41	54
G372_RS0110705	0.00475125	0.0209672	0.303881	0.107628	5.29378	0.0307592	0.0054387	-0.00161849	0.011937	0.011937	AcrB/AcrD/AcrF family protein	288	230	258	151	139	171
G372_RS0103990	0.00477851	0.0210145	0.291853	0.103435	7.04967	0.0383921	0.000896261	0.015152	0.0102679	0.015152	hydrogen peroxide-inducible genes activator	1694	1389	1391	819	693	1258
G372_RS0111065	0.00477137	0.0210145	-0.249862	0.0885382	7.39608	0.0254335	0.000646839	0.00773348	0.0111117	0.0111117	hypothetical protein	1641	1310	1910	1668	1507	1811
G372_RS0112910	0.00478768	0.0210204	-0.31289	0.110915	5.11842	0.0418045	0.00551201	0.0100312	0.0129412	0.0129412	hypothetical protein	168	129	184	153	140	250
G372_RS0101480	0.0048032	0.0210541	0.263589	0.0934731	6.78109	0.0313284	0.00119318	0.0119127	0.00983694	0.0119127	ATP phosphoribosyltransferase regulatory subunit	1248	875	1283	795	527	794
G372_RS13930	0.00489741	0.0214322	-1.09364	0.388683	2.04508	0.503446	0.158845	0.0219453	0.0677672	0.0677672	histidine kinase	4	7	3	17	9	10
G372_RS0103660	0.00493752	0.021539	-0.2624	0.0933449	5.86905	0.0303401	0.00283169	0.0092732	0.0102382	0.0102382	DUF945 domain-containing protein	412	309	323	382	323	384
G372_RS0108655	0.00493785	0.021539	-1.01355	0.360557	6.10484	0.464185	0.00247585	0.192526	0.00990706	0.192526	30S ribosomal protein S9	393	332	207	454	465	1407
G372_RS0106320	0.00522391	0.0227498	-0.53191	0.190451	4.49876	0.128405	0.0118899	0.0425177	0.0173611	0.0425177	hypothetical protein	69	89	72	82	95	148
G372_RS0105735	0.00536678	0.0233342	0.307978	0.110618	5.40704	0.0431387	0.00452412	0.0138304	0.0114614	0.0138304	1-acyl-sn-glycerol-3-phosphate acyltransferase	315	277	277	197	148	172
G372_RS0112130	0.00543596	0.0235968	0.258577	0.0930133	5.89125	0.0236588	0.00277523	0.0017251	0.010202	0.010202	alpha/beta hydrolase	485	379	523	295	250	314
G372_RS0112670	0.00545218	0.023629	0.287212	0.10335	5.85208	0.0375648	0.00312694	0.0128949	0.0102671	0.0128949	MexH family multidrug efflux RND transporter periplasmic adaptor subunit	526	401	423	287	193	356
G372_RS0100835	0.00557374	0.024117	-0.237811	0.0857948	6.55925	0.0203804	0.00138326	0.00288454	0.00965785	0.00965785	excinuclease ABC subunit UvrA	780	615	707	774	564	831
G372_RS0110455	0.00562704	0.0243085	0.273671	0.0988424	5.60917	0.0330217	0.00382577	0.00936556	0.0108289	0.0108289	MarR family transcriptional regulator	358	319	369	180	182	296
G372_RS0102360	0.00568877	0.0245357	0.324622	0.117395	5.05335	0.0318773	0.0072988	-0.00696938	0.0133737	0.0133737	8-oxo-dGTP diphosphatase MutT	218	176	223	116	101	144
G372_RS0109230	0.00575146	0.0247304	-0.599328	0.21702	6.24843	0.164276	0.00186942	0.0687773	0.00975094	0.0687773	adenylosuccinate lyase	514	450	335	518	466	1017
G372_RS0111935	0.00575233	0.0247304	-0.406285	0.147121	6.2048	0.0754938	0.00191566	0.0305512	0.00979274	0.0305512	acetyl-CoA carboxylase carboxyltransferase subunit alpha	488	424	439	461	407	859
G372_RS0113075	0.00580582	0.0249205	0.266308	0.096539	5.65551	0.0317369	0.00327458	0.00980169	0.0107051	0.0107051	phenylalanine--tRNA ligase subunit alpha	374	367	349	200	195	289
G372_RS0105030	0.00595671	0.0255215	-0.350975	0.12762	5.42424	0.0564992	0.00410696	0.0203233	0.0113987	0.0203233	hypothetical protein	275	145	237	236	216	279
G372_RS0105920	0.00596483	0.0255215	-0.265901	0.0967013	6.11439	0.0324323	0.00204299	0.0119837	0.00989516	0.0119837	glycosyltransferase	464	445	414	459	356	609
G372_RS0104795	0.00598327	0.0255597	0.250154	0.0910083	6.09165	0.0211837	0.00249997	0.000513305	0.00992378	0.00992378	SLC13 family permease	628	463	596	366	300	390
G372_RS0109280	0.0060669	0.0258758	0.545954	0.198952	7.79839	0.136918	0.000478402	0.0588947	0.0123253	0.0588947	ATP-dependent Clp protease adapter ClpS	3885	2380	4901	2130	1286	1684
G372_RS0102405	0.0060974	0.0259647	0.397096	0.144794	6.04184	0.0724637	0.00265898	0.0287888	0.00998846	0.0287888	D-alanine--D-alanine ligase	643	391	740	338	229	382
G372_RS0102725	0.00615126	0.0261526	-0.659217	0.240625	3.50361	0.19985	0.0342892	0.0525611	0.0283269	0.0525611	hypothetical protein	36	14	35	45	32	48
G372_RS0109345	0.0062209	0.0264069	-0.236332	0.0863816	6.51746	0.0176013	0.00154765	-0.000490846	0.00964502	0.00964502	aminotransferase class V-fold PLP-dependent enzyme	719	600	695	668	561	852
G372_RS0112930	0.00623724	0.0264345	-0.431116	0.157627	4.614	0.0855739	0.0104291	0.0268403	0.0164547	0.0268403	glycerate dehydrogenase	93	74	106	90	87	179
G372_RS0100805	0.00629133	0.0266217	0.419641	0.153591	6.61195	0.0811379	0.00144073	0.0339446	0.00968516	0.0339446	heat-inducible transcriptional repressor HrcA	1135	831	1130	685	469	493
G372_RS0103590	0.0063259	0.0267259	-0.440888	0.161474	4.82124	0.0896033	0.00812511	0.0309858	0.0149541	0.0309858	30S ribosomal protein S12 methylthiotransferase RimO	123	104	105	124	96	223
G372_RS0105905	0.00637521	0.026892	0.297841	0.109186	5.15926	0.0341883	0.00519976	0.00426975	0.0126826	0.0126826	hypothetical protein	251	201	224	151	100	160
G372_RS13400	0.00642787	0.0269889	-0.636184	0.233452	4.704	0.186819	0.00959578	0.0721541	0.0157824	0.0721541	GTP-binding protein TypA	119.553	95.5304	61.4458	118.368	108.437	195
G372_RS0109775	0.00642627	0.0269889	0.310966	0.114108	5.99505	0.0446346	0.00260091	0.0169299	0.0100506	0.0169299	methionyl-tRNA formyltransferase	592	413	581	248	294	401
G372_RS0111275	0.00642832	0.0269889	-0.33032	0.121214	5.20762	0.050365	0.00543015	0.0166092	0.0123935	0.0166092	ATPase	191	133	200	177	143	284
G372_RS0109140	0.00650541	0.0272699	0.252803	0.0929029	5.8669	0.025807	0.0027046	0.00558802	0.0102418	0.0102418	tRNA pseudouridine(13) synthase TruD	472	391	480	320	221	307
G372_RS0102960	0.00654848	0.0273464	0.240042	0.0882839	7.37662	0.0234509	0.00063206	0.00707399	0.011059	0.011059	outer membrane protein assembly factor BamB	2111	1811	2113	1394	1108	1333
G372_RS0110010	0.00656276	0.0273464	0.331934	0.122113	4.83864	0.0464056	0.0075316	0.0091578	0.0148358	0.0148358	efflux RND transporter periplasmic adaptor subunit	205	117	189	93	81	116
G372_RS0110260	0.00656436	0.0273464	0.520667	0.191551	7.87675	0.125358	0.00044097	0.0545964	0.0125903	0.0545964	F0F1 ATP synthase subunit gamma	3511	3455	4550	2286	1704	1556
G372_RS0107760	0.00655612	0.0273464	-0.63402	0.233217	3.50094	0.185862	0.0324721	0.0491129	0.028368	0.0491129	tRNA-Ser	20	35	26	36	39	47
G372_RS0109365	0.00659367	0.0273836	-0.593763	0.218561	4.92482	0.163089	0.00756631	0.0640867	0.0142574	0.0640867	S-methyl-5'-thioinosine phosphorylase	118	130	95	137	122	273
G372_RS0112415	0.00658841	0.0273836	-0.395272	0.145483	5.3149	0.0722704	0.00542307	0.0263249	0.0118387	0.0263249	hypothetical protein	183	173	201	244	222	202
G372_RS0102740	0.00665397	0.0275489	-0.677368	0.249612	6.54537	0.212416	0.00162507	0.0918341	0.00965257	0.0918341	6,7-dimethyl-8-ribityllumazine synthase	611	617	446	673	646	1548
G372_RS0112975	0.0066529	0.0275489	0.343983	0.126756	6.07949	0.0547778	0.00277568	0.021325	0.00993949	0.021325	DUF393 domain-containing protein	701	412	666	366	289	339
G372_RS0100780	0.00669164	0.0276622	-0.373414	0.137699	5.61902	0.0645847	0.00398062	0.024461	0.0108023	0.024461	hypothetical protein	313	230	228	271	222	439
G372_RS0106205	0.00671082	0.0276989	0.236585	0.0872729	7.19045	0.0206032	0.000842801	0.00392157	0.010582	0.010582	RNA polymerase sigma-54 factor	1755	1385	1891	1005	851	1384
G372_RS0101320	0.00673713	0.0277395	0.284574	0.105026	6.31083	0.0375313	0.00176618	0.0147795	0.0097014	0.0147795	hypothetical protein	659	750	713	437	349	515
G372_RS0113195	0.00674131	0.0277395	-0.373592	0.137889	4.48489	0.0603829	0.0110467	0.0120928	0.0174736	0.0174736	ergothioneine biosynthesis protein EgtB	92	61	96	115	75	101
G372_RS0103730	0.00688487	0.0282869	0.338117	0.125119	4.96118	0.0530825	0.00699712	0.016485	0.0140077	0.016485	MFS transporter	246	163	165	110	99	115
G372_RS0110440	0.00692566	0.0284111	0.288468	0.106824	5.29024	0.0333263	0.00516299	0.00528981	0.0119541	0.0119541	TonB-dependent receptor	270	211	290	169	112	192
G372_RS0103500	0.00695669	0.0284949	0.240272	0.0890257	7.4553	0.0227536	0.000613025	0.00617988	0.0112753	0.0112753	response regulator	2527	1776	2280	1327	1075	1827
G372_RS0106130	0.00708216	0.0289646	0.232016	0.0861567	6.80379	0.0174526	0.00126995	0.000358921	0.00986452	0.00986452	argininosuccinate synthase	1188	971	1240	717	578	901
G372_RS0112155	0.00709959	0.0289918	0.356319	0.132355	6.11351	0.0591104	0.00236861	0.0239083	0.00989625	0.0239083	hypothetical protein	753	491	587	395	300	329
G372_RS0107715	0.00719934	0.02931	-0.538475	0.200364	3.44904	0.119889	0.0310347	0.0100932	0.0291841	0.0291841	nodulation protein NodJ	23	29	27	39	25	50
G372_RS0108925	0.00719233	0.02931	0.246372	0.0916627	6.04445	0.0277216	0.00261803	0.00927185	0.00998505	0.00998505	23S rRNA (uracil(1939)-C(5))-methyltransferase RlmD	612	434	563	369	297	341
G372_RS0106505	0.00725857	0.0295065	-0.314823	0.117264	4.99087	0.033754	0.00682355	-0.00179856	0.0138026	0.0138026	DUF2442 domain-containing protein	147	122	151	167	132	166
G372_RS0112475	0.00734744	0.0298226	0.26492	0.0988258	5.54844	0.022701	0.0036503	-0.00159244	0.0109995	0.0109995	type II toxin-antitoxin system Phd/YefM family antitoxin	331	290	361	207	169	234
G372_RS0112590	0.00740705	0.0300192	-0.280948	0.104911	5.30985	0.0314914	0.00464785	0.00511694	0.0118616	0.0118616	sigma-54-dependent Fis family transcriptional regulator	207	155	232	189	174	276
G372_RS0100470	0.00742998	0.0300668	-0.325599	0.121631	5.0194	0.0495573	0.00760181	0.0145894	0.0136058	0.0145894	ATP phosphoribosyltransferase	168	144	120	151	142	189
G372_RS0101890	0.00745192	0.0301103	-0.230542	0.0861535	6.84664	0.0208651	0.0012125	0.00493785	0.00992114	0.00992114	MinD/ParA family protein	949	906	945	990	754	1139
G372_RS0103230	0.00746559	0.0301202	-0.349545	0.130655	4.64178	0.0488227	0.00936218	0.00584816	0.0162438	0.0162438	hypothetical protein	105	96	89	99	92	148
G372_RS0101610	0.00757724	0.0304791	-0.74536	0.279124	8.86037	0.260161	0.000153657	0.116712	0.0167896	0.116712	hypothetical protein	5601	4110	6865	5372	10270	14041
G372_RS0107560	0.00756846	0.0304791	0.346039	0.129567	4.70601	0.0560679	0.00903941	0.0161419	0.0157677	0.0161419	hypothetical protein	161	109	177	100	61	94
G372_RS0103555	0.00760935	0.0305625	-0.330336	0.123771	9.15971	0.0511195	0.000110056	0.0228688	0.0184147	0.0228688	type I glyceraldehyde-3-phosphate dehydrogenase	9294	7129	10913	11466	9042	9842
G372_RS0112385	0.00765901	0.0307161	-0.281387	0.105517	5.34317	0.0360118	0.004986	0.0103369	0.0117148	0.0117148	PDZ domain-containing protein	251	182	180	208	173	279
G372_RS0104755	0.00771746	0.0309043	-0.270513	0.101537	5.55057	0.0343249	0.00361589	0.0118487	0.0109933	0.0118487	short-chain dehydrogenase	301	204	254	224	257	320
G372_RS0104665	0.00778381	0.0311236	0.45497	0.170957	5.1091	0.0971708	0.00660146	0.0372381	0.0130018	0.0372381	DUF3293 domain-containing protein	236	221	236	84	119	164
G372_RS0111190	0.00784123	0.0313067	-0.42182	0.158649	4.0919	0.0735372	0.0167819	0.00841502	0.0209722	0.0209722	thioester reductase	62	41	60	52	64	86
G372_RS0103855	0.00788802	0.0314468	0.364152	0.137063	4.55467	0.0586544	0.0112643	0.0123262	0.016915	0.016915	TlpA family protein disulfide reductase	147	124	111	60	62	95
G372_RS0106530	0.00794091	0.0316107	-0.29149	0.109807	5.19972	0.0302047	0.0056471	0.000246298	0.0124392	0.0124392	CPBP family intramembrane metalloprotease	182	170	170	189	153	229
G372_RS0102420	0.00797496	0.0316832	0.46598	0.175634	4.95412	0.102158	0.0076599	0.0386111	0.0140564	0.0386111	undecaprenyldiphospho-muramoylpentapeptide beta-N-acetylglucosaminyltransferase	190	146	283	101	71	141
G372_RS0109645	0.00799082	0.0316832	-0.289549	0.109163	5.24555	0.0346671	0.00569238	0.00620196	0.0121823	0.0121823	tRNA dihydrouridine synthase DusB	203	157	190	173	157	279
G372_RS0111030	0.00799451	0.0316832	-0.326027	0.122922	4.91923	0.0407422	0.00836931	0.00269833	0.0142955	0.0142955	hypothetical protein	131	117	140	135	110	202
G372_RS0109980	0.0080448	0.0318356	0.256188	0.0966681	5.71413	0.0239823	0.00346371	0.00190205	0.0105534	0.0105534	(Fe-S)-binding protein	383	354	415	221	219	282
G372_RS0102085	0.00806702	0.0318766	0.226535	0.0855089	6.82222	0.01792	0.0010795	0.00207631	0.00988815	0.00988815	peptidylprolyl isomerase	1286	938	1243	765	632	823
G372_RS0106825	0.00810903	0.0319955	-0.26403	0.099728	6.34729	0.0328483	0.00182162	0.0130969	0.00967867	0.0130969	leucyl aminopeptidase	555	464	670	635	525	599
G372_RS13840	0.0081597	0.0321482	0.325552	0.123064	6.6143	0.0499689	0.00223839	0.0204787	0.0096866	0.0204787	glyoxalase/bleomycin resistance/dioxygenase family protein	1280.41	714.419	1018.84	505.325	534.695	679.929
G372_RS0109960	0.00818164	0.0321875	-0.74317	0.281027	3.49148	0.260462	0.0313864	0.0870777	0.0285145	0.0870777	hypothetical protein	25	24	25	33	26	88
G372_RS0103885	0.0082698	0.0324868	-0.484323	0.183396	5.79369	0.110732	0.00344183	0.0470095	0.0103761	0.0470095	peptide chain release factor 3	311	307	246	305	296	584
G372_RS0105965	0.00828879	0.0325139	-0.278517	0.105496	5.34379	0.0291294	0.00498191	0.00234059	0.0117121	0.0117121	SIS domain-containing protein	228	190	191	203	195	253
G372_RS0108650	0.00833177	0.0326348	-1.08461	0.411099	6.62474	0.555716	0.00155336	0.25195	0.00969325	0.25195	50S ribosomal protein L13	549	573	368	766	711	2889
G372_RS0111020	0.00834918	0.0326554	-1.80812	0.685513	6.02074	1.5447	0.00302637	0.701867	0.0100162	0.701867	hypothetical protein	214	164	181	234	1249	2600
G372_RS0104975	0.00851344	0.0332494	-0.293385	0.111511	5.36378	0.0407439	0.00490794	0.013744	0.0116292	0.013744	hypothetical protein	221	162	240	192	177	320
G372_RS0111415	0.00855193	0.0333513	-0.442487	0.16828	3.96635	0.0851711	0.0201937	0.012847	0.0222837	0.0222837	hypothetical protein	55	34	54	56	41	88
G372_RS0100260	0.0086278	0.0335984	-0.27154	0.103386	6.75963	0.0349467	0.0011298	0.0149033	0.00981239	0.0149033	prepilin-type cleavage/methylation domain-containing protein	807	839	869	803	862	1006
G372_RS0100455	0.00864098	0.033601	0.273134	0.104014	5.41947	0.0259358	0.00481244	-0.000368564	0.0114159	0.0114159	histidinol-phosphate transaminase	322	237	312	182	157	192
G372_RS0102455	0.00867404	0.0336809	0.434897	0.165698	4.64721	0.0896877	0.00975468	0.031429	0.0162029	0.031429	cell division protein FtsL	160	112	166	72	49	119
G372_RS0102680	0.00884814	0.0342578	0.315069	0.120353	4.96793	0.0335689	0.00776623	-0.00303077	0.0139612	0.0139612	class I SAM-dependent methyltransferase	211	168	184	118	89	126
G372_RS0105925	0.00884147	0.0342578	-0.369385	0.141088	5.49937	0.0648203	0.00439108	0.0254675	0.0111474	0.0254675	hypothetical protein	268	200	215	298	252	244
G372_RS0110155	0.00887424	0.0343095	0.416415	0.159127	4.22056	0.067678	0.018231	0.00134116	0.0197514	0.0197514	hypothetical protein	99	85	95	55	46	47
G372_RS0102955	0.00891867	0.0344317	0.225869	0.0863693	6.49996	0.0159312	0.00154717	-0.000764566	0.00964232	0.00964232	ribosome biogenesis GTPase Der	883	748	862	514	458	643
G372_RS0100865	0.00894988	0.0345026	0.431618	0.16512	5.65688	0.088606	0.00385902	0.0370381	0.0107015	0.0370381	50S ribosomal protein L36	338	409	446	210	142	296
G372_RS0100525	0.00902424	0.0347394	-0.569965	0.218282	4.57705	0.154635	0.00961236	0.0618584	0.0167398	0.0618584	50S ribosomal protein L3 N(5)-glutamine methyltransferase	76	98	71	100	84	184
G372_RS0112710	0.00905209	0.0347968	0.326712	0.125173	7.16683	0.0508243	0.000769735	0.0227328	0.0105253	0.0227328	BMC domain-containing protein	1465.1	1781.07	1878.52	950.019	892.216	1136.34
G372_RS0100110	0.0090955	0.0349137	-0.305129	0.116978	5.00372	0.0355825	0.0068117	0.00275245	0.0137139	0.0137139	pyridoxamine 5'-phosphate oxidase	135	123	172	153	125	196
G372_RS0104275	0.00915747	0.0350515	0.309895	0.118911	5.48046	0.0457783	0.00445991	0.0167497	0.0112076	0.0167497	hypothetical protein	352	324	265	177	158	223
G372_RS0104540	0.00914555	0.0350515	-0.283221	0.108657	5.3176	0.0284015	0.00588293	-0.000461271	0.0118265	0.0118265	RDD family protein	216	186	189	206	187	242
G372_RS0111595	0.00922187	0.0352477	-0.22542	0.0865762	7.1505	0.0171929	0.00075623	0.00167954	0.0104869	0.0104869	type I secretion protein TolC	1273	1115	1436	1281	1085	1511
G372_RS0105635	0.00934387	0.0356128	-0.273567	0.10525	5.30198	0.0260671	0.00471826	-0.000199055	0.0118982	0.0118982	succinate dehydrogenase iron-sulfur subunit sdhB	191	179	215	210	165	253
G372_RS0111290	0.00933513	0.0356128	-0.358458	0.137893	5.13927	0.0613651	0.00664571	0.0218761	0.0128077	0.0218761	LPS biosynthesis protein	192	111	186	159	182	211
G372_RS0110325	0.00939063	0.0357403	-0.529731	0.203939	3.45841	0.121704	0.0333523	0.0135473	0.0290345	0.0290345	membrane protein insertion efficiency factor YidD	24	27	29	28	31	57
G372_RS0106030	0.00942546	0.0358221	0.298179	0.114851	5.05935	0.0380122	0.00645309	0.00772061	0.013333	0.013333	hypothetical protein	254	160	206	115	116	134
G372_RS0112875	0.00946706	0.0359294	-0.463941	0.178803	3.76394	0.0678169	0.02328	-0.0192243	0.0246755	0.0246755	hypothetical protein	37	34	42	47	43	56
G372_RS0106295	0.00962745	0.0364865	-0.324288	0.12526	4.96354	0.0503769	0.00768705	0.0158479	0.0139915	0.0158479	cytochrome c	123	148.013	135.029	145.04	137.031	172.014
G372_RS0112720	0.00970297	0.036721	0.319107	0.123387	7.14485	0.048818	0.000871016	0.0219654	0.0104739	0.0219654	BMC domain-containing protein	1425.62	1579.29	2015.04	954.103	891.031	1072.79
G372_RS0110395	0.00987757	0.0373291	-0.443698	0.17197	5.8987	0.0945488	0.00286466	0.0414959	0.0101902	0.0414959	hydroxymethylbilane synthase	343	309	323	308	335	659
G372_RS0101875	0.00991004	0.0373993	-0.220746	0.0855952	6.84879	0.0173038	0.00106567	0.0022908	0.00992413	0.00992413	protein phosphatase CheZ	967	882	973	972	810	1071
G372_RS0113005	0.0100421	0.0378446	0.492706	0.191389	3.57073	0.0845879	0.0276265	-0.0129264	0.0273179	0.0273179	TetR/AcrR family transcriptional regulator	56	44	51	27	17	32
G372_RS0102745	0.010129	0.0380653	0.233698	0.0908838	6.08327	0.0193221	0.0024552	0.00121688	0.00993458	0.00993458	gamma-glutamyltransferase	573	474	607	325	322	409
G372_RS0109220	0.0101213	0.0380653	0.246152	0.095717	5.71058	0.0221562	0.00318045	0.00179332	0.0105622	0.0105622	tRNA dihydrouridine(20/20a) synthase DusA	425	330	391	225	191	319
G372_RS0107670	0.0101957	0.0382625	-0.310629	0.120909	4.83852	0.0337445	0.0070918	-0.00109503	0.0148366	0.0148366	phosphoribosyl-AMP cyclohydrolase	123	112	125	144	103	155
G372_RS0113320	0.0102218	0.0383066	0.34531	0.134454	6.32283	0.0574653	0.00193341	0.0251835	0.00969338	0.0251835	hypothetical protein	857	621	752	539	317	435
G372_RS0112220	0.0103006	0.0385484	0.495809	0.193255	6.10102	0.118565	0.00265485	0.0533662	0.00991186	0.0533662	site-specific integrase	591	495	881	383	278	286
G372_RS0101900	0.0104065	0.0388904	-0.552502	0.215651	6.33005	0.147384	0.00169862	0.0680594	0.00968881	0.0680594	branched-chain amino acid transaminase	555	468	409	513	496	1149
G372_RS0103340	0.0104516	0.0390047	0.326746	0.127609	5.16265	0.0515698	0.00649079	0.0179354	0.0126616	0.0179354	electron transport complex subunit RsxA	271	200	220	165	97	146
G372_RS0109380	0.0105222	0.039214	-0.505553	0.197622	5.9348	0.123541	0.00277446	0.0558074	0.0101353	0.0558074	beta-N-acetylhexosaminidase	372	293	319	355	305	768
G372_RS0103005	0.0105851	0.0393935	-0.761297	0.297835	5.98284	0.280318	0.00277789	0.13028	0.0100672	0.13028	30S ribosomal protein S15	333	354	232	416	339	1000
G372_RS0107875	0.0106699	0.0396543	-0.241968	0.0947658	5.86588	0.0242488	0.00322728	0.005128	0.0102436	0.0102436	hypothetical protein	365	311	370	409	281	396
G372_RS0110685	0.010687	0.0396628	0.432425	0.169394	3.94594	0.0625054	0.0205327	-0.0125227	0.0225089	0.0225089	LysR family transcriptional regulator	74	68	71	33	34	45
G372_RS0107055	0.0109207	0.0404744	0.219836	0.086372	6.46055	0.0234321	0.00154842	0.00961874	0.00964176	0.00964176	hypothetical protein	934	593	905	474	464	617
G372_RS0102880	0.0110805	0.0409535	0.816928	0.321606	6.11876	0.324328	0.00301684	0.152129	0.00988978	0.152129	MFS transporter	1067	545	757	185	186	576
G372_RS0103200	0.011075	0.0409535	0.260082	0.102382	5.39728	0.0276393	0.00422506	0.00495802	0.0114979	0.0114979	hypothetical protein	302	226	320	182	158	182
G372_RS0105850	0.0111509	0.0411574	-0.258475	0.101845	5.44813	0.0259137	0.00424348	0.0030952	0.011315	0.011315	zinc-finger domain-containing protein	228	191	268	233	217	263
G372_RS0100660	0.0115017	0.0423639	-0.222085	0.0878821	6.35365	0.0240558	0.00190969	0.00966445	0.0096752	0.0096752	DNA polymerase I	624	536	560	491	519	750
G372_RS0110205	0.0115094	0.0423639	-0.229592	0.0908612	7.67453	0.0170484	0.000457801	0.00108557	0.0119258	0.0119258	glutamate--ammonia ligase	2353	1830	2267	2025	1855	2711
G372_RS0102365	0.0115318	0.0423885	0.235335	0.0931593	5.88469	0.0203561	0.00280547	0.00187119	0.0102125	0.0102125	bifunctional glutamate N-acetyltransferase/amino-acid acetyltransferase ArgJ	507	382	470	314	234	320
G372_RS0112845	0.01163	0.0426909	-0.411346	0.163027	3.95866	0.0729873	0.0174985	0.0102835	0.0223682	0.0223682	nitrogen regulatory protein P-II	40	47	55	65	46	63
G372_RS0113135	0.0117533	0.0430846	0.290957	0.115484	5.8638	0.0414005	0.00316101	0.0168437	0.0102471	0.0168437	flagellar basal body rod protein FlgC	395	427	551	280	241	301
G372_RS0110495	0.0117863	0.0431469	0.226037	0.0897515	6.08285	0.0179036	0.00214787	0.00107185	0.00993512	0.00993512	carbohydrate kinase	608	460	582	320	315	429
G372_RS0106050	0.0118964	0.0434907	0.264992	0.105356	5.39335	0.0217718	0.00513698	-0.00425498	0.0115129	0.0115129	peptide chain release factor 1	308	233	303	173	142	209
G372_RS0105150	0.0119325	0.0435634	-0.21884	0.0870439	7.23722	0.0221345	0.000667637	0.00904143	0.0106973	0.0106973	recombinase RecA	1408	1318	1439	1423	1294	1465
G372_RS0104380	0.0119984	0.0437148	0.315486	0.125582	5.57518	0.0487845	0.00431588	0.0193404	0.010923	0.0193404	FAD-binding oxidoreductase	361	261	430	239	160	215
G372_RS0110385	0.0120065	0.0437148	0.263464	0.104884	5.42303	0.0340248	0.00475044	0.0117506	0.011403	0.0117506	CDP-6-deoxy-delta-3,4-glucoseen reductase	328	276	262	153	162	227
G372_RS0105115	0.0121267	0.0440718	-0.415949	0.16582	4.7584	0.0848994	0.00946515	0.0317792	0.0153913	0.0317792	nucleoside:proton symporter	111	92	113	96	107	206
G372_RS0105240	0.0121374	0.0440718	0.55192	0.220053	3.37246	0.144982	0.042189	0.0248076	0.030446	0.030446	AlpA family phage regulatory protein	32	47	50	18	14	29
G372_RS0109865	0.012309	0.0446347	-0.35905	0.143439	5.15084	0.0633646	0.00587026	0.0249917	0.0127349	0.0249917	JAB domain-containing protein	156	124	212	216	155	189
G372_RS0102735	0.0123685	0.0447901	0.413234	0.165198	4.04274	0.0785381	0.0194645	0.0146721	0.021471	0.021471	sulfoxide reductase heme-binding subunit YedZ	91	70	73	33	33	64
G372_RS0107440	0.0124052	0.044802	-0.645133	0.258012	6.05161	0.204743	0.00244457	0.0974104	0.00997571	0.0974104	rhodanese-like domain-containing protein	376	408	261	425	382	897
G372_RS0108970	0.0123972	0.044802	0.222808	0.0891008	7.46269	0.0208462	0.000612335	0.00682903	0.0112961	0.0112961	ABC transporter substrate-binding protein	2345	1771	2454	1479	1248	1482
G372_RS0102060	0.0124343	0.0448468	-0.558984	0.223632	6.06842	0.153753	0.00257543	0.0724414	0.00995385	0.0724414	30S ribosomal protein S21	395	410	296	420	377	850
G372_RS0113095	0.0124649	0.044897	0.871669	0.348849	2.52641	0.254755	0.132423	-0.0989066	0.0501204	0.0501204	tRNA-Pro	21	20	22	5	7	9
G372_RS0106840	0.0125781	0.0452052	0.255667	0.102451	5.92338	0.0322053	0.00295862	0.0127858	0.0101523	0.0127858	hypothetical protein	492	365	587	312	264	311
G372_RS0108005	0.0125841	0.0452052	-0.236612	0.094822	5.78453	0.0216699	0.0030922	0.00300073	0.0103946	0.0103946	fumarate/nitrate reduction transcriptional regulator Fnr	334	275	361	299	270	438
G372_RS0100250	0.0126168	0.0452622	-0.223613	0.0896458	7.52839	0.0215142	0.000570245	0.00757143	0.0114843	0.0114843	hypothetical protein	2104	1494	2021	1691	1527	2521
G372_RS0106170	0.0127238	0.0455852	0.504289	0.202411	4.44694	0.125457	0.0125898	0.0488658	0.017785	0.0488658	transporter	144	112	112	43	48	100
G372_RS0110330	0.0127964	0.0457841	-0.608136	0.244292	4.75101	0.182563	0.00873836	0.0807792	0.0154438	0.0807792	ribonuclease P protein component	95	101	88	102	105	258
G372_RS14015	0.0130839	0.0467506	0.269929	0.108777	6.00137	0.0360575	0.00275197	0.0149968	0.0100421	0.0149968	hypothetical protein	642.64	450.168	470.515	293.553	249.296	433.08
G372_RS0103095	0.0131443	0.0469039	0.431149	0.173862	7.62976	0.0920404	0.000552109	0.0447898	0.0117872	0.0447898	NADH-quinone oxidoreductase subunit NuoD	3101	2451	3026	1923	1338	1284
G372_RS0101525	0.0132165	0.0470993	-0.297342	0.119998	6.29733	0.0438032	0.00170642	0.019893	0.00971102	0.019893	50S ribosomal protein L9	532	552	481	524	449	768
G372_RS0109335	0.0132569	0.0471806	0.305512	0.12335	5.38165	0.0462595	0.00509782	0.017725	0.011558	0.017725	DNA-directed DNA polymerase	290	269	286	188	156	159
G372_RS0110710	0.0132807	0.0472026	0.276363	0.11161	5.14819	0.0336079	0.00593365	0.00743505	0.0127515	0.0127515	TolC family protein	260	159	256	136	116	153
G372_RS0111545	0.0133239	0.0472937	0.215899	0.0872323	6.37071	0.0173437	0.00174752	0.00245244	0.00966669	0.00966669	transcriptional repressor	759	672	746	507	380	541
G372_RS0100985	0.0133791	0.0473531	-0.240909	0.0973951	6.8319	0.028794	0.00116738	0.0130613	0.009901	0.0130613	valine--tRNA ligase	1081	853	830	1032	778	1029
G372_RS0101605	0.0133935	0.0473531	-0.66303	0.268093	9.86784	0.218131	4.85297e-05	0.107762	0.0229618	0.107762	cytochrome c	16859	11596	18791	14341	26478	37040
G372_RS0109580	0.0133739	0.0473531	0.216131	0.087373	6.31147	0.0229858	0.00175011	0.00946496	0.00970096	0.00970096	hypothetical protein	819	518	751	444	405	485
G372_RS0105295	0.0135764	0.0479367	0.357439	0.144813	4.43191	0.0574337	0.0135464	0.0103348	0.0179099	0.0179099	SPO1 DNA polymerase	140	81	122	70	55	64
G372_RS0101455	0.0137585	0.0484522	0.280363	0.113806	5.16304	0.0258136	0.00676853	-0.00397771	0.0126593	0.0126593	recombinase RecO	260	183	234	131	114	168
G372_RS0110320	0.0137476	0.0484522	-0.215745	0.0875661	6.36236	0.021595	0.00183101	0.00770805	0.00967072	0.00967072	membrane protein insertase YidC	676	523	549	593	526	623
G372_RS0105040	0.0138819	0.0488227	-0.272061	0.11058	5.14259	0.033072	0.00555523	0.00802832	0.0127867	0.0127867	hypothetical protein	200	151	151	161	145	232
G372_RS0104925	0.0139255	0.0488677	-0.844788	0.343524	5.04235	0.355711	0.0069858	0.170028	0.0134486	0.170028	BMC domain-containing protein	137	118	88	147	138	467
G372_RS13905	0.013931	0.0488677	-0.68837	0.279935	3.26452	0.236192	0.0387181	0.0788272	0.0323473	0.0788272	hypothetical protein	27	20	15	26	22	61
G372_RS0102575	0.0139567	0.0488941	-0.24315	0.0989067	7.11554	0.0294756	0.000803687	0.0138701	0.0104076	0.0138701	aminomethyl-transferring glycine dehydrogenase	1507	881	1346	1220	1010	1576
G372_RS0100070	0.0141533	0.0495181	-0.21706	0.0884751	6.21653	0.0178074	0.0019608	0.00263025	0.00978097	0.00978097	hypothetical protein	492	462	550	525	412	581
G372_RS0105865	0.0143823	0.0502537	0.269228	0.109998	5.16025	0.0222211	0.00547288	-0.0048778	0.0126764	0.0126764	hypothetical protein	232	195	240	136	117	159
G372_RS0111150	0.0144461	0.0504114	-0.57188	0.233805	4.05423	0.163712	0.0204438	0.0615531	0.0213527	0.0615531	hypothetical protein	75	39	37	53	65	93
G372_RS0103325	0.0144969	0.0505228	0.422572	0.172851	5.10017	0.0894231	0.00630654	0.0385099	0.0130604	0.0385099	electron transport complex subunit RsxD	236	195	248	158	101	105
G372_RS0113000	0.0145675	0.0507031	0.4374	0.179045	4.73593	0.0958642	0.00896157	0.0391242	0.0155515	0.0391242	hypothetical protein	204	121	158	83	89	74
G372_RS0102590	0.0148294	0.051548	-0.229468	0.0941787	7.11545	0.0264402	0.000902007	0.0124024	0.0104074	0.0124024	sensor domain-containing diguanylate cyclase	1318	1124	1231	1085	996	1760
G372_RS0110280	0.0149222	0.0517365	-0.421078	0.17298	6.32076	0.0890986	0.00167424	0.0432088	0.00969473	0.0432088	F0F1 ATP synthase subunit C	426	592	499	627	571	652
G372_RS0111055	0.0149123	0.0517365	-0.541156	0.222286	6.9586	0.147148	0.000940684	0.0731761	0.0100966	0.0731761	hypothetical protein	667	759	1409	1184	1103	1452
G372_RS0101660	0.015045	0.0520441	-0.51963	0.213726	5.33492	0.135819	0.00517861	0.0633395	0.0117501	0.0633395	arginine--tRNA ligase	185	198	153	193	181	401
G372_RS0102200	0.0150639	0.0520441	-0.218088	0.0897172	6.76723	0.0239277	0.00122456	0.0108492	0.00982091	0.0108492	PhoH family protein	996	751	872	977	757	889
G372_RS0106525	0.0150744	0.0520441	-0.488344	0.200916	3.93692	0.119985	0.0203307	0.0402202	0.0226095	0.0402202	PAP2 family protein	53	28	58	53	42	89
G372_RS0112885	0.0150883	0.0520441	-0.545295	0.224378	6.18106	0.149618	0.00209459	0.0734236	0.0098177	0.0734236	serine--tRNA ligase	532	423	305	469	443	890
G372_RS0100215	0.015166	0.0521456	0.454227	0.187049	3.75108	0.0785537	0.0276408	-0.00681969	0.0248401	0.0248401	sulfite exporter TauE/SafE family protein	70	45	65	25	30	36
G372_RS0101050	0.015176	0.0521456	-0.308477	0.127042	4.74207	0.0369301	0.00870194	0.00177645	0.0155075	0.0155075	glycosyltransferase family 2 protein	130	92	108	108	115	138
G372_RS0106785	0.0151427	0.0521456	0.242442	0.0998137	5.5499	0.0275973	0.0039489	0.00850587	0.0109953	0.0109953	molybdenum cofactor guanylyltransferase	334	257	392	181	191	246
G372_RS0104230	0.0152078	0.052188	-0.551079	0.227025	6.92341	0.152955	0.000964111	0.0763464	0.0100372	0.0763464	hypothetical protein	959	706	934	759	1315	1735
G372_RS0111755	0.0152636	0.0523129	-0.403006	0.166115	5.12655	0.0818374	0.00622751	0.035164	0.0128889	0.035164	globin	136	122	215	177	183	194
G372_RS0106235	0.0153499	0.0525418	0.302418	0.124759	5.23879	0.0461147	0.00531895	0.0180282	0.0122188	0.0180282	HPr family phosphocarrier protein	295	205	239	126	112	216
G372_RS0104750	0.0154119	0.0526198	-0.633455	0.261483	4.12937	0.202427	0.0178977	0.084662	0.0206043	0.084662	peroxiredoxin	45	64	43	56	63	125
G372_RS0105160	0.0153991	0.0526198	-0.215925	0.0891201	7.47976	0.0186016	0.000569173	0.00519895	0.0113444	0.0113444	alanine--tRNA ligase	1940	1700	1684	1771	1466	2142
G372_RS0100060	0.0156435	0.0532433	-0.479976	0.198573	5.61405	0.11643	0.0038779	0.0552688	0.0108157	0.0552688	transcription antitermination factor NusB	280	246	200	252	239	507
G372_RS0100765	0.015672	0.0532433	-0.216586	0.0896294	6.05867	0.0182851	0.00208362	0.00318159	0.00996652	0.00996652	hypothetical protein	492	363	436	446	327	536
G372_RS0103530	0.015671	0.0532433	0.318991	0.132006	6.05192	0.0514374	0.00248568	0.0236527	0.0099753	0.0236527	16S rRNA (uracil(1498)-N(3))-methyltransferase	657	384	676	285	279	431
G372_RS0109330	0.0156936	0.0532433	0.281607	0.116561	5.0101	0.0338229	0.00670983	0.00583031	0.0136699	0.0136699	dTMP kinase	218	170	190	133	99	120
G372_RS0110935	0.0156925	0.0532433	0.366429	0.151668	4.27101	0.0441367	0.0152073	-0.0103877	0.0192975	0.0192975	DUF4168 domain-containing protein	101	77	111	53	47	60
G372_RS0103775	0.0159714	0.0541175	-0.495238	0.20553	3.92205	0.124269	0.0216123	0.0417516	0.0227768	0.0417516	hemerythrin domain-containing protein	36	39	58	46	65	64
G372_RS0101110	0.0160429	0.0542912	-0.360823	0.149847	4.68955	0.0660031	0.00843734	0.025244	0.0158882	0.025244	polyamine aminopropyltransferase	99	105	98	104	86	177
G372_RS0103425	0.0163069	0.0551152	-0.272592	0.113487	5.05888	0.0331994	0.00598261	0.00765179	0.0133362	0.0133362	YggS family pyridoxal phosphate-dependent enzyme	170	112	186	169	137	182
G372_RS0104740	0.01641	0.055394	0.213517	0.0889777	6.11538	0.0209841	0.00198158	0.00715253	0.00989395	0.00989395	DUF502 domain-containing protein	592	553	538	383	314	404
G372_RS0101675	0.0167748	0.0565544	-0.46803	0.195697	5.40519	0.111672	0.00446915	0.0529766	0.0114683	0.0529766	NAD(P) transhydrogenase subunit alpha	187	214	187	322	221	225
G372_RS0104585	0.0170091	0.057201	-0.463685	0.194294	3.52475	0.101649	0.0286217	0.0178127	0.0280038	0.0280038	hypothetical protein	41	23	27	39	39	36
G372_RS0102325	0.0169901	0.057201	-0.854477	0.357983	4.17223	0.372822	0.0193018	0.172926	0.0201962	0.172926	tRNA-Gly	62	56	29	69	59	172
G372_RS0105050	0.0171581	0.0576297	-0.434565	0.182337	3.71884	0.0774206	0.0246111	0.0013473	0.0252592	0.0252592	hypothetical protein	43	32	35	57	36	46
G372_RS0106385	0.0171908	0.0576676	0.290109	0.121762	4.90933	0.0384298	0.00787615	0.00859984	0.0143627	0.0143627	NADPH-dependent oxidoreductase	158	165	202	113	79	129
G372_RS0102755	0.0173916	0.0581971	0.205525	0.0864158	7.08728	0.0173759	0.000855455	0.00502422	0.0103461	0.0103461	hypothetical protein	1498	1424	1509	895	843	1206
G372_RS0109680	0.017392	0.0581971	0.551216	0.231767	3.18417	0.124375	0.0467125	-0.00518324	0.0338616	0.0338616	entericidin, EcnA/B family	34	29	43	21	13	15
G372_RS0104885	0.0175444	0.0585611	-0.495953	0.208814	6.84575	0.126115	0.000964157	0.0644407	0.00991991	0.0644407	host attachment protein	655	751	1106	1105	1136	1006
G372_RS0112605	0.0175344	0.0585611	-0.571829	0.240739	4.3145	0.167643	0.014363	0.0725699	0.0189134	0.0725699	tRNA glutamyl-Q(34) synthetase GluQRS	81	46	64	57	88	140
G372_RS0102595	0.0176101	0.0586348	-0.205027	0.086374	7.04013	0.0175613	0.000941907	0.00524607	0.0102488	0.0102488	sensor domain-containing diguanylate cyclase	1161	948	1371	1114	920	1427
G372_RS0105090	0.0175915	0.0586348	-0.419977	0.176899	3.82465	0.0836143	0.02302	0.0153552	0.02392	0.02392	addiction module antidote protein, HigA family	37	36	51	50	53	48
G372_RS13750	0.0177039	0.0586715	0.368906	0.155541	4.27835	0.0661352	0.0170574	0.0145773	0.0192322	0.0192322	glyoxalase/bleomycin resistance/dioxygenase family protein	105.45	90.2737	93.0609	42.5372	43.4283	82.3766
G372_RS0105700	0.0177074	0.0586715	-0.235541	0.0993139	5.55713	0.0282901	0.00382053	0.0107372	0.0109743	0.0109743	C4-dicarboxylate ABC transporter substrate-binding protein	274	211	290	252	262	270
G372_RS0108615	0.0177085	0.0586715	0.639259	0.269541	5.0414	0.209779	0.00737026	0.101608	0.0134551	0.101608	peptidase C39 family protein	250	207	256	78	63	206
G372_RS0110160	0.0176918	0.0586715	0.268003	0.112986	5.20025	0.0347483	0.00671257	0.00978817	0.0124361	0.0124361	histidine kinase	244	198	253	173	108	153
G372_RS0105405	0.017829	0.0589982	-0.205056	0.0865527	7.11784	0.0199638	0.000824354	0.00836242	0.0104127	0.0104127	chromosome segregation protein SMC	1406	1040	1303	1356	1069	1274
G372_RS0105625	0.017864	0.0590413	0.210516	0.0888843	6.25542	0.0143782	0.00210585	-0.000751958	0.00974477	0.00974477	NifU family protein	694	560	687	442	346	486
G372_RS0110450	0.0181376	0.0598719	0.390088	0.165096	4.54703	0.0783587	0.0121738	0.0287112	0.0169753	0.0287112	porin	163	106	119	54	58	106
G372_RS0101315	0.018335	0.0604492	0.35422	0.150171	5.60322	0.064703	0.00355726	0.0302696	0.0108452	0.0302696	hypothetical protein	315	403	368	229	166	222
G372_RS0100530	0.0187121	0.0616169	-0.248659	0.105757	5.31169	0.0274998	0.00492369	0.00626443	0.0118532	0.0118532	4-hydroxy-tetrahydrodipicolinate reductase	226	164	212	178	201	243
G372_RS0102140	0.0187937	0.0618098	-0.284679	0.121161	7.27494	0.0419286	0.000723341	0.0212965	0.0107925	0.0212965	signal recognition particle protein	1628	1364	1220	1392	1164	2058
G372_RS0103125	0.0188998	0.0620829	-0.547564	0.233254	7.48054	0.155237	0.00060223	0.0810089	0.0113466	0.0810089	triose-phosphate isomerase	1833	1549	1192	1643	1560	3577
G372_RS0112160	0.018953	0.0621536	0.248529	0.105917	5.28867	0.0317931	0.00486585	0.0117131	0.0119617	0.0119617	O-acetyl-ADP-ribose deacetylase	303	202	253	184	125	167
G372_RS0102250	0.0189676	0.0621536	-0.563781	0.240299	4.72136	0.164647	0.00951991	0.0770954	0.0156563	0.0770954	tRNA-Ile	98	122	69	139	94	181
G372_RS0104980	0.0190494	0.0623457	-0.271482	0.115792	5.04738	0.0347112	0.00669738	0.00905324	0.0134143	0.0134143	hypothetical protein	171	120	167	155	116	226
G372_RS0100300	0.0191239	0.0625132	-0.261291	0.111515	9.1836	0.0218835	0.000101513	0.00165039	0.0185518	0.0185518	channel protein TolC	10737	7767	10331	9831	8580	11717
G372_RS0111800	0.0196622	0.0641949	-0.339927	0.145721	6.02491	0.0601465	0.0026006	0.0292512	0.0100107	0.0292512	bifunctional 2-polyprenyl-6-hydroxyphenol methylase/3-demethylubiquinol 3-O-methyltransferase UbiG	372	350	449	507	415	404
G372_RS0109755	0.0198936	0.0648715	0.208831	0.0896905	7.53639	0.0195218	0.000558914	0.00748944	0.0115077	0.0115077	sigma-54-dependent Fis family transcriptional regulator	2718	1747	2622	1472	1316	1799
G372_RS13825	0.0200135	0.0651833	-0.332066	0.142757	4.3992	0.0412859	0.0123849	-0.00212808	0.0181844	0.0181844	hypothetical protein	71.6073	67.661	91.3905	89.1385	67.735	104.681
G372_RS0107170	0.0202475	0.0658658	-0.616809	0.265668	5.91993	0.198831	0.00273659	0.103133	0.0101575	0.103133	50S ribosomal protein L27	344	345	237	352	326	819
G372_RS0102260	0.0204981	0.0666002	-0.339526	0.14653	5.53498	0.0603486	0.0036249	0.0285818	0.011039	0.0285818	tyrosine--tRNA ligase	265	224	226	218	215	416
G372_RS0112195	0.020549	0.0666849	-0.292187	0.126151	4.80772	0.0428301	0.00882427	0.0126983	0.0150469	0.0150469	undecaprenyl-diphosphate phosphatase	113	121	118	115	99	179
G372_RS0100220	0.0209207	0.0678095	-0.222736	0.096447	5.70569	0.0208458	0.00337857	0.00407441	0.0105745	0.0105745	glutamate-1-semialdehyde-2,1-aminomutase	300	291	306	294	275	338
G372_RS0102055	0.0210058	0.0678398	-0.350159	0.151723	7.30073	0.0644073	0.00069312	0.0338368	0.0108587	0.0338368	GatB/YqeY domain-containing protein	1496	1377	1288	1427	1136	2452
G372_RS13495	0.0209817	0.0678398	-0.2811	0.121777	5.15684	0.0415009	0.0052243	0.0170203	0.0126976	0.0170203	DUF2283 domain-containing protein	175	172	156	181	173	183
G372_RS14055	0.0209633	0.0678398	-0.443484	0.192097	4.05173	0.103285	0.0194607	0.0358913	0.0213784	0.0358913	hypothetical protein	60	32	68	62	65	65
G372_RS0111680	0.0210498	0.0679002	-0.289621	0.125535	4.75389	0.0344535	0.00821538	0.00339633	0.0154233	0.0154233	hypothetical protein	112	106	116	119	89	163
G372_RS0100520	0.0212894	0.0685907	-0.342197	0.1486	4.39598	0.0613136	0.0149111	0.0178188	0.0182117	0.0182117	phosphatidylserine decarboxylase	87	68	73	73	64	136
G372_RS0102875	0.0217273	0.0699177	-0.477026	0.207845	5.41351	0.120106	0.00460482	0.0601946	0.0114375	0.0601946	exodeoxyribonuclease III	235	182	177	188	203	436
G372_RS0100355	0.0217709	0.0699743	-0.368942	0.160805	5.94616	0.0718656	0.00249337	0.0362942	0.0101188	0.0362942	hypothetical protein	287	324	475	368	372	512
G372_RS0112090	0.0218384	0.0701072	-0.314501	0.137147	10.5366	0.0426909	2.59232e-05	0.0162462	0.028188	0.028188	flagellin	34032	34026	39793	45563	32567	41788
G372_RS0109195	0.0219529	0.0703909	-0.199329	0.0869982	6.37593	0.0152352	0.00168871	0.00245585	0.00966432	0.00966432	homoserine dehydrogenase	636	535	609	589	528	635
G372_RS0104910	0.0221391	0.0709032	-0.199266	0.0870928	6.34776	0.0141877	0.00169932	0.00114522	0.00967841	0.00967841	recombinase	595	482	664	576	466	676
G372_RS0108200	0.0227305	0.0727105	0.227137	0.0997118	6.32702	0.0274083	0.00187884	0.0130348	0.00969071	0.0130348	insulinase family protein	721	579	813	502	397	451
G372_RS0112610	0.0228699	0.0730696	-0.949437	0.417225	4.89004	0.479321	0.0083757	0.252739	0.0144924	0.252739	RNA polymerase-binding protein DksA	83	117	79	129	113	481
G372_RS0101600	0.0229844	0.0733482	-0.306562	0.13483	5.15393	0.0500089	0.00586708	0.0214015	0.0127157	0.0214015	DUF465 domain-containing protein	188	161	148	146	163	248
G372_RS0101230	0.0230337	0.0734172	-0.194846	0.0857269	6.59751	0.0123846	0.00134693	-0.000103087	0.00967671	0.00967671	4-alpha-glucanotransferase	768	680	777	723	615	858
G372_RS0110680	0.0230607	0.0734172	-0.341779	0.150403	6.68506	0.0621891	0.00127492	0.0326565	0.00973896	0.0326565	3-isopropylmalate dehydratase large subunit	923	591	776	787	595	1321
G372_RS0103280	0.023194	0.0737543	0.492131	0.216776	4.06514	0.129048	0.0202526	0.0502354	0.0212413	0.0502354	DUF1365 domain-containing protein	127	49	90	43	35	44
G372_RS0105675	0.0233921	0.0742961	0.216187	0.0953639	5.78346	0.0175114	0.00324459	0.0011183	0.0103968	0.0103968	bifunctional diaminohydroxyphosphoribosylaminopyrimidine deaminase/5-amino-6-(5-phosphoribosylamino)uracil reductase RibD	427	363	421	259	241	286
G372_RS0101440	0.0234842	0.0745005	0.195163	0.086147	6.94184	0.0184656	0.00106416	0.00773461	0.0100678	0.0100678	DUF4845 domain-containing protein	1372	1170	1276	907	750	878
G372_RS0110485	0.0235525	0.0746291	-0.212783	0.0939706	5.82907	0.0206293	0.00293749	0.00587043	0.0103082	0.0103082	aspartate carbamoyltransferase	386	263	387	358	260	419
G372_RS0106455	0.0236298	0.074786	-0.296513	0.131021	4.60751	0.0371165	0.00924541	0.00418023	0.0165044	0.0165044	hypothetical protein	111	84	94	87	97	133
G372_RS0109635	0.0236884	0.0747952	0.29859	0.131994	5.84792	0.0476538	0.00276939	0.0233643	0.0102744	0.0233643	50S ribosomal protein L11 methyltransferase	426	400	526	309	242	256
G372_RS0101490	0.0236757	0.0747952	-0.735347	0.325037	2.88861	0.288999	0.0690587	0.0894145	0.0402432	0.0894145	tRNA-Leu	14	12	14	22	11	49
G372_RS0112770	0.0240561	0.075867	-0.203733	0.0902981	6.00981	0.0207166	0.00219987	0.00813066	0.0100307	0.0100307	glycoside hydrolase family 15 protein	416	385	428	455	340	428
G372_RS0108170	0.0241202	0.07598	-0.222172	0.0985151	7.0046	0.0264544	0.000852965	0.0137049	0.01018	0.0137049	MerR family transcriptional regulator	1139	906	1281	1283	915	1149
G372_RS0113130	0.0244778	0.0770163	0.319612	0.142079	5.91859	0.0548692	0.00301676	0.0272628	0.0101595	0.0272628	flagellar basal body rod protein FlgB	400	518	552	291	236	334
G372_RS0113395	0.0245414	0.077126	-0.285648	0.127037	5.42751	0.0438444	0.00451177	0.0196957	0.011387	0.0196957	DUF2892 domain-containing protein	228	184	251	201	253	256
G372_RS13560	0.024713	0.0775745	-0.282265	0.125682	7.35063	0.0428573	0.000654281	0.0230398	0.0109895	0.0230398	TIGR00153 family protein	1823	1276	1467	1586	1125	2337
G372_RS0106190	0.0247608	0.0776338	0.246618	0.109847	5.1647	0.0220754	0.00545035	-0.000663796	0.0126491	0.0126491	LPS export ABC transporter periplasmic protein LptC	226	189	249	144	122	151
G372_RS13725	0.0248373	0.077783	0.239702	0.106822	6.12906	0.0309303	0.00238834	0.0147282	0.00987726	0.0147282	hypothetical protein	608	589	533	404	305	395
G372_RS0108195	0.0250762	0.0784398	0.378974	0.169168	4.59736	0.0774278	0.0100839	0.0328428	0.0165824	0.0328428	16S rRNA (guanine(966)-N(2))-methyltransferase RsmD	115	132	155	85	68	68
G372_RS0105800	0.0251545	0.0785801	-0.214131	0.095636	5.77511	0.0212332	0.00330518	0.00604173	0.0104142	0.0104142	HDOD domain-containing protein	321	259	401	319	272	383
G372_RS0111860	0.0251796	0.0785801	0.195109	0.0871553	7.17173	0.0205355	0.000842366	0.0105517	0.0105369	0.0105517	ribosome recycling factor	1743	1322	1772	1186	928	1082
G372_RS0106265	0.0252099	0.0785836	-0.389395	0.173979	3.7526	0.0495576	0.0205826	-0.0154962	0.0248205	0.0248205	SOS response-associated peptidase	44.1497	35	37	48	37	55
G372_RS0100125	0.0252538	0.0786291	0.358198	0.160088	6.62346	0.0692456	0.00148093	0.0369615	0.00969241	0.0369615	DUF2384 domain-containing protein	1454.79	693	997.877	605.635	461	644
G372_RS0106460	0.025359	0.0788654	0.418887	0.187347	3.75103	0.0613463	0.0278075	-0.0169243	0.0248407	0.0248407	leucyl/phenylalanyl-tRNA--protein transferase	55	49	72	30	25	38
G372_RS0111305	0.0254969	0.0791112	-0.352839	0.157955	4.09205	0.045832	0.0164541	-0.00584992	0.0209707	0.0209707	PEP-CTERM/exosortase system-associated acyltransferase	55	55	56	68	55	69
G372_RS0111510	0.0254697	0.0791112	0.24408	0.109247	5.22168	0.0207077	0.005589	-0.00204508	0.0123134	0.0123134	YggW family oxidoreductase	244	199	259	158	117	171
G372_RS0105320	0.0256389	0.0794599	-0.318818	0.142863	5.35081	0.0549852	0.00546759	0.0251471	0.0116826	0.0251471	GntP family permease	222	169	212	171	188	338
G372_RS0112505	0.02581	0.0798981	0.28355	0.127206	5.56561	0.0435378	0.00422029	0.0200518	0.0109501	0.0200518	transcriptional regulator	451	271	307	218	178	216
G372_RS0103300	0.025846	0.0799173	0.336501	0.150997	6.32344	0.0613301	0.0018627	0.0323377	0.00969299	0.0323377	GTP cyclohydrolase I FolE	995	550	723	422	300	596
G372_RS0101930	0.0263167	0.0812792	0.202371	0.0910961	6.04577	0.0159184	0.00246443	0.00207587	0.00998332	0.00998332	translocation/assembly module TamB	558	432	583	343	265	441
G372_RS0112165	0.0264117	0.0814791	0.258343	0.116365	5.05955	0.0362714	0.00687636	0.013435	0.0133317	0.013435	DUF1992 domain-containing protein	267	147	201	118	111	145
G372_RS0105670	0.0265392	0.0815913	-0.275154	0.124042	4.81844	0.0381237	0.00810651	0.0111569	0.0149732	0.0149732	riboflavin synthase	126	118	115	131	90	174
G372_RS0109690	0.026521	0.0815913	0.302038	0.136145	5.49404	0.0496107	0.00525628	0.022547	0.0111642	0.022547	potassium/proton antiporter	340	279	328	162	138	294
G372_RS0109905	0.0265316	0.0815913	0.207684	0.0936215	6.98857	0.0234578	0.000775019	0.0123724	0.0101502	0.0123724	RNA polymerase-binding protein DksA	1392	1129	1528	1004	748	898
G372_RS0102980	0.0266076	0.0817081	-0.189589	0.0855071	6.9812	0.0147556	0.000830478	0.00413503	0.0101367	0.0101367	type IV pilus biogenesis/stability protein PilW	1159	925	1207	1170	860	1190
G372_RS0104625	0.0266527	0.0817533	0.216715	0.0977707	5.66855	0.0193117	0.00366781	0.00285974	0.0106709	0.0106709	sigma-54-dependent Fis family transcriptional regulator	363	349	365	246	186	276
G372_RS0111740	0.026759	0.0819855	-0.282694	0.127626	5.54655	0.043521	0.00368587	0.0207468	0.011005	0.0207468	3'(2'),5'-bisphosphate nucleotidase	290	222	235	230	203	397
G372_RS0105140	0.0270523	0.0827898	0.258868	0.117094	5.56926	0.0365571	0.00416309	0.0164036	0.0109397	0.0164036	PilZ domain-containing protein	356	258	398	182	211	229
G372_RS0111505	0.0273022	0.0834597	-0.325544	0.147494	4.36585	0.0432948	0.0141633	0.000213152	0.0184684	0.0184684	non-canonical purine NTP pyrophosphatase, RdgB/HAM1 family	78	64	81	68	73	114
G372_RS0101820	0.0273935	0.083568	-0.234928	0.106501	5.31225	0.021221	0.00516314	0.000666493	0.0118507	0.0118507	flagellar hook-length control protein FliK	229	172	204	202	157	269
G372_RS0106535	0.0274139	0.083568	-0.308899	0.140054	4.75744	0.0521638	0.00927115	0.0201515	0.0153981	0.0201515	MFS transporter	130	80	130	129	118	118
G372_RS0106890	0.027431	0.083568	0.22329	0.10125	5.81654	0.0272594	0.00319188	0.0121855	0.0103316	0.0121855	nicotinate-nucleotide adenylyltransferase	449	338	480	290	251	268
G372_RS0106570	0.0274997	0.0836825	-0.234492	0.106377	5.88884	0.0300752	0.00291661	0.0140574	0.0102058	0.0140574	hypothetical protein	423	278	387	311	304	510
G372_RS0102890	0.0276206	0.0839553	1.30092	0.590618	7.79383	0.92631	0.000736168	0.522508	0.0123102	0.522508	peptidyl-prolyl cis-trans isomerase	7327	3513	5390	501	714	4096
G372_RS0108685	0.027735	0.0842078	-0.337507	0.153341	4.14588	0.0547989	0.0148249	0.0109573	0.0204455	0.0204455	DUF2905 domain-containing protein	58	51	69	52	62	92
G372_RS0103135	0.0280389	0.0850345	0.233604	0.106341	5.29974	0.028702	0.00505403	0.0103593	0.0119087	0.0119087	dihydropteroate synthase	291	203	265	190	125	171
G372_RS0105505	0.0282863	0.085688	-0.47959	0.218662	5.1814	0.126378	0.00577045	0.0659491	0.0125477	0.0659491	histidine triad nucleotide-binding protein	173	133	163	163	136	375
G372_RS0113375	0.0284999	0.0862377	-0.476449	0.217523	6.23441	0.124881	0.00209746	0.068877	0.00976377	0.068877	heme-binding protein	546	319	513	391	578	866
G372_RS0105285	0.0286351	0.0865495	0.252979	0.115596	6.07937	0.0352345	0.00236639	0.0176773	0.00993964	0.0176773	ketoacyl-ACP synthase III	578	510	569	398	311	332
G372_RS0100320	0.0290967	0.0878432	0.186505	0.0854674	6.63196	0.0151537	0.00125895	0.00463923	0.00969806	0.00969806	tRNA guanosine(34) transglycosylase Tgt	1072	836	890	617	555	697
G372_RS13780	0.0291285	0.0878432	0.337242	0.154575	4.73987	0.0627917	0.0117228	0.0241172	0.0155232	0.0241172	glyoxalase/bleomycin resistance/dioxygenase family protein	202.997	124.731	134.046	69.804	80.4491	114.593
G372_RS0110475	0.0292146	0.088004	0.210201	0.0963971	5.66857	0.0167239	0.0032678	0.00106777	0.0106708	0.0106708	urea transporter	405	296	382	241	180	294
G372_RS0104650	0.0293448	0.0882972	-0.233292	0.107072	5.26276	0.0214406	0.0051051	0.00128628	0.0120916	0.0120916	phospholipase D	205	184	184	189	174	223
G372_RS0102135	0.029555	0.0888302	-0.515922	0.237096	6.6134	0.14731	0.00144198	0.0828798	0.00968605	0.0828798	30S ribosomal protein S16	697	697	541	696	606	1536
G372_RS0106390	0.0296836	0.0891172	0.269481	0.12394	4.82386	0.0368415	0.00810555	0.0107138	0.0149362	0.0149362	KR domain-containing protein	145	163	167	108	78	109
G372_RS0106300	0.0298399	0.0894864	-0.903691	0.416024	2.11221	0.369051	0.194673	-0.0396053	0.0649408	0.0649408	hypothetical protein	6	8	3	11	8	16
G372_RS0108830	0.0299216	0.0896313	0.407774	0.187817	8.52284	0.0922139	0.000212129	0.0527005	0.0151582	0.0527005	ATP-dependent Clp protease ATP-binding subunit ClpX	7719	5252	7986	4891	3173	3215
G372_RS0108565	0.0299611	0.0896498	-0.357593	0.164744	5.42604	0.0709305	0.00468199	0.0360288	0.0113923	0.0360288	ATP-grasp domain-containing protein	231	169	241	187	198	390
G372_RS0104360	0.0301207	0.0898273	-0.393059	0.181258	3.73959	0.0648273	0.0242937	-0.0011953	0.0249882	0.0249882	oxidoreductase	43	31	41	57	36	46
G372_RS0106835	0.0301191	0.0898273	0.313584	0.144608	4.43416	0.0351448	0.0134759	-0.00642061	0.0178911	0.0178911	DUF938 domain-containing protein	130	85	118	61	53	82
G372_RS0111270	0.0301092	0.0898273	-0.292865	0.135045	4.55696	0.0357115	0.0104586	0.0020171	0.016897	0.016897	polysaccharide deacetylase family protein	104	75	97	100	71	135
G372_RS0102895	0.0302576	0.0901354	1.20459	0.555954	7.39253	0.80621	0.000972791	0.462654	0.011102	0.462654	hypothetical protein	4616	2211	3529	401	461	2746
G372_RS0104455	0.0303475	0.0903031	0.267461	0.123508	5.8107	0.0397657	0.00278593	0.0200955	0.0103427	0.0200955	hypothetical protein	361	413	513	267	208	323
G372_RS0102665	0.0305945	0.0909374	0.27534	0.127336	4.79821	0.0346749	0.00920923	0.00570493	0.0151125	0.0151125	Lrp/AsnC family transcriptional regulator	178	117	177	108	75	104
G372_RS0108405	0.0310251	0.0921153	0.190493	0.0883239	7.38238	0.0142921	0.000627137	0.00363019	0.0110745	0.0110745	twin-arginine translocase subunit TatB	2240	1585	2149	1310	1037	1661
G372_RS0103320	0.0313017	0.092834	0.315913	0.146717	5.15014	0.0557713	0.00581149	0.0264772	0.0127393	0.0264772	electron transport complex subunit RsxG	238	184	258	155	124	119
G372_RS0100415	0.0314225	0.0930897	-0.323039	0.150133	4.8773	0.0583542	0.00704919	0.0267608	0.0145771	0.0267608	SsrA-binding protein SmpB	116	125	131	126	99	211
G372_RS0111765	0.031563	0.0932999	-0.202384	0.0941363	5.78495	0.0215827	0.0028987	0.00871997	0.0103938	0.0103938	oxoacyl-ACP reductase	302	326	355	313	285	377
G372_RS0112890	0.0315524	0.0932999	0.219495	0.102089	5.48501	0.0198186	0.00444037	0.00226608	0.0111929	0.0111929	thioredoxin	354	267	283	198	155	236
G372_RS0102095	0.0316683	0.0934058	1.15078	0.535604	4.31702	0.741538	0.0189779	0.41133	0.0188913	0.41133	23S rRNA (adenine(2030)-N(6))-methyltransferase RlmJ	145	136	164	13	41	97
G372_RS0113295	0.0316651	0.0934058	0.322614	0.15015	4.26969	0.0390616	0.0145082	-0.00471127	0.0193093	0.0193093	phosphate regulon transcriptional regulatory protein PhoB	108	81	92	47	47	72
G372_RS0104815	0.0317183	0.0934507	-0.185621	0.0864178	6.56128	0.014708	0.00154335	0.00392101	0.00965871	0.00965871	LysM peptidoglycan-binding domain-containing protein	842	627	699	650	586	886
G372_RS0110725	0.0317952	0.0935748	-0.237643	0.110688	5.15948	0.029035	0.00569641	0.00941949	0.0126812	0.0126812	hypothetical protein	203	127	196	162	167	200
G372_RS0101740	0.0319491	0.0939248	-0.198716	0.0926396	7.83767	0.0169676	0.000416203	0.00598522	0.0124569	0.0124569	DNA gyrase subunit A	2741	2459	2475	2513	1995	3164
G372_RS13740	0.0321542	0.0944244	-1.81882	0.848929	1.06136	1.82221	0.953078	0.0841434	0.127942	0.127942	glyoxalase/bleomycin resistance/dioxygenase family protein	6.72324	0.00975149	0.00970852	6.35763	4.20342	8.04383
G372_RS13480	0.0326698	0.0958336	0.363281	0.170066	3.97674	0.0622895	0.0212133	0.0071586	0.0221704	0.0221704	diguanylate cyclase	89	64	62	36	30	57
G372_RS0107840	0.0329095	0.0964316	0.954648	0.447522	5.67526	0.513737	0.00409359	0.29632	0.0106533	0.29632	hypothetical protein	598	457	523	366	122	95
G372_RS0100180	0.0330365	0.0965931	-0.418734	0.196438	3.52984	0.0695886	0.029955	-0.00872116	0.0279266	0.0279266	GNAT family N-acetyltransferase	35	24	33	37	26	54
G372_RS0105600	0.0330106	0.0965931	-0.572559	0.268561	6.68269	0.184897	0.00133822	0.106849	0.00973693	0.106849	DUF302 domain-containing protein	445	644	1037	973	922	968
G372_RS0105745	0.0334334	0.0976129	0.231704	0.108943	5.26757	0.0233054	0.005736	0.00326313	0.0120669	0.0120669	thioredoxin domain-containing protein	245	242	239	152	139	175
G372_RS0109640	0.0334579	0.0976129	0.395239	0.18586	3.81629	0.0871097	0.0277937	0.0225132	0.024022	0.024022	hypothetical protein	66	64	54	25	36	40
G372_RS0102155	0.034394	0.100235	0.249833	0.118101	5.01972	0.0330509	0.00731799	0.0105895	0.0136037	0.0136037	DNA repair protein RadA	193	162	221	143	97	123
G372_RS0101845	0.0344552	0.100305	-0.212913	0.100682	5.43141	0.0237782	0.00383218	0.00889116	0.0113732	0.0113732	hypothetical protein	245	191	254	249	208	228
G372_RS0111620	0.0344989	0.100323	-0.187323	0.0886027	7.04633	0.0199475	0.000850832	0.0109248	0.0102612	0.0109248	PAS domain S-box protein	1308	856	1410	1129	967	1329
G372_RS0111660	0.0346534	0.100663	0.416106	0.196984	3.56823	0.087675	0.0308493	0.0138153	0.0273546	0.0273546	DNA-deoxyinosine glycosylase	59	33	57	21	20	39
G372_RS0105855	0.0347978	0.100974	0.203513	0.0964197	5.69426	0.0172878	0.00334126	0.00273682	0.0106039	0.0106039	bifunctional D-glycero-beta-D-manno-heptose-7-phosphate kinase/D-glycero-beta-D-manno-heptose 1-phosphate adenylyltransferase HldE	359	336	406	257	190	285
G372_RS0111260	0.0351888	0.101998	-0.267986	0.127238	4.73951	0.0285985	0.00875849	5.83293e-05	0.0155258	0.0155258	sugar transferase	131	100	104	112	94	152
G372_RS0111895	0.0353356	0.102313	0.203069	0.0964933	7.11778	0.0235443	0.000845785	0.0131207	0.0104125	0.0131207	UDP-3-O-(3-hydroxymyristoyl)glucosamine N-acyltransferase	1763	1229	1622	892	789	1422
G372_RS0101920	0.035743	0.103382	-0.293934	0.139979	4.45226	0.033155	0.0116502	-0.00260532	0.0177411	0.0177411	ABC transporter ATP-binding protein	82	79	85	91	81	95
G372_RS0101945	0.0359189	0.103691	0.6781	0.323236	8.4091	0.263324	0.000232966	0.15649	0.0146546	0.15649	chaperonin GroEL	6343	7263	7494	5213	1939	2339
G372_RS0109270	0.0359271	0.103691	0.313145	0.149277	4.36376	0.040271	0.014939	-0.00137273	0.0184863	0.0184863	NUDIX domain-containing protein	95	94	118	57	57	66
G372_RS0111610	0.0361733	0.104289	-0.583328	0.278442	5.43611	0.195117	0.00469741	0.111597	0.0113566	0.111597	complex I NDUFA9 subunit family protein	231	188	159	192	203	536
G372_RS0102015	0.0363141	0.104583	-0.184116	0.0879509	7.26948	0.0165699	0.000824439	0.0071759	0.0107786	0.0107786	pilus assembly protein PilP	1492	1167	1780	1399	1147	1758
G372_RS0104630	0.0367056	0.105597	0.266417	0.127532	5.47556	0.0408107	0.00440298	0.0199936	0.0112235	0.0199936	sensor histidine kinase	357	296	264	177	142	261
G372_RS0102100	0.036899	0.10604	1.18276	0.566759	7.54341	0.805133	0.000819166	0.481004	0.0115283	0.481004	sulfur oxidation c-type cytochrome SoxX	3780	3513	4128	338	846	2885
G372_RS0100145	0.037044	0.106343	-0.200371	0.0960881	5.74248	0.0230522	0.00336357	0.0103961	0.0104858	0.0104858	replication initiation protein	325	263	361	364	235	345
G372_RS0101290	0.0371429	0.106513	-0.272562	0.130776	4.89509	0.0428098	0.00842297	0.0172305	0.0144586	0.0172305	glycosyltransferase family 2 protein	132	127	129	169	97	157
G372_RS0109205	0.0372414	0.106634	0.196626	0.0943909	5.86142	0.0167765	0.00311338	0.00335896	0.0102511	0.0102511	hypothetical protein	498	340	473	265	237	370
G372_RS0113360	0.0372644	0.106634	-0.388643	0.186591	6.12916	0.0870925	0.00218573	0.0500387	0.00987714	0.0500387	peptide chain release factor 2	490	383	396	445	333	844
G372_RS0102700	0.037401	0.106911	-0.19382	0.0931217	5.90473	0.0185476	0.00282671	0.00627053	0.0101808	0.0101808	magnesium transporter	400	287	442	353	288	468
G372_RS0113315	0.0374562	0.106955	0.403979	0.19415	3.56583	0.0808052	0.0291515	0.0106552	0.0273899	0.0273899	hypothetical protein	46	49	48	30	24	23
G372_RS0103625	0.0375997	0.107251	0.254161	0.12224	4.86885	0.0215856	0.00778077	-0.00502292	0.0146332	0.0146332	DUF1007 domain-containing protein	175	141	179	107	89	113
G372_RS0105020	0.0379414	0.107996	-0.768493	0.370271	5.39718	0.341696	0.00484292	0.200808	0.0114983	0.200808	hypothetical protein	151	148	208	447	321	171
G372_RS0110150	0.0379289	0.107996	-0.236216	0.113805	7.27043	0.0322814	0.000703801	0.0187236	0.010781	0.0187236	phosphoribulokinase	1388	1300	1593	1585	1363	1416
G372_RS0100360	0.0380297	0.108133	-0.266875	0.128643	4.71597	0.0405374	0.00912836	0.014835	0.0156953	0.0156953	DUF455 domain-containing protein	97	104	126	107	114	122
G372_RS13805	0.0382395	0.108615	0.346764	0.167335	11.9561	0.068337	6.35735e-06	0.0403229	0.041995	0.041995	transfer-messenger RNA ssrA	237488	137155	269720	137262	94315	125607
G372_RS0112915	0.0384149	0.108998	0.267277	0.129094	4.71191	0.0322552	0.00927314	0.00425701	0.0157248	0.0157248	hypothetical protein	179	106	148	86	78	98
G372_RS0109910	0.0386383	0.109516	-0.375002	0.181334	4.56774	0.0816462	0.00968294	0.0396399	0.0168125	0.0396399	phosphoesterase	116	85	70	97	76	152
G372_RS0106215	0.0387107	0.109606	0.190829	0.0923105	6.99958	0.0211501	0.000952426	0.0118294	0.0101705	0.0118294	PTS sugar transporter subunit IIA	1220	1305	1520	836	776	1102
G372_RS0100185	0.0394758	0.111171	-0.284209	0.13802	5.25085	0.0470917	0.00572969	0.0228444	0.012154	0.0228444	histidine phosphatase family protein	159	199	196	175	176	248
G372_RS0101510	0.0393107	0.111171	-0.803279	0.389767	5.99381	0.375879	0.00304797	0.22483	0.0100523	0.22483	30S ribosomal protein S6	321	361	229	367	333	1270
G372_RS0103000	0.039528	0.111171	-0.287362	0.139588	8.00431	0.0481547	0.000345015	0.0288821	0.0130425	0.0288821	polyribonucleotide nucleotidyltransferase	3379	2775	2568	3430	2907	2996
G372_RS0103875	0.039406	0.111171	0.410886	0.199467	3.47693	0.0583263	0.0309387	-0.021341	0.0287418	0.0287418	aminoacyl-tRNA hydrolase	53	35	45	25	20	25
G372_RS0108730	0.0395531	0.111171	0.239262	0.116238	5.04288	0.0266112	0.00682179	0.00497483	0.013445	0.013445	DnaA regulatory inactivator Hda	190	164	234	136	102	134
G372_RS0109525	0.0393671	0.111171	-0.21481	0.10426	8.73221	0.0225581	0.000159672	0.0107342	0.0161455	0.0161455	30S ribosomal protein S1	6256	6338	6014	6417	4988	7434
G372_RS0110720	0.0394959	0.111171	-0.287152	0.139463	5.35839	0.0480767	0.00496302	0.0242118	0.0116512	0.0242118	daunorubicin resistance protein DrrA family ABC transporter ATP-binding protein	207	151	273	191	185	300
G372_RS0102985	0.0398191	0.111685	-0.186076	0.0905205	7.63696	0.0128912	0.000481656	0.00264823	0.0118093	0.0118093	bifunctional tRNA (adenosine(37)-C2)-methyltransferase TrmG/ribosomal RNA large subunit methyltransferase RlmN	2383	1817	2150	2118	1600	2515
G372_RS0112760	0.0397945	0.111685	-0.188352	0.0916165	5.96056	0.013165	0.00249214	0.000660344	0.0100982	0.0100982	DUF4440 domain-containing protein	414	353	414	348	332	483
G372_RS0112425	0.0402233	0.112701	-0.508045	0.247652	6.19895	0.151031	0.00224946	0.0897478	0.00979875	0.0897478	class I SAM-dependent methyltransferase	516	461	322	483	393	972
G372_RS0108410	0.040617	0.113685	0.17499	0.0854684	6.86721	0.0112438	0.00100687	0.00156485	0.0099504	0.0099504	twin-arginine translocase TatA/TatE family subunit	1232	1012	1274	768	630	1017
G372_RS0112270	0.0406705	0.113717	0.181995	0.0889138	6.20448	0.0131271	0.00206544	0.00192255	0.00979306	0.00979306	RepB family plasmid replication initiator protein	712	481	641	409	337	483
G372_RS0108185	0.0407269	0.113756	0.181918	0.0889008	6.18836	0.0123857	0.00204517	0.00102672	0.00980987	0.00980987	NAD(P)-dependent oxidoreductase	596	516	680	406	336	465
G372_RS0105005	0.0409358	0.114221	-0.350536	0.17148	3.88931	0.0407105	0.0209563	-0.0161467	0.0231519	0.0231519	rhodanese-like domain-containing protein	54	37	46	54	43	60
G372_RS0102435	0.0410712	0.11448	0.449646	0.220112	5.23755	0.118793	0.00620288	0.0664708	0.0122256	0.0664708	phospho-N-acetylmuramoyl-pentapeptide-transferase	298	203	297	135	78	231
G372_RS0107195	0.0419045	0.116681	-0.187422	0.0921234	6.92378	0.0207222	0.00103916	0.0116909	0.0100378	0.0116909	DNA-directed RNA polymerase subunit omega	983	861	1291	1045	856	1123
G372_RS0103100	0.0421771	0.117319	0.226033	0.11125	6.43808	0.0301791	0.00142481	0.0171399	0.00964469	0.0171399	NADH-quinone oxidoreductase subunit C	806	739	794	555	464	488
G372_RS0112140	0.0428502	0.119068	-0.174239	0.0860367	6.6679	0.0169554	0.00137878	0.00843075	0.0097247	0.0097247	methyltransferase domain-containing protein	786	784	839	832	653	841
G372_RS0110255	0.0429045	0.119095	0.360456	0.178035	8.80388	0.0770141	0.000160798	0.0473837	0.0165019	0.0473837	F0F1 ATP synthase subunit beta	7487	8540	10960	5960	4455	4688
G372_RS0112490	0.043162	0.119687	-0.795317	0.393305	4.32793	0.375385	0.0151708	0.216862	0.0187961	0.216862	inositol monophosphatase	74	52	46	58	72	245
G372_RS0109030	0.0432208	0.119726	0.380171	0.188057	3.68245	0.059314	0.027304	-0.00736028	0.0257445	0.0257445	D-2-hydroxyacid dehydrogenase	59	45	56	23	26	41
G372_RS0106990	0.0433763	0.120033	0.186388	0.0922681	5.98549	0.0152743	0.00270652	0.00335862	0.0100636	0.0100636	3-methyl-2-oxobutanoate hydroxymethyltransferase	494	426	544	312	305	360
G372_RS0106855	0.0436517	0.120547	-0.182667	0.090545	7.48929	0.0198483	0.000606329	0.0116913	0.0113715	0.0116913	phosphoenolpyruvate carboxylase	1949	1688	1826	1787	1272	2395
G372_RS0110630	0.0436253	0.120547	0.174167	0.0863205	6.88284	0.011273	0.0012033	0.00151273	0.00997355	0.00997355	acetyl-CoA carboxylase carboxyltransferase subunit beta	1327	1027	1220	841	631	973
G372_RS0107765	0.043725	0.120625	-0.244451	0.121213	4.91103	0.0300932	0.00768756	0.0075203	0.0143512	0.0143512	Na/Pi cotransporter family protein	163	106	137	126	107	192
G372_RS0102190	0.0440861	0.121497	0.22267	0.110601	5.596	0.0295537	0.00346807	0.0148808	0.010865	0.0148808	1-deoxy-D-xylulose-5-phosphate synthase	347	318	340	253	185	215
G372_RS0108145	0.0441552	0.121563	-0.678995	0.337369	3.77486	0.274892	0.0255489	0.145178	0.0245371	0.145178	tRNA-Glu	42	36	26	52	28	111
G372_RS0102295	0.0442749	0.121767	0.200104	0.0994812	5.61418	0.0162523	0.00402941	0.00127033	0.0108153	0.0108153	CopD family protein	365	318	330	231	175	272
G372_RS0110085	0.0443724	0.121911	0.178016	0.0885406	6.25931	0.01135	0.00201776	0.000286127	0.0097414	0.0097414	4-hydroxy-3-methylbut-2-enyl diphosphate reductase	712	545	663	397	369	539
G372_RS0102215	0.0445138	0.122174	-0.172067	0.0856385	6.85643	0.0144295	0.00106603	0.00586831	0.00993491	0.00993491	4-hydroxy-tetrahydrodipicolinate synthase	972	937	1003	859	780	1197
G372_RS0105500	0.0447842	0.122791	-0.178264	0.0888355	7.47019	0.0145493	0.000520335	0.00574949	0.0113173	0.0113173	hypothetical protein	2089	1454	1880	1748	1559	1874
G372_RS0102285	0.0451209	0.123588	0.195444	0.09755	5.66163	0.0170351	0.00358501	0.0033845	0.010689	0.010689	N-acetyl-gamma-glutamyl-phosphate reductase	371	334	354	209	203	301
G372_RS0110460	0.0452159	0.123722	0.264413	0.132032	5.07661	0.0418933	0.00600846	0.0201403	0.0132168	0.0201403	hypothetical protein	216	178	218	129	83	185
G372_RS0106510	0.0453888	0.124069	-0.231276	0.115578	5.64711	0.0320767	0.0033526	0.016685	0.0107273	0.016685	hypothetical protein	309	213	336	332	237	295
G372_RS0107515	0.0455772	0.124079	-0.979209	0.489779	8.3326	0.575515	0.000287825	0.359537	0.0143287	0.359537	hypothetical protein	4078	2180	2569	2380	7395	12831
G372_RS0107740	0.0455483	0.124079	-0.350406	0.175242	5.55807	0.0736869	0.00369257	0.042372	0.0109717	0.042372	divalent metal cation transporter	317	222	201	256	199	417
G372_RS0109585	0.0454823	0.124079	0.189345	0.0946646	5.76	0.0167253	0.00299551	0.00446674	0.0104466	0.0104466	hypothetical protein	434	357	377	250	202	343
G372_RS0112510	0.0455056	0.124079	0.373945	0.186977	6.92391	0.0839029	0.00112037	0.0513203	0.010038	0.0513203	IscS subfamily cysteine desulfurase	1617	1201	1307	1060	575	710
G372_RS0109170	0.045665	0.124192	-0.221037	0.110603	5.15466	0.0269269	0.00563835	0.00969871	0.0127111	0.0127111	DedA family protein	204	149	168	188	159	174
G372_RS0107495	0.0461358	0.125346	-0.17604	0.0882782	7.39017	0.0120546	0.000593908	0.00285305	0.0110956	0.0110956	radical SAM protein	1834	1501	1637	1623	1385	1781
G372_RS0102900	0.0463298	0.125746	1.45128	0.728417	9.13274	1.26858	0.000230878	0.795657	0.0182612	0.795657	adenylyl-sulfate reductase subunit alpha	25792	15883	23566	1226	2949	17975
G372_RS0109800	0.0465589	0.126098	-0.171567	0.0862022	7.10313	0.0157875	0.000765936	0.00793016	0.0103803	0.0103803	DNA topoisomerase I	1461	1154	1137	1190	982	1438
G372_RS0111175	0.0466004	0.126098	-0.228128	0.114642	4.99929	0.0224362	0.00596979	0.00255956	0.0137445	0.0137445	acyl-CoA ligase (AMP-forming), exosortase A system-associated	180	118	149	147	135	166
G372_RS14090	0.046589	0.126098	0.31166	0.156612	5.91473	0.0585721	0.00431678	0.032474	0.0101654	0.032474	glyoxalase/bleomycin resistance/dioxygenase family protein	666.942	406.304	412.257	245.136	240.1	389.841
G372_RS0100475	0.0468009	0.126399	-0.312751	0.157312	6.21344	0.0590405	0.00223697	0.0348836	0.00978403	0.0348836	UDP-N-acetylglucosamine 1-carboxyvinyltransferase	557	416	463	430	397	842
G372_RS0111450	0.0468058	0.126399	-0.26595	0.133774	4.64832	0.0297836	0.0106486	5.74569e-05	0.0161946	0.0161946	A/G-specific adenine glycosylase	108	89	108	105	78	148
G372_RS0113310	0.0468872	0.126492	-0.170507	0.0857974	6.59502	0.0160418	0.00136647	0.00778353	0.00967533	0.00967533	diguanylate cyclase	798	687	762	612	647	922
G372_RS0112360	0.0472941	0.127462	0.220168	0.110991	5.1856	0.0282819	0.00595595	0.0112188	0.0125225	0.0125225	ABC transporter permease	221	228	216	157	124	151
G372_RS0108530	0.0473993	0.127617	0.278307	0.140367	5.20312	0.0468798	0.00559872	0.0239555	0.0124194	0.0239555	hypothetical protein	286	199	220	115	117	211
G372_RS0105130	0.0475499	0.127767	-0.245134	0.123719	5.39202	0.036395	0.00506007	0.0178997	0.0115179	0.0178997	exodeoxyribonuclease V subunit alpha	241	154	271	243	192	236
G372_RS0111760	0.0475102	0.127767	0.190982	0.0963715	5.77361	0.0220872	0.00312241	0.0108088	0.0104173	0.0108088	YgiQ family radical SAM protein	393	399	389	237	217	350
G372_RS0101265	0.0476616	0.127852	0.250125	0.126302	4.82608	0.0239895	0.00900718	-0.00248127	0.0149211	0.0149211	type II toxin-antitoxin system prevent-host-death family antitoxin	151	142	180	94	81	125
G372_RS0104295	0.0476767	0.127852	-0.302221	0.152618	4.1522	0.0388573	0.0145532	-0.000233148	0.0203853	0.0203853	lysylphosphatidylglycerol synthetase family protein	69	60	53	64	56	80
G372_RS0103700	0.0478503	0.128189	-0.34255	0.173119	3.88825	0.0484761	0.0217912	-0.00519889	0.0231642	0.0231642	endonuclease III	48	42	46	42	46	71
G372_RS0103390	0.0480667	0.128641	0.168927	0.0854558	6.9386	0.0106605	0.0008917	0.00173277	0.0100623	0.0100623	ketol-acid reductoisomerase	1335	1110	1316	899	667	1026
G372_RS0110030	0.0482748	0.129069	-0.22868	0.115791	5.05947	0.030423	0.00677898	0.0116393	0.0133323	0.0133323	MFS transporter	188	112	180	157	121	208
G372_RS13870	0.0486771	0.130015	0.233147	0.118264	6.23238	0.033091	0.00219692	0.0187827	0.00976567	0.0187827	nucleotidyltransferase domain-containing protein	678	511	744	473	357	397
G372_RS0105650	0.0487529	0.130088	0.253114	0.128436	5.26632	0.039015	0.00505347	0.0196902	0.0120733	0.0196902	succinate dehydrogenase, cytochrome b556 subunit	236	234	264	189	111	170
G372_RS0104035	0.0491877	0.131119	0.173379	0.0881459	7.327	0.017846	0.000727415	0.0103074	0.0109271	0.0109271	HDOD domain-containing protein	1941	1455	2230	1319	1106	1344
G372_RS0101085	0.0496602	0.132247	-0.236805	0.120641	4.94111	0.0197091	0.00768565	-0.00407789	0.0141459	0.0141459	EF-P beta-lysylation protein EpmB	145	123	147	142	109	181
G372_RS0109300	0.0498726	0.132681	-0.230623	0.117601	5.42628	0.0325521	0.00431299	0.0164321	0.0113914	0.0164321	3-oxoacyl-ACP reductase FabG	228	238	210	213	219	256
G372_RS0110285	0.0500846	0.133046	-0.814017	0.415476	6.67809	0.405931	0.00150705	0.257423	0.00973305	0.257423	F0F1 ATP synthase subunit A	546	780	479	701	673	2608
G372_RS0113145	0.0501087	0.133046	0.26934	0.137486	7.62182	0.0444461	0.000548036	0.0278056	0.0117629	0.0278056	flagellar hook protein FlgE	2190	2634	3054	1770	1298	1790
G372_RS0100695	0.0503264	0.133492	-0.242595	0.123952	6.15536	0.0360926	0.0020073	0.0210387	0.00984634	0.0210387	dihydroorotate dehydrogenase	567	405	436	394	408	676
G372_RS0103240	0.0509082	0.134902	-0.187666	0.0961279	5.73371	0.0190262	0.0033547	0.0072211	0.0105062	0.0105062	Xaa-Pro aminopeptidase	292	289	363	326	243	356
G372_RS0108180	0.0510606	0.135137	-0.18302	0.0938097	7.94126	0.0163956	0.000384673	0.00754869	0.0128157	0.0128157	glycogen/starch/alpha-glucan phosphorylase	2883	2391	3381	2930	2398	3009
G372_RS0108400	0.0510974	0.135137	0.167274	0.0857523	6.76899	0.0125391	0.00120728	0.00397392	0.00982292	0.00982292	twin-arginine translocase subunit TatC	1129	951	1089	647	605	947
G372_RS0111795	0.0514329	0.13589	-0.206462	0.105995	5.28332	0.0226366	0.00486445	0.00744641	0.0119879	0.0119879	phosphoglycolate phosphatase	212	148	245	200	168	223
G372_RS0104610	0.0515114	0.135964	0.319307	0.163983	4.006	0.0371973	0.0184798	-0.0102172	0.021856	0.021856	hypothetical protein	85	59	72	37	36	54
G372_RS0106490	0.0516176	0.13611	-0.603531	0.31009	4.59214	0.224662	0.0123558	0.131878	0.0166227	0.131878	hypothetical protein	94.0989	72.2203	77.4553	72.0968	94.2138	250.268
G372_RS0109545	0.0518521	0.136526	0.166319	0.085539	6.7858	0.0109348	0.00113286	0.00216247	0.00984252	0.00984252	histidinol-phosphate transaminase	1151	998	1069	763	607	843
G372_RS0110080	0.0518768	0.136526	-0.269726	0.138737	4.5296	0.0433092	0.0117584	0.0150959	0.0171135	0.0171135	formyltetrahydrofolate deformylase	98	92	80	82	77	135
G372_RS0108000	0.05222	0.137295	0.25493	0.131318	4.61586	0.0276628	0.00942612	0.000781495	0.0164405	0.0164405	TIGR02444 family protein	117	120	147	76	68	97
G372_RS0101145	0.0525525	0.137854	-0.326982	0.168671	4.88204	0.0662151	0.00741172	0.0352631	0.0145457	0.0352631	hypothetical protein	129	128	116	124	98	221
G372_RS0107205	0.0525053	0.137854	0.229195	0.118205	4.95791	0.0308345	0.00692829	0.0119158	0.0140303	0.0140303	bifunctional DNA-formamidopyrimidine glycosylase/DNA-(apurinic or apyrimidinic site) lyase	191	138	211	105	115	121
G372_RS0109155	0.0525868	0.137854	0.20721	0.106903	5.25971	0.0236569	0.005035	0.00843506	0.0121075	0.0121075	DNA mismatch repair protein MutS	237	219	257	182	124	166
G372_RS0101095	0.0530109	0.138426	-0.16669	0.0861523	7.01655	0.0127346	0.000930626	0.00456799	0.0102027	0.0102027	GGDEF domain-containing protein	1163	988	1296	1138	958	1180
G372_RS0111630	0.0529731	0.138426	0.281089	0.145255	4.40662	0.0271223	0.0135267	-0.00925306	0.0181218	0.0181218	hypothetical protein	115	92	108	61	50	84
G372_RS0112115	0.0529858	0.138426	-0.174687	0.0902759	6.05373	0.00980573	0.00225166	-0.00143785	0.00997295	0.00997295	flagellar protein FliT	451	379	478	420	350	492
G372_RS0113070	0.0529077	0.138426	0.389268	0.201102	5.73229	0.0939893	0.00359226	0.0570708	0.0105095	0.0570708	50S ribosomal protein L20	369	523	376	202	182	321
G372_RS0100235	0.0531365	0.138619	-0.645323	0.333706	3.98396	0.258564	0.0200511	0.146988	0.0220922	0.146988	hypothetical protein	37	47	45	45	44	146
G372_RS0105365	0.0534851	0.139365	0.191834	0.0993453	5.58132	0.0220865	0.00389851	0.00990944	0.0109057	0.0109057	non-heme iron oxygenase ferredoxin subunit	395	272	319	241	186	225
G372_RS0108910	0.053526	0.139365	0.209652	0.108591	5.24729	0.0160805	0.00551519	-0.00189738	0.012173	0.012173	MarC family protein	251	215	239	143	127	198
G372_RS0101575	0.0537943	0.139928	0.316967	0.16436	4.03764	0.0370311	0.0189976	-0.0103842	0.0215237	0.0215237	hypothetical protein	82	71	68	41	38	51
G372_RS0110930	0.0539743	0.14026	-0.244604	0.126933	4.74547	0.032003	0.00868455	0.00888243	0.0154832	0.0154832	EAL domain-containing protein	115	105	119	99	94	169
G372_RS0107465	0.0543486	0.140824	0.302702	0.157326	8.61364	0.0571903	0.000181981	0.0369452	0.0155766	0.0369452	hypothetical protein	6967	6572	7931	5366	3687	3877
G372_RS0109570	0.0543358	0.140824	-0.275429	0.143143	4.56316	0.0473464	0.011461	0.019274	0.0168483	0.019274	preprotein translocase subunit TatD	98	95	85	82	80	145
G372_RS14070	0.0542578	0.140824	-0.259421	0.13478	5.21182	0.0419887	0.0055356	0.021713	0.0123693	0.021713	hypothetical protein	198	139	208	209.498	178	175.471
G372_RS0111920	0.0544534	0.14096	-0.454465	0.236305	5.42144	0.12897	0.00471935	0.0790407	0.0114088	0.0790407	gfo/Idh/MocA family oxidoreductase	217	210	176	201	177	463
G372_RS0109370	0.0545382	0.141043	-0.459474	0.238993	4.89296	0.131876	0.0080552	0.0776215	0.0144729	0.0776215	hypoxanthine-guanine phosphoribosyltransferase	134	111	109	103	120	274
G372_RS0110020	0.0548276	0.141656	0.165588	0.0862331	6.54194	0.00997042	0.0015028	0.000677923	0.00965142	0.00965142	EAL domain-containing protein	867	714	953	588	475	673
G372_RS0112645	0.0549402	0.14181	0.511446	0.266468	5.55008	0.16368	0.00474037	0.101768	0.0109947	0.101768	sigma-54-dependent Fis family transcriptional regulator	603	201	416	154	153	241
G372_RS0103175	0.0552153	0.142247	0.331397	0.172857	3.9616	0.0430946	0.0224834	-0.00979925	0.0223358	0.0223358	DNA polymerase Y family protein	77	58	72	38	29	56
G372_RS0104835	0.0551683	0.142247	-0.170161	0.0887389	6.19907	0.0113693	0.00201326	0.00134025	0.00979863	0.00979863	DNA mismatch repair endonuclease MutL	595	427	501	469	410	578
G372_RS0106155	0.0557058	0.143373	0.208986	0.109227	5.2294	0.0178373	0.0056253	0.000293041	0.0122704	0.0122704	UbiX family flavin prenyltransferase	233	197	266	148	138	167
G372_RS0109555	0.0558126	0.143511	-0.404139	0.211315	6.57288	0.102583	0.00146691	0.065514	0.00966397	0.065514	TolC family protein	657	533	786	1089	680	655
G372_RS0106935	0.0558762	0.143537	0.228234	0.119369	4.92927	0.0205099	0.00714653	-0.00104327	0.014227	0.014227	CBS domain-containing protein	195	142	184	120	94	119
G372_RS0108205	0.0561863	0.144196	0.183173	0.0959228	6.7629	0.0211071	0.00131486	0.0124869	0.00981603	0.0124869	insulinase family protein	1315	895	999	669	558	952
G372_RS0111405	0.0562996	0.144348	-0.430006	0.225286	3.308	0.116376	0.0352868	0.0408442	0.0315636	0.0408442	Hsp20/alpha crystallin family protein	28	17	29	20	28	48
G372_RS0104645	0.0565468	0.144706	-0.237625	0.12462	5.73377	0.0355757	0.00271156	0.0205835	0.010506	0.0205835	DNA topoisomerase IV subunit A	350	303	268	273	259	430
G372_RS13875	0.0565038	0.144706	0.167356	0.0877527	6.27623	0.0111946	0.0018235	0.00166683	0.0097273	0.0097273	hypothetical protein	753	521	679	450	358	524
G372_RS0104515	0.0567046	0.144972	-0.223899	0.117497	4.99517	0.018536	0.00693522	-0.0025643	0.0137729	0.0137729	glycoside hydrolase family 65 protein	167	117	161	151	117	183
G372_RS13955	0.056803	0.145085	-0.185723	0.0975016	6.02126	0.0217558	0.00227296	0.0119869	0.0100155	0.0119869	hypothetical protein	531.182	354.819	386.743	369.49	362.571	497.887
G372_RS0106065	0.0573183	0.146262	0.19538	0.102784	5.40316	0.0230379	0.00437099	0.0101115	0.0114758	0.0114758	outer membrane lipoprotein LolB	321	264	238	179	154	213
G372_RS0111500	0.0577744	0.147286	-0.512089	0.269889	5.40075	0.166079	0.00491331	0.104347	0.0114849	0.104347	ribonuclease PH	241	177	162	194	174	500
G372_RS0103170	0.0583346	0.148292	0.239259	0.12638	4.77472	0.0220137	0.00868149	-0.00263115	0.0152762	0.0152762	capsular biosynthesis protein CpsI	144	135.57	166.631	87.7278	78.9121	119.71
G372_RS0104720	0.058232	0.148292	-0.174948	0.0923722	5.94813	0.0134715	0.00268298	0.00267887	0.010116	0.010116	GGDEF domain-containing protein	452	349	377	379	331	420
G372_RS13910	0.0582894	0.148292	-0.721181	0.380869	2.3947	0.330104	0.125747	0.0918445	0.0543802	0.0918445	type II toxin-antitoxin system prevent-host-death family antitoxin	9	7	8	8	9	35
G372_RS0110105	0.058436	0.14841	-0.214464	0.113328	6.63597	0.0292103	0.00126873	0.0179962	0.00970082	0.0179962	bifunctional riboflavin kinase/FAD synthetase	891	706	703	658	624	1074
G372_RS0106770	0.058708	0.148819	0.194999	0.103154	5.76829	0.0241761	0.00326165	0.0126993	0.0104287	0.0126993	site-specific tyrosine recombinase XerD	450	288	466	282	223	280
G372_RS0112855	0.0586663	0.148819	-0.335593	0.177498	3.86962	0.0489023	0.0238765	-0.00498223	0.0233819	0.0233819	hypothetical protein	46	35	55	54	36	66
G372_RS0102490	0.0587909	0.148889	0.174185	0.0921736	6.01796	0.0151344	0.00272406	0.0048162	0.0100199	0.0100199	ClpXP protease specificity-enhancing factor	487	456	558	368	278	376
G372_RS0100030	0.0589398	0.149126	0.172607	0.0913919	6.07441	0.0108282	0.00258265	-0.000219842	0.00994607	0.00994607	hypothetical protein	610	443	542	348	295	445
G372_RS0104220	0.0591031	0.149398	-0.168751	0.0894081	7.5268	0.0101424	0.000510998	0.00148816	0.0114797	0.0114797	GGDEF domain-containing protein	1986	1702	2031	1849	1585	2036
G372_RS0107225	0.0592546	0.14964	-1.09594	0.580997	5.70594	0.765392	0.00486768	0.501469	0.0105739	0.501469	50S ribosomal protein L33	268	301	89	286	291	1219
G372_RS0106225	0.0594928	0.150101	0.260631	0.1383	6.04873	0.0433309	0.00216007	0.0265303	0.00997947	0.0265303	RNase adapter RapZ	558	484	573	366	333	304
G372_RS0103150	0.0600383	0.151335	0.177731	0.0945119	5.8255	0.0106583	0.00308396	-0.00160663	0.0103148	0.0103148	ribosome assembly RNA-binding protein YhbY	432	366	442	267	229	351
G372_RS0100460	0.0602612	0.151414	0.23757	0.126443	5.97117	0.0361171	0.0027731	0.0212085	0.0100834	0.0212085	histidinol dehydrogenase	513	398	580	354	289	297
G372_RS0106085	0.0602804	0.151414	-0.259743	0.138254	7.20708	0.043177	0.000728724	0.0279426	0.0106227	0.0279426	50S ribosomal protein L25	1449	1281	1236	1286	981	2077
G372_RS0107095	0.0601364	0.151414	-0.233022	0.123962	7.1079	0.0347296	0.000848029	0.0222017	0.0103907	0.0222017	ArsR family transcriptional regulator	1193	1038	1432	1401	1125	1186
G372_RS0111775	0.0602952	0.151414	-0.546325	0.290811	4.63112	0.191027	0.00852612	0.11833	0.0163244	0.11833	squalene synthase HpnD	83	96	81	93	77	245
G372_RS0112575	0.0606485	0.152159	-0.250476	0.133512	5.70123	0.0402121	0.00344785	0.0232905	0.0105858	0.0232905	sodium-dependent bicarbonate transport family permease	327	235	329	295	323	295
G372_RS0108275	0.0608998	0.152647	0.239267	0.127662	4.76094	0.0209401	0.00907293	-0.00436594	0.0153734	0.0153734	malonyl-acyl-carrier protein] O-methyltransferase BioC	168	129	144	91	84	104
G372_RS0111460	0.0610914	0.152985	0.175186	0.0935407	5.8865	0.0110376	0.00291521	-0.000627081	0.0102096	0.0102096	cyclic pyranopterin monophosphate synthase MoaC	473	381	464	272	265	359
G372_RS0107345	0.0611979	0.153109	-0.160411	0.085687	6.9821	0.0147436	0.000875028	0.00790502	0.0101384	0.0101384	lytic murein transglycosylase B	1219	916	1214	1197	837	1147
G372_RS0102790	0.0615487	0.1537	-0.264543	0.141502	4.78819	0.0450223	0.00891977	0.0211145	0.0151821	0.0211145	DUF971 domain-containing protein	107	130	114	107	107	161
G372_RS0110290	0.0615352	0.1537	-0.729516	0.390192	6.54887	0.342358	0.00150192	0.226873	0.0096538	0.226873	ATP synthase subunit I	634	579	428	579	576	2205
G372_RS0109025	0.0617162	0.153975	-0.348186	0.186362	4.05808	0.078047	0.0145158	0.0375805	0.0213133	0.0375805	glycosyl transferase	57	54	50	51	44	103
G372_RS0109150	0.0624732	0.155719	-0.213852	0.114794	8.08724	0.029533	0.000303774	0.0194627	0.0133505	0.0194627	DUF3365 domain-containing protein	3117	2580	4288	3145	2972	3671
G372_RS0100610	0.0628428	0.156243	0.271421	0.145902	6.46312	0.0476456	0.00161192	0.0303191	0.00964157	0.0303191	50S ribosomal protein L7/L12	813	777	864	602	457	460
G372_RS0102125	0.0628093	0.156243	0.158955	0.0854352	6.8223	0.0141372	0.0010605	0.00713599	0.00988825	0.00988825	tRNA (guanosine(37)-N1)-methyltransferase TrmD	1359	904	1103	700	673	935
G372_RS0112145	0.0628575	0.156243	-0.290503	0.156168	4.54182	0.0545837	0.0104136	0.026169	0.0170165	0.026169	DUF167 domain-containing protein	93	78	100	104	102	86
G372_RS0111575	0.0633219	0.157251	0.202578	0.109093	5.76669	0.026593	0.00351523	0.0143368	0.0104321	0.0143368	homoserine O-succinyltransferase	407	390	383	304	205	278
G372_RS0103710	0.0635295	0.157621	-0.171738	0.0925578	5.9379	0.0144172	0.00271963	0.00424168	0.0101308	0.0101308	AcrB/AcrD/AcrF family protein	466	323	385	390	318	410
G372_RS0108840	0.0637964	0.158137	-0.212832	0.114821	7.68193	0.0294098	0.000436493	0.0193392	0.0119491	0.0193392	HU family DNA-binding protein	1959	2105	2482	1999	2105	2413
G372_RS0107310	0.0638753	0.158187	0.182178	0.0983124	5.57989	0.015349	0.00358825	0.00315231	0.0109097	0.0109097	4-hydroxythreonine-4-phosphate dehydrogenase PdxA	339	266	373	236	168	257
G372_RS0100750	0.0644041	0.15935	-0.323762	0.175066	3.80923	0.0682242	0.0198969	0.0260752	0.0241088	0.0260752	hypothetical protein	42	47	38	53	45	44
G372_RS0109275	0.0645269	0.159507	-0.16724	0.0904724	7.60753	0.0144231	0.000558401	0.00698203	0.0117195	0.0117195	NADP-dependent isocitrate dehydrogenase	2160	1733	2342	2042	1791	2074
G372_RS0105355	0.0646821	0.159743	-0.289106	0.156489	4.51779	0.0544614	0.0097045	0.0270289	0.017208	0.0270289	pyridoxamine 5'-phosphate oxidase family protein	114	77	77	84	71	142
G372_RS13700	0.065134	0.160435	-0.28842	0.156382	4.14057	0.0331841	0.0161864	-0.00590113	0.0204964	0.0204964	energy transducer TonB	66.5855	57	57	57	58	82
G372_RS0105970	0.0651411	0.160435	-0.185634	0.100653	5.53806	0.013515	0.00416668	-0.000195315	0.0110299	0.0110299	HAD family hydrolase	269	244	260	234	216	309
G372_RS0107210	0.0650981	0.160435	0.20199	0.109504	5.21664	0.0249718	0.00564489	0.0102699	0.0123419	0.0123419	hypothetical protein	260	174	257	170	109	179
G372_RS0110810	0.0654757	0.161111	0.182452	0.0990511	5.62293	0.0185079	0.00392496	0.00672664	0.0107917	0.0107917	type II/IV secretion system protein	378	307	330	232	166	301
G372_RS0109405	0.0655393	0.16112	-0.188807	0.102525	5.38093	0.021669	0.00420636	0.00951187	0.0115608	0.0115608	hypothetical protein	215	216	228	225	157	277
G372_RS0105665	0.065632	0.1612	-0.185187	0.100594	5.86767	0.0224313	0.00270937	0.0124694	0.0102405	0.0124694	bifunctional 3,4-dihydroxy-2-butanone-4-phosphate synthase/GTP cyclohydrolase II	387	359	331	383	291	377
G372_RS0101910	0.0660259	0.16143	-0.374731	0.203852	4.07912	0.0919938	0.0189489	0.0433847	0.0211001	0.0433847	Fe(3+) ABC transporter substrate-binding protein	47	67	50	67	44	87
G372_RS0104520	0.0658556	0.16143	-0.286701	0.155866	4.17399	0.0399387	0.0162618	0.00283747	0.0201797	0.0201797	secondary thiamine-phosphate synthase enzyme	69	47	74	62	67	72
G372_RS0104895	0.0658403	0.16143	-0.411391	0.223642	6.4708	0.110792	0.00151772	0.0735057	0.00964119	0.0735057	GGDEF domain-containing protein	413	611	794	672	686	783
G372_RS0110410	0.0659974	0.16143	-0.283924	0.154437	6.43934	0.0528049	0.00178763	0.0339887	0.00964447	0.0339887	argininosuccinate lyase	713	563	550	517	531	988
G372_RS0110850	0.0659853	0.16143	-0.158186	0.08604	6.62244	0.00869147	0.00141256	6.81609e-05	0.00969175	0.00969175	EAL domain-containing protein	806	706	812	697	633	882
G372_RS0108755	0.0666729	0.162864	0.161772	0.0882136	6.29407	0.00923203	0.00195901	-0.00023284	0.00971344	0.00971344	Holliday junction branch migration DNA helicase RuvB	716	549	709	420	396	540
G372_RS0112265	0.0667588	0.162925	-0.396288	0.216162	3.35589	0.049459	0.0393604	-0.0364282	0.0307284	0.0307284	type II toxin-antitoxin system HicB family antitoxin	27	24	26	32	25	37
G372_RS0111880	0.0668961	0.163112	0.157308	0.0858492	6.706	0.0147028	0.00129742	0.0078015	0.00975771	0.00975771	RIP metalloprotease RseP	1030	825	1122	749	584	712
G372_RS0103835	0.0672215	0.163757	0.234147	0.127936	4.7563	0.0282512	0.00914512	0.00560964	0.0154062	0.0154062	DUF3641 domain-containing protein	133	140	164	100	79	100
G372_RS0103330	0.0673375	0.163891	0.179635	0.0981924	5.86912	0.0212507	0.00308249	0.0113801	0.0102381	0.0113801	electron transport complex subunit RsxC	461	393	441	334	251	291
G372_RS0101720	0.0679341	0.165194	-0.482544	0.264343	4.00381	0.153707	0.0197082	0.0851078	0.0218793	0.0851078	hypothetical protein	55	44	44	37	63	103
G372_RS0106195	0.0684464	0.166289	0.166799	0.0915445	5.99498	0.0141435	0.00251991	0.00472622	0.0100507	0.0100507	lipopolysaccharide transport periplasmic protein LptA	543	429	491	368	251	393
G372_RS0104710	0.068998	0.167477	-0.285958	0.157255	6.3582	0.0542066	0.00147143	0.0356223	0.00967283	0.0356223	hypothetical protein	593	408	713	653	579	564
G372_RS0100955	0.0692189	0.167783	0.229122	0.1261	7.82473	0.0348306	0.000394425	0.0234574	0.0124133	0.0234574	50S ribosomal protein L2	3672	2695	3081	2443	1672	1966
G372_RS0108915	0.0692487	0.167783	-0.331165	0.18228	5.70841	0.0727723	0.0034659	0.0463731	0.0105676	0.0463731	cysteine synthase CysM	330	254	273	264	227	541
G372_RS0105710	0.06953	0.16801	0.220984	0.121757	5.29902	0.03244	0.00544347	0.0167937	0.0119121	0.0167937	DUF302 domain-containing protein	266	215	268	190	143	152
G372_RS0108495	0.0694454	0.16801	-0.303466	0.167152	4.00576	0.044087	0.020051	0.000523517	0.0218585	0.0218585	hypothetical protein	61	48	48	50	45	82
G372_RS0108890	0.069495	0.16801	0.278376	0.153359	4.24271	0.0469401	0.0157275	0.0138877	0.019551	0.019551	hypothetical protein	91	82	93	68	36	64
G372_RS0108660	0.0698058	0.168525	-0.810281	0.446887	3.98247	0.436615	0.0202011	0.27936	0.0221082	0.27936	tRNA-Gln	56	49	22	53	43	162
G372_RS0104400	0.0700448	0.16895	0.212607	0.117358	5.01479	0.0292388	0.0070216	0.0125762	0.0136376	0.0136376	flagellar biosynthesis protein FlhB	167	176	219	125	112	127
G372_RS0108415	0.0707799	0.17057	0.156525	0.0866268	6.45337	0.010537	0.00161387	0.00236986	0.00964244	0.00964244	phosphoribosyl-ATP diphosphatase	855	653	799	565	448	577
G372_RS0113100	0.0715432	0.172255	-0.269893	0.149773	5.12608	0.048771	0.00611767	0.0275303	0.0128919	0.0275303	flagellar brake protein	186	141	166	146	127	277
G372_RS0111385	0.071705	0.17249	-0.32201	0.178796	3.96364	0.0694689	0.019552	0.0284002	0.0223133	0.0284002	hypothetical protein	57	31	68	51	52	63
G372_RS0111045	0.0724357	0.174092	-0.622769	0.346682	5.1576	0.260578	0.00660139	0.173681	0.0126929	0.173681	hypothetical protein	79	152	234	181	213	249
G372_RS0106925	0.073817	0.177253	-0.324598	0.181568	6.02713	0.0711695	0.00256702	0.0468835	0.0100078	0.0468835	hypothetical protein	433	303	459	504	446	372
G372_RS0111475	0.0740297	0.177605	0.176781	0.0989575	5.56567	0.00975749	0.00373896	-0.00326137	0.0109499	0.0109499	serine endoprotease DegQ	335	275	347	216	178	256
G372_RS0107960	0.0741563	0.17775	-0.30818	0.172587	3.79595	0.040688	0.0204065	-0.00516211	0.024273	0.024273	hypothetical protein	39	44	43	48	38	54
G372_RS0106955	0.0752874	0.180301	-0.155801	0.087592	6.30359	0.0146226	0.00180205	0.00737354	0.00970648	0.00970648	single-stranded DNA-binding protein	668	454	587	496.999	418.945	715
G372_RS0108570	0.0754489	0.180526	-0.202853	0.114108	5.94289	0.0279697	0.00268314	0.0168479	0.0101235	0.0168479	peptidase S15	433	292	444	316	326	525
G372_RS0102270	0.0758112	0.181071	0.46499	0.261889	7.80722	0.147167	0.000485105	0.102393	0.0123547	0.102393	iron-sulfur cluster insertion protein ErpA	3432	3280	3661	2757	1416	1370
G372_RS0105125	0.0758014	0.181071	-0.193205	0.108812	6.21605	0.0254066	0.00190122	0.0158589	0.00978144	0.0158589	exodeoxyribonuclease V subunit beta	569	379	600	498	473	514
G372_RS0111805	0.0759482	0.181237	-0.415319	0.234023	5.25528	0.117467	0.00552318	0.0766267	0.0121306	0.0766267	N-ethylammeline chlorohydrolase	198	157	166	184	130	394
G372_RS0102340	0.0763168	0.181955	-0.159713	0.0901079	7.25664	0.0173958	0.000746405	0.0114327	0.0107461	0.0114327	type II secretion system F family protein	1600	1157	1671	1420	1295	1423
G372_RS0111075	0.0765587	0.18237	0.187965	0.106134	5.29608	0.0174272	0.00497075	0.00356414	0.011926	0.011926	MFS transporter	245	198	298	168	130	197
G372_RS13970	0.0767404	0.182641	-0.525154	0.29671	3.33058	0.188381	0.0429915	0.0890641	0.0311662	0.0890641	hypothetical protein	24	28	19	24	22	63
G372_RS0102585	0.0771708	0.18334	-0.152479	0.0862759	6.99879	0.0154565	0.000996211	0.00960572	0.0101691	0.0101691	glycine dehydrogenase (aminomethyl-transferring)	1360	843	1258	1113	863	1243
G372_RS0106895	0.07712	0.18334	0.15225	0.0861316	6.60659	0.0100414	0.00144604	0.00241318	0.00968194	0.00968194	glutamate-5-semialdehyde dehydrogenase	975	787	915	663	518	678
G372_RS0101775	0.0775145	0.18367	-0.151309	0.0857132	6.60454	0.0150426	0.00133939	0.00887848	0.00968073	0.00968073	agmatine deiminase family protein	762	627	926	754	623	777
G372_RS0107805	0.0774522	0.18367	-0.318285	0.180264	6.36792	0.0693856	0.00154787	0.0471946	0.00966801	0.0471946	Na(+)/H(+) antiporter subunit A	632	582	460	585	425	927
G372_RS0109165	0.0774105	0.18367	-0.161773	0.0916089	5.99603	0.0122514	0.00253905	0.00296117	0.0100492	0.0100492	protein-L-isoaspartate(D-aspartate) O-methyltransferase	445	383	411	408	344	425
G372_RS13630	0.0777454	0.184054	0.305986	0.173469	11.3404	0.0641982	1.02048e-05	0.0451272	0.0356111	0.0451272	RNase P RNA component class A rnpB	94703	84435	162973	61451	54909	80786
G372_RS0107965	0.0783075	0.185222	-0.313155	0.177869	3.79736	0.0596317	0.0232006	0.0145643	0.0242555	0.0242555	DUF861 domain-containing protein	57	30	43	38	46	57
G372_RS0100385	0.0789518	0.186582	-0.829929	0.47241	1.77908	0.350132	0.254422	-0.075051	0.0803339	0.0803339	tRNA-Met	3	3	6	4	9	12
G372_RS0112120	0.0790461	0.18664	-0.505015	0.287554	3.49933	0.175737	0.0300664	0.0939642	0.0283928	0.0939642	hypothetical protein	35	37	17	40	30	45
G372_RS0100390	0.0791926	0.186658	-0.149792	0.0853325	6.74693	0.0120093	0.00112386	0.00547364	0.00979858	0.00979858	ferric iron uptake transcriptional regulator	906	795	944	900	705	880
G372_RS0106900	0.0791605	0.186658	0.195145	0.111157	5.24605	0.0262515	0.00533453	0.0131993	0.0121796	0.0131993	DNA polymerase III subunit delta	266	167	283	161	137	166
G372_RS0100950	0.0793604	0.186726	0.315578	0.179877	6.76441	0.0687038	0.00119706	0.0473366	0.00981773	0.0473366	30S ribosomal protein S19	1231	1045	1120	833	624	563
G372_RS0110785	0.0793312	0.186726	-0.331427	0.188892	4.87845	0.0757694	0.00826617	0.0452543	0.0145695	0.0452543	adenosine deaminase	157	108	111	114	102	230
G372_RS0112970	0.0795845	0.18709	0.230204	0.131313	6.51874	0.0365898	0.00145535	0.0244091	0.00964528	0.0244091	hypothetical protein	1055	635	905	646	447	551
G372_RS0101750	0.0800322	0.187814	-0.225279	0.128694	5.46541	0.0350997	0.00423588	0.0206073	0.0112568	0.0206073	DNA internalization-related competence protein ComEC/Rec2	277	214	218	203	187	351
G372_RS0106815	0.0799689	0.187814	0.184552	0.105406	5.33929	0.0148357	0.00493427	0.000838131	0.0117313	0.0117313	LPS export ABC transporter permease LptG	291	201	280	177	148	188
G372_RS0105245	0.0804127	0.188377	0.242629	0.13878	4.50499	0.0324297	0.0115793	0.00688201	0.0173108	0.0173108	hypothetical protein	115	106	119	87	56	75
G372_RS0107060	0.0803478	0.188377	0.158977	0.0909133	6.10368	0.00931912	0.00248932	-0.000318108	0.00990852	0.00990852	BCCT family transporter	610	453	567	354	306	470
G372_RS0110755	0.0805656	0.188571	-0.202424	0.115842	6.76292	0.028396	0.00112968	0.0189995	0.00981606	0.0189995	HDOD domain-containing protein	987	623	1072	932	733	928
G372_RS0108780	0.0810832	0.189453	0.155844	0.0893375	7.50614	0.00905554	0.0005519	0.00165982	0.0114199	0.0114199	Tol-Pal system beta propeller repeat protein TolB	2331	2004	2248	1541	1310	1707
G372_RS0111185	0.0810354	0.189453	-0.225442	0.129214	4.99982	0.0352828	0.00652391	0.0185206	0.0137408	0.0185206	ABC transporter ATP-binding protein	179	127	140	124	121	219
G372_RS0102845	0.0813779	0.189976	-0.223189	0.128067	4.76864	0.02636	0.00928287	0.00498721	0.015319	0.015319	hydrogenase expression/formation protein HypE	124	93	138	126	108	120
G372_RS0108475	0.0815649	0.190247	0.188032	0.10796	5.27102	0.0140442	0.00543385	-0.0011372	0.0120493	0.0120493	tyrosine recombinase XerC	238	211	267	169	129	183
G372_RS0102275	0.0819305	0.190934	0.180902	0.103991	5.915	0.0227946	0.00280095	0.0134202	0.010165	0.0134202	polymer-forming cytoskeletal protein	513	367	488	357	255	307
G372_RS0105280	0.0821217	0.191214	0.188108	0.108201	6.77408	0.0246643	0.0011444	0.0164168	0.00982875	0.0164168	phosphate acyltransferase PlsX	1189	1017	1013	649	550	1022
G372_RS0109285	0.0827224	0.192446	0.173229	0.0998377	8.4327	0.016954	0.000194116	0.00974524	0.0147572	0.0147572	ATP-dependent Clp protease ATP-binding subunit ClpA	6246	4425	6287	4156	3260	3995
G372_RS0102795	0.0832712	0.193153	0.234479	0.135379	4.53523	0.0229836	0.0104226	-0.00231074	0.0170688	0.0170688	EamA/RhaT family transporter	138	94	121	77	56	94
G372_RS0106870	0.0832583	0.193153	-0.234847	0.135586	5.853	0.0386064	0.003036	0.0245395	0.0102656	0.0245395	sigma-54-dependent Fis family transcriptional regulator	361	270	419	393	331	333
G372_RS0107065	0.0832455	0.193153	0.181153	0.104582	5.39545	0.0177916	0.00490128	0.00503203	0.0115049	0.0115049	hypothetical protein	292	242	273	198	160	185
G372_RS0110240	0.083314	0.193153	0.152467	0.0880408	6.34298	0.0138338	0.00194567	0.00662932	0.0096811	0.0096811	glutamine--fructose-6-phosphate transaminase (isomerizing)	650	627	781	498	405	523
G372_RS0108140	0.0840287	0.194475	-0.704038	0.407482	6.31956	0.347951	0.00218576	0.246877	0.00969552	0.246877	hypothetical protein	557	520	283	519	424	1616
G372_RS0108700	0.0839585	0.194475	0.187221	0.108335	5.27757	0.011657	0.00558829	-0.00416137	0.0120164	0.0120164	NAD(P)/FAD-dependent oxidoreductase	271	210	240	158	135	191
G372_RS0111735	0.0842678	0.194844	0.217869	0.126195	4.77438	0.0161483	0.00860916	-0.00622375	0.0152786	0.0152786	ADP compounds hydrolase NudE	153	131	157	95	75	120
G372_RS0112485	0.0843333	0.194844	0.171879	0.0995775	5.67277	0.0167142	0.00421368	0.00560078	0.0106598	0.0106598	DUF4172 domain-containing protein	375.71	325.849	357.608	223.401	184.698	331.564
G372_RS0103145	0.0847172	0.195262	0.17285	0.100264	5.48732	0.00941576	0.00389381	-0.00332805	0.0111855	0.0111855	23S rRNA (uridine(2552)-2'-O)-methyltransferase RlmE	320	246	319	199	168	234
G372_RS0106940	0.084685	0.195262	0.339088	0.196673	4.2703	0.0809104	0.0140295	0.0439906	0.0193039	0.0439906	rRNA maturation RNase YbeY	129	61	105	47	58	57
G372_RS0109260	0.0848048	0.195262	-0.358332	0.207914	5.0946	0.0903942	0.0065823	0.0582598	0.0130971	0.0582598	lysogenization regulator HflD	157	178	124	160	124	269
G372_RS0111250	0.0847857	0.195262	-0.276446	0.160392	4.20559	0.0454344	0.0187006	0.00943399	0.0198877	0.0198877	sugar transferase	87	46	67	60	60	90
G372_RS0107445	0.0855777	0.196873	-0.156533	0.0910497	7.68436	0.0172872	0.000478385	0.0119422	0.0119567	0.0119567	sulfurtransferase TusA family protein	2125	2161	2443	1954	1692	2843
G372_RS0102610	0.0857569	0.196948	-0.270508	0.157435	4.1196	0.0382738	0.0164795	0.00392225	0.0206992	0.0206992	heme A synthase	79	44	60	57	55	79
G372_RS0107190	0.0857028	0.196948	-0.584178	0.339932	5.67822	0.241044	0.00406613	0.169265	0.0106456	0.169265	guanylate kinase	327	240	182	271	213	750
G372_RS0110425	0.0864957	0.198475	0.201956	0.117815	4.97201	0.0180459	0.00688763	0.000374849	0.013933	0.013933	universal stress protein	178	149	210	110	95	152
G372_RS0103445	0.0868874	0.199203	0.146839	0.0857677	6.78531	0.0123664	0.00119222	0.00618023	0.00984193	0.00984193	dihydroorotate dehydrogenase electron transfer subunit	1215	806	1216	703	638	895
G372_RS13645	0.0870714	0.199455	0.329247	0.192424	3.64929	0.0722612	0.0293422	0.0203328	0.0261982	0.0261982	hypothetical protein	48	54	48	28	19	45
G372_RS0112660	0.0872348	0.199659	0.257379	0.150499	4.49814	0.0470533	0.010657	0.0233181	0.0173661	0.0233181	type 1 glutamine amidotransferase domain-containing protein	147	81	122	58	71	85
G372_RS0105835	0.0878737	0.200855	-0.213621	0.125164	5.64415	0.0324895	0.00397891	0.0195203	0.0107351	0.0195203	glutamate--tRNA ligase	306	284	259	232	261	370
G372_RS0107795	0.0879813	0.200855	-0.161633	0.094736	5.82771	0.0125564	0.00315164	0.00274691	0.0103107	0.0103107	hypothetical protein	412	299	343	328	298	368
G372_RS0113390	0.0879068	0.200855	-0.652118	0.382128	7.32089	0.302804	0.000753203	0.218279	0.0109111	0.218279	DUF2892 domain-containing protein	1330	830	1623	3738	1283	1385
G372_RS0110165	0.0881339	0.201032	0.190723	0.11184	5.16165	0.0176863	0.00609441	0.00237268	0.0126678	0.0126678	NADP(H)-dependent aldo-keto reductase	216	178	252	156	116	158
G372_RS0111915	0.0882966	0.201232	-0.16345	0.0958957	5.96615	0.0190499	0.00281445	0.0109795	0.0100904	0.0109795	DegT/DnrJ/EryC1/StrS family aminotransferase	414	406	380	408	326	411
G372_RS0100335	0.0888405	0.2023	0.17618	0.103541	5.43265	0.0122178	0.00471233	-0.00107977	0.0113688	0.0113688	cardiolipin synthase	310	225	307	176	157	239
G372_RS0112125	0.0894834	0.203592	-0.161271	0.0949699	5.76697	0.0105667	0.00309744	0.000357742	0.0104315	0.0104315	bifunctional (p)ppGpp synthetase/guanosine-3',5'-bis(diphosphate) 3'-pyrophosphohydrolase relA	336	312	336	302	271	366
G372_RS0108470	0.0897166	0.203796	0.155714	0.0917639	7.74855	0.0137959	0.000469183	0.0076831	0.0121617	0.0121617	DUF484 domain-containing protein	2921	2296	3240	2134	1582	2113
G372_RS0109480	0.089725	0.203796	-0.344392	0.20296	3.47973	0.0685007	0.0330912	0.00805737	0.0286978	0.0286978	heat shock protein HspQ	27	34	29	41	27	36
G372_RS0106560	0.0907599	0.205973	-0.2519	0.14893	4.30178	0.0311248	0.0142451	0.00086573	0.019025	0.019025	NERD domain-containing protein	74	68	74	62	66	102
G372_RS0108990	0.0910072	0.20636	-0.164302	0.0972137	5.6507	0.0138833	0.003458	0.00377292	0.0107178	0.0107178	bifunctional methylenetetrahydrofolate dehydrogenase/methenyltetrahydrofolate cyclohydrolase FolD	310	275	290	248	237	361
G372_RS0111325	0.0915241	0.207357	-0.207985	0.123257	4.79666	0.0162143	0.00766518	-0.0036191	0.0151233	0.0151233	PEP-CTERM system TPR-repeat protein PrsT	141	103	122	111	105	149
G372_RS0110220	0.0920652	0.208407	0.436693	0.259226	3.03845	0.137848	0.0536159	0.0471813	0.0368403	0.0471813	hypothetical protein	38	20	30	9	15	23
G372_RS0108810	0.0929007	0.210121	0.277593	0.165205	4.00762	0.043636	0.0191003	0.00654801	0.0218388	0.0218388	tRNA-Lys	82	67	62	47	39	42
G372_RS0101160	0.0930345	0.210247	-0.521227	0.310327	2.49691	0.120005	0.0934137	-0.0452867	0.0510408	0.0510408	hypothetical protein	12	8	10	19	9	15
G372_RS0101940	0.0932723	0.210607	-0.203548	0.121276	9.73138	0.024084	5.49148e-05	0.0145132	0.0220069	0.0220069	OmpA family protein	16705	13765	21135	18077	14445	17954
G372_RS0102485	0.0935075	0.210961	0.162992	0.0971822	5.7191	0.0139736	0.00362544	0.00387922	0.0105411	0.0105411	FAD-binding protein	382	335	388	257	234	265
G372_RS0104020	0.0941257	0.211917	-0.180084	0.107575	5.22802	0.017228	0.0050807	0.00429291	0.012278	0.012278	alanine dehydrogenase	225	175	172	182	153	219
G372_RS0104050	0.0941678	0.211917	-0.147415	0.0880716	6.27589	0.0129808	0.00190733	0.00616949	0.00972758	0.00972758	GNAT family N-acetyltransferase	580	434	659	544	409	608
G372_RS0105775	0.0941507	0.211917	0.252752	0.150996	6.09981	0.0465248	0.00213517	0.0320645	0.00991341	0.0320645	YbhB/YbcL family Raf kinase inhibitor-like protein	608	437	671	378	358	323
G372_RS0100665	0.0945477	0.212594	-0.154802	0.0925915	5.96406	0.010715	0.00276649	0.00164088	0.0100933	0.0100933	TIGR00730 family Rossman fold protein	435	365	405	398	291	463
G372_RS0110955	0.0948969	0.213201	-0.207508	0.124248	4.83593	0.0172802	0.00830218	-0.00284932	0.0148541	0.0148541	NAD(P)H dehydrogenase	133	122	123	129	103	147
G372_RS0102760	0.0958799	0.215049	0.160909	0.0966324	5.7432	0.0138906	0.00352256	0.00413129	0.0104842	0.0104842	DNA helicase II	421	316	400	238	204	354
G372_RS0104285	0.0958449	0.215049	-0.157465	0.0945545	5.84886	0.0096615	0.00313804	-0.000359423	0.0102728	0.0102728	hypothetical protein	368	324	380	311	293	418
G372_RS0101825	0.0961213	0.215411	-0.204914	0.123149	4.88415	0.0152036	0.00821663	-0.00495829	0.0145317	0.0145317	type III secretion protein	147	111	142	140	103	156
G372_RS0104965	0.0963528	0.215571	-0.275987	0.165977	3.93751	0.0292009	0.0187199	-0.0107822	0.0226029	0.0226029	hypothetical protein	55	38	57	50	48	60
G372_RS0108880	0.0963533	0.215571	0.270027	0.162393	4.03274	0.0535203	0.0176505	0.0219069	0.0215747	0.0219069	hypothetical protein	85	57	75	35	50	48
G372_RS0105515	0.0968011	0.216393	-0.181657	0.109395	6.31949	0.0242603	0.0019037	0.0160471	0.00969556	0.0160471	nucleoid-associated protein, YbaB/EbfC family	603	482	618	616	501	526
G372_RS13880	0.0974405	0.217641	-0.699389	0.421982	1.99548	0.311776	0.197162	0.00912904	0.0699407	0.0699407	signal recognition particle sRNA small type ffs	4	7	5	7	5	20
G372_RS0107520	0.0977055	0.218052	-0.926633	0.559534	7.01474	0.633288	0.00111427	0.468502	0.0101992	0.468502	hypothetical protein	1045	600	755	526	2143	3549
G372_RS0101570	0.0986644	0.220009	0.228069	0.138109	4.76482	0.0384936	0.00926171	0.0193496	0.0153459	0.0193496	hypothetical protein	187	100	166	91	89	101
G372_RS0106150	0.098986	0.220361	0.148993	0.0903104	6.0799	0.0128228	0.00229501	0.00540887	0.00993895	0.00993895	UDP-N-acetylmuramate:L-alanyl-gamma-D-glutamyl-meso-diaminopimelate ligase	512	489	574	360	335	399
G372_RS0110145	0.0989742	0.220361	-0.39815	0.241326	5.60485	0.117443	0.00372194	0.0836352	0.0108407	0.0836352	SLC13 family permease	310	260	188	254	206	502
G372_RS0111690	0.0996977	0.221761	0.149985	0.0911032	6.01548	0.0151429	0.0024265	0.00806624	0.0100232	0.0100232	kinase/pyrophosphorylase	520	377	605	356	283	393
G372_RS0105555	0.100483	0.223323	-0.528176	0.321565	3.88212	0.207776	0.0217883	0.133318	0.0232355	0.133318	hypothetical protein	52	33	40	81	61	36
G372_RS0108855	0.100661	0.223534	-0.153028	0.0932157	5.851	0.0156187	0.00276472	0.00797701	0.010269	0.010269	motility protein MotB	374	361	340	328	270	430
G372_RS0110025	0.101171	0.224481	-0.239925	0.146367	4.32417	0.0327386	0.013306	0.00603065	0.0188289	0.0188289	peptide-methionine (R)-S-oxide reductase	70	61	95	85	60	86
G372_RS0112170	0.10134	0.224671	0.202272	0.123457	5.61715	0.0305643	0.00414981	0.0187128	0.0108073	0.0187128	radical SAM protein	457	251	338	231	197	243
G372_RS0100960	0.101803	0.225369	0.222182	0.135794	6.64402	0.0369374	0.00138277	0.0262771	0.00970651	0.0262771	50S ribosomal protein L23	1212	856	841	719	450	725
G372_RS0108995	0.101823	0.225369	-0.226062	0.138173	6.24236	0.0382415	0.00191934	0.0267184	0.00975642	0.0267184	GGDEF domain-containing protein	549	432	562	572	512	470
G372_RS0103815	0.102539	0.226582	-0.232326	0.142298	5.50704	0.0404911	0.00406735	0.0263059	0.0111236	0.0263059	hypothetical protein	202	227	316	256	216	276
G372_RS0111750	0.102485	0.226582	-0.157717	0.0965852	5.99251	0.0186568	0.00261229	0.0113808	0.010054	0.0113808	glutamate synthase	435	366	438	401	378	387
G372_RS0101260	0.103062	0.227549	0.18465	0.113269	5.12855	0.0192176	0.0063689	0.0048672	0.012876	0.012876	TraY domain-containing protein	213	201	203	154	106	160
G372_RS0105940	0.103148	0.227553	-0.392791	0.241009	4.61342	0.115988	0.0108378	0.07629	0.0164591	0.07629	hypothetical protein	105	93	79	86	76	202
G372_RS0100075	0.103386	0.227889	0.309254	0.189883	5.40178	0.0719581	0.00501878	0.0490645	0.011481	0.0490645	hypothetical protein	450	211	251	157	142	221
G372_RS0107370	0.103575	0.22812	0.20694	0.127132	4.71048	0.0215079	0.0085085	0.00231727	0.0157352	0.0157352	lipoyl(octanoyl) transferase LipB	149	136	126	91	78	101
G372_RS0107295	0.104106	0.229101	-0.147071	0.0904903	6.06651	0.0100148	0.00232641	0.00208094	0.00995633	0.00995633	Co2+/Mg2+ efflux protein ApaG	469	412	458	438	361	456
G372_RS0105060	0.105606	0.232213	-0.238009	0.147077	4.28851	0.0292284	0.0133054	0.00198692	0.0191421	0.0191421	GFA family protein	68	68	79	84	55	85
G372_RS0104675	0.105789	0.232234	0.22373	0.138326	4.50164	0.0206638	0.0113632	-0.00430417	0.0173378	0.0173378	permease	122	104	110	72	55	94
G372_RS0106780	0.105753	0.232234	0.138174	0.0854201	6.92957	0.00937477	0.000897578	0.00366139	0.0100473	0.0100473	serine protease	1386	951	1375	847	733	1010
G372_RS0101710	0.10619	0.232923	-0.269288	0.166684	4.14126	0.055095	0.0141803	0.027495	0.0204898	0.027495	hypothetical protein	68	40	82	59	63	71
G372_RS0105535	0.10653	0.23348	0.211718	0.131177	4.68418	0.0340961	0.00900865	0.0168024	0.0159277	0.0168024	cell envelope biogenesis protein OmpA	137	123	141	111	63	94
G372_RS0111110	0.106777	0.233831	0.27286	0.169179	4.29316	0.0566815	0.0140639	0.0288682	0.0191011	0.0288682	hypothetical protein	86	77	121	71	48	54
G372_RS0113355	0.107228	0.234627	-0.158538	0.0984231	5.61611	0.0133702	0.00372055	0.00356687	0.0108101	0.0108101	hypothetical protein	311	221	327	259	244	300
G372_RS0112740	0.10773	0.235533	0.22117	0.137502	6.39321	0.0373631	0.00169901	0.0266613	0.00965723	0.0266613	hypothetical protein	684	609	985	484	459	498
G372_RS0111040	0.108014	0.235963	-0.403188	0.250866	4.93284	0.124289	0.00717276	0.0872281	0.0142026	0.0872281	hypothetical protein	84	133	178	133	145	182
G372_RS0113060	0.108198	0.236172	-0.213141	0.132687	7.42411	0.0347558	0.000608611	0.0258002	0.0111885	0.0258002	translation initiation factor IF-3	1693	1707	1633	1575	1211	2457
G372_RS0103205	0.108286	0.236173	0.207812	0.129402	4.75031	0.0203406	0.00966859	-0.000437603	0.0154488	0.0154488	methyltransferase domain-containing protein	157	108	170	92	75	117
G372_RS0105995	0.109048	0.237641	-0.244499	0.152575	4.21249	0.0283452	0.0150939	-0.00207976	0.0198247	0.0198247	rod shape-determining protein MreD	66	65	67	74	60	71
G372_RS0102800	0.109169	0.237713	-0.258676	0.161477	4.07017	0.0429892	0.0179217	0.0107223	0.0211904	0.0211904	hypothetical protein	48	56	68	52	51	79
G372_RS0103120	0.109819	0.238741	-0.371313	0.232215	6.48727	0.106071	0.00150431	0.0793814	0.00964132	0.0793814	preprotein translocase subunit SecG	707	686	461	570	551	1137
G372_RS0103895	0.10978	0.238741	0.177719	0.111131	5.85107	0.0242953	0.00332579	0.0151993	0.0102689	0.0151993	MexH family multidrug efflux RND transporter periplasmic adaptor subunit	466	349	464	242	228	420
G372_RS0111135	0.110122	0.239206	-0.157971	0.0988777	5.59046	0.0157967	0.00378491	0.00660289	0.0108803	0.0108803	hypothetical protein	317.22	251.307	261.225	228.531	227.187	337.776
G372_RS0106185	0.110438	0.239698	0.189892	0.118963	4.92559	0.016197	0.00697602	-0.000251835	0.0142521	0.0142521	3-deoxy-manno-octulosonate-8-phosphatase KdsC	203	142	165	116	97	125
G372_RS0102535	0.110815	0.240128	-0.523525	0.328323	7.46886	0.211579	0.00063392	0.16106	0.0113135	0.16106	copper oxidase	1378.17	1272.39	1932.04	3093.09	2074.72	1330.52
G372_RS0107230	0.110728	0.240128	-0.914929	0.573649	5.52972	0.646016	0.00576313	0.487846	0.0110547	0.487846	50S ribosomal protein L28	252	256	86	230	202	980
G372_RS0112585	0.110957	0.240244	-0.210983	0.132368	4.8436	0.0343798	0.00840003	0.0178821	0.0148022	0.0178821	RNA 2',3'-cyclic phosphodiesterase	127	93	172	130	112	138
G372_RS0112715	0.11142	0.241051	0.271596	0.170617	7.08888	0.0570617	0.000798599	0.0428668	0.0103495	0.0428668	BMC domain-containing protein	1267.28	1556.64	1810.43	917.878	959.752	939.871
G372_RS0100755	0.111633	0.241289	0.242921	0.152694	4.24618	0.0441067	0.0154535	0.017551	0.0195198	0.0195198	hypothetical protein	118	64	88	62	49	55
G372_RS0101650	0.11171	0.241289	0.164079	0.103159	5.44888	0.0208467	0.00452471	0.0114378	0.0113125	0.0114378	ATP-dependent RNA helicase HrpA	318	203	342	178	174	228
G372_RS0105420	0.111931	0.241572	0.179357	0.112833	5.07153	0.0155288	0.0058462	0.00150135	0.0132509	0.0132509	hypothetical protein	193	192	196	132	105	160
G372_RS0109210	0.11206	0.241657	0.161122	0.101398	7.12712	0.020126	0.000750842	0.0146715	0.0104335	0.0146715	GTP cyclohydrolase II RibA	1700	1158	1724	1161	889	1062
G372_RS0103890	0.1125	0.242412	0.141759	0.0893221	6.19752	0.00781747	0.00216742	6.85569e-05	0.00980024	0.00980024	AcrB/AcrD/AcrF family protein	651	499	623	434	327	488
G372_RS0107000	0.113429	0.244219	-0.289432	0.182842	5.42775	0.0652486	0.00419091	0.0459557	0.0113861	0.0459557	aspartate 1-decarboxylase	270	199	195	181	192	377
G372_RS0101435	0.113621	0.244436	0.145417	0.0919127	6.48645	0.0164814	0.0014205	0.0112514	0.00964129	0.0112514	signal peptidase I	790	731	839	602	490	556
G372_RS0100325	0.114149	0.245333	-0.444008	0.281051	6.17719	0.15393	0.00208275	0.116401	0.00982191	0.116401	preprotein translocase subunit YajC	439	493	365	435	347	1040
G372_RS0113105	0.114221	0.245333	-0.23602	0.149427	5.7227	0.0435058	0.00356942	0.0299232	0.0105324	0.0299232	flagellar protein FlgN	282	262	373	321	313	292
G372_RS0102660	0.114365	0.245445	0.160947	0.101938	5.4992	0.0103155	0.004439	-0.00125859	0.011148	0.011148	zinc ABC transporter permease	329	259	300	186	172	258
G372_RS0107030	0.115004	0.246504	0.233188	0.147953	5.45934	0.0425811	0.00483553	0.0279997	0.011277	0.0279997	23S rRNA pseudouridine(1911/1915/1917) synthase RluD	343	255	289	188	123	284
G372_RS0112470	0.115041	0.246504	0.203558	0.129167	4.67044	0.0227944	0.00899667	0.00395789	0.0160294	0.0160294	hypothetical protein	150	108	139	75	86	99
G372_RS0107775	0.11517	0.246583	-0.247743	0.157259	7.13436	0.0480896	0.000827645	0.0362682	0.0104498	0.0362682	alpha-D-glucose phosphate-specific phosphoglucomutase	1344	939	1488	1543	1147	1169
G372_RS0104205	0.115689	0.247173	-0.307427	0.195424	7.08925	0.074182	0.000740216	0.0565456	0.0103503	0.0565456	methyl-accepting chemotaxis protein	912	1020	1612	1355	1181	1235
G372_RS0107640	0.115558	0.247173	-0.332586	0.211341	3.38305	0.06931	0.0367303	0.00842713	0.0302673	0.0302673	uroporphyrinogen-III C-methyltransferase	40	21	24	34	22	39
G372_RS0112370	0.115721	0.247173	-0.158492	0.100759	5.53616	0.0119839	0.00419293	0.001367	0.0110356	0.0110356	leucyl aminopeptidase family protein	267	247	268	224	214	311
G372_RS0104955	0.115883	0.247321	0.228421	0.145279	4.4728	0.0303407	0.0140867	0.00427307	0.0175723	0.0175723	hypothetical protein	96	110	122	70	55	88
G372_RS0103310	0.116414	0.24815	0.207543	0.132193	4.67951	0.0161372	0.0102501	-0.00623138	0.0159622	0.0159622	putative motility protein	146	119	134	91	67	107
G372_RS0103585	0.116641	0.24815	-0.181929	0.11595	5.02221	0.0254867	0.00658009	0.0128665	0.0135866	0.0135866	phosphoribosylaminoimidazolesuccinocarboxamide synthase	162	136	165	161	144	142
G372_RS0105605	0.116547	0.24815	0.362587	0.23103	4.25543	0.103491	0.0160521	0.0640105	0.0194367	0.0640105	hypothetical protein	103	75	106	35	66	62
G372_RS14075	0.116612	0.24815	-0.259954	0.165665	4.05277	0.045144	0.0197996	0.0112892	0.0213677	0.0213677	phosphoglycolate phosphatase	66	57	46	51	55	71
G372_RS0108260	0.117274	0.249301	0.194305	0.124052	6.44227	0.0297929	0.00151985	0.0215634	0.00964397	0.0215634	CcoQ/FixQ family Cbb3-type cytochrome c oxidase assembly chaperone	673	728	932	573	413	564
G372_RS0102905	0.117505	0.249593	1.14809	0.733448	7.47627	1.04097	0.00122524	0.805694	0.0113345	0.805694	adenylyl-sulfate reductase subunit beta	3941	3012	3584	279	611	4166
G372_RS0106915	0.117846	0.250121	0.228654	0.14621	4.57948	0.0413377	0.0110059	0.0210601	0.0167209	0.0210601	DUF2189 domain-containing protein	149	79	151	73	66	97
G372_RS0106110	0.118322	0.250897	-0.143354	0.0917844	7.76659	0.0129806	0.00041603	0.0081034	0.0122205	0.0122205	pyruvate dehydrogenase (acetyl-transferring), homodimeric type	2580.36	2357	2408	2336	2060	2451
G372_RS0109475	0.118399	0.250897	-0.234139	0.149942	5.21103	0.0434253	0.00557079	0.028153	0.0123739	0.028153	NUDIX domain-containing protein	196	177	171	150	147	285
G372_RS0108420	0.119086	0.252154	0.134451	0.0862625	6.93966	0.00989499	0.00109769	0.00449218	0.0100641	0.0100641	imidazole glycerol phosphate synthase subunit HisF	1418	964	1359	907	729	983
G372_RS13650	0.119388	0.252396	0.192435	0.123566	4.76532	0.0257354	0.00756043	0.010722	0.0153424	0.0153424	type II toxin-antitoxin system HicA family toxin	143	128	161	90	98	98
G372_RS0107150	0.119338	0.252396	-0.169405	0.108763	5.24718	0.0130234	0.00557062	-5.3214e-05	0.0121736	0.0121736	ATP-dependent DNA helicase RecG	202	159	227	185	166	207
G372_RS0113090	0.119953	0.253392	0.173734	0.111728	6.8241	0.024035	0.00122278	0.0175021	0.00989062	0.0175021	MerR family transcriptional regulator	1099	991	1279	913	596	796
G372_RS0101870	0.12016	0.253629	-0.144635	0.0930663	7.87484	0.0134393	0.000408276	0.0085461	0.0125837	0.0125837	chemotaxis protein CheA	2805	2509	2874	2851	2129	2694
G372_RS0102620	0.120713	0.254597	-0.336828	0.217058	3.29127	0.0665414	0.0388092	0.00182253	0.0318623	0.0318623	hypothetical protein	24	18	35	30	20	37
G372_RS0105265	0.120857	0.254701	-0.157466	0.101514	5.4144	0.0181564	0.00402321	0.00937388	0.0114343	0.0114343	acetyl-CoA carboxylase biotin carboxylase subunit	272	218	207	200	185	279
G372_RS0110380	0.121288	0.255408	0.133918	0.0864327	6.50052	0.00625722	0.00156353	-0.000467273	0.00964239	0.00964239	hypothetical protein	874	694	819	531	490	669
G372_RS0109650	0.121467	0.255584	-0.188468	0.121699	5.93826	0.0284288	0.00260753	0.0196083	0.0101303	0.0196083	hypothetical protein	388	405	360	331	308	512
G372_RS13440	0.121748	0.255975	-0.213052	0.137677	5.67816	0.0363632	0.00364783	0.0247845	0.0106458	0.0247845	hypothetical protein	302.257	251.379	328.409	378.027	214.19	306.193
G372_RS0100340	0.121896	0.256086	-0.322227	0.20831	4.48894	0.0832207	0.0113597	0.0537298	0.0174407	0.0537298	hypothetical protein	68	76	114	100	96	85
G372_RS0111945	0.122777	0.257737	-0.136447	0.0884168	7.40485	0.0101653	0.000590689	0.00513428	0.0111356	0.0111356	ABC transporter substrate-binding protein	1877	1364	1952	1614	1403	1741
G372_RS0101040	0.124036	0.259973	-0.264669	0.172081	4.63332	0.0565492	0.0101928	0.0342249	0.0163077	0.0342249	hypothetical protein	112	102	87	91	77	165
G372_RS14030	0.124017	0.259973	-0.58104	0.377758	2.17323	0.226538	0.151569	0.00500034	0.062482	0.062482	hypothetical protein	10.0391	6.02816	5.06524	8.01916	6.06001	21
G372_RS0111665	0.124306	0.260336	0.186882	0.121593	4.88673	0.0174542	0.00766283	0.00105797	0.0145145	0.0145145	transcriptional repressor	174	136	178	106	104	114
G372_RS0101235	0.12445	0.260435	-0.137194	0.089298	7.50931	0.0117586	0.000532202	0.00710771	0.011429	0.011429	glycoside hydrolase	1896	1548	2327	1726	1482	2111
G372_RS0106145	0.124927	0.261229	0.160017	0.104285	5.40712	0.0159951	0.00485199	0.00553991	0.0114611	0.0114611	hypothetical protein	290	221	302	167	146	257
G372_RS0106590	0.125381	0.261696	0.148793	0.0970871	5.66637	0.0121207	0.00346231	0.00338633	0.0106766	0.0106766	ABC transporter ATP-binding protein	365	287	396	248	218	257
G372_RS0109830	0.125286	0.261696	0.24152	0.157552	4.09492	0.0472867	0.0162641	0.0209697	0.0209422	0.0209697	hypothetical protein	74	66	86	37	53	54
G372_RS0112785	0.125443	0.261696	-0.162096	0.105785	5.29391	0.0176694	0.00484924	0.00738427	0.0119364	0.0119364	hypothetical protein	207	198	207	200	180	201
G372_RS0105340	0.125562	0.261742	-0.227494	0.148511	7.7026	0.0419926	0.000450061	0.032633	0.0120143	0.032633	ATP-binding protein	2599	1598	2565	2770	1768	2255
G372_RS0103645	0.126086	0.26263	0.151064	0.0987528	5.57835	0.01493	0.00371412	0.00639074	0.0109141	0.0109141	SMC-Scp complex subunit ScpB	344	249	373	225	201	235
G372_RS0109320	0.127218	0.264783	0.140079	0.0918455	5.96971	0.0126791	0.00256799	0.00592257	0.0100854	0.0100854	aminodeoxychorismate lyase	507	405	496	343	303	337
G372_RS0102380	0.127634	0.265238	0.130996	0.0859838	6.50144	0.00864097	0.00144733	0.00291888	0.00964249	0.00964249	DUF721 domain-containing protein	804	705	875	604	460	631
G372_RS0107255	0.127571	0.265238	0.144887	0.0950857	6.14932	0.0171472	0.00229537	0.0112666	0.0098533	0.0112666	AI-2E family transporter	583	577	523	396	308	489
G372_RS0105765	0.128088	0.265976	-0.175063	0.115045	5.06963	0.0138164	0.00658943	-0.00081148	0.0132637	0.0132637	hypothetical protein	187	128	177	163	122	189
G372_RS0108555	0.129088	0.267846	-0.272286	0.179407	4.5443	0.060866	0.0115658	0.0367143	0.0169968	0.0367143	cyclic nucleotide-binding domain-containing protein	123	56	109	97	87	106
G372_RS0102065	0.129243	0.267959	-0.1356	0.0893813	6.16493	0.0123294	0.00214804	0.00636843	0.00983549	0.00983549	3-dehydroquinate synthase	493	416	590	472	406	497
G372_RS0110400	0.129444	0.26817	-0.154181	0.101682	5.47084	0.0195387	0.00406758	0.0114414	0.0112389	0.0114414	DNA-binding response regulator	268	180	303	210	207	280
G372_RS0102970	0.130306	0.269126	0.129716	0.0857399	6.7839	0.0107142	0.00118675	0.00589618	0.00984025	0.00984025	histidine--tRNA ligase	1218	933	1017	670	643	952
G372_RS0104315	0.130189	0.269126	0.161298	0.106583	5.28827	0.0106804	0.00507616	-0.00148197	0.0119636	0.0119636	hypothetical protein	246	205	269	157	149	187
G372_RS0108190	0.130204	0.269126	0.131908	0.0871657	7.2049	0.00643449	0.000779458	0.00073879	0.0106173	0.0106173	BCCT family transporter	1764	1425	1632	1148	911	1383
G372_RS0109590	0.130213	0.269126	-0.17431	0.115188	5.58112	0.0250371	0.00452435	0.0153781	0.0109063	0.0153781	glycine cleavage system protein R	280	224	315	299	231	253
G372_RS0112560	0.130433	0.269181	0.140851	0.0931308	7.88333	0.0141999	0.000397013	0.00991322	0.012613	0.012613	DUF3581 domain-containing protein	3597	2560	3458	2532	1810	2385
G372_RS0101515	0.131031	0.269587	-0.599869	0.397252	5.15399	0.297324	0.00615572	0.230558	0.0127153	0.230558	30S ribosomal protein S18	144	177	113	128	145	494
G372_RS0102925	0.130946	0.269587	0.206788	0.136911	6.30378	0.0353218	0.00186674	0.0262501	0.00970634	0.0262501	metallophosphoesterase	765	630	637	361	360	665
G372_RS0107435	0.131019	0.269587	-0.274572	0.181824	7.7808	0.0622888	0.000419973	0.0491699	0.0122672	0.0491699	hypothetical protein	1901	2472	2671	2888	2173	2388
G372_RS0109410	0.130993	0.269587	-0.216607	0.14343	4.40072	0.0185515	0.0126866	-0.0070918	0.0181716	0.0181716	hypothetical protein	85	67	93	81	74	89
G372_RS0100175	0.131767	0.270686	-0.327217	0.217107	3.29561	0.0669273	0.0389183	0.00458921	0.0317845	0.0317845	polysaccharide deacetylase	37	21	20	28	24	33
G372_RS0111050	0.131738	0.270686	-0.511481	0.339339	5.83198	0.216665	0.00303013	0.169697	0.0103029	0.169697	hypothetical protein	173	315	464	298	416	497
G372_RS0104575	0.132038	0.271036	-0.281946	0.187201	5.77938	0.0659013	0.00331346	0.049253	0.0104053	0.049253	hypothetical protein	340	300	299	286	229	569
G372_RS0106675	0.132238	0.27124	-0.314387	0.208849	3.33024	0.067957	0.0342548	0.0136268	0.031172	0.031172	NnrS family protein	35	18	28	31	19	41
G372_RS0112015	0.134053	0.274753	0.303603	0.20263	3.61304	0.0769233	0.0315163	0.0300723	0.0267068	0.0300723	hypothetical protein	35	51	60	26	22	39
G372_RS0103850	0.134249	0.274943	-0.181047	0.120895	4.8961	0.014828	0.00747146	-0.00122815	0.0144519	0.0144519	succinylglutamate desuccinylase	162	109	141	121	112	166
G372_RS0108715	0.134527	0.275104	-0.382737	0.255758	5.61834	0.122441	0.00404172	0.0940762	0.0108041	0.0940762	phosphoribosylformylglycinamidine cyclo-ligase	319	257	197	233	214	536
G372_RS0113255	0.134532	0.275104	0.20073	0.134136	4.59236	0.0329474	0.0103676	0.015707	0.016621	0.016621	glutaredoxin	109	128	127	69	68	108
G372_RS0109535	0.134684	0.275206	0.171712	0.11479	6.67762	0.0246576	0.00122615	0.0185389	0.00973265	0.0185389	3-phosphoshikimate 1-carboxyvinyltransferase	836	883	1212	651	547	786
G372_RS0112810	0.134871	0.275379	-0.188394	0.126002	6.751	0.0296996	0.00119214	0.0226227	0.00980295	0.0226227	energy-dependent translational throttle protein EttA	946	854	804	768	633	1232
G372_RS0108360	0.134993	0.275418	0.178904	0.119693	6.75122	0.0267936	0.00127187	0.0202176	0.00980319	0.0202176	phosphomethylpyrimidine synthase ThiC	1005	952	1179	819	612	689
G372_RS0109130	0.135355	0.275738	0.128979	0.0863708	6.47312	0.00964624	0.00154874	0.00427074	0.00964113	0.00964113	ATP-dependent DNA helicase	859	704	751	533	428	708
G372_RS0110185	0.135304	0.275738	0.144219	0.0965635	5.75474	0.0113873	0.00352861	0.00290589	0.0104582	0.0104582	1-acyl-sn-glycerol-3-phosphate acyltransferase	402	313	427	233	231	339
G372_RS0101785	0.135859	0.276556	-0.134828	0.0904045	6.09613	0.00933914	0.00234138	0.00251554	0.00991806	0.00991806	transcription-repair coupling factor	500	435	453	439	337	523
G372_RS0104880	0.13682	0.2783	-0.196988	0.132408	4.6144	0.0180046	0.00984608	-0.00189196	0.0164516	0.0164516	NAD(P)-dependent oxidoreductase	106	90	109	90	80	137
G372_RS0100165	0.137323	0.278902	-0.193161	0.130002	4.71308	0.031474	0.00881851	0.0165323	0.0157163	0.0165323	UDP-N-acetylglucosamine 2-epimerase (non-hydrolyzing)	136	95	109	91	89	163
G372_RS13795	0.137295	0.278902	0.422602	0.2844	4.32246	0.150638	0.0269558	0.0943695	0.0188438	0.0943695	glyoxalase/bleomycin resistance/dioxygenase family protein	145.091	87.7391	86.1743	36.2478	43.2577	102.151
G372_RS0111215	0.137844	0.279748	-0.323064	0.217717	3.19878	0.037338	0.0375215	-0.0299879	0.0335797	0.0335797	acyl carrier protein	23	22	23	23	23	31
G372_RS0103765	0.137956	0.279764	-0.212705	0.143386	4.38108	0.0300426	0.012501	0.00808599	0.0183382	0.0183382	glycine cleavage system protein H	70	71	101	80	71	88
G372_RS0113365	0.138148	0.279943	-0.133322	0.089917	6.12266	0.00828273	0.00224257	0.00144531	0.00988502	0.00988502	lysine--tRNA ligase	518	431	479	466	345	520
G372_RS0104430	0.139525	0.282519	-0.289522	0.195946	6.13896	0.0712205	0.00196284	0.0556291	0.00986544	0.0556291	flagellar motor switch protein FliM	366	563	431	510	395	551
G372_RS0105450	0.139635	0.282529	-0.248459	0.168202	4.93307	0.0524697	0.007615	0.0348226	0.014201	0.0348226	hypothetical protein	124	137	148	177	120	131
G372_RS0107935	0.140104	0.283052	-0.127888	0.0866798	7.19117	0.0130683	0.000686283	0.0095159	0.0105838	0.0105838	hypothetical protein	1548	1119	1539	1332	1172	1313
G372_RS0111425	0.140102	0.283052	-0.257023	0.174204	3.81945	0.0435238	0.021537	0.00809499	0.0239835	0.0239835	peptide deformylase	51	35	48	35	43	65
G372_RS0101555	0.14046	0.283333	0.187893	0.127464	4.74837	0.0217854	0.00890819	0.00508462	0.0154626	0.0154626	protein disulfide oxidoreductase	153	122	149	78	93	114
G372_RS0107505	0.140396	0.283333	0.125887	0.0853869	6.65011	0.0088684	0.00122541	0.00391722	0.00971096	0.00971096	NAD(P)/FAD-dependent oxidoreductase	939	780	1050	687	562	715
G372_RS0110055	0.140559	0.283333	0.153771	0.104342	5.49057	0.0140906	0.0051558	0.00359043	0.0111752	0.0111752	hypothetical protein	318	232	334	178	173	264
G372_RS0100055	0.140704	0.283358	-0.161339	0.109517	5.64394	0.0222019	0.00333775	0.0146534	0.0107357	0.0146534	thiamine-phosphate kinase	312	291	268	262	209	378
G372_RS0102120	0.14087	0.283358	0.128517	0.0872743	7.23563	0.00619079	0.000731847	0.000812955	0.0106933	0.0106933	50S ribosomal protein L19	1751	1459	1752	1229	963	1347
G372_RS0110830	0.140888	0.283358	-0.145516	0.098823	5.6157	0.0153645	0.00383775	0.00742733	0.0108112	0.0108112	hypothetical protein	282	249	326	264	253	278
G372_RS0108580	0.141387	0.28415	0.200838	0.136565	5.3403	0.0344806	0.00502561	0.0229492	0.011727	0.0229492	MBL fold metallo-hydrolase	277	214	284	131	146	252
G372_RS0103810	0.141948	0.285064	0.133472	0.0908852	5.97315	0.00746466	0.00230959	0.000340717	0.0100806	0.0100806	LysR family transcriptional regulator	505	388	520	322	296	375
G372_RS0102910	0.142204	0.285322	0.917989	0.625489	7.10815	0.722295	0.00143799	0.585418	0.0103913	0.585418	hypothetical protein	2472	1961	2059	249	517	2581
G372_RS0104935	0.142289	0.285322	-0.464053	0.316259	4.71538	0.184627	0.00907373	0.140956	0.0156996	0.140956	UPF0016 domain-containing protein	117	115	70	80	113	221
G372_RS0105630	0.142673	0.285878	-0.183972	0.125501	4.80579	0.0157415	0.00856546	-0.00158077	0.0150601	0.0150601	succinate dehydrogenase assembly factor 2	139	95	143	122	96	147
G372_RS0100560	0.143473	0.287267	-0.327748	0.224028	5.18478	0.0924516	0.005586	0.0696966	0.0125274	0.0696966	septum site-determining protein MinC	202	142	166	141	137	346
G372_RS0106655	0.143715	0.287538	-0.128328	0.0877697	6.31487	0.0136964	0.00185664	0.0090884	0.00969865	0.00969865	catalase/peroxidase HPI	627	436	702	523	423	668
G372_RS0106465	0.143874	0.287641	0.171081	0.117057	5.56728	0.0252233	0.00361348	0.01694	0.0109453	0.01694	N-acetyltransferase	292	298	366	211	212	223
G372_RS0110900	0.144674	0.289025	-0.212752	0.14586	4.99003	0.0391093	0.00703815	0.0248747	0.0138085	0.0248747	hypothetical protein	151	140	149	134	102	229
G372_RS13890	0.144815	0.289092	0.247279	0.169591	5.3544	0.0528574	0.00997263	0.033169	0.0116677	0.033169	glyoxalase/bleomycin resistance/dioxygenase family protein	348.509	237.553	227.472	133.134	144.221	244.233
G372_RS0100485	0.145754	0.290535	0.15325	0.105349	6.09011	0.0203637	0.00246991	0.0141776	0.00992577	0.0141776	toluene tolerance protein	597	486	514	403	337	363
G372_RS0103410	0.14571	0.290535	0.188655	0.129673	4.68138	0.0146301	0.0092743	-0.00433323	0.0159483	0.0159483	ribosomal-protein-alanine N-acetyltransferase	145	118	133	84	82	98
G372_RS0102385	0.146424	0.291092	-0.140142	0.096498	8.16821	0.011886	0.000305675	0.00718693	0.0136621	0.0136621	UDP-3-O-acyl-N-acetylglucosamine deacetylase	3840	3240	3947	3699	2508	4222
G372_RS0102560	0.146498	0.291092	-0.180349	0.124206	4.80344	0.0245755	0.00806439	0.0104579	0.0150764	0.0150764	ZIP family metal transporter	153	111	111	131	103	126
G372_RS0103545	0.146566	0.291092	0.16398	0.112952	9.2666	0.0165107	0.000100283	0.0104545	0.019037	0.019037	methionine adenosyltransferase	12287	12760	13341	9029	6833	10858
G372_RS0107250	0.146575	0.291092	0.17409	0.119918	4.96059	0.0211625	0.00755882	0.00752904	0.0140118	0.0140118	hypothetical protein	188	150	183	119	82	164
G372_RS0112800	0.146236	0.291092	0.155853	0.107266	5.23519	0.0151345	0.00502062	0.00478864	0.0122385	0.0122385	hypothetical protein	266	176	245	168	134	167
G372_RS0110230	0.147072	0.291863	-0.282977	0.195163	4.10145	0.069729	0.0183722	0.0387606	0.0208774	0.0387606	D-tyrosyl-tRNA(Tyr) deacylase	52	73	51	54	56	79
G372_RS0103105	0.147202	0.291906	0.126617	0.087353	6.68673	0.0139662	0.00120131	0.0102445	0.0097404	0.0102445	NADH-quinone oxidoreductase subunit NuoB	1030	947	881	693	593	749
G372_RS0103350	0.147462	0.292206	-0.407244	0.281138	4.40815	0.144601	0.0134371	0.105121	0.0181089	0.105121	methylthioribulose 1-phosphate dehydratase	86	80	59	65	65	172
G372_RS0110210	0.147644	0.292351	0.219144	0.151353	4.20012	0.0416429	0.0144237	0.0196209	0.0199377	0.0199377	lipid A biosynthesis acyltransferase	84	73	91	53	58	49
G372_RS0103315	0.147926	0.292693	0.179835	0.12429	5.08914	0.02824	0.00739485	0.0157773	0.0131333	0.0157773	electron transport complex subunit RsxE	170	191	236	133	122	144
G372_RS0102865	0.148098	0.292817	-0.229213	0.158484	5.65382	0.0459021	0.00383756	0.0338382	0.0107095	0.0338382	tetratricopeptide repeat protein	347	216	302	220	249	431
G372_RS0104805	0.148494	0.293109	-0.145283	0.100551	5.55588	0.00737041	0.00418774	-0.00288992	0.010978	0.010978	ribonuclease HI	304	228	276	253	205	299
G372_RS0106845	0.148572	0.293109	0.200526	0.138811	5.83218	0.0351854	0.0030421	0.0258607	0.0103025	0.0258607	glucose-6-phosphate isomerase	471	323	485	313	262	258
G372_RS0111370	0.148499	0.293109	-0.358756	0.248299	4.76977	0.112595	0.00931667	0.0831622	0.015311	0.0831622	DUF3427 domain-containing protein	120	96	113	87	95	243
G372_RS0108725	0.149001	0.293523	0.164549	0.114027	5.05989	0.0210752	0.00617392	0.0100164	0.0133294	0.0133294	AI-2E family transporter	191	191	188	113	125	155
G372_RS0109395	0.148923	0.293523	-0.528958	0.366481	2.65163	0.245109	0.0890554	0.112407	0.0464181	0.112407	tRNA-Asn	6	18	14	17	13	19
G372_RS0104015	0.149525	0.294125	-0.237486	0.164782	5.84908	0.0495037	0.00303421	0.0376956	0.0102724	0.0376956	TraB family protein	367	327	335	293	256	573
G372_RS0112860	0.149439	0.294125	-0.156777	0.108758	5.23476	0.0161268	0.00550173	0.00543962	0.0122408	0.0122408	oxidoreductase	190	182	207	178	174	194
G372_RS0103245	0.149762	0.294159	0.141879	0.0985016	5.51487	0.0174018	0.0034543	0.0107494	0.0110995	0.0110995	ubiquinone biosynthesis protein UbiH	313	235	354	220	190	213
G372_RS0111925	0.14974	0.294159	-0.24555	0.170467	4.19958	0.0529594	0.0166183	0.0269704	0.0199427	0.0269704	ribonuclease HII	67	71	58	66	46	100
G372_RS0102580	0.150181	0.294766	-0.149802	0.104109	6.24197	0.0197385	0.00199577	0.0142622	0.00975678	0.0142622	thiol peroxidase	638	378	619	522	405	580
G372_RS0101580	0.150375	0.294932	-0.159416	0.110844	5.14485	0.0190869	0.00565693	0.00867167	0.0127725	0.0127725	hypothetical protein	204	132	202	150	159	193
G372_RS0101140	0.150875	0.295566	-0.402768	0.280391	3.98781	0.14301	0.0184969	0.0994319	0.0220506	0.0994319	dihydroneopterin aldolase	45	48	53	38	46	116
G372_RS0110430	0.150918	0.295566	-0.433887	0.302087	4.56929	0.165985	0.0101901	0.126695	0.0168004	0.126695	SulP family inorganic anion transporter	108	89	66	78	74	213
G372_RS0111700	0.151742	0.296963	-0.225481	0.157304	7.23792	0.044946	0.000673631	0.0364433	0.0106991	0.0364433	DUF4426 domain-containing protein	1448	1032	1773	1635	1267	1318
G372_RS0108885	0.152705	0.298631	-0.160294	0.112091	5.08852	0.0167646	0.00570903	0.00561137	0.0131374	0.0131374	flavodoxin-dependent (E)-4-hydroxy-3-methylbut-2-enyl-diphosphate synthase	177	165	157	148	127	207
G372_RS0106930	0.153127	0.299021	0.134886	0.0944201	5.79736	0.0151342	0.00300399	0.00909097	0.0103687	0.0103687	apolipoprotein N-acyltransferase	429	335	419	300	254	276
G372_RS0106975	0.153049	0.299021	-0.266891	0.186788	6.23665	0.0632367	0.00189185	0.0504425	0.00976168	0.0504425	polynucleotide adenylyltransferase PcnB	587	512	410	451	389	820
G372_RS0103705	0.154333	0.301157	-0.262303	0.184151	3.67094	0.0464114	0.0249668	0.00724627	0.0259006	0.0259006	DUF1841 domain-containing protein	42	28	46	31	39	52
G372_RS0105155	0.154525	0.301312	-0.178166	0.12514	5.87527	0.0283149	0.00275853	0.0207315	0.0102279	0.0207315	regulatory protein RecX	369	312	413	365	351	332
G372_RS0106005	0.154788	0.301597	-0.331186	0.232767	6.71061	0.097922	0.00124911	0.0800217	0.00976203	0.0800217	rod shape-determining protein	913	819	621	689	639	1493
G372_RS0111320	0.154895	0.301597	-0.252512	0.177519	4.01085	0.0569443	0.0223262	0.0249433	0.0218046	0.0249433	class I SAM-dependent methyltransferase	76	39	52	44	54	73
G372_RS0105795	0.156212	0.30394	0.125901	0.088792	6.48273	0.0142161	0.00156068	0.0102654	0.00964116	0.0102654	RNA ligase partner protein	870	605	884	563	515	576
G372_RS0111990	0.157202	0.305646	0.178576	0.126243	4.80072	0.0278084	0.00881076	0.0139912	0.0150951	0.0150951	2-C-methyl-D-erythritol 4-phosphate cytidylyltransferase	198	121	134	93	80	132
G372_RS0109955	0.158198	0.30736	-0.137804	0.0976534	8.2656	0.0136594	0.000252818	0.00970014	0.0140515	0.0140515	hypothetical protein	4605	3292	4354	4076	3315	3869
G372_RS0104300	0.158477	0.307678	-0.182299	0.12927	4.70619	0.0121073	0.00929982	-0.00662798	0.0157664	0.0157664	FAD-binding oxidoreductase	123	95	120	114	93	120
G372_RS0103525	0.158963	0.308241	0.204491	0.145177	7.28068	0.0378366	0.000749888	0.0308646	0.0108071	0.0308646	hypothetical protein	2162	1295	2051	1087	856	1750
G372_RS0106755	0.158996	0.308241	-0.125082	0.0888077	6.20766	0.00587253	0.00204038	-0.000566778	0.00978984	0.00978984	DNA topoisomerase IV subunit B	559	463	540	485	410	536
G372_RS0101975	0.159227	0.308467	0.278476	0.197827	4.87479	0.0702273	0.00802251	0.0506807	0.0145938	0.0506807	divalent-cation tolerance protein CutA	132	203	174	105	94	107
G372_RS0110590	0.159352	0.308486	0.256939	0.182582	4.05034	0.0598089	0.0217393	0.0282651	0.0213927	0.0282651	DUF58 domain-containing protein	84	63	71	33	37	74
G372_RS0111910	0.160332	0.310161	0.133513	0.0950981	5.77033	0.0102176	0.00314117	0.00294614	0.0104243	0.0104243	lipid-A-disaccharide synthase	410	328	412	277	247	284
G372_RS0103370	0.16121	0.311197	0.177936	0.127005	4.7975	0.0268131	0.00907812	0.0125653	0.0151175	0.0151175	carbamate kinase	149	130	164	109	95	94
G372_RS0103520	0.161216	0.311197	0.235557	0.168136	9.33964	0.0505698	9.51491e-05	0.0423093	0.0194751	0.0423093	hybrid sensor histidine kinase/response regulator	18198	9949	16013	7804	6922	13867
G372_RS0105120	0.161038	0.311197	-0.134327	0.0958389	5.76889	0.00790191	0.00335028	-0.000239266	0.0104274	0.0104274	exodeoxyribonuclease V subunit gamma	359	297	346	307	278	339
G372_RS0112550	0.161699	0.311907	-0.198333	0.141729	4.57916	0.0359054	0.0105607	0.0195701	0.0167234	0.0195701	DUF4440 domain-containing protein	113	96	86	92	69	140
G372_RS0109000	0.161862	0.311997	-0.621036	0.443966	3.00377	0.352233	0.0583268	0.237332	0.0375962	0.237332	tRNA-Pro	19	26	8	17	19	44
G372_RS0105350	0.162348	0.312539	-0.282375	0.202098	4.87899	0.0729333	0.0076684	0.0535972	0.014566	0.0535972	YaiI/YqxD family protein	148	108	127	111	93	241
G372_RS0109845	0.162492	0.312539	-0.199585	0.142893	4.40534	0.020849	0.0124952	-0.00137171	0.0181326	0.0181326	class I SAM-dependent methyltransferase	84	82	80	74	75	95
G372_RS0112625	0.162437	0.312539	0.420958	0.301346	3.62961	0.162133	0.0309261	0.105288	0.0264727	0.105288	thiol reductant ABC exporter subunit CydD	68	33	60	16	26	47
G372_RS0113015	0.163097	0.313477	0.174237	0.124925	4.82753	0.0224506	0.00849813	0.00818072	0.0149111	0.0149111	AraC family transcriptional regulator	166	124	168	114	94	100
G372_RS0106230	0.163381	0.313798	0.121133	0.086909	6.45409	0.0085088	0.00168739	0.00344616	0.00964236	0.00964236	PTS mannose transporter subunit IIA	771	715	769	533	424	683
G372_RS0101300	0.16373	0.314244	0.145346	0.104368	5.3768	0.0170717	0.0047618	0.00865578	0.0115771	0.0115771	dTDP-4-dehydrorhamnose 3,5-epimerase	248	230	303	182	170	189
G372_RS0104425	0.163945	0.31439	-0.25123	0.180491	5.2932	0.0580272	0.00525762	0.0436077	0.0119398	0.0436077	flagellar motor switch protein FliN	171	222	195	250	158	209
G372_RS0111725	0.16404	0.31439	0.121168	0.0870703	6.42061	0.0109765	0.00172332	0.00649163	0.00964854	0.00964854	haloacid dehalogenase	743	627	823	531	386	681
G372_RS0111960	0.165001	0.316007	-0.124078	0.0893646	7.48013	0.0064172	0.000633574	0.00161468	0.0113455	0.0113455	GGDEF domain-containing protein	2050	1581	1969	1799	1357	1987
G372_RS0101375	0.165438	0.316619	-0.271695	0.195885	3.60643	0.0591291	0.0307554	0.0154741	0.0268011	0.0268011	BolA family transcriptional regulator	37	37	32	39	24	56
G372_RS0111890	0.165569	0.316644	0.119048	0.0858571	6.59543	0.0115682	0.00138161	0.00776394	0.00967555	0.00967555	membrane protein	892	722	1003	697	495	686
G372_RS0102030	0.166468	0.318136	-0.145157	0.104909	8.7735	0.00849267	0.000159157	0.00255527	0.0163497	0.0163497	pilus assembly protein PilM	7390	5471	7411	6539	5128	7235
G372_RS0100620	0.167075	0.319069	0.242844	0.175762	6.79175	0.0547628	0.00116024	0.0451783	0.00984969	0.0451783	50S ribosomal protein L1	1105	1128	1125	897	629	628
G372_RS0101970	0.167805	0.320008	0.251537	0.182367	5.22568	0.0588904	0.00594931	0.0439371	0.0122911	0.0439371	HlyD family secretion protein	194	243	273	157	146	138
G372_RS0106965	0.167799	0.320008	0.265466	0.192463	5.23632	0.0655923	0.00585955	0.0497036	0.0122323	0.0497036	RNA-binding S4 domain-containing protein	230	198	298	164	156	125
G372_RS0103800	0.167979	0.320114	-0.161525	0.117155	4.95805	0.00906789	0.00655876	-0.00500777	0.0140293	0.0140293	molybdenum cofactor biosynthesis protein B	154	127	158	143	118	156
G372_RS13470	0.168516	0.320799	0.144204	0.104724	5.35377	0.0135307	0.00478046	0.00433491	0.0116703	0.0116703	phosphatidylinositol kinase	269	210	285	190	129	223
G372_RS0111600	0.168578	0.320799	-0.489298	0.355391	5.70191	0.223387	0.0035475	0.185907	0.0105841	0.185907	protein-L-isoaspartate O-methyltransferase	297	259	230	221	226	807
G372_RS0104075	0.169272	0.321892	0.119026	0.0865927	6.5083	0.00676538	0.00160404	0.00154001	0.00964341	0.00964341	cAMP-activated global transcriptional regulator CRP	837	650	914	541	486	693
G372_RS0113300	0.169731	0.322538	-0.127322	0.0927281	5.95703	0.0072843	0.00279452	0.000231765	0.0101032	0.0101032	3',5'-cyclic-nucleotide phosphodiesterase	408	355	453	377	295	453
G372_RS0100275	0.170786	0.32317	0.117406	0.0857176	7.01073	0.00829114	0.000829708	0.00436515	0.0101916	0.0101916	prepilin-type cleavage/methylation domain-containing protein	1523	1032	1426	885	789	1182
G372_RS0101810	0.170587	0.32317	-0.11895	0.0868046	6.8929	0.0132868	0.00105807	0.0102445	0.00998884	0.0102445	ribonuclease	1004	1044	1053	980	813	1037
G372_RS0110640	0.170729	0.32317	0.168035	0.122665	6.76346	0.0265268	0.00123474	0.0213354	0.00981667	0.0213354	tryptophan synthase subunit beta	1200	981	978	851	596	718
G372_RS0111145	0.170769	0.32317	-0.308259	0.225049	3.24357	0.08187	0.0432369	0.0234668	0.0327338	0.0327338	N-acetyltransferase	21	26	25	19	23	42
G372_RS0112095	0.170242	0.32317	-0.223151	0.162714	6.8398	0.0467098	0.0011519	0.0385618	0.0099117	0.0385618	hypothetical protein	797	971	1040	1039	877	904
G372_RS0113275	0.170547	0.32317	0.361782	0.263989	2.87187	0.0927648	0.0638885	0.00298507	0.0406465	0.0406465	phosphate ABC transporter, permease protein PstA	20	29	21	11	10	19
G372_RS0104290	0.170928	0.323211	-0.327985	0.23954	4.371	0.101128	0.01268	0.0733893	0.0184242	0.0733893	decaprenyl-phosphate phosphoribosyltransferase	77	83	64	56	78	132
G372_RS0109420	0.17157	0.324198	-0.267513	0.195668	4.04859	0.0674121	0.0159774	0.0414516	0.0214106	0.0414516	hypothetical protein	64	55	48	71	56	50
G372_RS0111390	0.172095	0.32496	-0.272288	0.199404	3.68984	0.0699568	0.0300002	0.029643	0.0256449	0.029643	DUF3775 domain-containing protein	48	25	47	33	32	64
G372_RS0101255	0.172396	0.325301	0.161442	0.118312	5.00993	0.0103308	0.00732551	-0.00418584	0.0136711	0.0136711	type II toxin-antitoxin system RelE/ParE family toxin	201	153	191	113	106	158
G372_RS0101250	0.173235	0.326046	-0.206873	0.151902	4.88694	0.0405281	0.00807848	0.0265329	0.0145131	0.0265329	hypothetical protein	172	122	111	112	111	183
G372_RS0105465	0.172966	0.326046	0.155201	0.113889	5.45202	0.022791	0.00459507	0.014861	0.0113018	0.014861	PIN domain-containing protein	274	234	343	227	156	204
G372_RS0105565	0.173233	0.326046	-0.462861	0.339868	3.74668	0.202884	0.0274957	0.145769	0.0248967	0.145769	DUF4212 domain-containing protein	36	41	34	27	40	99
G372_RS0111085	0.173276	0.326046	-0.129182	0.0948643	5.81729	0.00530287	0.00316869	-0.00279806	0.0103302	0.0103302	CBS domain-containing protein	384	301	372	314	279	379
G372_RS0108215	0.173491	0.326222	-0.186426	0.13697	4.55549	0.0160285	0.0112328	-0.0042302	0.0169085	0.0169085	cell division ATP-binding protein FtsE	104	81	105	99	69	119
G372_RS0109510	0.173853	0.326445	0.146438	0.107681	6.12463	0.0203473	0.00254433	0.0148483	0.00988262	0.0148483	hypothetical protein	637	506	508	356	289	537
G372_RS14085	0.173774	0.326445	-0.305693	0.224745	3.26594	0.0624998	0.0434444	-0.00036274	0.0323214	0.0323214	hypothetical protein	24.4616	20.3079	29.5701	26.3447	17.3658	42.7976
G372_RS0105180	0.174223	0.326912	-0.575193	0.423323	4.7443	0.314296	0.0105619	0.258241	0.0154915	0.258241	hypothetical protein	124	113	62	100	79	326
G372_RS13730	0.175457	0.328998	0.247833	0.18292	3.77708	0.0356457	0.0256803	-0.00415626	0.0245091	0.0245091	glyoxalase/bleomycin resistance/dioxygenase family protein	59.9298	48.4304	55.8412	36.5537	22.83	47.9245
G372_RS0107360	0.17559	0.329017	0.117249	0.0865653	6.37789	0.00682691	0.00157686	0.00180152	0.00966345	0.00966345	cytochrome c550	756	582	762	527	388	604
G372_RS0109530	0.175863	0.3293	-0.119837	0.0885321	6.24735	0.00663107	0.00200499	0.000898483	0.00975191	0.00975191	(d)CMP kinase	546	496	586	501	395	602
G372_RS13690	0.176408	0.33009	-0.421754	0.311972	2.45966	0.148948	0.0937589	0.025723	0.0522305	0.0522305	hypothetical protein	9.08217	15.1767	7.16003	11.242	10.1389	17.2199
G372_RS0103560	0.17714	0.331145	0.120813	0.0895166	7.54404	0.00731128	0.00048974	0.00317595	0.0115301	0.0115301	phosphoglycerate kinase	2388	1861	2512	1709	1317	1808
G372_RS0103685	0.177219	0.331145	-0.337529	0.250139	3.801	0.109261	0.025778	0.0680759	0.0242104	0.0680759	RND transporter	46	41	38	40	29	90
G372_RS0100790	0.178169	0.33269	0.240381	0.178534	3.74352	0.0432786	0.0228744	0.00955519	0.0249374	0.0249374	gamma-glutamylcyclotransferase	68	38	56	27	33	41
G372_RS0103860	0.178952	0.333919	0.132852	0.0988488	5.61555	0.00986731	0.00384501	0.00187052	0.0108116	0.0108116	hypothetical protein	327	282	377	228	181	296
G372_RS13465	0.179132	0.334023	-0.128549	0.095687	6.00991	0.0159447	0.00260058	0.0111334	0.0100306	0.0111334	YbhB/YbcL family Raf kinase inhibitor-like protein	447	321	535	379	350	446
G372_RS0112500	0.179689	0.33483	0.176232	0.131349	6.08678	0.0300204	0.00223286	0.0236459	0.00993005	0.0236459	serine O-acetyltransferase	724	418	505	389	267	454
G372_RS0100705	0.179948	0.33508	0.11612	0.0865978	7.13962	0.00693829	0.000786911	0.00282948	0.0104618	0.0104618	dienelactone hydrolase	1521	1270	1705	1045	955	1220
G372_RS0112400	0.180392	0.335673	-0.469454	0.350457	8.44216	0.2135	0.00024248	0.183987	0.0147986	0.183987	OmpW family protein	2499	3901	6992	5583	5760	4541
G372_RS0103735	0.180565	0.335764	-0.117423	0.0876938	6.2778	0.0125457	0.00180926	0.00870221	0.00972604	0.00972604	chorismate synthase	614	514	553	446	419	696
G372_RS0113270	0.180879	0.336115	0.403322	0.301424	2.52971	0.0695267	0.0862661	-0.0603584	0.0500186	0.0500186	phosphate ABC transporter ATP-binding protein	19	17	14	8	7	12
G372_RS0101060	0.181656	0.337091	0.114561	0.0857702	6.68539	0.00744428	0.00129555	0.0030882	0.00973925	0.00973925	DUF1043 domain-containing protein	995	759	1113	666	573	818
G372_RS0112990	0.181654	0.337091	-0.169473	0.126881	4.79025	0.0153344	0.00898043	-0.000582791	0.0151678	0.0151678	nucleoside deaminase	125	106	139	121	108	123
G372_RS0107615	0.182152	0.33778	-0.29692	0.222553	3.30461	0.0438365	0.0426707	-0.0209357	0.0316239	0.0316239	nitrate ABC transporter, permease protein	27	23	27	25	30	29
G372_RS0109065	0.183813	0.340212	0.296604	0.223161	3.20097	0.0732976	0.0411632	0.0174684	0.0335378	0.0335378	phenylacetate--CoA ligase family protein	45	24	28	14	19	24
G372_RS0110470	0.183602	0.340212	0.146869	0.110449	5.20552	0.00932817	0.00589301	-0.00232178	0.0124055	0.0124055	cysteine hydrolase	247	194	216	153	134	170
G372_RS0111440	0.183843	0.340212	-0.322082	0.242346	2.96749	0.0764661	0.0496908	0.0069906	0.0384068	0.0384068	tRNA-Phe	21	16	17	14	23	25
G372_RS0101470	0.184358	0.340461	-0.221294	0.166705	7.39173	0.04804	0.00064583	0.04104	0.0110999	0.04104	FtsH protease activity modulator HflK	2000	1627	1300	1504	1230	2327
G372_RS0108630	0.184358	0.340461	0.18824	0.141805	4.4023	0.0347609	0.0118877	0.0182755	0.0181583	0.0182755	4Fe-4S dicluster domain-containing protein	98	82	122	60	48	101
G372_RS0100310	0.184325	0.340461	1.04894	0.790131	1.0396	1.07925	0.28881	0.64765	0.129685	0.64765	tRNA-Leu	10	5	2	0	1	5
G372_RS0111455	0.185961	0.343186	0.123059	0.0930415	7.87378	0.0063531	0.000404995	0.00185759	0.0125801	0.0125801	AsmA family protein	3561	2716	3115	2279	1841	2600
G372_RS0100980	0.186237	0.343459	-0.129916	0.0982876	8.31104	0.00881068	0.00025205	0.00443201	0.0142386	0.0142386	translation elongation factor Tu	4722.92	3803.82	4260.84	4222.76	3233.86	4335.78
G372_RS0103690	0.187098	0.344809	0.132357	0.10033	5.52204	0.013214	0.00402155	0.00592658	0.0110778	0.0110778	AcrB/AcrD/AcrF family protein	336	251	311	219	196	215
G372_RS0100625	0.187564	0.344844	0.142141	0.107861	7.14919	0.0200219	0.000729165	0.0167217	0.0104839	0.0167217	50S ribosomal protein L11	1502	1625	1444	1113	903	1199
G372_RS0103165	0.187412	0.344844	-0.113171	0.0858478	6.93565	0.0113735	0.000997376	0.00841667	0.0100574	0.0100574	carbamoyl-phosphate synthase small subunit	1122	854	1321	1028	825	1098
G372_RS0111855	0.18763	0.344844	0.114027	0.08654	7.12737	0.0104659	0.00079974	0.00740678	0.010434	0.010434	UMP kinase	1598	1255	1578	1199	872	1126
G372_RS0113115	0.187524	0.344844	-0.273939	0.207854	4.65048	0.0743569	0.0101409	0.0546642	0.0161784	0.0546642	flagella basal body P-ring formation protein FlgA	86	129	93	98	84	150
G372_RS0111965	0.188192	0.345405	-0.11712	0.0890004	7.48397	0.0105658	0.000525221	0.0075382	0.0113564	0.0113564	hypothetical protein	1942	1645	2042	1601	1304	2326
G372_RS0102240	0.18811	0.345405	0.62969	0.478418	8.68446	0.393614	0.000226167	0.3431	0.0159133	0.3431	23S ribosomal RNA	10655	4131	16663	7372	2518	3129
G372_RS13855	0.188544	0.345775	0.363897	0.276749	2.77821	0.115588	0.0718934	0.0229339	0.0429919	0.0429919	hypothetical protein	23	21	19	7	13	17
G372_RS0105885	0.188651	0.345775	0.148184	0.112723	6.35607	0.0218354	0.0018526	0.0172073	0.00967393	0.0172073	3-deoxy-D-manno-octulosonic acid kinase	852	510	757	427	393	658
G372_RS0104830	0.189146	0.346445	0.136281	0.103785	5.40208	0.0134084	0.00467719	0.00511855	0.0114799	0.0114799	tRNA (adenosine(37)-N6)-dimethylallyltransferase MiaA	246	242	309	195	154	213
G372_RS0107855	0.189533	0.346918	1.20879	0.92136	7.75118	1.45704	0.000902722	1.27245	0.0121703	1.27245	MFS transporter	6388	2778	5991	6208	677	352
G372_RS0106745	0.190019	0.34757	-0.223537	0.170571	3.94153	0.0174531	0.0210837	-0.0180057	0.022558	0.022558	DUF3634 domain-containing protein	56	44	53	51	40	66
G372_RS0102070	0.19015	0.347574	-0.118174	0.0901997	6.12184	0.00601494	0.00231797	-3.61789e-05	0.00988601	0.00988601	deoxyguanosinetriphosphate triphosphohydrolase	527	415	499	449	340	534
G372_RS0107530	0.190435	0.347857	0.178513	0.136343	5.4135	0.0318673	0.00501987	0.0228642	0.0114376	0.0228642	lipoate--protein ligase family protein	313	283	229	205	145	209
G372_RS0101760	0.190573	0.347873	-0.122422	0.0935316	5.79757	0.0148456	0.00275391	0.0101829	0.0103683	0.0103683	lipoprotein ABC transporter ATP-binding protein	388	336	314	308	289	348
G372_RS0106475	0.190993	0.348168	-0.269821	0.206341	8.97839	0.0729329	0.00012414	0.0637407	0.0174098	0.0637407	ribonucleoside-diphosphate reductase subunit alpha	7924	6210	9339	5504	8969	10956
G372_RS0110965	0.191022	0.348168	-0.199956	0.152923	4.11951	0.0231904	0.014378	-0.000383462	0.0207001	0.0207001	hypothetical protein	69	59	57	59	46	82
G372_RS0111830	0.191123	0.348168	-0.215382	0.164758	5.16306	0.046491	0.00543244	0.0352853	0.0126591	0.0352853	membrane protein	152	202	172	196	131	206
G372_RS0104470	0.191497	0.348612	-0.155897	0.119355	4.94667	0.0147219	0.00726055	0.00202798	0.0141077	0.0141077	flagellar hook-basal body complex protein FliE	137	140	157	142	107	166
G372_RS0103870	0.192342	0.349841	0.320102	0.245537	4.40651	0.103085	0.014485	0.0759474	0.0181228	0.0759474	HAD family hydrolase	132	74	124	75	67	48
G372_RS0107815	0.192432	0.349841	0.284429	0.218218	3.81439	0.0814128	0.0242846	0.047144	0.0240454	0.047144	cation:proton antiporter	65	59	50	48	21	42
G372_RS0101460	0.193541	0.35162	0.214482	0.164964	5.66772	0.0464566	0.00342495	0.0373948	0.010673	0.0373948	pyridoxine 5'-phosphate synthase	426	329	328	224	155	364
G372_RS0105270	0.194346	0.352844	-0.619117	0.477041	4.45326	0.388073	0.0134853	0.327867	0.0177328	0.327867	hypothetical protein	89	79	48	71	55	293
G372_RS0101295	0.195187	0.353891	0.124495	0.0961066	6.57071	0.0157335	0.00146519	0.0123895	0.00966295	0.0123895	hypothetical protein	932	812	799	645	440	768
G372_RS0101745	0.195068	0.353891	0.111356	0.085941	6.50135	0.00813642	0.00143631	0.00408411	0.00964248	0.00964248	S-methyl-5-thioribose-1-phosphate isomerase	836	628	917	591	478	639
G372_RS0103265	0.197072	0.357069	-0.163946	0.127096	5.03267	0.0274475	0.00674294	0.0174871	0.0135148	0.0174871	hypothetical protein	153	134	188	164	141	143
G372_RS0106095	0.197545	0.357684	0.133627	0.103701	5.38214	0.0116749	0.00457472	0.0033229	0.0115561	0.0115561	redox-regulated ATPase YchF	284	247	246	191	142	223
G372_RS0106275	0.197928	0.358137	-0.167621	0.130193	5.90752	0.0287694	0.00270199	0.0227235	0.0101764	0.0227235	DUF2384 domain-containing protein	425.209	291	430.123	385.365	351	341
G372_RS0111395	0.198101	0.358207	-0.251672	0.195552	3.60312	0.0523558	0.0305123	0.0111805	0.0268485	0.0268485	hypothetical protein	36	27	46	29	31	56
G372_RS0102810	0.198571	0.358817	-0.123243	0.0958618	5.69638	0.00671245	0.00318586	-0.000491118	0.0105984	0.0105984	BCCT family transporter	336	268	335	272	228	369
G372_RS0102185	0.199551	0.360345	-0.353651	0.27568	4.44937	0.12872	0.0118102	0.102189	0.0177649	0.102189	(2E,6E)-farnesyl diphosphate synthase	96	88	59	66	71	162
G372_RS0101935	0.199713	0.360395	-0.147275	0.114846	5.40333	0.0223346	0.00456572	0.0152188	0.0114752	0.0152188	thioredoxin family protein	235	212	242	226	146	298
G372_RS0104705	0.200873	0.362246	0.110736	0.0865757	6.43212	0.0052836	0.00159717	0.000408888	0.00964586	0.00964586	carbonate dehydratase	738	652	812	511	446	644
G372_RS0109010	0.201062	0.362342	-1.19673	0.936016	5.22816	1.481	0.0121679	1.30202	0.0122772	1.30202	tRNA-His	326	232	19	302	179	520
G372_RS0104185	0.201305	0.362537	0.345671	0.270511	3.29314	0.123658	0.0436096	0.0661551	0.0318287	0.0661551	glycosyl transferase family 2	45	30	32	27	10	29
G372_RS0101445	0.201925	0.363411	0.111866	0.0876632	6.28159	0.0107837	0.00180424	0.00698262	0.00972303	0.00972303	ribonuclease III	680	508	721	496	390	482
G372_RS0105890	0.202777	0.364699	-0.152044	0.119374	5.96507	0.0240353	0.00246836	0.0189067	0.0100919	0.0189067	hypothetical protein	441	422	348	357	310	484
G372_RS0101655	0.202942	0.364752	-0.205256	0.161211	4.35658	0.0438259	0.0129355	0.0260481	0.018548	0.0260481	SPOR domain-containing protein	78	65	93	95	70	69
G372_RS0103440	0.203196	0.364965	0.117972	0.0927088	7.83982	0.00786973	0.000428158	0.00419	0.0124642	0.0124642	twitching motility protein PilT	3502	2345	3288	2151	1800	2564
G372_RS0100710	0.20415	0.366189	0.696778	0.548723	7.62834	0.506966	0.000653657	0.450992	0.0117828	0.450992	6-phosphofructokinase	4264	2431	3291	577	882	4338
G372_RS0105110	0.204123	0.366189	0.173006	0.136237	4.55481	0.0244783	0.0109267	0.00844711	0.0169139	0.0169139	molybdate ABC transporter substrate-binding protein	113	111	121	84	54	104
G372_RS0106290	0.204707	0.366943	-0.134422	0.10599	5.43557	0.00835579	0.00549228	-0.00182356	0.0113585	0.0113585	TonB-dependent receptor	259	210	249	198	191	281
G372_RS0112210	0.204896	0.367036	0.127635	0.10068	5.55261	0.00726219	0.00421735	-0.00124861	0.0109874	0.0109874	arylesterase	345.391	261.42	316.188	201.166	196	258.428
G372_RS0101185	0.205572	0.368003	-0.119375	0.0943052	5.83362	0.00986005	0.00304029	0.00394089	0.0102999	0.0102999	DUF4124 domain-containing protein	415	281	393	314	299	366
G372_RS0105895	0.20587	0.368225	0.112249	0.0887343	6.26044	0.0098408	0.00207023	0.00550581	0.00974043	0.00974043	glycosyltransferase	652	589	609	478	378	484
G372_RS0106380	0.20597	0.368225	0.191189	0.151171	4.24097	0.0299926	0.0147121	0.00907119	0.0195668	0.0195668	hypothetical protein	79	69	111	54	54	61
G372_RS13995	0.207389	0.370514	0.21012	0.166659	4.03422	0.0465755	0.018322	0.0233409	0.0215593	0.0233409	DUF3096 domain-containing protein	57	79	74	43	43	50
G372_RS0101840	0.207823	0.371044	-0.107698	0.0855038	6.76608	0.00605321	0.00114674	0.00207018	0.00981961	0.00981961	chemotaxis protein CheW	992	778	994	881	691	912
G372_RS0105715	0.208611	0.372202	0.135374	0.107662	5.30038	0.0107532	0.00548098	0.00108828	0.0119056	0.0119056	glycolate oxidase subunit GlcE	255	198	268	166	157	181
G372_RS13975	0.208961	0.372579	0.268494	0.213696	3.3505	0.028954	0.0376781	-0.028519	0.030821	0.030821	hypothetical protein	38	28	43	23	17	27
G372_RS0105255	0.209219	0.372793	-0.197057	0.156928	4.19504	0.0412009	0.0148663	0.0220732	0.0199844	0.0220732	septum formation inhibitor Maf	61	50	96	60	58	80
G372_RS0105345	0.209604	0.373232	0.144944	0.115525	7.39536	0.0223178	0.000622703	0.0193963	0.0111097	0.0193963	MinD/ParA family protein	2382.22	1426	2181	1527.5	1150.03	1430
G372_RS0102765	0.209943	0.373588	0.110248	0.0879365	7.27997	0.00476345	0.000793907	0.000602433	0.0108053	0.0108053	2-oxoglutarate dehydrogenase E1 component	1925	1416	1825	1191	1072	1466
G372_RS0101020	0.210143	0.373696	0.159206	0.127042	4.76473	0.0160629	0.00886304	0.00171067	0.0153465	0.0153465	hypothetical protein	158	115	154	112	75	108
G372_RS0104495	0.210446	0.373988	-0.325098	0.259593	4.41157	0.112573	0.0132543	0.0878282	0.0180801	0.0878282	CBS domain-containing protein	64	62	117	67	65	149
G372_RS0102825	0.211285	0.374982	-0.192742	0.154189	4.16927	0.0255897	0.0154372	0.00261889	0.020224	0.020224	hypothetical protein	67	59	69	51	57	88
G372_RS0107720	0.211231	0.374982	-0.243204	0.194534	4.46766	0.0631569	0.0141411	0.0426243	0.0176143	0.0426243	ABC transporter	111	79	71	73	66	141
G372_RS0108550	0.211497	0.375111	-0.121087	0.0969114	5.67745	0.00767189	0.00344013	0.000651483	0.0106476	0.0106476	hypothetical protein	337	251	338	254	251	338
G372_RS0104510	0.213281	0.378024	-0.317035	0.25473	3.86678	0.108018	0.0248379	0.0724929	0.0234153	0.0724929	trehalose-phosphatase	57	33	48	31	48	83
G372_RS0101280	0.213635	0.378404	-0.137862	0.110854	5.17453	0.0106873	0.00584385	0.000388076	0.0125891	0.0125891	hypothetical protein	214	145	198	182	138	194
G372_RS0106160	0.214032	0.378606	0.168222	0.135384	5.19196	0.0304841	0.00560233	0.0218908	0.0124848	0.0218908	peptidase S16	234	163	269	144	151	149
G372_RS0110890	0.214019	0.378606	0.194029	0.156149	4.13345	0.0374574	0.0160087	0.0166954	0.0205649	0.0205649	hypothetical protein	84	63	83	54	32	74
G372_RS0106790	0.214367	0.378951	-0.196992	0.158654	4.03492	0.0195692	0.0162045	-0.00629523	0.0215521	0.0215521	molybdopterin-guanine dinucleotide biosynthesis protein B	61	51	58	47	50	73
G372_RS0101325	0.215088	0.379974	0.115613	0.0932588	6.47528	0.0144465	0.00167456	0.0113712	0.0096411	0.0113712	dTDP-4-dehydrorhamnose reductase	733	686	891	597	484	574
G372_RS0104490	0.215756	0.380655	0.109005	0.0880569	7.37478	0.00756433	0.000576967	0.00442266	0.0110541	0.0110541	phosphoribosylformylglycinamidine synthase	2186	1505	2006	1388	1190	1509
G372_RS0105455	0.21568	0.380655	-0.115262	0.0930959	5.91581	0.007936	0.00283654	0.00210149	0.0101637	0.0101637	PIN domain-containing protein	406	347	419	383	298	383
G372_RS0101415	0.215921	0.380695	0.213636	0.172642	4.82253	0.0494583	0.00748782	0.0372201	0.0149453	0.0372201	positive regulator of sigma E, RseC/MucC	179	127	159	86	118	98
G372_RS0111780	0.216291	0.381098	-0.323491	0.261629	7.55309	0.113533	0.000542034	0.102132	0.0115567	0.102132	oxygen-independent coproporphyrinogen III oxidase	1392	1496	2828	2456	1867	1776
G372_RS13715	0.216955	0.381873	0.312263	0.252913	5.77727	0.10601	0.0058806	0.0900667	0.0104097	0.0900667	glyoxalase/bleomycin resistance/dioxygenase family protein	623.678	250.181	474.157	196.243	278.956	277.029
G372_RS0101275	0.217287	0.381873	-0.16934	0.137253	4.55963	0.0110018	0.0113818	-0.00838305	0.016876	0.016876	hypothetical protein	102	85	106	99	73	111
G372_RS0106630	0.217299	0.381873	-0.117515	0.095251	5.74674	0.00772775	0.00313302	0.001348	0.0104761	0.0104761	magnesium and cobalt transport protein CorA	362	265	369	276	251	381
G372_RS0107490	0.217261	0.381873	-0.145767	0.118141	9.24843	0.0231232	9.47672e-05	0.0208411	0.0189296	0.0208411	glycine cleavage system protein GcvH	9897	11522	10914	9149	9126	12091
G372_RS0101350	0.217746	0.382408	-0.106721	0.0865857	7.15197	0.0109763	0.000755265	0.00869414	0.0104904	0.0104904	lipoyl synthase	1539	1064	1494	1216	909	1597
G372_RS0107305	0.2182	0.382736	0.156378	0.126999	4.8173	0.0243778	0.00921228	0.0120896	0.014981	0.014981	16S rRNA (adenine(1518)-N(6)/adenine(1519)-N(6))-dimethyltransferase RsmA	174	111	169	115	91	102
G372_RS0111625	0.218218	0.382736	0.215878	0.175328	3.92739	0.0177998	0.0233935	-0.01862	0.0227164	0.0227164	hypothetical protein	69	49	72	39	34	50
G372_RS0106865	0.218873	0.383634	-0.133506	0.108583	5.29108	0.0113104	0.00573525	0.00171883	0.01195	0.01195	histidine kinase	198	192	231	193	149	239
G372_RS0103505	0.219174	0.383912	0.129118	0.105082	7.50241	0.0182522	0.000571315	0.0159922	0.0114092	0.0159922	response regulator	2705	1665	2215	1387	1223	2091
G372_RS0102530	0.219414	0.384081	-0.267105	0.217497	5.78708	0.0781694	0.00311537	0.0678419	0.0103894	0.0678419	copper resistance protein CopC	281	295	385	450	296	280
G372_RS0105955	0.220296	0.385375	0.128462	0.104803	5.38231	0.0170562	0.0049202	0.0102117	0.0115554	0.0115554	hypothetical protein	272	247	255	152	170	236
G372_RS0112030	0.220453	0.385398	-0.18569	0.151543	6.16484	0.0379025	0.00207708	0.0323709	0.00983559	0.0323709	cobalamin-binding protein	596	444	424	457	326	689
G372_RS0109485	0.220834	0.385813	-0.111289	0.0908989	6.07667	0.0086367	0.00245077	0.00370065	0.00994314	0.00994314	dihydroxy-acid dehydratase	527	383	477	449	351	447
G372_RS0103295	0.221195	0.386194	0.299628	0.244923	5.98692	0.0989179	0.00280202	0.087179	0.0100616	0.087179	DUF3429 domain-containing protein	680	296	677	388	251	298
G372_RS0104000	0.22151	0.38624	-0.218044	0.178356	4.95821	0.052436	0.00722686	0.0404894	0.0140282	0.0404894	inositol monophosphatase family protein	160	157	113	132	107	203
G372_RS0107430	0.2215	0.38624	-0.129246	0.105719	7.32152	0.0184231	0.000637021	0.0161277	0.0109128	0.0161277	peptidase M48	1614	1513	1611	1611	1311	1438
G372_RS0110065	0.221682	0.38629	-0.207357	0.169677	3.90022	0.0351916	0.0201598	0.00770581	0.0230258	0.0230258	HprK-related kinase A	61	45	43	46	36	70
G372_RS0105460	0.222417	0.38732	0.118433	0.0970664	5.71444	0.0120591	0.00358026	0.00623367	0.0105526	0.0105526	type II toxin-antitoxin system Phd/YefM family antitoxin	409	311	360	272	234	264
G372_RS0105105	0.22306	0.388187	0.20135	0.165253	4.05954	0.0247112	0.0196644	-0.00397852	0.0212985	0.0212985	molybdate ABC transporter permease subunit	80	60	74	43	48	49
G372_RS0107590	0.223405	0.388537	0.177075	0.145439	4.33307	0.024607	0.0129774	0.006023	0.0187514	0.0187514	glycosyltransferase	97	96	84	69	49	71
G372_RS0107035	0.224352	0.389931	0.117787	0.0969408	5.67988	0.0129152	0.00345501	0.00748639	0.0106413	0.0106413	multi-copper polyphenol oxidoreductase	393	261	402	239	229	277
G372_RS0108435	0.22525	0.391239	0.104733	0.0863647	7.01904	0.00700573	0.000980807	0.00366296	0.0102075	0.0102075	imidazoleglycerol-phosphate dehydratase HisB	1346	1128	1485	1011	814	1048
G372_RS0104110	0.225886	0.39209	-0.340227	0.280942	6.35723	0.12944	0.00176446	0.116628	0.00967333	0.116628	ribulose-phosphate 3-epimerase	642	550	449	483	394	1212
G372_RS0111905	0.226116	0.392235	-0.127565	0.105388	6.61363	0.0182099	0.00126927	0.0153908	0.00968619	0.0153908	acyl-ACP--UDP-N-acetylglucosamine O-acyltransferase	803	762	770	649	550	1014
G372_RS0103210	0.226889	0.393322	-0.104673	0.0866203	7.10598	0.00613827	0.000868101	0.00269607	0.0103865	0.0103865	DNA translocase FtsK	1412	1153	1313	1222	987	1271
G372_RS0101520	0.227497	0.393789	-0.106364	0.0881347	6.23263	0.00933512	0.00188616	0.00554026	0.00976544	0.00976544	hypothetical protein	628	480	514	505	373	593
G372_RS0101925	0.227625	0.393789	0.145816	0.120858	5.71672	0.0239068	0.00339509	0.018515	0.010547	0.018515	outer membrane protein assembly factor	390	294	419	300	220	246
G372_RS0102690	0.227843	0.393789	0.335269	0.278016	2.78884	0.0540496	0.0732217	-0.0478118	0.0427179	0.0427179	BrnT family toxin	21	16	27	11	9	17
G372_RS0103665	0.228396	0.393789	-0.270124	0.224262	5.24844	0.0822422	0.00573472	0.0697054	0.0121669	0.0697054	threonylcarbamoyl-AMP synthase	192	183	179	139	153	349
G372_RS0107340	0.228105	0.393789	0.106907	0.0887005	6.16103	0.0101155	0.00196178	0.00639669	0.00983989	0.00983989	rod shape-determining protein RodA	530	544	597	408	350	458
G372_RS0107660	0.228441	0.393789	-0.124101	0.103041	5.41974	0.00974901	0.0045114	0.00189943	0.0114149	0.0114149	DUF1007 domain-containing protein	264	216	230	235	174	244
G372_RS0109790	0.228477	0.393789	-0.106458	0.0883988	6.2196	0.00739442	0.00194357	0.00304946	0.00977795	0.00977795	DNA-protecting protein DprA	567	453	580	429	444	564
G372_RS0110635	0.228097	0.393789	0.199758	0.165736	5.99678	0.0449332	0.00254109	0.0386617	0.0100482	0.0386617	tryptophan synthase subunit alpha	520	446	521	409	299	284
G372_RS0111835	0.227622	0.393789	-0.103786	0.0860221	6.69005	0.00557226	0.0013564	0.00156958	0.00974329	0.00974329	protein-PII] uridylyltransferase	894	797	862	723	667	911
G372_RS0107595	0.230376	0.396623	-0.315342	0.262919	3.73091	0.112784	0.0259841	0.0777052	0.0251011	0.0777052	hypothetical protein	33	49	37	33	33	75
G372_RS0109135	0.230416	0.396623	0.180332	0.150366	4.88088	0.036888	0.00825302	0.025662	0.0145534	0.025662	tRNA (adenosine(37)-N6)-threonylcarbamoyltransferase complex dimerization subunit type 1 TsaB	169	137	177	117	111	96
G372_RS0103215	0.230685	0.396831	0.187942	0.156802	5.21963	0.0401009	0.00616695	0.0307133	0.012325	0.0307133	outer membrane lipoprotein carrier protein LolA	264	190	229	141	101	240
G372_RS0103770	0.231441	0.397877	-0.277227	0.231668	3.12441	0.0545692	0.0454596	-0.00606875	0.0350458	0.0350458	hypothetical protein	20	16	31	20	21	29
G372_RS0111365	0.231758	0.398168	0.242696	0.20295	4.38112	0.0670966	0.014107	0.0476757	0.0183379	0.0476757	hypothetical protein	96	104	100	73	37	93
G372_RS0103490	0.232105	0.398509	0.103801	0.0868659	6.45767	0.00651195	0.00167652	0.00242296	0.009642	0.009642	FAD:protein FMN transferase	811	618	833	583	454	605
G372_RS0109110	0.232319	0.398622	-0.114444	0.0958167	5.76152	0.0122373	0.00332798	0.00705712	0.0104433	0.0104433	hypothetical protein	342	316	344	302	224	406
G372_RS0103380	0.233342	0.40012	-0.154531	0.129662	7.39718	0.0273386	0.0006233	0.0245951	0.0111147	0.0245951	acetolactate synthase, large subunit, biosynthetic type	1871	1713	1483	1553	1165	2188
G372_RS0105485	0.235876	0.403951	-0.120417	0.101587	5.44745	0.00864214	0.00416254	0.00120254	0.0113174	0.0113174	cytochrome c	278	203	254	230	197	238
G372_RS0111695	0.235852	0.403951	-0.150155	0.126668	5.55167	0.0260177	0.00403422	0.020033	0.0109901	0.020033	YggT family protein	279	271	248	260	175	339
G372_RS0112965	0.236329	0.404469	0.152176	0.128504	4.7573	0.00810444	0.00937068	-0.00792416	0.0153991	0.0153991	monofunctional biosynthetic peptidoglycan transglycosylase	146	122	152	95	78	121
G372_RS0106285	0.23652	0.404537	-0.114061	0.0963575	5.68244	0.00479064	0.00329253	-0.00218297	0.0106346	0.0106346	exo-alpha-sialidase	335	256	342	271	237	337
G372_RS0100855	0.23717	0.405392	-0.232035	0.196293	6.47147	0.062389	0.00141598	0.0563802	0.00964117	0.0563802	30S ribosomal protein S11	565	639	728	497	523	1063
G372_RS0106885	0.238252	0.406982	0.155599	0.131935	4.60568	0.0122325	0.00959169	-0.00338023	0.0165185	0.0165185	ribosome silencing factor	127	115	118	88	69	93
G372_RS0100005	0.239475	0.408551	-0.237413	0.20183	4.49996	0.0657919	0.00989516	0.0512079	0.0173514	0.0512079	hypothetical protein	121.78	68.6927	82.775	67.4695	76.8125	143.224
G372_RS0105760	0.239336	0.408551	-0.218808	0.185959	3.6227	0.0401679	0.025301	0.00695501	0.0265699	0.0265699	dihydrofolate reductase	40	32	39	44	35	33
G372_RS0100170	0.24011	0.409375	-0.235429	0.200414	3.50939	0.0349631	0.0320109	-0.00909217	0.0282379	0.0282379	polysaccharide deacetylase	35	24	41	35	24	44
G372_RS0111235	0.240291	0.409424	-0.181825	0.154842	4.19201	0.0220562	0.0159518	-0.000779198	0.0200123	0.0200123	glycosyltransferase, exosortase A system-associated	75	66	60	58	56	83
G372_RS0111815	0.240743	0.409934	0.100853	0.0859689	6.72546	0.0114514	0.00130953	0.00919047	0.00977645	0.00977645	PAS domain S-box protein	1174	857	923	639	608	925
G372_RS0108735	0.241045	0.410188	0.167476	0.142851	4.39518	0.0119139	0.0123913	-0.00801706	0.0182185	0.0182185	DUF2069 domain-containing protein	106	82	107	63	53	88
G372_RS0113240	0.241359	0.410463	0.107309	0.0915922	5.94524	0.00613946	0.00246358	0.000892529	0.0101201	0.0101201	anion transporter	463	402	484	296	288	401
G372_RS0100735	0.241678	0.410746	0.261644	0.223474	3.28987	0.080466	0.0406805	0.0342304	0.0318874	0.0342304	biopolymer transporter ExbD	41	27	34	24	23	16
G372_RS0109675	0.241872	0.410816	-0.16049	0.137133	4.6017	0.0125268	0.0116594	-0.0056598	0.016549	0.016549	thioredoxin	109	89	109	104	72	120
G372_RS0112110	0.242039	0.41084	-0.10343	0.0884087	6.18243	0.0111666	0.00190794	0.00803865	0.00981622	0.00981622	flagella export chaperone FliS	550	409	595	485	410	481
G372_RS0101465	0.242472	0.41101	0.315234	0.2697	3.9054	0.117098	0.0235488	0.0855584	0.0229664	0.0855584	holo-ACP synthase	73	49	74	22	39	62
G372_RS13770	0.242599	0.41101	0.268404	0.229697	3.19809	0.0614511	0.0455478	0.00425072	0.033593	0.033593	glyoxalase/bleomycin resistance/dioxygenase family protein	36.6006	22.5979	34.7382	15.1025	14.0188	31.1975
G372_RS0107745	0.242498	0.41101	-0.113196	0.0968507	5.66478	0.0073861	0.00338937	0.00103827	0.0106807	0.0106807	membrane-bound lytic murein transglycosylase MltF	356	267	293	274	224	334
G372_RS0111200	0.244167	0.413408	-0.256538	0.220274	3.43051	0.0779682	0.0366974	0.0360835	0.029483	0.0360835	hypothetical protein	29	21	43	24	25	50
G372_RS0100505	0.244608	0.413633	-0.142705	0.122646	4.81758	0.0210613	0.0075841	0.0111058	0.0149791	0.0149791	hypothetical protein	140	107	139	145	85	136
G372_RS0108235	0.244538	0.413633	0.26265	0.225699	3.2791	0.0444879	0.0443284	-0.014588	0.0320818	0.0320818	cbb3-type cytochrome oxidase assembly protein CcoS	38	30	32	25	18	19
G372_RS0103650	0.245222	0.414398	0.134428	0.115684	5.44024	0.0214805	0.00412277	0.0159512	0.0113422	0.0159512	segregation/condensation protein A	311	222	298	221	175	186
G372_RS0106180	0.245369	0.414398	0.116636	0.100404	5.57884	0.00682484	0.00420878	-0.000779239	0.0109127	0.0109127	KpsF/GutQ family sugar-phosphate isomerase	348	272	321	239	175	268
G372_RS13710	0.245802	0.414868	-0.500004	0.430813	1.94856	0.297721	0.153366	0.125034	0.0720661	0.125034	glyoxalase/bleomycin resistance/dioxygenase family protein	6.0081	9.01841	3	5	11	8.0136
G372_RS0105275	0.246005	0.414949	-0.279831	0.241211	6.2206	0.0933111	0.00219146	0.0850829	0.00977697	0.0850829	50S ribosomal protein L32	569	506	400	396	382	924
G372_RS0111580	0.246216	0.415046	0.110867	0.0956091	5.68324	0.00831052	0.00307914	0.00269967	0.0106325	0.0106325	hypothetical protein	371	323	344	249	193	322
G372_RS14040	0.246432	0.41515	0.363108	0.313279	2.76044	0.157327	0.0916919	0.0555234	0.0434547	0.0555234	glyoxalase/bleomycin resistance/dioxygenase family protein	26.177	27.1443	12.1232	9.72632	8.89118	17.0474
G372_RS0102345	0.246945	0.4155	-0.104047	0.0898656	6.09314	0.00486804	0.00219187	-0.000166446	0.00992188	0.00992188	prepilin peptidase	497	398	517	404	376	482
G372_RS0107735	0.246949	0.4155	0.1075	0.0928495	5.93879	0.00645347	0.00280206	0.000931157	0.0101295	0.0101295	NAD(P)-dependent oxidoreductase	499	369	480	293	286	400
G372_RS0102335	0.24737	0.415948	-0.10681	0.0923351	7.8218	0.00593198	0.000385194	0.00275167	0.0124035	0.0124035	type IV-A pilus assembly ATPase PilB	2836	2251	2860	2280	1877	3079
G372_RS14120	0.247755	0.416334	0.172193	0.14898	4.48779	0.0212691	0.0158423	-0.000374845	0.01745	0.01745	hypothetical protein	139.626	80.9626	109.547	73.2395	64.3451	81.8837
G372_RS0109575	0.24957	0.419121	-0.119446	0.10374	5.288	0.00788231	0.00417798	0.000324695	0.0119649	0.0119649	SDR family oxidoreductase	219	187	217	186	174	206
G372_RS0106280	0.25005	0.419666	-0.116791	0.101537	5.53033	0.0164638	0.00408786	0.0113769	0.0110529	0.0113769	DUF2384 domain-containing protein	282	203	323	270	196	260
G372_RS0105490	0.250374	0.419947	-0.123854	0.107752	5.23562	0.0171671	0.00517959	0.0105268	0.0122361	0.0122361	4a-hydroxytetrahydrobiopterin dehydratase	197	174	220	214	141	190
G372_RS0107075	0.251208	0.421083	0.179615	0.156539	5.03211	0.0390837	0.00715794	0.0295985	0.0135186	0.0295985	glycerol-3-phosphate dehydrogenase	183	205	172	113	130	134
G372_RS0106700	0.251383	0.421113	0.128012	0.111607	5.14018	0.0174962	0.0058821	0.00984295	0.0128019	0.0128019	peptidase M48 Ste24p	255	146	222	136	121	179
G372_RS13685	0.252569	0.42243	-0.21526	0.188143	4.8998	0.0563785	0.00818047	0.0449162	0.014427	0.0449162	glyoxalase/bleomycin resistance/dioxygenase family protein	188.161	94.9652	133.794	127.156	143.717	131.039
G372_RS0105145	0.25272	0.42243	0.206828	0.18083	5.62091	0.0520729	0.00428993	0.0447595	0.0107972	0.0447595	CinA family protein	388	265	384	260	226	189
G372_RS0110855	0.25255	0.42243	-0.100462	0.0878031	6.29957	0.0110453	0.00185471	0.00816712	0.00970938	0.00970938	hypothetical protein	642	458	650	554	455	537
G372_RS0105175	0.252797	0.42243	-0.757646	0.66252	3.95078	0.698928	0.0287377	0.629662	0.0224551	0.629662	tRNA-Ser	41	58	25	48	25	257
G372_RS13655	0.254214	0.424532	-0.160914	0.141131	4.44815	0.0115825	0.0121018	-0.00733367	0.017775	0.017775	RtT sRNA	90	83	89	77	70	105
G372_RS0104560	0.2548	0.425247	-0.192177	0.168759	3.90059	0.028833	0.0196975	0.00249428	0.0230216	0.0230216	hypothetical protein	59	41	50	45	35	72
G372_RS0104940	0.256348	0.427299	-0.213295	0.187915	3.64982	0.0527684	0.026777	0.0221229	0.0261908	0.0261908	hypothetical protein	46	36	33	40	24	57
G372_RS0109015	0.256329	0.427299	-0.425636	0.374973	3.03667	0.223076	0.0549807	0.155927	0.0368787	0.155927	tRNA-Lys	22	21	13	22	11	48
G372_RS0108790	0.257948	0.429699	0.119291	0.10545	6.59022	0.0176127	0.00144525	0.0152342	0.00967272	0.0152342	tol-pal system protein YbgF	970	794	826	576	459	881
G372_RS0105035	0.259689	0.432065	-0.16291	0.144536	4.37659	0.0174352	0.0129595	-0.00111785	0.0183765	0.0183765	hypothetical protein	89	75	80	66	66	105
G372_RS0110555	0.259617	0.432065	0.102188	0.0906488	6.07603	0.0106238	0.00238183	0.00698204	0.00994397	0.00994397	tRNA adenosine(34) deaminase TadA	523	409	619	396	312	413
G372_RS0109820	0.259919	0.43218	0.156698	0.139092	4.62659	0.0305821	0.0117628	0.0172569	0.0163588	0.0172569	shikimate dehydrogenase	128	108	133	104	74	78
G372_RS0104570	0.260485	0.432853	-0.156811	0.139357	5.39988	0.0306814	0.00497243	0.0241582	0.0114881	0.0241582	hypothetical protein	258	194	235	209	144	328
G372_RS0109180	0.261166	0.433716	0.103718	0.0923053	7.79882	0.00888662	0.000453662	0.00662059	0.0123268	0.0123268	RNA polymerase sigma factor RpoS	3338	2421	2892	1987	1627	2774
G372_RS0106725	0.261648	0.434249	0.11636	0.103661	5.41609	0.00846128	0.00469035	0.000808883	0.0114281	0.0114281	hypothetical protein	261	253	282	188	153	239
G372_RS0104695	0.26208	0.434697	0.141018	0.125742	4.766	0.0101184	0.00837889	-0.00318823	0.0153376	0.0153376	cytochrome c	155	116	152	90	80	130
G372_RS0106660	0.262577	0.434984	0.271751	0.242565	3.00353	0.0631487	0.0506553	0.000587385	0.0376013	0.0376013	hypothetical protein	26	18	34	19	10	19
G372_RS0108155	0.262433	0.434984	-0.100382	0.0895743	6.06582	0.00604399	0.0020781	0.00169817	0.00995723	0.00995723	hypothetical protein	537	381	463	409	355	462
G372_RS0100270	0.263358	0.436009	-0.0960007	0.0858306	6.91919	0.00726743	0.00102002	0.00460822	0.0100303	0.0100303	prepilin-type cleavage/methylation domain-containing protein	1155	859	1246	887	858	1135
G372_RS13865	0.264551	0.436774	0.255036	0.228589	3.80523	0.0822163	0.0243587	0.0540204	0.024158	0.0540204	glyoxalase/bleomycin resistance/dioxygenase family protein	89.8997	35.9617	55.129	31.9407	26.1641	51.573
G372_RS0107585	0.264122	0.436774	0.128482	0.115055	5.05012	0.0079854	0.00646092	-0.00266957	0.0133957	0.0133957	glycosyl transferase	196	157	205	129	120	145
G372_RS0108695	0.264633	0.436774	-0.0980799	0.087924	6.24322	0.00601361	0.0018403	0.00206933	0.00975564	0.00975564	threonine ammonia-lyase, biosynthetic	564	490	586	443	410	627
G372_RS0110825	0.264316	0.436774	0.154221	0.13816	4.46242	0.0245087	0.0109749	0.010742	0.0176573	0.0176573	DUF1722 domain-containing protein	102	89	123	72	50	102
G372_RS13610	0.264622	0.436774	-0.427159	0.382918	3.84865	0.230691	0.0231	0.19684	0.0236306	0.19684	hypothetical protein	35	48	43	27	46	111
G372_RS0102265	0.265208	0.437455	-0.103332	0.092744	5.85463	0.00522113	0.00263944	-0.000117104	0.0102627	0.0102627	anhydro-N-acetylmuramic acid kinase	420	328	363	334	275	389
G372_RS0112330	0.265499	0.437666	-0.106596	0.095732	5.78273	0.011033	0.00334859	0.00618164	0.0103983	0.0103983	LemA family protein	352	340	335	294	246	400
G372_RS0105210	0.265846	0.437702	0.219802	0.197543	3.53203	0.0333479	0.0306412	-0.00707369	0.0278936	0.0278936	hypothetical protein	41	45	40	30	20	33
G372_RS0109050	0.265846	0.437702	-0.154488	0.138844	4.43343	0.0139077	0.0110191	-0.00258442	0.0178972	0.0178972	Vi polysaccharide biosynthesis UDP-N-acetylglucosamine C-6 dehydrogenase TviB	91	84	84	74	69	105
G372_RS0107385	0.266303	0.438186	-0.203365	0.182945	3.70438	0.0226935	0.0247528	-0.0118949	0.0254506	0.0254506	polysaccharide export protein Wza	48	35	39	34	36	52
G372_RS0107580	0.266655	0.438495	0.114108	0.102726	5.44286	0.00457112	0.00449569	-0.00366449	0.0113331	0.0113331	TVP38/TMEM64 family protein	304	238	278	197	165	230
G372_RS0110665	0.266845	0.438539	0.138142	0.124412	6.79885	0.0242991	0.00124889	0.0219687	0.00985838	0.0219687	aspartate-semialdehyde dehydrogenase	1148	849	1256	864	679	722
G372_RS0104405	0.269165	0.441681	0.19022	0.172147	4.80348	0.0464168	0.0087077	0.0357443	0.0150761	0.0357443	flagellar biosynthetic protein FliR	124	165	161	84	99	117
G372_RS0104775	0.269397	0.441681	0.392661	0.355526	8.2848	0.197933	0.00026339	0.189334	0.0141301	0.189334	AcrB/AcrD/AcrF family protein	6721	3440	6702	5459	1956	2340
G372_RS0110005	0.269129	0.441681	0.229708	0.207867	3.61806	0.0676801	0.0277788	0.0370342	0.0266356	0.0370342	hypothetical protein	56	28	62	36	22	32
G372_RS0112815	0.269414	0.441681	-0.337195	0.305316	3.16421	0.145971	0.0462708	0.0935558	0.0342516	0.0935558	hypothetical protein	17	30	20	19	18	44
G372_RS0100680	0.27004	0.442387	0.0996106	0.0903112	6.07552	0.00512302	0.00228954	0.000393395	0.00994463	0.00994463	DUF4124 domain-containing protein	525	434	578	352	328	443
G372_RS0108265	0.270174	0.442387	-0.172763	0.156679	8.30149	0.038412	0.000257271	0.036565	0.014199	0.036565	cytochrome-c oxidase, cbb3-type subunit II	3640	3999	4792	4272	3864	3717
G372_RS0101530	0.271261	0.443897	0.0954433	0.0867538	6.44102	0.00594536	0.00164514	0.00237053	0.00964418	0.00964418	replicative DNA helicase	803	685	713	532	436	665
G372_RS0112960	0.271485	0.443993	-0.0998062	0.0907618	6.0417	0.012685	0.00236791	0.0097528	0.00998864	0.00998864	mechanosensitive ion channel protein MscS	530	417	399	386	323	500
G372_RS13680	0.272464	0.444782	0.202709	0.184716	5.02433	0.0532714	0.00700831	0.0441718	0.013572	0.0441718	glyoxalase/bleomycin resistance/dioxygenase family protein	236.359	176.819	156.153	111.729	86.1579	192.91
G372_RS0112440	0.272441	0.444782	0.14849	0.135303	4.65274	0.01281	0.011299	-0.00355496	0.0161615	0.0161615	error-prone DNA polymerase	142	101	137	92	65	110
G372_RS0112795	0.272464	0.444782	-0.143827	0.131061	4.66838	0.0121685	0.00972064	-0.00226729	0.0160447	0.0160447	hypothetical protein	133	89	112	94	87	131
G372_RS0108955	0.272953	0.445259	0.111204	0.101437	5.49198	0.0140371	0.00426349	0.00864554	0.0111707	0.0111707	3-deoxy-manno-octulosonate cytidylyltransferase	280	246	337	233	155	241
G372_RS0111540	0.273088	0.445259	0.201197	0.183577	3.72105	0.046104	0.0253207	0.0171293	0.0252302	0.0252302	tRNA-Thr	49	50	52	39	32	29
G372_RS0103725	0.273275	0.445294	0.22075	0.201497	3.53868	0.0434912	0.0331078	0.00298224	0.0277935	0.0277935	hypothetical protein	46	40	41	21	30	32
G372_RS0102170	0.273827	0.445923	0.0940504	0.0859464	7.00144	0.00406655	0.00090614	0.000859999	0.010174	0.010174	Fe-S oxidoreductase	1389	1135	1335	933	750	1188
G372_RS0101690	0.274283	0.446395	-0.10125	0.0926131	5.91981	0.00761738	0.00270811	0.00296932	0.0101577	0.0101577	ferrochelatase	447	304	449	358	293	413
G372_RS0105610	0.27451	0.446495	-0.158614	0.145153	4.36707	0.0121701	0.0131463	-0.00736807	0.0184579	0.0184579	hypothetical protein	96	64	85	79	65	86
G372_RS0100700	0.275328	0.447013	-0.692584	0.634889	2.33939	0.627602	0.147783	0.456843	0.0562887	0.456843	tRNA (cytidine(34)-2'-O)-methyltransferase	13	15	2	9	12	19
G372_RS0104340	0.275323	0.447013	-0.261564	0.239773	3.77052	0.0895138	0.0236883	0.062548	0.0245921	0.062548	multiple resistance and pH regulation protein F	30	40	61	39	33	66
G372_RS0110595	0.275205	0.447013	0.137615	0.126119	4.80909	0.0212045	0.00882159	0.0105823	0.0150374	0.0150374	DUF3488 domain-containing protein	167	111	167	104	100	103
G372_RS0102245	0.27554	0.447086	-0.372913	0.341998	2.42276	0.0630125	0.122004	-0.0953873	0.0534399	0.0534399	tRNA-Ala	12	8	10	10	9	18
G372_RS0109715	0.276805	0.448868	-0.132382	0.121727	4.84446	0.0125653	0.00742991	0.00170489	0.0147964	0.0147964	dUTP diphosphatase	130	120	147	116	116	133
G372_RS0113285	0.278501	0.451346	0.274133	0.252962	3.01259	0.0464179	0.0585824	-0.0287408	0.0374021	0.0374021	phosphate-binding protein	24	19	36	15	13	19
G372_RS0112295	0.279292	0.452355	0.457634	0.422987	2.00393	0.273756	0.198811	0.0648478	0.0695652	0.0695652	hypothetical protein	9	7	15	2	6	9
G372_RS0113330	0.279945	0.45314	-0.229001	0.211951	6.39064	0.06964	0.00198258	0.065402	0.00965821	0.065402	lytic transglycosylase domain-containing protein	699	393	754	641	640	526
G372_RS0102130	0.280461	0.453291	-0.208338	0.193034	7.21057	0.057736	0.000718562	0.0551746	0.0106313	0.0551746	ribosome maturation factor RimM	1451	1393	1239	1122	965	2264
G372_RS0105480	0.280545	0.453291	-0.11169	0.103503	6.69984	0.016598	0.0012228	0.0148467	0.00975204	0.0148467	oligoribonuclease	971	770	836	752	557	1093
G372_RS0106920	0.280466	0.453291	0.0970539	0.0899253	6.11031	0.00802593	0.0022296	0.00427052	0.00990023	0.00990023	hypothetical protein	612	411	579	394	338	428
G372_RS0107650	0.281008	0.453767	-0.132886	0.123264	6.08796	0.0235304	0.00215994	0.0206311	0.00992853	0.0206311	long-chain fatty acid--CoA ligase	468	348	592	462	372	438
G372_RS0106970	0.281659	0.454489	0.157476	0.146271	4.30011	0.00968329	0.0130531	-0.0102485	0.0190398	0.0190398	NUDIX hydrolase	101	74	92	57	51	77
G372_RS0111380	0.281793	0.454489	0.130802	0.12153	4.89669	0.00807685	0.00770628	-0.00402619	0.0144479	0.0144479	hypothetical protein	183	126	173	111	92	138
G372_RS0107920	0.282099	0.454709	0.112295	0.104401	5.33877	0.0136097	0.0046158	0.0076675	0.0117336	0.0117336	hypothetical protein	273	202	266	158	177	196
G372_RS0105385	0.282493	0.455071	0.299109	0.278309	3.46348	0.119787	0.0404525	0.0757315	0.0289539	0.0757315	sulfate transporter CysZ	42	35	46	14	23	44
G372_RS0110045	0.282696	0.455126	-0.219975	0.204764	3.46732	0.0553922	0.0339994	0.0170951	0.0288932	0.0288932	VanZ family protein	41	21	36	27	24	49
G372_RS0101715	0.283175	0.455351	-0.133811	0.124682	4.84059	0.00864937	0.0084959	-0.00439867	0.0148225	0.0148225	hypothetical protein	139	113	144	110	102	158
G372_RS0106100	0.283081	0.455351	-0.132895	0.123805	6.30759	0.0236916	0.00190603	0.0210856	0.00970365	0.0210856	monothiol glutaredoxin, Grx4 family	636	546	537	622	368	636
G372_RS0110170	0.283405	0.455448	0.158568	0.147821	4.27383	0.0188205	0.0135041	0.000592706	0.0192724	0.0192724	TatD family deoxyribonuclease	102	77	81	52	49	81
G372_RS0100205	0.285363	0.458047	0.141222	0.132187	5.26806	0.0269511	0.00504865	0.0211614	0.0120644	0.0211614	circularly permuted type 2 ATP-grasp protein	305	158	257	154	145	190
G372_RS0109005	0.28533	0.458047	-0.259637	0.243009	5.61337	0.0910876	0.00370318	0.0848771	0.0108175	0.0848771	tRNA-Arg	325	263	224	259	170	497
G372_RS0103275	0.286602	0.45849	0.211293	0.198285	5.22225	0.0605737	0.00580547	0.0531698	0.0123102	0.0531698	class I SAM-dependent methyltransferase	296	135	300	142	137	171
G372_RS0104505	0.28639	0.45849	-0.225742	0.21175	4.49846	0.0690935	0.0112964	0.0559608	0.0173635	0.0559608	hypothetical protein	96	63	116	73	65	153
G372_RS13845	0.286663	0.45849	0.213708	0.200576	3.46481	0.0515543	0.031413	0.0159032	0.0289329	0.0289329	hypothetical protein	37	46	35	21	25	31
G372_RS0106800	0.285991	0.45849	0.118329	0.110904	6.25125	0.0189601	0.00178206	0.0166674	0.00974843	0.0166674	PilZ domain-containing protein	641	486	737	466	413	438
G372_RS0107785	0.28628	0.45849	-0.40601	0.380759	5.54773	0.223426	0.00425857	0.213207	0.0110016	0.213207	3-hydroxyacyl-acyl-carrier-protein] dehydratase FabA	274	263	175	190	179	658
G372_RS0110745	0.286349	0.45849	-0.155014	0.145394	4.3637	0.0226119	0.0132224	0.00603135	0.0184868	0.0184868	deacetylase	77	75	90	63	75	92
G372_RS0108785	0.287921	0.460228	0.0922737	0.08683	6.52244	0.0116017	0.0014265	0.00988268	0.00964607	0.00988268	peptidoglycan-associated lipoprotein Pal	752	754	879	645	467	657
G372_RS0101795	0.289301	0.461063	0.0923334	0.0871352	6.40235	0.00759529	0.00173484	0.00456222	0.00965398	0.00965398	S49 family peptidase	730	634	751	546	462	547
G372_RS13525	0.289261	0.461063	-0.212036	0.200082	3.97553	0.0615272	0.0209486	0.0391007	0.0221835	0.0391007	hypothetical protein	54	44	62	37	45	88
G372_RS0108950	0.288968	0.461063	-0.153935	0.145168	4.91579	0.0323973	0.00788545	0.0237253	0.0143189	0.0237253	hypothetical protein	144	147	130	153	117	128
G372_RS0111295	0.288659	0.461063	-0.206478	0.194595	3.61095	0.0473582	0.0300642	0.0131461	0.0267365	0.0267365	PilZ domain-containing protein	53	25	37	32	35	43
G372_RS0102320	0.288919	0.461063	-0.442107	0.416886	1.98536	0.188564	0.190298	-0.0278898	0.0703937	0.0703937	tRNA-Thr	7	5	6	4	7	16
G372_RS0106760	0.290803	0.463182	-0.115683	0.109511	5.669	0.0184058	0.00343855	0.0145503	0.0106697	0.0145503	thioredoxin	315	313	285	285	253	289
G372_RS0107890	0.291683	0.464307	-0.10774	0.102178	5.49989	0.0104823	0.00451463	0.00423521	0.0111458	0.0111458	polyisoprenoid-binding protein	301	198	287	210	202	292
G372_RS0112460	0.292212	0.464874	0.109848	0.104291	5.36797	0.00691791	0.00470271	-0.000580288	0.0116122	0.0116122	SOS response-associated peptidase	250.85	233	273	180	162	206
G372_RS0102550	0.293411	0.466244	-0.184373	0.175481	4.4232	0.0471505	0.0118382	0.0343524	0.0179826	0.0343524	nicotinate-nucleotide diphosphorylase (carboxylating)	81	79	93	87	88	71
G372_RS0111635	0.293419	0.466244	-0.13618	0.129615	4.69462	0.0228351	0.00934932	0.0122402	0.0158509	0.0158509	YafY family transcriptional regulator	110	91	145	89	94	137
G372_RS0103185	0.294136	0.466852	0.143368	0.136659	4.53115	0.0159171	0.0109122	0.0012763	0.0171012	0.0171012	transcriptional repressor LexA	113	92	130	88	58	90
G372_RS0106055	0.294323	0.466852	-0.0896957	0.0855317	6.5924	0.00545629	0.00129961	0.00250376	0.00967389	0.00967389	glutamyl-tRNA reductase	831	645	873	680	538	877
G372_RS0112805	0.294201	0.466852	0.106359	0.101395	5.49502	0.00391441	0.00426044	-0.00360949	0.0111611	0.0111611	DUF21 domain-containing protein	311	242	309	211	174	241
G372_RS0104535	0.295507	0.468452	-0.101935	0.0974414	6.18602	0.014511	0.00210471	0.0121375	0.00981236	0.0121375	fructose-bisphosphate aldolase class I	612	373	594	425	390	582
G372_RS0107605	0.296016	0.468983	0.196489	0.188025	3.92573	0.0540066	0.0193169	0.0337133	0.0227352	0.0337133	ANTAR domain-containing protein	83	59	48	49	33	42
G372_RS0109655	0.296838	0.470008	-0.266311	0.255273	6.13685	0.0994739	0.00226477	0.095482	0.00986794	0.095482	inositol-phosphate phosphatase	556	463	355	357	351	850
G372_RS0106140	0.298355	0.472131	0.0961004	0.0924071	5.9851	0.0103985	0.00274447	0.00679043	0.0100641	0.0100641	ABC transporter	497	401	501	293	287	466
G372_RS0107200	0.298943	0.472783	0.0901754	0.0868153	7.19883	0.00423995	0.000702859	0.00154773	0.0106025	0.0106025	bifunctional GTP diphosphokinase/guanosine-3',5'-bis(diphosphate) 3'-diphosphatase	1744	1274	1703	1143	929	1424
G372_RS0105370	0.300113	0.474356	-0.0896255	0.0864953	7.05222	0.00737419	0.000949038	0.00525642	0.0102731	0.0102731	DUF1631 domain-containing protein	1259	1015	1456	1122	941	1208
G372_RS0101685	0.300671	0.474679	0.179961	0.173876	5.76852	0.0459955	0.00295228	0.0423973	0.0104282	0.0423973	HNH endonuclease	392	353	427	312	259	223
G372_RS0105780	0.300671	0.474679	-0.103394	0.0998984	5.95917	0.0151828	0.0024588	0.0125107	0.0101002	0.0125107	MBL fold metallo-hydrolase	420	349	467	314	299	521
G372_RS0104030	0.300848	0.474679	0.0976801	0.0944119	5.82446	0.0129699	0.00305367	0.00958067	0.0103167	0.0103167	hypothetical protein	478	328	394	256	238	396
G372_RS0104780	0.302413	0.476869	-0.285665	0.277003	7.77709	0.116558	0.000403177	0.114693	0.0122549	0.114693	efflux RND transporter periplasmic adaptor subunit	2422	1674	3011	4038	1525	2447
G372_RS14110	0.302693	0.47703	0.229733	0.222896	3.26103	0.0583847	0.0421124	0.0110769	0.0324113	0.0324113	hypothetical protein	38	27	32	17	25	20
G372_RS0104135	0.303459	0.477502	-0.101122	0.0982678	5.69026	0.0146556	0.00371551	0.0107693	0.0106143	0.0107693	5-(carboxyamino)imidazole ribonucleotide mutase	347	281	314	238	230	397
G372_RS0106645	0.303881	0.477502	-0.142743	0.138835	4.66257	0.0292428	0.0097417	0.019171	0.0160879	0.019171	PDZ domain-containing protein	151	80	108	92	84	136
G372_RS0107790	0.303531	0.477502	-0.323947	0.314851	2.97791	0.15044	0.0608112	0.0878854	0.0381718	0.0878854	hypothetical protein	17	23	15	12	21	33
G372_RS0111465	0.303627	0.477502	-0.097993	0.0952604	5.74467	0.00992171	0.00313099	0.00567015	0.0104808	0.0104808	molybdopterin converting factor subunit 1	343	287	368	252	266	380
G372_RS0113185	0.303831	0.477502	-0.0940213	0.0914379	5.9153	0.00668773	0.00237684	0.00266782	0.0101645	0.0101645	hypothetical protein	388	338	464	354	292	409
G372_RS0105360	0.305331	0.4795	0.10681	0.104198	5.36022	0.0155818	0.00464218	0.0105569	0.0116437	0.0116437	hypothetical protein	309	211	238	197	133	225
G372_RS0108455	0.305951	0.480193	-0.185186	0.180889	5.48093	0.0495532	0.00419016	0.0448912	0.0112061	0.0448912	diaminopimelate decarboxylase	269	243	220	183	189	380
G372_RS0112340	0.306378	0.480582	0.452261	0.442157	1.95324	0.182805	0.221403	-0.0695998	0.0718509	0.0718509	tRNA-Leu	6	11	12	3	4	8
G372_RS13935	0.306627	0.480692	0.168509	0.164829	4.01919	0.0220692	0.0190364	-0.00209816	0.0217166	0.0217166	hypothetical protein	85	51	69	49	40	48
G372_RS0101850	0.307268	0.481416	-0.0956574	0.0936925	5.84225	0.00973573	0.002883	0.00585528	0.0102844	0.0102844	ParA family protein	362	306	440	345	274	360
G372_RS0107395	0.307833	0.48202	0.125507	0.123073	4.87357	0.00526209	0.00811857	-0.00744799	0.0146018	0.0146018	tyrosine protein kinase	163	134	169	112	91	130
G372_RS0101950	0.309696	0.484656	0.273413	0.269144	6.27279	0.109353	0.0018946	0.106764	0.00973009	0.106764	co-chaperone GroES	611	695	728	675	286	369
G372_RS0103470	0.309899	0.484691	-0.144896	0.142694	6.15572	0.0307323	0.00212887	0.0284134	0.00984593	0.0284134	YqgE/AlgH family protein	599	482	402	466	420	480
G372_RS0103905	0.310809	0.485832	0.10563	0.104221	5.92842	0.0163817	0.00286251	0.0134304	0.0101448	0.0134304	glutamate--cysteine ligase	504	387	438	282	249	464
G372_RS0105815	0.311505	0.486353	-0.0865553	0.0855232	6.78473	0.00557951	0.00113008	0.00303487	0.00984124	0.00984124	glutamine-hydrolyzing GMP synthase	1075	827	942	881	698	925
G372_RS0107365	0.311409	0.486353	0.131427	0.129833	4.68121	0.0146506	0.00933547	0.00250045	0.0159496	0.0159496	DUF493 domain-containing protein	138	105	144	105	68	103
G372_RS0107655	0.312976	0.488083	0.109269	0.108295	5.25569	0.00874559	0.00546325	0.000991329	0.0121284	0.0121284	nickel transporter	252	208	217	148	140	207
G372_RS0107860	0.312941	0.488083	0.690927	0.684716	5.84828	0.705817	0.0045235	0.698731	0.0102738	0.698731	hypothetical protein	837	373	518	810	110	119
G372_RS0113290	0.314258	0.489798	0.11922	0.118471	4.96004	0.0131889	0.00703735	0.0041187	0.0140156	0.0140156	two-component system sensor histidine kinase PhoR	188	152	166	102	107	159
G372_RS0111530	0.315099	0.490823	0.0889064	0.088501	7.42514	0.00397527	0.000557284	0.00144768	0.0111914	0.0111914	thioredoxin TrxA	1996	1690	2208	1449	1183	1743
G372_RS0103790	0.315884	0.491567	0.115849	0.115507	5.01463	0.011161	0.00637426	0.00254416	0.0136387	0.0136387	endonuclease III domain-containing protein	181	156	197	145	102	139
G372_RS0113055	0.315942	0.491567	-0.175788	0.175292	7.16936	0.0461432	0.000784807	0.0453061	0.0105313	0.0453061	threonine--tRNA ligase	1486	1419	1102	1172	923	1907
G372_RS0110880	0.316593	0.492294	-0.206877	0.206571	3.319	0.0640453	0.0318816	0.0321257	0.0313693	0.0321257	hypothetical protein	31	18	36	33	25	24
G372_RS0111715	0.318082	0.494324	0.0940007	0.0941507	5.85906	0.0114332	0.00304141	0.00793654	0.0102551	0.0102551	hypothetical protein	444	380	404	259	256	406
G372_RS0104765	0.319579	0.496255	-0.274961	0.276253	5.31672	0.11426	0.00480923	0.109664	0.0118304	0.109664	hypothetical protein	204	216	174	340	133	203
G372_RS0105935	0.319694	0.496255	-0.157374	0.158151	4.90126	0.0374442	0.00755806	0.0299597	0.0144171	0.0299597	hypothetical protein	169	136	114	110	131	153
G372_RS0107160	0.32001	0.496459	-0.126028	0.126733	5.05773	0.0240384	0.00622056	0.0178713	0.013344	0.0178713	glutamate 5-kinase	188	133	176	177	134	142
G372_RS0112900	0.320276	0.496586	-0.232255	0.233683	5.07061	0.0817119	0.00614593	0.0757656	0.0132571	0.0757656	iron donor protein CyaY	192	144	141	147	97	288
G372_RS0103930	0.320888	0.497083	-0.233058	0.234787	3.14487	0.0384564	0.0480529	-0.0203509	0.0346347	0.0346347	group 1 truncated hemoglobin	26	15	29	22	19	29
G372_RS0111525	0.320967	0.497083	-0.306652	0.308977	6.71209	0.142771	0.00128207	0.141919	0.00976344	0.141919	transcription termination factor Rho	975	811	612	641	566	1754
G372_RS0102010	0.321319	0.497341	-0.107792	0.108688	9.01254	0.00681165	0.000125421	0.004032	0.0175943	0.0175943	type IV pilus secretin PilQ	9491	7068	9678	8306	6482	8728
G372_RS0107680	0.321714	0.497666	-0.216043	0.218017	3.19641	0.0447585	0.0376722	0.0007731	0.0336252	0.0336252	sulfite exporter TauE/SafE family protein	34	20	20	24	18	32
G372_RS0112630	0.322491	0.498581	0.164235	0.166002	4.03674	0.0272963	0.019802	0.00420355	0.0215332	0.0215332	hypothetical protein	83	59	64	48	32	65
G372_RS0110575	0.322771	0.498726	-0.0899772	0.0909981	6.06078	0.0089178	0.00245721	0.00565408	0.00996378	0.00996378	polyamine ABC transporter ATP-binding protein	518	386	474	369	390	452
G372_RS0103795	0.323429	0.49917	-0.106028	0.107377	5.24766	0.00560518	0.0051239	-0.00233319	0.012171	0.012171	23S rRNA pseudouridylate synthase B	210	183	209	167	152	228
G372_RS0108980	0.323282	0.49917	-0.159324	0.161303	5.53443	0.0388375	0.00361198	0.0354158	0.0110407	0.0354158	ABC transporter permease	271	225	288	320	209	222
G372_RS0107850	0.323899	0.499608	0.8113	0.822421	8.48392	1.00911	0.000313944	1.01425	0.0149833	1.01425	MBL fold metallo-hydrolase	9703	4942	11005	13136	1770	1042
G372_RS0100555	0.324195	0.499778	-0.213317	0.216374	3.37776	0.0306397	0.0398702	-0.0186348	0.0303564	0.0303564	DUF1295 domain-containing protein	28	23	37	30	21	38
G372_RS0100640	0.326704	0.503356	-0.451632	0.460485	4.60857	0.315647	0.0108757	0.307193	0.0164962	0.307193	tRNA-Trp	134	136	38	118	82	147
G372_RS0104255	0.327245	0.503901	0.209246	0.213586	3.76068	0.0678778	0.0241888	0.0442396	0.0247172	0.0442396	hypothetical protein	59	56	44	24	35	48
G372_RS0104845	0.329321	0.506807	0.180814	0.185359	3.71669	0.0509181	0.0262491	0.0251383	0.0252876	0.0252876	tRNA (adenosine(37)-N6)-threonylcarbamoyltransferase complex ATPase subunit type 1 TsaE	71	39	44	27	35	39
G372_RS0103220	0.32955	0.506869	0.107839	0.110602	5.21236	0.0167437	0.00598302	0.0105856	0.0123662	0.0123662	cell division protein ZapA	214	206	226	178	135	157
G372_RS0112410	0.329871	0.507073	0.0834128	0.0856066	6.5879	0.00440904	0.00132125	0.00158091	0.00967149	0.00967149	DUF1538 domain-containing protein	930	716	899	654	486	768
G372_RS0102835	0.331109	0.508684	0.243014	0.250045	2.93587	0.0569777	0.0546528	-0.0055766	0.0391308	0.0391308	HypC/HybG/HupF family hydrogenase formation chaperone	26	17	28	12	17	15
G372_RS0108465	0.331893	0.509463	0.163011	0.167999	5.13592	0.0418401	0.00624644	0.036089	0.012829	0.036089	diaminopimelate epimerase	215	166	241	157	144	122
G372_RS0109880	0.332184	0.509463	0.0840583	0.0866827	7.12521	0.00663534	0.000841666	0.00480284	0.0104292	0.0104292	dihydroxy-acid dehydratase	1639	1217	1507	1173	893	1168
G372_RS0111400	0.332177	0.509463	-0.1721	0.17747	4.60878	0.0466803	0.0106444	0.0365991	0.0164947	0.0365991	endopeptidase La	112	81	117	78	73	164
G372_RS0101385	0.33271	0.509978	0.217501	0.224535	6.62793	0.0746914	0.00144727	0.074177	0.00969535	0.074177	nucleoside triphosphate pyrophosphohydrolase	1193	614	1127	850	417	635
G372_RS0102525	0.332936	0.510033	-0.128831	0.13306	6.17778	0.0262253	0.00201348	0.0245441	0.00982127	0.0245441	copper resistance protein CopD	508	449	557	573	386	443
G372_RS0100405	0.334058	0.511461	0.108591	0.112416	5.16281	0.0163206	0.00629537	0.00968335	0.0126607	0.0126607	ubiquinone-binding protein	195	216	204	154	127	166
G372_RS0100500	0.335794	0.513534	-0.103869	0.107915	5.23519	0.00401636	0.00523008	-0.00425544	0.0122385	0.0122385	ABC transporter ATP-binding protein	221	173	203	171	154	211
G372_RS0103965	0.335719	0.513534	-0.0911595	0.0946956	5.76897	0.00624669	0.00302371	0.00166838	0.0104272	0.0104272	hypothetical protein	360	279	392	314	236	366
G372_RS0105560	0.336284	0.51399	-0.288585	0.30013	3.76096	0.133078	0.0292019	0.105915	0.0247136	0.105915	CBS domain-containing protein	46	45	33	26	44	75
G372_RS0105095	0.336586	0.514159	-0.213618	0.222303	3.73085	0.0729921	0.0270743	0.0470535	0.0251019	0.0470535	hypothetical protein	56	32	39	36	27	72
G372_RS0100225	0.337542	0.514249	-0.265855	0.277211	2.66471	0.031583	0.0692189	-0.0562447	0.0460498	0.0460498	thiamine phosphate synthase	13	11	17	14	13	16
G372_RS13675	0.337702	0.514249	0.286128	0.29845	3.91807	0.131448	0.0268918	0.106717	0.0228219	0.106717	glyoxalase/bleomycin resistance/dioxygenase family protein	84.2618	52.9627	58.9675	26.6382	26.8141	80.9014
G372_RS0101755	0.33744	0.514249	0.140445	0.146414	4.34687	0.0162863	0.0135237	-0.00056264	0.0186317	0.0186317	DUF2062 domain-containing protein	105	75	98	54	62	79
G372_RS0101895	0.3379	0.514249	-0.082278	0.0858563	6.85313	0.00425894	0.00112673	0.00165832	0.00993023	0.00993023	flagellar biosynthesis protein FlhF	1118	834	1110	937	717	1033
G372_RS0107335	0.337123	0.514249	-0.0821722	0.0856081	6.60896	0.00556638	0.00130976	0.00311612	0.00968335	0.00968335	penicillin-binding protein 2	885	715	786	711	539	870
G372_RS0111515	0.337984	0.514249	0.143096	0.149346	4.59877	0.0329079	0.0111538	0.0223024	0.0165716	0.0223024	CPXCG motif-containing cysteine-rich protein	142	108	108	94	54	111
G372_RS0112405	0.337815	0.514249	0.168286	0.175574	3.95974	0.0454876	0.0192016	0.0270378	0.0223562	0.0270378	SDR family oxidoreductase	73	58	59	33	34	70
G372_RS0106045	0.340723	0.518123	0.18504	0.19422	3.62709	0.0116004	0.030074	-0.0284136	0.026508	0.026508	peptide chain release factor N(5)-glutamine methyltransferase	47	39	51	29	26	37
G372_RS0102180	0.341005	0.518258	-0.207584	0.218009	3.62003	0.0699609	0.0263152	0.0449768	0.0266077	0.0449768	exodeoxyribonuclease VII small subunit	39	43	30	30	28	59
G372_RS0101990	0.341309	0.518427	0.245635	0.258133	4.81026	0.0980601	0.00835533	0.0915937	0.0150294	0.0915937	carbohydrate kinase	154	138	172	59	91	170
G372_RS0110015	0.341685	0.518705	0.0815055	0.0857194	6.6645	0.00646059	0.00129975	0.00428481	0.00972199	0.00972199	AcrB/AcrD/AcrF family protein	973	727	1062	644	555	862
G372_RS0106080	0.343917	0.521798	-0.095314	0.100706	6.39877	0.0148956	0.00156975	0.0136429	0.00965522	0.0136429	ribose-phosphate pyrophosphokinase	620	634	660	488	493	752
G372_RS0110295	0.344936	0.522753	-0.0833184	0.0882182	6.25469	0.00749408	0.00192827	0.0048361	0.00974541	0.00974541	chromosome partitioning protein ParB	603	469	606	471	372	658
G372_RS0112655	0.344902	0.522753	-0.244541	0.258905	7.20166	0.0983781	0.000793017	0.0997544	0.0106094	0.0997544	peroxiredoxin	1602	871	1655	1876	1246	1078
G372_RS0110110	0.346556	0.524912	-0.171823	0.182539	4.82605	0.0488416	0.00824384	0.0417371	0.0149212	0.0417371	murein biosynthesis integral membrane protein MurJ	142	122	118	87	111	186
G372_RS0108985	0.347008	0.525302	0.0817446	0.0869246	6.44319	0.00448374	0.00169001	0.00140885	0.00964383	0.00964383	ABC transporter ATP-binding protein	832	581	800	548	454	637
G372_RS0110765	0.347422	0.525337	-0.121266	0.129061	4.73389	0.0138564	0.00941914	0.00238685	0.0155661	0.0155661	Hsp20/alpha crystallin family protein	137	107	114	102	83	149
G372_RS0112320	0.347379	0.525337	-0.121304	0.12909	4.70202	0.00917071	0.00919942	-0.003254	0.0157968	0.0157968	hypothetical protein	132	100	115	94	96	127
G372_RS0111615	0.347854	0.525693	0.0809445	0.0862249	6.90782	0.0108873	0.00103399	0.0101181	0.0100121	0.0101181	NAD-dependent succinate-semialdehyde dehydrogenase	1307	935	1275	904	801	884
G372_RS0107915	0.348925	0.526719	0.227468	0.242846	3.70909	0.0862913	0.0305457	0.0579153	0.0253879	0.0579153	class I SAM-dependent methyltransferase	63	52	39	42	19	42
G372_RS13900	0.348779	0.526719	-0.147411	0.157329	4.14283	0.0321551	0.0166541	0.0153911	0.0204747	0.0204747	RtT sRNA	61	65	68	51	47	92
G372_RS13925	0.3502	0.527163	-0.256895	0.274989	6.55379	0.110541	0.00148707	0.111941	0.00965565	0.111941	AbiV family abortive infection protein	697	632	736	446	594	1386
G372_RS0106715	0.349678	0.527163	-0.229321	0.245207	6.27758	0.0879284	0.00186287	0.088327	0.00972621	0.088327	NAD(P)-dependent oxidoreductase	421	453	773	632	530	459
G372_RS0106995	0.350094	0.527163	-0.0853686	0.0913613	6.02652	0.0032754	0.00251177	-0.00115045	0.0100086	0.0100086	pantoate--beta-alanine ligase	487	373	474	403	325	445
G372_RS0107500	0.350173	0.527163	0.0841239	0.090044	7.39801	0.0118526	0.000648688	0.0115132	0.0111169	0.0115132	lipoate--protein ligase family protein	2007	1629	2085	1652	1130	1486
G372_RS0110570	0.350094	0.527163	-0.085556	0.0915619	5.99309	0.00496006	0.00252213	0.000933008	0.0100532	0.0100532	MCE family protein	485	364	441	403	305	429
G372_RS0102220	0.350628	0.527512	-0.0803907	0.0861292	7.10642	0.0077627	0.000739904	0.00653998	0.0103875	0.0103875	outer membrane protein assembly factor BamC	1357	1283	1275	1142	1007	1287
G372_RS0101540	0.351625	0.528717	0.105185	0.112928	5.12923	0.00747247	0.00625727	-0.00106566	0.0128717	0.0128717	IS110 family transposase	203.726	181.87	208.568	128.889	123.862	184.763
G372_RS0108365	0.351852	0.528762	0.0929971	0.0998892	5.60818	0.0107207	0.00413513	0.00602253	0.0108316	0.0108316	hypothetical protein	312	273	376	236	215	250
G372_RS0111605	0.352521	0.529472	0.10909	0.117338	4.98004	0.00567662	0.00677477	-0.00414173	0.0138775	0.0138775	multifunctional CCA addition/repair protein	180	154	179	115	103	158
G372_RS0103955	0.352887	0.529724	-0.197629	0.212732	5.54996	0.0660233	0.0038885	0.0639941	0.0109951	0.0639941	hypothetical protein	334	260	200	203	205	396
G372_RS0101700	0.353113	0.529729	-0.114345	0.123141	5.35019	0.022119	0.00502863	0.017717	0.0116852	0.017717	hypothetical protein	242	169	264	167	167	286
G372_RS0106710	0.353284	0.529729	-0.11009	0.118601	4.94593	0.0182357	0.00698651	0.0112632	0.0141128	0.0141128	DUF72 domain-containing protein	171	104	181	125	116	162
G372_RS0110125	0.354819	0.531733	0.089962	0.0972264	5.73525	0.00681742	0.00367692	0.00180992	0.0105025	0.0105025	GNAT family N-acetyltransferase	372	304	413	239	236	331
G372_RS0103880	0.355634	0.532659	0.202833	0.219583	3.38465	0.0212155	0.042085	-0.0309935	0.0302404	0.0302404	hypothetical protein	36	29	44	22	19	31
G372_RS0107180	0.356842	0.53417	-0.251048	0.272464	5.72043	0.107991	0.00370714	0.107648	0.0105379	0.107648	octaprenyl diphosphate synthase	379	311	227	234	225	566
G372_RS0106880	0.357254	0.534488	0.169438	0.184049	4.11333	0.0492617	0.0154348	0.0353764	0.0207605	0.0353764	23S rRNA (pseudouridine(1915)-N(3))-methyltransferase RlmH	72	79	70	37	45	75
G372_RS0110770	0.359645	0.537766	0.149638	0.163353	4.01055	0.0240915	0.0182184	0.0034992	0.0218077	0.0218077	rhomboid family intramembrane serine protease	80	60	59	50	41	46
G372_RS0101100	0.360613	0.538614	-0.18615	0.203621	3.49199	0.0601493	0.0322221	0.0299701	0.0285065	0.0299701	YcgL domain-containing protein	34	28	37	41	18	44
G372_RS0113140	0.360605	0.538614	0.154734	0.169254	6.4173	0.0415593	0.00174721	0.0412234	0.00964942	0.0412234	hypothetical protein	588	831	817	547	420	572
G372_RS0107025	0.360865	0.538691	0.0789241	0.0863769	7.03604	0.00480631	0.000950763	0.00272124	0.0102407	0.0102407	outer membrane protein assembly factor BamD	1485	1113	1381	964	770	1271
G372_RS0104240	0.361354	0.538823	-0.102636	0.112442	5.18961	0.00429764	0.00646622	-0.00504446	0.0124987	0.0124987	ferredoxin family protein	204	159	209	160	146	207
G372_RS0104500	0.361158	0.538823	-0.162973	0.178471	4.42724	0.0461904	0.0119109	0.035867	0.0179489	0.035867	hypothetical protein	80	77	101	71	56	134
G372_RS0104145	0.362355	0.540015	0.185429	0.20357	5.16023	0.0600439	0.00587863	0.0562823	0.0126766	0.0562823	globin	241	217	183	138	90	231
G372_RS0111445	0.362728	0.540272	-0.115659	0.127073	5.14313	0.0233903	0.00564407	0.0185774	0.0127833	0.0185774	oxidative damage protection protein	200	171	169	165	112	232
G372_RS0104265	0.364029	0.54191	-0.144206	0.158867	4.24218	0.0365252	0.0153268	0.0225314	0.0195558	0.0225314	hypothetical protein	66	66	84	86	53	65
G372_RS13405	0.365036	0.542807	0.228817	0.252611	3.03714	0.0297627	0.0588498	-0.0412805	0.0368685	0.0368685	IS110 family transposase	26.2743	22.1298	28.4324	13.1112	16.1381	20.2367
G372_RS13945	0.364854	0.542807	0.285967	0.315582	3.80647	0.109031	0.125246	-0.0196236	0.0241428	0.0241428	hypothetical protein	52.542	68.3436	52.236	24.1332	43.4083	39.3461
G372_RS0101075	0.365727	0.543233	-0.103113	0.113999	6.08965	0.0187845	0.00245377	0.0170398	0.00992634	0.0170398	EF-P lysine aminoacylase GenX	553	385	476	396	301	607
G372_RS0111080	0.365603	0.543233	-0.0960619	0.106176	5.28016	0.00400424	0.00490665	-0.00336181	0.0120034	0.0120034	hypothetical protein	218	177	233	188	157	213
G372_RS0105725	0.365989	0.543322	0.106772	0.118109	5.88342	0.0201597	0.00254904	0.0183755	0.0102146	0.0183755	alanine--glyoxylate aminotransferase family protein	473	426	371	342	248	335
G372_RS0100195	0.366676	0.543588	-0.294842	0.326616	4.80897	0.154093	0.00860616	0.151411	0.0150382	0.151411	proteasome-type protease	141	110	104	90	80	285
G372_RS0108900	0.366812	0.543588	0.115258	0.127715	4.81738	0.0235588	0.00873383	0.015733	0.0149805	0.015733	TIGR02281 family clan AA aspartic protease	155	120	165	122	95	98
G372_RS0109425	0.366977	0.543588	-0.223708	0.247973	3.79095	0.0888022	0.0244117	0.067824	0.0243353	0.067824	hypothetical protein	41	53	38	44	51	38
G372_RS0112685	0.366849	0.543588	0.0918683	0.101805	8.56272	0.00720464	0.00020638	0.0056345	0.0153401	0.0153401	ribulose bisphosphate carboxylase small subunit	6026	5349	7048	4593	3950	4979
G372_RS0101475	0.367304	0.543772	0.16105	0.178639	7.07722	0.0460755	0.000904032	0.046964	0.0103248	0.046964	protease modulator HflC	1493	1442	1357	1244	875	867
G372_RS0102075	0.36767	0.544015	-0.103449	0.114835	6.14765	0.0190351	0.00235665	0.0174241	0.00985524	0.0174241	hypothetical protein	494.968	428.478	568.48	506.665	395.504	429.969
G372_RS0113065	0.368084	0.544327	-0.0948775	0.105412	6.36788	0.0160344	0.00182304	0.0148443	0.00966803	0.0148443	50S ribosomal protein L35	631	659	569	530	462	673
G372_RS0102495	0.368585	0.544515	0.0976267	0.108579	7.46626	0.0170067	0.000556789	0.0171274	0.0113062	0.0171274	stringent starvation protein A	1963	1985	2191	1694	1294	1522
G372_RS0108480	0.368616	0.544515	0.214233	0.238284	3.90832	0.0819038	0.0190629	0.0661059	0.022933	0.0661059	ATP-dependent protease subunit HslV	60	67	57	30	29	72
G372_RS0100295	0.369728	0.545857	-0.0855865	0.0954159	5.79844	0.00326264	0.0032897	-0.00195829	0.0103666	0.0103666	transglutaminase	367	300	394	299	260	378
G372_RS0100100	0.369983	0.545933	0.132502	0.147799	6.25255	0.0314803	0.0019092	0.0308574	0.00974728	0.0308574	DUF1902 domain-containing protein	695	531	638	535	393	394
G372_RS0100495	0.372043	0.548406	0.104118	0.116639	5.07142	0.00812743	0.00715522	-0.00106114	0.0132517	0.0132517	ABC transporter permease	199	181	180	130	113	169
G372_RS0103510	0.372271	0.548406	0.103767	0.116301	7.11452	0.0194614	0.000777452	0.0195115	0.0104053	0.0195115	hypothetical protein	1665	1216	1481	931	789	1566
G372_RS0106620	0.372196	0.548406	0.0996669	0.111688	5.49593	0.0179491	0.00354977	0.0151616	0.0111583	0.0151616	DNA mismatch repair protein MutS	302	249	307	254	168	210
G372_RS0102390	0.373462	0.549859	0.110948	0.12466	7.60952	0.0223411	0.000457483	0.0228528	0.0117255	0.0228528	cell division protein FtsZ	2564	1748	2987	1878	1526	1754
G372_RS0103250	0.373957	0.55013	-0.12644	0.142214	5.19223	0.0290658	0.00460491	0.0257322	0.0124832	0.0257322	ubiquinone biosynthesis protein UbiH	176	165	227	177	174	164
G372_RS0108310	0.374056	0.55013	-0.117847	0.132576	5.62246	0.0252579	0.00340799	0.0229565	0.010793	0.0229565	ATP-dependent protease	367	208	319	221	233	353
G372_RS0109245	0.374844	0.550988	0.0763721	0.0860592	7.09609	0.00817832	0.000744271	0.00729137	0.010365	0.010365	HDOD domain-containing protein	1652	1164	1416	1017	804	1387
G372_RS0104840	0.37512	0.551092	0.14099	0.158965	7.59105	0.0362873	0.00048425	0.0374206	0.0116697	0.0374206	AMIN domain-containing protein	2579	1886	2724	2102	1437	1505
G372_RS0103435	0.375585	0.551474	-0.0872856	0.0985097	8.32973	0.00664913	0.00023963	0.00521474	0.0143166	0.0143166	twitching motility protein PilT	4640	3541	5253	3981	3261	4525
G372_RS0101120	0.376539	0.552573	-0.221644	0.250647	2.9028	0.0225292	0.0543303	-0.0445912	0.0399054	0.0399054	ATP-binding protein	21	13	20	18	15	21
G372_RS0107480	0.377839	0.554178	0.224712	0.254809	5.72034	0.0930621	0.00332763	0.0940641	0.0105381	0.0940641	glycine cleavage system protein H	298	405	453	302	245	197
G372_RS0101285	0.378046	0.554179	0.0751652	0.0852695	6.86166	0.00251832	0.000963952	6.52681e-05	0.00994238	0.00994238	ATP-binding protein	1215	965	1147	842	708	943
G372_RS0101995	0.378465	0.55449	-0.130355	0.148008	4.41399	0.0313854	0.0134215	0.019438	0.0180598	0.019438	DUF4440 domain-containing protein	83	78	97	76	53	121
G372_RS0102780	0.379741	0.556056	-0.102427	0.11661	5.02479	0.0106174	0.00682791	0.00250966	0.0135688	0.0135688	sterol-binding protein	199	125	166	134	127	173
G372_RS0102820	0.380718	0.556274	-0.150813	0.172048	5.24964	0.0423438	0.00511319	0.0392874	0.0121604	0.0392874	hypothetical protein	207	178	205	137	152	299
G372_RS0106615	0.380599	0.556274	0.0849267	0.0968606	5.74284	0.00646228	0.00358799	0.00178515	0.010485	0.010485	serine protease	404	287	409	249	226	342
G372_RS0108010	0.380675	0.556274	-0.0761309	0.0868426	7.186	0.00853162	0.00074123	0.00774983	0.0105712	0.0105712	class I SAM-dependent methyltransferase	1529	1105	1679	1177	1130	1404
G372_RS0112325	0.380122	0.556274	-0.142138	0.161949	4.6372	0.0375338	0.010098	0.0292431	0.0162784	0.0292431	chemotaxis protein MotA	109	100	111	87	69	162
G372_RS0112010	0.381453	0.557046	-0.0785786	0.0897814	6.12199	0.0042967	0.00220521	0.000850188	0.00988583	0.00988583	pirin family protein	508	449	508	394	378	516
G372_RS0103030	0.382403	0.557671	-0.355295	0.40676	5.0557	0.236415	0.00643884	0.241741	0.0133578	0.241741	ribosome maturation factor RimP	165	177	106	126	93	403
G372_RS0103465	0.382504	0.557671	0.089267	0.102219	5.44792	0.00970608	0.00435734	0.00478704	0.0113158	0.0113158	Holliday junction resolvase RuvX	271	222	327	201	179	219
G372_RS0106735	0.382203	0.557671	0.130364	0.149185	4.23857	0.00671194	0.0137957	-0.0117788	0.0195884	0.0195884	DUF2384 domain-containing protein	90	70	87	61	46	69
G372_RS0100685	0.383494	0.558206	0.128778	0.14777	5.90453	0.0311782	0.00273568	0.0300182	0.0101811	0.0300182	PAS domain-containing sensor histidine kinase	491	356	471	256	233	491
G372_RS0101730	0.38326	0.558206	0.0800733	0.0918371	7.76494	0.0117262	0.000435966	0.0118174	0.0122151	0.0122151	3-phosphoglycerate dehydrogenase	3023	2129	3166	2247	1748	2137
G372_RS0103940	0.383333	0.558206	-0.272444	0.312518	2.42805	0.0978609	0.0932365	0.00125497	0.0532646	0.0532646	hypothetical protein	13	8	11	7	10	20
G372_RS0106445	0.38504	0.559977	-0.293307	0.337659	6.75286	0.162625	0.00129113	0.169729	0.00980497	0.169729	DEAD/DEAH box helicase	971	876	656	615	589	1946
G372_RS0110610	0.385128	0.559977	-0.139849	0.161026	6.41323	0.0369825	0.001634	0.03726	0.00965057	0.03726	amidophosphoribosyltransferase	800	591	536	586	407	847
G372_RS0103840	0.385587	0.560343	-0.089697	0.10338	5.60188	0.0152385	0.00348783	0.0125432	0.0108488	0.0125432	ATP-dependent zinc protease	317	258	292	286	230	249
G372_RS0103605	0.385877	0.56046	0.114718	0.132298	5.69678	0.0249515	0.00367522	0.022579	0.0105973	0.022579	M48 family peptidase	386	267	419	311	186	277
G372_RS0109670	0.386323	0.560805	-0.101859	0.117579	4.96095	0.0064859	0.00672772	-0.00251105	0.0140093	0.0140093	1,6-anhydro-N-acetylmuramyl-L-alanine amidase AmpD	173	128	154	145	108	155
G372_RS0101865	0.386939	0.560923	-0.0748884	0.086558	7.1329	0.00930487	0.000791884	0.0087361	0.0104465	0.0104465	chemotaxis response regulator protein-glutamate methylesterase	1355	1104	1620	1266	913	1375
G372_RS0104250	0.386809	0.560923	-0.217127	0.250892	2.87506	0.0415419	0.0538514	-0.019603	0.0405691	0.0405691	hypothetical protein	20	18	14	16	17	19
G372_RS0105960	0.387111	0.560923	0.125973	0.145655	6.1605	0.0302192	0.00223415	0.029589	0.00984048	0.029589	lipid A export permease/ATP-binding protein MsbA	602	576	510	334	322	590
G372_RS0108220	0.38724	0.560923	0.100461	0.116189	5.41913	0.0192276	0.00477217	0.0154777	0.0114171	0.0154777	hypothetical protein	271	273	248	208	140	244
G372_RS0100130	0.388041	0.561479	0.138984	0.161015	4.07995	0.0165852	0.0177969	-0.004309	0.0210917	0.0210917	hypothetical protein	79	64	68	55	43	50
G372_RS0101565	0.387882	0.561479	-0.0959307	0.1111	7.85455	0.0175726	0.000391076	0.0181236	0.0125143	0.0181236	quinolinate synthase NadA	2846	2281	3154	2775	2171	2374
G372_RS0100440	0.388312	0.561568	0.229477	0.266004	2.87798	0.028156	0.0656384	-0.0501908	0.0404988	0.0404988	hypothetical protein	21	23	21	14	11	17
G372_RS0101025	0.389507	0.561875	0.0984989	0.114466	5.0352	0.0143929	0.00615604	0.0081968	0.0134975	0.0134975	hypothetical protein	206	176	159	126	118	151
G372_RS0107470	0.389381	0.561875	0.13807	0.160408	8.59245	0.036596	0.000182107	0.0384142	0.0154776	0.0384142	heterodisulfide reductase subunit C	6180	6258	6883	5663	3935	4135
G372_RS0107510	0.388949	0.561875	-0.0874777	0.101538	8.54498	0.0057839	0.000206181	0.00415406	0.0152588	0.0152588	radical SAM protein	6108	4582	5881	5246	3993	5351
G372_RS0107700	0.389103	0.561875	-0.434193	0.504146	7.49372	0.361553	0.000678173	0.380567	0.0113842	0.380567	molybdopterin containing oxidoreductase	1826	1304	1753	799	1838	5478
G372_RS0111240	0.38957	0.561875	-0.156739	0.18217	3.73519	0.0214208	0.0247333	-0.00716996	0.0250454	0.0250454	methyltransferase domain-containing protein	47	31	53	40	37	44
G372_RS0107455	0.389959	0.562135	-0.204104	0.237415	9.5727	0.0801367	6.95084e-05	0.0844794	0.0209442	0.0844794	heterodisulfide reductase subunit B	14526	13354	15551	19783	13540	10882
G372_RS0105305	0.390549	0.562684	-0.087024	0.101353	5.49135	0.00707166	0.00423598	0.00176366	0.0111727	0.0111727	CDP-diacylglycerol--glycerol-3-phosphate 3-phosphatidyltransferase	270	245	260	216	210	258
G372_RS0108525	0.391152	0.562948	0.123011	0.143448	4.4474	0.0110966	0.0130847	-0.0048883	0.0177813	0.0177813	hydrogenase maturation protease	94	95	114	73	60	84
G372_RS0109055	0.391022	0.562948	-0.103028	0.120113	4.93896	0.00911506	0.00747988	-6.66203e-05	0.0141607	0.0141607	hypothetical protein	150	120	177	125	119	153
G372_RS0105185	0.393059	0.564786	0.0987093	0.115574	5.07559	0.0187033	0.00681221	0.0129131	0.0132236	0.0132236	phage tail tape measure protein	209	164	190	123	101	204
G372_RS0106430	0.392753	0.564786	-0.0870001	0.101798	5.50301	0.0147061	0.00372496	0.0118193	0.0111361	0.0118193	MBL fold hydrolase	311	222	258	195	226	275
G372_RS0108765	0.392877	0.564786	0.0773084	0.0904815	6.14491	0.00983016	0.00242192	0.00762456	0.00985844	0.00985844	protein TolQ	566	534	519	418	355	439
G372_RS0106540	0.394472	0.566513	-0.109172	0.128206	4.706	0.00908111	0.00888758	-0.00200567	0.0157678	0.0157678	hypothetical protein	118	102	130	108	95	111
G372_RS13800	0.395721	0.568003	0.107619	0.126717	5.31016	0.0227432	0.007074	0.0170117	0.0118602	0.0170117	hypothetical protein	262.816	203.051	250.458	132.043	164.473	233.204
G372_RS0107220	0.396478	0.568786	-0.100225	0.1182	4.97441	0.00606098	0.00704041	-0.00323106	0.0139164	0.0139164	hypothetical protein	174	132	155	125	123	164
G372_RS0106905	0.396929	0.569129	0.142998	0.168805	5.35403	0.0403289	0.00507885	0.0376641	0.0116692	0.0376641	hypothetical protein	262	180	341	193	168	169
G372_RS0103235	0.397383	0.569477	0.0974193	0.115111	5.08138	0.0187479	0.00618838	0.0136876	0.013185	0.0136876	hypothetical protein	219	151	200	164	115	137
G372_RS0109080	0.397824	0.569804	-0.130669	0.154544	4.12799	0.0186198	0.0152081	0.00166373	0.0206177	0.0206177	ABC transporter ATP-binding protein	81	48	68	64	51	63
G372_RS0110585	0.399492	0.571889	0.0921264	0.109345	5.61255	0.0168938	0.00359817	0.0143364	0.0108198	0.0143364	MoxR family ATPase	321	286	353	215	174	344
G372_RS0104180	0.400246	0.572663	0.118471	0.140839	4.52888	0.0280134	0.0117181	0.0180354	0.0171193	0.0180354	sulfurtransferase	114	108	105	80	80	74
G372_RS0104800	0.401337	0.573918	-0.0905012	0.107838	5.9582	0.0164119	0.00256787	0.0148756	0.0101016	0.0148756	DNA polymerase III subunit epsilon	488	361	395	358	262	510
G372_RS0103780	0.401731	0.574176	-0.0896949	0.106966	5.61973	0.0161437	0.00370997	0.0134527	0.0108003	0.0134527	DUF2249 domain-containing protein	259	268	363	251	228	302
G372_RS0100240	0.402229	0.574583	-0.264302	0.315529	4.59056	0.140427	0.0125862	0.136752	0.0166349	0.136752	HAD-IB family hydrolase	126	95	73	77	64	206
G372_RS0110305	0.403079	0.575491	0.0949689	0.113581	5.10561	0.0120035	0.00632628	0.00529589	0.0130247	0.0130247	16S rRNA (guanine(527)-N(7))-methyltransferase RsmG	211	152	221	121	131	176
G372_RS0103985	0.403337	0.575554	-0.0744159	0.0890488	6.14535	0.00843167	0.00203661	0.00642633	0.00985793	0.00985793	GGDEF domain-containing protein	482	499	520	420	378	516
G372_RS0111980	0.403886	0.575726	0.0725114	0.0868711	7.17651	0.00863922	0.000771545	0.00805577	0.0105483	0.0105483	phosphopyruvate hydratase	1715	1366	1471	1271	901	1268
G372_RS0112880	0.403803	0.575726	-0.151502	0.181473	3.82405	0.0309247	0.0254711	0.00457739	0.0239274	0.0239274	fluoride efflux transporter CrcB	65	32	49	42	38	53
G372_RS0107475	0.404128	0.575765	0.227581	0.27279	9.0414	0.104835	0.000125444	0.111496	0.0177519	0.111496	disulfide reductase	9489	10528	11720	9472	6658	4913
G372_RS0100085	0.404672	0.576234	-0.110374	0.132453	4.63066	0.0132935	0.00998791	0.00206051	0.0163278	0.0163278	hypothetical protein	100	102	122	88	82	126
G372_RS0111335	0.405509	0.577121	0.171409	0.206064	3.42774	0.0395225	0.0341654	0.00421979	0.0295281	0.0295281	PEP-CTERM system histidine kinase PrsK	46	35	31	20	25	31
G372_RS0102175	0.40584	0.577285	0.144742	0.174128	7.67406	0.0426696	0.00045369	0.0450271	0.0119244	0.0450271	rubrerythrin	2275	2359	3185	2129	1667	1634
G372_RS14115	0.406264	0.577583	-0.0929549	0.111928	5.11738	0.0105774	0.00584392	0.0041376	0.012948	0.012948	hypothetical protein	214.298	141.371	182.691	173.452	124.493	177.591
G372_RS0109290	0.406639	0.57781	-0.37952	0.45735	5.12713	0.294214	0.00613816	0.307616	0.0128851	0.307616	translation initiation factor IF-1	194	187	102	100	134	453
G372_RS0111100	0.407268	0.578398	-0.0774347	0.09344	5.92239	0.00702965	0.00294275	0.00359577	0.0101538	0.0101538	AMP-dependent synthetase	462	334	413	335	271	464
G372_RS0100065	0.409832	0.581732	-0.0723346	0.0877646	6.23699	0.00290436	0.00179257	-0.00012423	0.00976137	0.00976137	DUF2384 domain-containing protein	611	463	584	497	397	545
G372_RS0102600	0.410378	0.582199	0.106561	0.129443	4.70343	0.0133907	0.00934653	0.0031336	0.0157866	0.0157866	zinc ABC transporter substrate-binding protein	132	110	148	82	76	131
G372_RS0110345	0.410606	0.582215	-0.0703299	0.0854734	6.84116	0.00410692	0.00104498	0.00223381	0.00991357	0.00991357	DNA polymerase III subunit beta	1125	922	980	837	754	1042
G372_RS0112925	0.411172	0.582711	-0.208465	0.253659	2.94885	0.0233769	0.0576829	-0.0447585	0.0388315	0.0388315	hypothetical protein	21	18	17	20	16	20
G372_RS0103195	0.41224	0.58374	-0.0820022	0.100008	5.51339	0.0119105	0.00389826	0.00846824	0.0111041	0.0111041	hypothetical protein	295	198	317	215	213	271
G372_RS0106730	0.412333	0.58374	0.084931	0.1036	5.39794	0.0141473	0.00460413	0.010375	0.0114954	0.0114954	RES domain-containing protein	249	237	285	213	166	193
G372_RS0103110	0.413209	0.584672	-0.16643	0.203395	6.21829	0.0579532	0.00214104	0.0599134	0.00977923	0.0599134	NADH-quinone oxidoreductase subunit A	576	590	399	453	357	724
G372_RS0100795	0.414037	0.585536	0.073774	0.0903197	6.11793	0.00337853	0.00234568	-0.000163487	0.00989081	0.00989081	DNA repair protein RecN	538	448	597	382	328	482
G372_RS0100670	0.415386	0.587134	-0.086313	0.105977	5.25403	0.00695482	0.00470936	0.00119043	0.0121372	0.0121372	DUF2782 domain-containing protein	204	195	212	181	159	199
G372_RS0101615	0.416236	0.588026	-0.0699579	0.0860523	6.41591	0.00581172	0.00145768	0.00397168	0.00964981	0.00964981	PilZ domain-containing protein	708	546	734	585	513	611
G372_RS0100210	0.417448	0.589428	0.146571	0.18076	3.83071	0.0354902	0.025165	0.0111416	0.0238464	0.0238464	hypothetical protein	63	44	59	28	35	56
G372_RS0107140	0.417676	0.58944	0.135328	0.166977	3.96918	0.0183769	0.019569	-0.0034655	0.0222527	0.0222527	DUF3185 domain-containing protein	67	50	73	46	42	44
G372_RS0103745	0.417998	0.589586	-0.0783564	0.0967483	5.72572	0.0130742	0.00312309	0.0109173	0.0105251	0.0109173	sulfurtransferase	334	258	409	275	268	317
G372_RS0111535	0.418493	0.589973	-0.136847	0.169148	5.74479	0.0399515	0.00349859	0.039418	0.0104805	0.039418	RNA helicase	344	294	338	255	211	502
G372_RS0111435	0.419475	0.591049	-0.116271	0.144019	4.359	0.0169403	0.012585	0.00352075	0.0185272	0.0185272	XRE family transcriptional regulator	98	66	84	70	55	105
G372_RS0103945	0.421782	0.593799	-0.234713	0.292173	2.82252	0.111285	0.0861848	0.0322627	0.0418628	0.0418628	TlpA family protein disulfide reductase	13	20	16	20	9	25
G372_RS0106105	0.42209	0.593799	-0.0901466	0.11229	5.09999	0.0157313	0.00585204	0.0107646	0.0130616	0.0130616	ribonuclease T	181	151	193	130	125	223
G372_RS0107985	0.4219	0.593799	0.0789725	0.0983311	5.62528	0.0113303	0.00371811	0.00810599	0.0107854	0.0107854	aldo/keto reductase	382	290	298	261	184	284
G372_RS0103580	0.42285	0.594245	0.0928058	0.115792	5.02051	0.00917388	0.0065134	0.00172411	0.0135983	0.0135983	dethiobiotin synthase	178	147	209	116	116	161
G372_RS0107215	0.422717	0.594245	0.0705279	0.0879712	6.31693	0.00429433	0.00191112	0.00159148	0.00969726	0.00969726	EAL domain-containing protein	716	512	710	494	409	546
G372_RS0111430	0.423314	0.594587	0.127153	0.158805	4.11895	0.0284273	0.017123	0.0123482	0.0207056	0.0207056	type II toxin-antitoxin system mRNA interferase toxin, RelE/StbE family	74	65	79	44	38	81
G372_RS0112765	0.423982	0.595214	-0.0781302	0.0977199	5.67798	0.0126623	0.00367754	0.00986124	0.0106462	0.0106462	DUF4440 domain-containing protein	334	310	295	239	249	340
G372_RS0104745	0.424286	0.59533	0.108179	0.135391	4.71495	0.0154008	0.0117935	0.00306895	0.0157027	0.0157027	zinc ribbon domain-containing protein	132	128	132	100	68	124
G372_RS0104270	0.427301	0.598037	0.11694	0.147314	4.34916	0.0100056	0.01394	-0.00656117	0.018612	0.018612	sigma-54-dependent Fis family transcriptional regulator	101	79	94	64	49	88
G372_RS0105575	0.427773	0.598037	-0.098663	0.124416	4.86352	0.0120547	0.00855043	0.00286756	0.0146687	0.0146687	CBS domain-containing protein	156	117	140	103	106	165
G372_RS0108865	0.42695	0.598037	-0.0958256	0.120623	5.98952	0.0202147	0.00239093	0.0194339	0.0100581	0.0194339	HDOD domain-containing protein	512	327	453	401	359	368
G372_RS0109745	0.427599	0.598037	0.079753	0.100532	5.48966	0.00949838	0.00398205	0.00550572	0.0111781	0.0111781	potassium transporter	324	260	261	189	183	262
G372_RS0110300	0.427359	0.598037	-0.0692984	0.0873085	6.36815	0.0081804	0.00176625	0.00665839	0.0096679	0.0096679	ParA family protein	657	550	681	463	489	701
G372_RS0111930	0.427004	0.598037	0.0698948	0.0879922	7.16057	0.0107567	0.000790226	0.0108237	0.0105105	0.0108237	DNA polymerase III subunit alpha	1533	1249	1709	1246	969	1151
G372_RS0112395	0.426806	0.598037	-0.191555	0.24105	4.80872	0.0807341	0.00788507	0.0792726	0.0150399	0.0792726	HIT domain-containing protein	96	106	185	113	134	116
G372_RS0107005	0.429014	0.599382	-0.123484	0.156135	5.7633	0.0338284	0.00290136	0.0336661	0.0104394	0.0336661	ADP-forming succinate--CoA ligase subunit beta	358	328	314	233	264	455
G372_RS0108805	0.429182	0.599382	0.113095	0.143051	7.84914	0.0283934	0.000365185	0.0303302	0.0124959	0.0303302	YeeE/YedE family protein	3159	3194	2732	2009	1623	3154
G372_RS0107995	0.429666	0.599747	0.10579	0.133952	4.65243	0.0246752	0.0107508	0.0158964	0.0161638	0.0161638	DUF2058 domain-containing protein	116	123	129	73	75	128
G372_RS0111810	0.431111	0.601451	0.13133	0.166812	3.95591	0.0119458	0.0193409	-0.0108765	0.0223984	0.0223984	NAD(P)H:quinone oxidoreductase	69	47	72	43	39	49
G372_RS0104280	0.432039	0.602434	0.0879517	0.11194	5.15329	0.00479178	0.00607608	-0.00298716	0.0127196	0.0127196	EamA/RhaT family transporter	225	179	201	152	117	183
G372_RS0102370	0.432425	0.60249	-0.073496	0.0936196	7.94024	0.00628598	0.000334837	0.00549702	0.0128121	0.0128121	preprotein translocase subunit SecA	3429	2688	2971	2812	2026	3139
G372_RS13815	0.43296	0.60249	-0.0759458	0.0968527	5.69742	0.00472946	0.00347502	0.000273901	0.0105957	0.0105957	hypothetical protein	318	297	344	282	223	340
G372_RS0108930	0.433201	0.60249	0.0739795	0.0943947	5.87676	0.00215334	0.00314009	-0.00250078	0.0102254	0.0102254	MotA/TolQ/ExbB proton channel family protein	441	367	431	315	258	360
G372_RS0109885	0.433162	0.60249	0.096727	0.123409	5.79851	0.0210826	0.00313376	0.0197109	0.0103664	0.0197109	heavy metal transporter	377	314	482	307	260	280
G372_RS0109940	0.432699	0.60249	0.126146	0.160782	4.82787	0.0357948	0.00740669	0.0313694	0.0149088	0.0313694	hypothetical protein	149	147	147	88	78	168
G372_RS0102475	0.434178	0.603536	-0.0671854	0.0859079	6.42939	0.0077049	0.00142382	0.0065146	0.00964644	0.00964644	penicillin-binding protein activator	677.518	653.222	670.384	569.535	451.322	739.74
G372_RS0104820	0.435523	0.605094	-0.0700799	0.0898719	7.56817	0.00500921	0.000514093	0.00390572	0.0116014	0.0116014	GTPase HflX	2493	1749	2067	1822	1481	2159
G372_RS0108395	0.436816	0.606576	-0.0728891	0.0937382	7.94376	0.00956724	0.000355699	0.00961105	0.0128246	0.0128246	2,3-bisphosphoglycerate-independent phosphoglycerate mutase	3417	2461	3294	2923	2257	2737
G372_RS0103595	0.437363	0.607022	-0.419081	0.539597	6.57138	0.402087	0.00176898	0.434979	0.00966326	0.434979	50S ribosomal protein L31	875	789	388	451	467	2344
G372_RS13490	0.438063	0.60768	-0.155314	0.200284	3.57562	0.0219132	0.0329242	-0.0145787	0.0272463	0.0272463	preprotein translocase SecA	42	27	42	29	30	46
G372_RS0109625	0.438555	0.608048	-0.117343	0.151482	5.21727	0.0316669	0.00549132	0.0289287	0.0123383	0.0289287	acetyl-CoA carboxylase biotin carboxyl carrier protein	169	209	204	148	150	242
G372_RS0110750	0.439096	0.608484	-0.115171	0.148854	4.28885	0.021072	0.0140971	0.00726873	0.0191392	0.0191392	CPBP family intramembrane metalloprotease	82	59	91	68	49	98
G372_RS0108585	0.439443	0.608652	0.086727	0.112176	5.18263	0.0173566	0.00537237	0.0135028	0.0125403	0.0135028	chromate transporter	208	192	221	133	119	225
G372_RS0112495	0.43987	0.608928	-0.271168	0.351066	4.25948	0.169956	0.0161184	0.168752	0.0194005	0.168752	RNA methyltransferase	95	62	54	59	40	160
G372_RS0102930	0.440447	0.609354	-0.128483	0.166549	7.9453	0.0382388	0.000442246	0.0411658	0.0128301	0.0411658	formate dehydrogenase	3295	2318	3352	2230	1996	4430
G372_RS0109045	0.440631	0.609354	-0.0895866	0.116176	5.02249	0.0121298	0.00666071	0.00549193	0.0135846	0.0135846	glycosyltransferase family 1 protein	147	158	180	134	123	174
G372_RS0109540	0.44149	0.610228	0.0657505	0.0854258	6.56057	0.00487018	0.00128794	0.00317861	0.00965841	0.00965841	prephenate dehydrogenase/arogenate dehydrogenase family protein	869	750	824	662	507	688
G372_RS0108015	0.442925	0.611897	-0.0689731	0.0898949	6.12202	0.00524215	0.00223585	0.00253285	0.0098858	0.0098858	hypothetical protein	546	398	541	394	390	493
G372_RS0111410	0.443438	0.612291	-0.266061	0.347156	4.24891	0.165857	0.0158865	0.16489	0.0194953	0.16489	hypothetical protein	90	46	75	37	86	114
G372_RS0109970	0.444928	0.614032	0.117275	0.153522	4.42887	0.0324087	0.0135847	0.0217687	0.0179353	0.0217687	ferredoxin	124	95	81	80	51	86
G372_RS0100860	0.446466	0.615839	0.174241	0.228867	6.95305	0.0719643	0.00103731	0.0775331	0.010087	0.0775331	30S ribosomal protein S13	1264	1290	1259	711	567	1581
G372_RS0105250	0.447815	0.617383	0.149488	0.196937	4.86996	0.053245	0.00736124	0.050815	0.0146258	0.050815	site-specific integrase	159	124	192	135	104	90
G372_RS0107050	0.44996	0.620022	-0.0823993	0.109069	5.30297	0.0163121	0.00495522	0.0128887	0.0118935	0.0128887	alpha/beta hydrolase	235	175	239	165	195	205
G372_RS0101150	0.450459	0.620073	0.102144	0.135353	4.50142	0.0110759	0.0101411	-0.00020877	0.0173396	0.0173396	gamma-glutamyl-gamma-aminobutyrate hydrolase	116	91	110	76	56	105
G372_RS0102235	0.450449	0.620073	0.769659	1.01986	2.7171	1.42586	0.099359	1.46083	0.0446079	1.46083	5S ribosomal RNA rrf	9	8	186	14	8	6
G372_RS0112175	0.450915	0.620383	0.0778938	0.103322	5.6247	0.0146309	0.00420134	0.011812	0.010787	0.011812	hypothetical protein	340	252	384	239	231	247
G372_RS13950	0.451407	0.620742	-0.572259	0.7599	2.88451	0.791181	0.0775794	0.788592	0.0403416	0.788592	hypothetical protein	3	31	29	23	19	21
G372_RS0109825	0.451862	0.62105	-0.137391	0.182625	4.90269	0.045685	0.00701728	0.0430103	0.0144075	0.0430103	4-hydroxybenzoate octaprenyltransferase	171	130	122	110	93	210
G372_RS0101395	0.452798	0.622019	-0.0778076	0.103639	5.78958	0.0147054	0.00282699	0.0132845	0.0103843	0.0132845	L-aspartate oxidase	360	284	418	329	280	307
G372_RS0112215	0.454026	0.623387	0.0701905	0.0937475	5.90098	0.0102245	0.00299629	0.00793688	0.0101866	0.0101866	hypothetical protein	481.609	337.58	458.812	344.834	281	326.572
G372_RS0103865	0.454331	0.623487	-0.084951	0.113538	5.1085	0.00877026	0.00633071	0.00192585	0.0130057	0.0130057	cytochrome b	201	135	201	161	134	171
G372_RS0104345	0.454639	0.623591	-0.137089	0.183347	3.71769	0.00889011	0.0251496	-0.0210845	0.0252744	0.0252744	cation:proton antiporter	45	39	43	37	36	45
G372_RS0108665	0.456868	0.626329	0.0670985	0.0901845	6.10632	0.00877996	0.00229465	0.00699198	0.00990521	0.00990521	MBL fold metallo-hydrolase	531	487	532	361	376	434
G372_RS0112895	0.45882	0.628684	0.109974	0.148454	4.59356	0.0300747	0.0103965	0.0226616	0.0166117	0.0226616	hypothetical protein	146	113	94	74	71	111
G372_RS0103570	0.459602	0.629434	0.109699	0.148341	8.99033	0.0300163	0.000122358	0.0328853	0.0174741	0.0328853	fructose-bisphosphate aldolase class II	8243	8313	12283	7726	5932	6922
G372_RS0104680	0.460145	0.629858	-0.0834348	0.112962	5.12586	0.00475778	0.00624745	-0.00291073	0.0128933	0.0128933	methyltransferase domain-containing protein	199	144	201	150	139	186
G372_RS0101365	0.460626	0.630156	-0.171826	0.232885	3.3425	0.0739395	0.0376553	0.0436975	0.030959	0.0436975	hypothetical protein	30	33	23	21	32	30
G372_RS0103225	0.461302	0.630156	-0.107511	0.145936	4.41127	0.0169142	0.0138631	0.00294518	0.0180827	0.0180827	cell division protein ZapB	80	79	102	79	73	81
G372_RS0108895	0.460879	0.630156	0.153433	0.208073	4.36373	0.0590159	0.0131457	0.051796	0.0184865	0.051796	hypothetical protein	98	71	119	87	57	55
G372_RS0113340	0.46129	0.630156	-0.0975536	0.132415	4.62817	0.00849308	0.009954	-0.00290641	0.0163467	0.0163467	type III pantothenate kinase	118	92	116	83	86	124
G372_RS0107270	0.461766	0.63047	0.0634982	0.0862816	6.44937	0.00227474	0.00152383	-0.000192415	0.00964293	0.00964293	carbon-nitrogen hydrolase family protein	828	629	736	540	467	658
G372_RS0105990	0.463015	0.631534	-0.0890793	0.12138	4.83877	0.0177604	0.00726461	0.0119602	0.0148349	0.0148349	DUF1244 domain-containing protein	136	145	122	121	98	139
G372_RS0110945	0.462986	0.631534	-0.0729978	0.0994603	5.88111	0.0134694	0.00286492	0.0119736	0.0102183	0.0119736	lecithin--cholesterol acyltransferase	383	369	401	362.502	303	336.529
G372_RS0104920	0.463952	0.632491	-0.157222	0.21468	3.34328	0.0433087	0.0381858	0.00668057	0.0309455	0.0309455	oxidase	29	26	31	19	26	40
G372_RS0104435	0.46631	0.635383	-0.0933509	0.128142	5.56761	0.0223188	0.00358781	0.0210428	0.0109444	0.0210428	hypothetical protein	253	291	291	233	187	341
G372_RS0112790	0.466642	0.635513	-0.0920746	0.126484	4.75063	0.00562138	0.00855093	-0.00470336	0.0154464	0.0154464	GGDEF domain-containing protein	126	113	129	99	95	135
G372_RS0102255	0.467254	0.636025	0.441089	0.606764	8.43075	0.500163	0.000256751	0.551987	0.0147487	0.551987	16S ribosomal RNA	9030	2266	12617	7174	2098	2392
G372_RS0101380	0.467813	0.636141	-0.204641	0.281858	8.06362	0.107896	0.000332269	0.118834	0.0132616	0.118834	MBL fold metallo-hydrolase	3215	2399	4223	5252	2067	2904
G372_RS0112300	0.46758	0.636141	0.351657	0.484094	1.6443	0.104593	0.263899	-0.179531	0.087622	0.087622	hypothetical protein	7	6	6	2	4	5
G372_RS13595	0.468124	0.636241	-0.0666778	0.0919015	5.93117	0.002848	0.00252813	-0.000635352	0.0101407	0.0101407	hypothetical protein	457	344	423	365	283	412
G372_RS0105690	0.468391	0.636283	0.10296	0.141995	4.40981	0.0182414	0.0121489	0.00667761	0.018095	0.018095	PEP-CTERM sorting domain-containing protein	97	101	90	62	60	91
G372_RS0101955	0.469412	0.637347	-0.0787454	0.108849	5.20828	0.0126286	0.00538254	0.00807788	0.0123897	0.0123897	exclusion protein FxsA	188	191	207	180	154	178
G372_RS0112980	0.46967	0.637375	0.0929167	0.128513	5.25947	0.0224086	0.00615713	0.0186161	0.0121087	0.0186161	hypothetical protein	284	152	260	166	144	186
G372_RS0102520	0.47124	0.639184	0.0653316	0.0906801	6.80571	0.0111479	0.00117918	0.0111552	0.00986693	0.0111552	PDZ domain-containing protein	1035	875	1237	872	668	828
G372_RS0108965	0.47176	0.639566	-0.0963361	0.133871	6.55272	0.02429	0.0014849	0.0253974	0.00965524	0.0253974	enoyl-ACP reductase	808	724	703	548	534	983
G372_RS0104410	0.47333	0.641371	-0.201558	0.281085	3.01751	0.106998	0.0521804	0.066333	0.0372945	0.066333	flagellar biosynthetic protein FliQ	14	30	19	20	17	23
G372_RS0110070	0.473713	0.641566	-0.0925382	0.129162	4.63955	0.00657212	0.00876353	-0.00375963	0.0162606	0.0162606	hypothetical protein	129	87	117	92	81	122
G372_RS0108740	0.474642	0.642501	-0.0805802	0.112708	5.1065	0.0162386	0.00603583	0.0118274	0.0130188	0.0130188	NAD(P)H:quinone oxidoreductase	177	164	188	145	158	159
G372_RS0100845	0.475807	0.643753	0.0845646	0.118593	8.3458	0.0190226	0.000238633	0.020858	0.0143842	0.020858	DNA-directed RNA polymerase subunit alpha	4638	4660	5423	4252	3061	3660
G372_RS0108350	0.476436	0.644279	-0.0613105	0.0861046	6.5664	0.00638537	0.00146003	0.00511207	0.00966097	0.00966097	inorganic phosphate transporter	769	751	782	619	583	788
G372_RS0106705	0.477244	0.644723	-0.133459	0.187774	3.63596	0.0277047	0.0265052	0.00144644	0.0263837	0.0263837	DUF99 domain-containing protein	51	29	40	30	31	50
G372_RS0111225	0.47705	0.644723	-0.137039	0.192727	3.89765	0.0502063	0.0212375	0.0344779	0.0230554	0.0344779	phenylacetate--CoA ligase family protein	70	31	60	43	37	65
G372_RS13540	0.47803	0.64546	0.162867	0.22956	3.20469	0.0129871	0.04558	-0.0392933	0.0334666	0.0334666	plasmid stabilization protein	32	26	30	21	18	21
G372_RS0101310	0.479487	0.646778	0.0623062	0.0881117	6.28848	0.0102279	0.00192783	0.00940133	0.00971767	0.00971767	hypothetical protein	630	572	655	543	371	509
G372_RS0111115	0.479282	0.646778	0.107282	0.151644	4.29233	0.0224194	0.0153856	0.00832265	0.0191084	0.0191084	TetR/AcrR family transcriptional regulator	75	83	100	67	55	64
G372_RS0102605	0.480107	0.647289	-0.0651071	0.0922026	5.93213	0.0102255	0.00261271	0.0085796	0.0101393	0.0101393	protoheme IX farnesyltransferase	462	318	455	310	335	410
G372_RS0100800	0.480708	0.647462	-0.0667004	0.0945886	5.84615	0.0120711	0.00312631	0.0102942	0.0102775	0.0102942	NAD(+) kinase	362	334	426	292	252	448
G372_RS0103825	0.480933	0.647462	-0.090794	0.128822	5.72919	0.0223872	0.00318548	0.0217072	0.0105168	0.0217072	hypothetical protein	330	273	388	330	266	274
G372_RS0111315	0.480977	0.647462	-0.122107	0.173267	3.83649	0.0246052	0.0212554	0.00390988	0.0237766	0.0237766	PEP-CTERM sorting domain-containing protein	60	45	41	40	35	60
G372_RS0111995	0.481199	0.647462	0.115694	0.16425	4.91297	0.0363894	0.0075162	0.0329511	0.014338	0.0329511	2-C-methyl-D-erythritol 2,4-cyclodiphosphate synthase	164	123	203	112	124	109
G372_RS0102555	0.482795	0.649285	-0.0745029	0.106158	5.31174	0.0091581	0.00505116	0.00431496	0.011853	0.011853	alanine:cation symporter family protein	235	194	224	165	156	260
[truncated: 718 more rows]

## Sheet: ALM2(T)(0.1mM vs. 0mM As(III))
Locus tag	P-value	q-value	b-value	Ste of b-value	Mean of obs	Var of obs	Tech var	Sigma sq	Smooth sigma sq	Final sigma sq	Protein product	Raw read counts
												ALM2(T) (0.1 mM As(III)) (1)	ALM2(T) (0.1 mM As(III)) (2)	ALM2(T) (0.1 mM As(III)) (3)	ALM2(T) (0.1 mM As(III)) (1)	ALM2(T) (0.1 mM As(III)) (2)	ALM2(T) (0.1 mM As(III)) (3)
F816_RS0102620	6.25339e-12	1.52645e-08	-0.459312	0.0668211	7.33219	0.0686349	0.000662047	0.00601888	0.00603554	0.00603554	prepilin-type cleavage/methylation domain-containing protein	1005	1401	1502	1572	1760	2177
F816_RS0105550	1.58026e-08	1.92871e-05	-0.386984	0.068461	6.95672	0.0505512	0.000862804	0.00616756	0.00581411	0.00616756	methyl-accepting chemotaxis protein	743	932	1103	1185	1245	1187
F816_RS0102550	7.59518e-07	0.000617994	-0.336389	0.0680193	6.74068	0.0344539	0.00114765	-0.000514316	0.00579229	0.00579229	methyl-accepting chemotaxis protein	652	777	850.436	840	955	1058
F816_RS0101175	2.21938e-06	0.00135437	-0.408397	0.086299	5.48353	0.0533407	0.00421173	-8.13354e-05	0.00695953	0.00695953	methyl-accepting chemotaxis protein	173	215	238	266	258	316
F816_RS0106970	6.3427e-06	0.00309651	0.438772	0.0971888	7.99505	0.0690909	0.000356961	0.0138115	0.00667453	0.0138115	peroxiredoxin	3239	4195	4377	1870	2067	2960
F816_RS13950	0.000299341	0.0888175	0.243805	0.0674264	7.63459	0.0228287	0.000511249	0.00573432	0.00630823	0.00630823	sigma-54-dependent Fis family transcriptional regulator	2252	2458	2719	1731	1622	1851
F816_RS0101275	0.000355696	0.0888175	-0.286507	0.080233	5.72812	0.0286187	0.0031869	0.001804	0.00646909	0.00646909	flagellin	226	293	335	290	371	350
F816_RS0101545	0.00041911	0.0888175	-0.337861	0.0957724	5.0481	0.0354064	0.00600761	-0.00455596	0.00775093	0.00775093	hypothetical protein	121	138	159	160	177	186
F816_RS0102010	0.000473014	0.0888175	0.355629	0.101737	4.97173	0.0459295	0.00758023	0.00240454	0.00794526	0.00794526	glycosyl transferase family 2	151	182	218	97	107	142
F816_RS0102330	0.000365405	0.0888175	0.247163	0.0693522	8.24523	0.0221622	0.000259056	0.00453514	0.00695553	0.00695553	MBL fold metallo-hydrolase	4071	4598	5049	3066	3370	3127
F816_RS0104965	0.000340858	0.0888175	0.454228	0.126805	7.58194	0.0811924	0.000492107	0.0236273	0.00625815	0.0236273	hypothetical protein	2229	2913	2714	1640	1532	1288
F816_RS0107855	0.000331552	0.0888175	-0.249068	0.0693916	6.71859	0.0243887	0.00120193	0.00602087	0.0057937	0.00602087	hypothetical protein	597	827	931	758	982	936
F816_RS0103940	0.000464046	0.0888175	-0.282621	0.0807329	6.30756	0.0317838	0.0019337	0.007843	0.00590072	0.007843	tRNA-Val	387	601	547	572	630	592
F816_RS0100660	0.00077531	0.110798	-0.227945	0.0678114	7.74663	0.0208325	0.000479989	0.00607599	0.00641759	0.00641759	chemotaxis protein CheA	1745	2352	2529	2310	2684	2381
F816_RS0101745	0.000746007	0.110798	0.225591	0.0668996	7.25882	0.0190931	0.000734909	0.0040472	0.00597842	0.00597842	DUF2892 domain-containing protein	1476	1837	1749	1194	1155	1254
F816_RS0104860	0.000862415	0.110798	0.28959	0.0869133	5.44739	0.0322475	0.00430149	0.00455943	0.00702939	0.00702939	electron transport complex subunit RsxA	258	301	292	196	182	191
F816_RS0111955	0.000668738	0.110798	0.23296	0.0684757	8.04118	0.018815	0.000308815	0.00285852	0.00672458	0.00672458	hypothetical protein	3442	3677	3963	2412	2602	2851
F816_RS0112945	0.000838368	0.110798	0.248125	0.0742933	6.09906	0.0199039	0.0022456	-0.000453026	0.00603365	0.00603365	hypothetical protein	477	565	560	338	392	388
F816_RS0113350	0.000700476	0.110798	-0.224939	0.0663655	7.2126	0.0164381	0.000661297	0.000912236	0.00594528	0.00594528	methyl-accepting chemotaxis protein	1143	1273	1443	1319	1458	1539
F816_RS0111690	0.000947969	0.1157	-0.22676	0.0686003	8.04229	0.0204545	0.000333203	0.00595236	0.0067258	0.0067258	50S ribosomal protein L16	2527	3026	3302	3253	3482	3159
F816_RS0100555	0.0020301	0.225249	-0.293414	0.0950855	5.1022	0.0313474	0.00592841	0.000971302	0.00763349	0.00763349	flagellar hook-basal body complex protein FliE	133	157	160	183	165	192
F816_RS0107860	0.00201138	0.225249	-0.388172	0.125681	5.4031	0.0641581	0.00441605	0.0192775	0.00710957	0.0192775	hypothetical protein	139	199	259	224	295	250
F816_RS0104200	0.00244802	0.25981	-0.28154	0.0929268	6.82459	0.0341419	0.00105219	0.0119009	0.00579066	0.0119009	hypothetical protein	629	1005	952	828	1012	1200
F816_RS14680	0.0027234	0.265913	-0.226074	0.0754248	6.07318	0.0206027	0.00247852	0.00410873	0.00605485	0.00605485	50S ribosomal protein L36	336	482	423	437	435	510
F816_RS0113110	0.00266641	0.265913	-0.21362	0.0711169	6.50951	0.0180322	0.00175905	0.00366855	0.00582738	0.00582738	penicillin-binding protein 2	601	616	699	608	726	799
F816_RS0104865	0.00302532	0.273511	0.322086	0.108624	4.7431	0.0377805	0.00901051	-0.000687206	0.0086882	0.0086882	electron transport complex subunit RsxB	113	170	149	90	92	94
F816_RS0105180	0.00300468	0.273511	-0.330637	0.111428	4.65676	0.0369379	0.00960878	-0.00443163	0.00901562	0.00901562	phosphatidylglycerophosphatase A	77	94	114	107	126	119
F816_RS0100670	0.00339501	0.295972	-0.22067	0.0753268	6.00708	0.0167219	0.0023974	0.000244157	0.0061138	0.0061138	flagellar motor protein motC	332	393	434	419	421	447
F816_RS0103155	0.00409411	0.32281	0.229472	0.0799325	5.91594	0.0234642	0.00290682	0.00667698	0.00620667	0.00667698	hypothetical protein	375	458	493	305	346	289
F816_RS0107540	0.00409959	0.32281	-0.502053	0.174907	3.95513	0.112328	0.0213784	0.0245103	0.0138135	0.0245103	glycine cleavage system protein H	32	61	39	49	74	69
F816_RS0110620	0.00407097	0.32281	-0.193089	0.0672172	7.38044	0.0136513	0.000701535	0.00238144	0.00607569	0.00607569	sulfur oxidation c-type cytochrome SoxX	1222	1724	1730	1446	1752	1843
F816_RS0113185	0.00424955	0.324161	0.2393	0.0837002	5.59079	0.0236544	0.00376895	0.00432475	0.00673964	0.00673964	ferric iron uptake transcriptional regulator	291	340	327	194	212	275
F816_RS0100610	0.00465274	0.335352	-0.343344	0.121317	4.48472	0.0483727	0.0122927	0.00396626	0.00978391	0.00978391	flagellar biosynthetic protein FliP	63	91	84	108	92	98
F816_RS0101790	0.00467102	0.335352	-0.216758	0.0766232	5.95499	0.0190785	0.00264145	0.00358759	0.00616522	0.00616522	transcriptional regulator	317	389	395	390	443	388
F816_RS0103005	0.00539678	0.376387	0.259323	0.0932032	5.18725	0.0215701	0.00555773	-0.00381333	0.00747251	0.00747251	phosphoglycerate mutase	195	221	230	137	146	163
F816_RS14370	0.00683209	0.427618	-0.260015	0.0961269	5.42293	0.0313709	0.00463323	0.00922733	0.00707439	0.00922733	IS481 family transposase	166	202	275	222	267	244
F816_RS0107810	0.00675673	0.427618	0.182687	0.0674469	7.67919	0.0148679	0.000472328	0.00559709	0.0063513	0.0063513	copper chaperone PCu(A)C	2303	2452	2780	1540	1964	2153
F816_RS0108285	0.00677729	0.427618	-0.180238	0.0665674	7.11476	0.0150631	0.000715187	0.00593165	0.00588371	0.00593165	carbon storage regulator	967	1271	1362	1087	1467	1294
F816_RS0111515	0.00661681	0.427618	0.40939	0.150758	3.96796	0.0655382	0.0204158	-0.00134311	0.0136764	0.0136764	23S rRNA (pseudouridine(1915)-N(3))-methyltransferase RlmH	62	66	77	37	34	52
F816_RS0106515	0.00767822	0.468563	-0.196093	0.073556	6.24415	0.014305	0.0021816	0.00127998	0.00593413	0.00593413	GGDEF domain-containing protein	445	478	563	486	567	562
F816_RS0104195	0.00854444	0.479098	-0.229017	0.0870864	6.65782	0.0248354	0.00131375	0.0100623	0.00579957	0.0100623	hypothetical protein	560	868	812	686	822	999
F816_RS0106570	0.00841365	0.479098	-0.196967	0.0747503	6.10056	0.0152909	0.00234894	0.00221614	0.00603246	0.00603246	methyl-accepting chemotaxis protein	373	426	489	447	490	460
F816_RS0108130	0.0086218	0.479098	-0.339486	0.129245	4.2512	0.046228	0.0138691	0.000696793	0.0111872	0.0111872	NADH dehydrogenase subunit M	56	70	61	83	73	79
F816_RS0110850	0.00863593	0.479098	-0.181603	0.0691522	6.55256	0.0103826	0.00135582	-0.000745004	0.00581722	0.00581722	argininosuccinate synthase	588	696	755	664	754	764
F816_RS0108070	0.00910747	0.49403	-0.175705	0.0673717	7.09549	0.0116503	0.000935301	0.00205055	0.00587311	0.00587311	CbbQ/NirQ/NorQ/GpvN family protein	920	1276	1355	1111	1312	1327
F816_RS0102675	0.00956531	0.507585	0.197401	0.0761823	9.39915	0.0185413	7.56904e-05	0.00848834	0.00862993	0.00862993	cytochrome c	11309	14396	17176	9514	11542	10108
F816_RS0104560	0.0105805	0.538064	0.174066	0.0680943	6.73948	0.00986743	0.0011629	-0.000190785	0.00579235	0.00579235	lipoyl synthase	819	1006	1121	678	751	772
F816_RS0109265	0.0105638	0.538064	-0.171414	0.0670422	7.44578	0.00945186	0.000609295	0.000186987	0.0061327	0.0061327	twitching motility protein PilT	1398	1775	1846	1663	1743	1897
F816_RS0100655	0.013926	0.558964	-0.17018	0.0692023	6.57643	0.0114779	0.00137109	0.00211581	0.00581235	0.00581235	protein phosphatase CheZ	587	751	766	734	711	774
F816_RS0101050	0.0122371	0.558964	-0.168728	0.0673504	6.8907	0.012945	0.00100611	0.0044991	0.00579801	0.00579801	bifunctional diguanylate cyclase/phosphodiesterase	785	1103	1004	957	1070	1011
F816_RS0101270	0.0139684	0.558964	-0.214962	0.0874514	6.94447	0.0230399	0.00106063	0.010411	0.0058105	0.010411	flagellar biosynthesis protein FlaG	731	1160	1124	921	1095	1293
F816_RS0102205	0.0134339	0.558964	-0.165016	0.0667524	7.08082	0.0121028	0.000818409	0.00409881	0.00586542	0.00586542	flagellar hook-associated protein FlgK	1002	1206	1280	1234	1204	1226
F816_RS0102305	0.0133722	0.558964	-0.251498	0.101669	5.84936	0.0313793	0.00292145	0.0125834	0.00628325	0.0125834	phenylalanine--tRNA ligase subunit alpha	248	398	341	369	335	416
F816_RS0103900	0.012335	0.558964	0.450965	0.180212	3.6151	0.0936924	0.0302791	0.0105731	0.0184355	0.0184355	bifunctional DNA-formamidopyrimidine glycosylase/DNA-(apurinic or apyrimidinic site) lyase	49	42	56	24	23	38
F816_RS0104540	0.0115226	0.558964	0.342299	0.135487	4.21112	0.0523164	0.0160524	0.00540497	0.0114826	0.0114826	hypothetical protein	77	94	82	57	45	59
F816_RS0107000	0.0116455	0.558964	0.198288	0.0786012	9.69754	0.0164463	7.26707e-05	0.0057409	0.00919455	0.00919455	ribonucleoside-diphosphate reductase subunit alpha	15463	19965	22201	13974	13930	13939
F816_RS0108025	0.0120525	0.558964	-0.178433	0.0710717	6.3972	0.0126566	0.00171411	0.00216732	0.00586267	0.00586267	carboxysome peptide A	512	649	586	536	641	695
F816_RS0108030	0.0124104	0.558964	-0.2767	0.110669	6.65279	0.037666	0.00119607	0.0171753	0.0058002	0.0171753	carboxysome peptide B	547	803	824	835	948	753
F816_RS0108055	0.0132847	0.558964	-0.169454	0.0684374	6.60554	0.0110998	0.00121841	0.00188834	0.0058071	0.0058071	transcriptional coactivator/pterin dehydratase	589	762	822	661	746	893
F816_RS0109920	0.0127713	0.558964	0.167462	0.0672515	6.92886	0.0124384	0.000977839	0.00405389	0.0058063	0.0058063	tRNA uridine-5-carboxymethylaminomethyl(34) synthesis enzyme MnmG	919	1288	1364	791	857	1034
F816_RS0111960	0.0137098	0.558964	0.176319	0.0715353	8.3184	0.0154672	0.000289858	0.00738609	0.00704233	0.00738609	hypothetical protein	3964	4757	5613	3002	3424	4354
F816_RS0108310	0.0148675	0.569942	0.298362	0.122501	5.86602	0.0428481	0.0162463	0.00393135	0.00626337	0.00626337	hypothetical protein	380.54	433.908	489.506	303.947	234.93	331.459
F816_RS0111075	0.0149432	0.569942	-0.316013	0.129846	5.40278	0.0501913	0.0046586	0.0206314	0.00711012	0.0206314	Fe(3+) ABC transporter substrate-binding protein	174	202	227	173	270	317
F816_RS0111170	0.0147316	0.569942	0.162445	0.0666055	7.26227	0.0128429	0.000673459	0.00548446	0.00598099	0.00598099	biotin synthase BioB	1331	1753	1868	1265	1192	1274
F816_RS0102300	0.0162988	0.57848	-0.166937	0.0694945	6.46726	0.0118275	0.0014051	0.00292878	0.00583912	0.00583912	phenylalanine--tRNA ligase subunit beta	551	633	701	654	669	662
F816_RS0102670	0.0163945	0.57848	0.166253	0.0692718	8.21503	0.0138988	0.000277551	0.00673088	0.00692033	0.00692033	hypothetical protein	3510	4412	4937	2766	3719	3239
F816_RS0103595	0.0165889	0.57848	-0.176525	0.0736841	6.13917	0.0140621	0.00214113	0.0037511	0.00600289	0.00600289	homoserine O-succinyltransferase	375	532	451	427	483	532
F816_RS0108020	0.0160782	0.57848	-0.163456	0.0679046	7.7948	0.00926122	0.000450734	0.00110665	0.00646581	0.00646581	carboxysome shell carbonic anhydrase	1978	2636	2534	2296	2586	2608
F816_RS0109190	0.0165363	0.57848	-0.167514	0.0698891	8.32956	0.00876772	0.000270978	0.000165778	0.00705576	0.00705576	chemotaxis protein	3383	4244	4551	3793	4316	4735
F816_RS0113845	0.0163275	0.57848	-0.218886	0.0911453	7.79185	0.0243423	0.000446182	0.012015	0.00646284	0.012015	hypothetical protein	1779	2376	2851	2239	2955	2521
F816_RS0107430	0.0174321	0.599322	0.209118	0.0879586	5.42444	0.0194279	0.00453341	0.00335249	0.00707167	0.00707167	LLM class flavin-dependent oxidoreductase	253	284	261	176	207	197
F816_RS0111030	0.0180257	0.611121	0.169903	0.0718379	6.3422	0.012838	0.00185612	0.00336627	0.00588491	0.00588491	hypothetical protein	498	731	765	436	505	545
F816_RS0111970	0.0184448	0.616765	0.283531	0.120315	4.46722	0.0375172	0.0118409	0.00490953	0.00987274	0.00987274	hypothetical protein	108	99	110	69	65	80
F816_RS0100590	0.0234776	0.627192	-0.318024	0.140373	5.56851	0.0539872	0.00418535	0.0253714	0.0067859	0.0253714	hypothetical protein	242	254	213	312	272	288
F816_RS0100595	0.0238955	0.627192	-0.305413	0.13521	6.02164	0.0499211	0.00245908	0.0249634	0.00610022	0.0249634	flagellar motor switch protein FliM	380	395	347	468	484	413
F816_RS0100995	0.0202559	0.627192	0.219967	0.094749	6.76023	0.0252885	0.00111372	0.0123523	0.00579135	0.0123523	acyl-carrier-protein] S-malonyltransferase	778	1178	1149	675	650	890
F816_RS0101120	0.020428	0.627192	-0.160553	0.0692518	6.57445	0.0104076	0.00138099	0.00196211	0.00581273	0.00581273	hypothetical protein	651	706	741	690	743	772
F816_RS0101350	0.0204929	0.627192	-0.364356	0.15724	3.87507	0.0564464	0.0223623	-0.00158742	0.0147242	0.0147242	iron ABC transporter permease	29	54	47	50	55	58
F816_RS0102065	0.0207474	0.627192	1.5257	0.659748	1.28956	1.22065	0.223173	0.429729	0.243799	0.429729	universal stress protein	9	10	5	2	0	3
F816_RS0102275	0.0214953	0.627192	-0.172286	0.0749342	6.05366	0.0126424	0.00235117	0.00232084	0.00607153	0.00607153	flagellar protein FlgN	322	443	491	403	464	451
F816_RS0103725	0.0232381	0.627192	0.20404	0.0899055	5.68608	0.0221893	0.00333483	0.00878967	0.00654748	0.00878967	arsenate reductase (glutaredoxin)	328	346	360	218	232	314
F816_RS0103860	0.019827	0.627192	0.171884	0.0737822	6.31582	0.0153958	0.00171748	0.00644824	0.00589681	0.00644824	GMP synthase	620	598	696	419	494	534
F816_RS0104255	0.0228089	0.627192	0.203184	0.0892483	10.8796	0.0134759	2.06442e-05	0.00134273	0.0119272	0.0119272	CoB--CoM heterodisulfide reductase iron-sulfur subunit A family protein	52198	63717	71991	42380	46158	47750
F816_RS0106155	0.0212688	0.627192	-0.15844	0.0687921	6.62444	0.00846278	0.00129442	-0.000129715	0.00580411	0.00580411	histidine--tRNA ligase	597	806	825	705	775	839
F816_RS0106665	0.023007	0.627192	-0.445831	0.196115	3.52962	0.105783	0.0300414	0.02765	0.0199544	0.02765	class I SAM-dependent methyltransferase	29	34	23	38	49	34
F816_RS0107100	0.0237239	0.627192	0.404872	0.179022	6.33651	0.0876351	0.00167204	0.0464014	0.00588741	0.0464014	hypothetical protein	453	909	946	339	497	492
F816_RS0107815	0.0219345	0.627192	0.153846	0.0671376	7.00088	0.00937626	0.00093179	0.00191284	0.00582939	0.00582939	hypothetical protein	1080	1330	1367	820	955	1134
F816_RS0108680	0.0193095	0.627192	0.159349	0.0681124	7.91994	0.0108524	0.000364305	0.00367918	0.00659464	0.00659464	glutamate synthase large subunit	2716	3347	3434	2382	2246	2596
F816_RS0109555	0.019587	0.627192	-0.875586	0.375117	2.29742	0.238944	0.135989	-0.124804	0.075081	0.075081	IS110 family transposase	5	7	7	12	12.9996	18
F816_RS0109845	0.0236314	0.627192	0.168394	0.0744098	6.08622	0.0130514	0.00226118	0.00341931	0.00604404	0.00604404	ferredoxin	415	538	577	366	347	439
F816_RS0109925	0.0215229	0.627192	0.241415	0.105023	5.4467	0.0307202	0.00476405	0.0117808	0.00703068	0.0117808	16S rRNA (guanine(527)-N(7))-methyltransferase RsmG	238	268	330	159	181	254
F816_RS0103935	0.0218868	0.627192	-0.197263	0.0860536	7.2582	0.0205601	0.000721115	0.0103867	0.00597796	0.0103867	tRNA-Asp	1075	1628	1434	1240	1457	1802
F816_RS0104655	0.023656	0.627192	-0.203672	0.0900142	5.34561	0.020953	0.00494632	0.00568904	0.00720751	0.00720751	tRNA-Glu	158	248	203	200	232	227
F816_RS0103110	0.0252298	0.636635	-0.16391	0.0732438	6.11716	0.00998428	0.00202752	0.000377922	0.00601946	0.00601946	AcrB/AcrD/AcrF family protein	393	455	480	434	493	471
F816_RS0103905	0.0247255	0.636635	-0.159687	0.0711088	6.34435	0.00874582	0.00170071	-0.000330856	0.00588398	0.00588398	ABC transporter ATP-binding protein	471	589	616	497	617	646
F816_RS0104675	0.0248919	0.636635	0.150754	0.0672087	7.08398	0.0102823	0.000908463	0.00342189	0.00586705	0.00586705	DUF4399 domain-containing protein	1085	1419	1629	922	1134	1095
F816_RS0109800	0.0252985	0.636635	0.150863	0.0674455	6.9804	0.00819586	0.00100146	0.00070851	0.00582188	0.00582188	TIGR00153 family protein	998	1328	1387	835	938	1071
F816_RS0100800	0.02574	0.641137	-0.149506	0.0670397	7.65948	0.00676842	0.000409295	-0.000330798	0.00633219	0.00633219	3-phosphoglycerate dehydrogenase	1791	2169	2314	1964	2206	2332
F816_RS0113515	0.0265131	0.653721	-0.172269	0.077647	6.00599	0.0101383	0.00292875	-0.00138449	0.00611483	0.00611483	endonuclease	335	409	443	357	446	459
F816_RS0102105	0.0270919	0.661314	0.17635	0.0797893	5.7369	0.0134929	0.00309605	0.00210791	0.00645345	0.00645345	succinyldiaminopimelate transaminase	294	368	422	255	248	305
F816_RS0110045	0.0275226	0.665175	0.189116	0.0858046	5.53014	0.0121794	0.00417836	-0.00236585	0.00686529	0.00686529	diaminopimelate epimerase	250	304	329	191	212	251
F816_RS0103955	0.0300134	0.674175	0.157946	0.072789	8.89765	0.0117811	0.000132667	0.0052386	0.0078147	0.0078147	ATP-dependent Clp protease ATP-binding subunit ClpX	7697	8403	9051	6336	6354	6497
F816_RS0104285	0.0303155	0.674175	0.147686	0.0681855	6.72364	0.00927231	0.00118056	0.00223063	0.00579334	0.00579334	peptidase M48	855	1026	965	684	710	803
F816_RS0104535	0.0308137	0.674175	0.217789	0.100853	4.9359	0.0216947	0.00720632	0.00212493	0.00805073	0.00805073	BolA family transcriptional regulator	126	196	177	98	124	134
F816_RS0105085	0.0309331	0.674175	-0.177579	0.0822911	6.18929	0.0175864	0.00205104	0.00810669	0.00596795	0.00810669	lipid A export permease/ATP-binding protein MsbA	386	540	501	463	576	479
F816_RS0105510	0.0308556	0.674175	-0.216674	0.100362	4.93591	0.0205691	0.00705799	0.00104808	0.00805072	0.00805072	hypothetical protein	106	142	151	121	143	181
F816_RS0105785	0.0299346	0.674175	-0.232276	0.106993	7.33418	0.0299226	0.000691102	0.0164801	0.00603716	0.0164801	NADH-quinone oxidoreductase subunit L	1032	1715	1690	1620	1667	1596
F816_RS0107870	0.0298946	0.674175	0.297753	0.137119	4.1402	0.0318823	0.0161542	-0.00954755	0.0120484	0.0120484	nodulation protein NodJ	62	85	85	43	49	62
F816_RS0107985	0.0299827	0.674175	0.14417	0.066428	7.0707	0.00695529	0.00075872	0.000141033	0.00586029	0.00586029	TetR/AcrR family transcriptional regulator	1161	1386	1483	896	1083	1145
F816_RS0108880	0.0307199	0.674175	0.176199	0.0815477	6.637	0.0172938	0.0012625	0.00871255	0.00580229	0.00871255	HNH endonuclease	701	965	1007	567	778	653
F816_RS0110565	0.0302167	0.674175	0.212498	0.0980502	5.07649	0.0183531	0.00673323	-0.000725184	0.00768753	0.00768753	sel1 repeat family protein	146	218	208	116	146	148
F816_RS0111665	0.0295403	0.674175	-0.147987	0.0680026	7.87413	0.0116381	0.000389659	0.00594541	0.00654687	0.00654687	50S ribosomal protein L5	2128	2857	2822	2685	2735	2614
F816_RS0100690	0.0334031	0.698783	-0.143436	0.0674293	6.87782	0.00691888	0.0010242	-9.08034e-05	0.00579587	0.00579587	chemotaxis protein CheW	826	982	1071	919	1016	1027
F816_RS0104035	0.0337252	0.698783	0.177723	0.0836997	5.5762	0.0174103	0.00373854	0.0061798	0.00676992	0.00676992	50S ribosomal protein L3 N(5)-glutamine methyltransferase	238	336	353	214	204	272
F816_RS0104605	0.0328694	0.698783	0.144529	0.0677373	7.77322	0.0101215	0.0004384	0.00438014	0.00644412	0.00644412	inorganic diphosphatase	2268	3120	2778	1996	2018	2270
F816_RS0108280	0.0325079	0.698783	-0.143638	0.0671801	7.6024	0.00893716	0.000492239	0.00294221	0.00627751	0.00627751	aspartate kinase	1616	2095	2257	1821	2243	2066
F816_RS0110260	0.0336395	0.698783	0.151965	0.0715344	7.2194	0.0130687	0.000807866	0.0068679	0.00595	0.0068679	ribose-5-phosphate isomerase RpiA	1310	1739	1656	1172	1071	1367
F816_RS0110880	0.0337798	0.698783	0.175284	0.0825762	6.56125	0.0173999	0.00123249	0.00899576	0.00581539	0.00899576	monothiol glutaredoxin, Grx4 family	730	921	806	554	562	738
F816_RS0106010	0.0342296	0.702139	0.193437	0.0913578	5.31579	0.0205452	0.00526252	0.00638722	0.00725684	0.00725684	DsrE family protein	201	249	264	171	149	208
F816_RS0110570	0.0350356	0.712682	0.284451	0.134942	4.14546	0.0322826	0.0153097	-0.00529857	0.0120045	0.0120045	hypothetical protein	68	82	80	46	46	64
F816_RS0113215	0.0353622	0.713382	-0.201718	0.0958649	5.31726	0.0232351	0.00507334	0.00871178	0.00725442	0.00871178	deoxynucleoside kinase	160	211	217	160	245	246
F816_RS0106090	0.0369624	0.735212	0.239839	0.114966	6.8081	0.0331173	0.00100723	0.0188184	0.00579029	0.0188184	serine O-acetyltransferase	1090	1080	1064	790	764	725
F816_RS0109115	0.0370508	0.735212	0.180461	0.0865436	5.49174	0.017296	0.00429148	0.00511615	0.00694321	0.00694321	5-(carboxyamino)imidazole ribonucleotide mutase	252	303	288	174	202	261
F816_RS0109195	0.0373479	0.735212	-0.142315	0.0683568	6.64606	0.00944862	0.00120793	0.00300777	0.00580106	0.00580106	hypothetical protein	623	797	874	776	771	798
F816_RS0107375	0.0379362	0.740819	0.216847	0.104477	4.783	0.024437	0.00782626	0.00508638	0.00854705	0.00854705	DUF2237 domain-containing protein	141	132	148	97	105	101
F816_RS0108390	0.0383004	0.741995	0.228666	0.11038	4.73868	0.0303069	0.00924199	0.00903363	0.00870422	0.00903363	preprotein translocase subunit TatD	110	143	156	77	89	129
F816_RS0104645	0.0388986	0.747649	0.214143	0.103688	4.96751	0.0258599	0.00816967	0.00695881	0.00795717	0.00795717	symmetrical bis(5'-nucleosyl)-tetraphosphatase	168	153	186	121	121	123
F816_RS0101180	0.0402048	0.754922	0.141657	0.0690457	6.70195	0.0090496	0.00135594	0.00243107	0.00579501	0.00579501	transcriptional regulator	776	995	1018	641	800	719
F816_RS0110545	0.039887	0.754922	0.141086	0.0686577	6.61382	0.0116213	0.00126506	0.00579717	0.00580575	0.00580575	hypothetical protein	655	978	941	645	642	684
F816_RS0112590	0.040156	0.754922	0.630648	0.307312	2.64388	0.166177	0.0911498	-0.0325731	0.0505115	0.0505115	hypothetical protein	17	23	20	7	14	8
F816_RS0100860	0.0408366	0.760932	-0.169148	0.0827055	6.45115	0.0167916	0.00179799	0.00846232	0.00584408	0.00846232	UTP--glucose-1-phosphate uridylyltransferase	485	702.96	681	539	635	808.969
F816_RS0111625	0.0424208	0.784463	-0.140987	0.0694733	8.2615	0.00776848	0.000265183	0.00199141	0.00697463	0.00697463	preprotein translocase subunit SecY	3216	4197	4107	3782	3963	4052
F816_RS0111670	0.0431173	0.791349	-0.135868	0.0671759	7.35772	0.00851376	0.000712347	0.0030073	0.00605655	0.00605655	50S ribosomal protein L24	1252	1786	1659	1502	1574	1693
F816_RS0105040	0.0441612	0.791581	0.409303	0.203375	4.0241	0.0998922	0.0176289	0.0444129	0.0131034	0.0444129	HAD family hydrolase	72	64	81	38	60	34
F816_RS0105150	0.0448668	0.791581	0.379495	0.189189	3.45552	0.0678213	0.0322762	-0.00150566	0.0214126	0.0214126	RNA 2',3'-cyclic phosphodiesterase	37	42	41	27	19	28
F816_RS0105780	0.0449282	0.791581	-0.234236	0.116807	6.80212	0.0328327	0.00111957	0.0193463	0.0057903	0.0193463	NADH-quinone oxidoreductase subunit M	621	961	1012	1007	978	889
F816_RS0107535	0.0442403	0.791581	-0.459926	0.228613	3.04036	0.0704051	0.0457253	-0.0370433	0.0326709	0.0326709	hypothetical protein	13	19	20	20	27	27
F816_RS0112950	0.0450757	0.791581	0.138334	0.0690307	6.67932	0.00736569	0.0013507	0.000680316	0.00579715	0.00579715	histidine kinase	761	968	992	676	673	761
F816_RS14770	0.0444023	0.791581	-0.350864	0.174536	3.84948	0.0734869	0.0219321	0.0237619	0.0150362	0.0237619	elongation factor Tu	27.7795	58.0177	43.1108	52.3977	57.603	47.9082
F816_RS0100625	0.0470124	0.796373	-0.194076	0.0977127	5.05744	0.0128159	0.00659204	-0.00469674	0.00772961	0.00772961	flagellar biosynthesis protein FlhB	135	161	156	152	165	174
F816_RS14365	0.0466352	0.796373	0.323918	0.162806	3.8019	0.059171	0.0241137	0.010504	0.0156449	0.0156449	hypothetical protein	47	54	66	37	27	45
F816_RS0106095	0.0476084	0.796373	0.297145	0.150009	5.82557	0.053492	0.0028726	0.0308816	0.00631389	0.0308816	transcriptional regulator	412	424	409	321	237	276
F816_RS0107350	0.0479586	0.796373	0.227093	0.114825	5.4708	0.0312932	0.00381665	0.0159605	0.00698454	0.0159605	AmmeMemoRadiSam system protein B	272	249	327	203	179	221
F816_RS0109575	0.0458212	0.796373	0.13983	0.0700186	6.52526	0.00745266	0.00153044	0.000453253	0.00582346	0.00582346	gamma-glutamyltransferase	676	831	821	532	590	693
F816_RS0110890	0.0468679	0.796373	-0.179596	0.0903633	5.96514	0.0194751	0.00248508	0.00976321	0.00615485	0.00976321	aminoacyl-tRNA hydrolase	284	442	423	409	376	425
F816_RS0111655	0.0469806	0.796373	-0.133404	0.0671561	7.56684	0.010334	0.000520978	0.0057228	0.00624393	0.00624393	30S ribosomal protein S8	1507	2186	2117	1931	1933	2001
F816_RS0113710	0.0476334	0.796373	-0.205677	0.103844	8.89562	0.0256313	0.000144747	0.0160307	0.00781169	0.0160307	DNA-directed RNA polymerase subunit beta'	5176	7895	8252	7573	8305	7132
F816_RS0113650	0.0489405	0.807188	0.161858	0.0821984	5.63298	0.0099198	0.00348199	-0.000906449	0.00665288	0.00665288	sterol-binding protein	274	353	338	231	233	268
F816_RS0103465	0.0518759	0.838604	-0.189515	0.097479	5.05903	0.0151944	0.00652721	-0.00100272	0.00772603	0.00772603	kinase/pyrophosphorylase	134	160	160	147	184	161
F816_RS0109080	0.0517532	0.838604	-0.133315	0.0685362	6.69227	0.00936278	0.00124994	0.00378868	0.00579587	0.00579587	anthranilate synthase component I	658	932	824	700	843	917
F816_RS0110725	0.0513393	0.838604	0.149329	0.0766328	5.98366	0.0112151	0.0026725	0.00298414	0.00613637	0.00613637	anhydro-N-acetylmuramic acid kinase	435	450	470	308	351	390
F816_RS0104250	0.0522493	0.839083	0.150497	0.0775329	9.57297	0.00875863	6.61733e-05	0.0023886	0.00895085	0.00895085	hypothetical protein	13252	16948	19548	11258	12960	13749
F816_RS0112070	0.0537687	0.857839	-0.351804	0.182405	3.55098	0.0503957	0.0303485	-0.0137663	0.0195591	0.0195591	hypothetical protein	28	27	37	31	42	45
F816_RS0110340	0.0542504	0.859905	0.300767	0.156256	7.05819	0.0564373	0.000853987	0.03577	0.00585418	0.03577	ferredoxin--NADP reductase	1448	1427	1407	1109	861	886
F816_RS0109525	0.0546135	0.860074	0.230583	0.119974	4.95962	0.0332232	0.00718099	0.0144098	0.00797979	0.0144098	rhomboid family intramembrane serine protease	166	155	186	122	129	109
F816_RS0105460	0.0555606	0.869382	-0.21652	0.113097	5.55615	0.0294133	0.0038991	0.0152872	0.00681154	0.0152872	cation acetate symporter	214	232	296	279	297	244
F816_RS0100805	0.0585442	0.873142	-0.132439	0.0700143	6.51853	0.00741253	0.0015279	0.00116023	0.0058251	0.0058251	prephenate dehydratase	590	719	708	625	653	786
F816_RS0101210	0.0577558	0.873142	-0.134435	0.0708469	6.3522	0.00758142	0.00164832	0.00105114	0.00588061	0.00588061	GGDEF-domain containing protein	498	627	582	504	597	649
F816_RS0104525	0.0586625	0.873142	0.156438	0.0827402	5.64259	0.0120849	0.00363551	0.00229331	0.0066334	0.0066334	nucleoside triphosphate pyrophosphohydrolase	254	363	362	225	231	288
F816_RS0106110	0.0581306	0.873142	0.232125	0.122512	7.57148	0.0341757	0.000553389	0.0219604	0.00624829	0.0219604	iron-sulfur cluster assembly protein IscA	2395	2253	2268	1697	1483	1739
F816_RS0109185	0.058344	0.873142	-0.128433	0.0678425	7.89505	0.00703217	0.000335298	0.00226929	0.0065686	0.0065686	hybrid sensor histidine kinase/response regulator	2372	2732	2903	2283	2820	3083
F816_RS0112920	0.0582804	0.873142	0.140625	0.074264	6.37618	0.0125508	0.00162085	0.00665186	0.00587077	0.00665186	thiazole synthase	593	701	710	536	513	505
F816_RS0113230	0.0576625	0.873142	0.247549	0.130409	5.27753	0.0387919	0.00534127	0.0201684	0.00731973	0.0201684	aspartate 1-decarboxylase	185	283	244	141	141	219
F816_RS0113830	0.0565139	0.873142	-0.128877	0.067579	6.75327	0.00814998	0.00105873	0.0029003	0.00579165	0.00579165	ferritin	697	899	975	740	965	904
F816_RS0108375	0.0592505	0.876549	0.130895	0.0693915	6.53148	0.00724117	0.00140081	0.00122556	0.00582197	0.00582197	TolC family protein	679	757	902	543	611	677
F816_RS0111675	0.0596361	0.876938	-0.126531	0.0671797	7.54153	0.00770847	0.000549415	0.00308236	0.00622026	0.00622026	50S ribosomal protein L14	1657	2038	1934	1816	1807	2088
F816_RS0103590	0.0601567	0.878045	-0.163666	0.0870727	6.36377	0.0171339	0.00171135	0.00966114	0.00587578	0.00966114	hypothetical protein	480	612	613	639	569	581
F816_RS0104830	0.0609434	0.878045	-0.249577	0.133186	4.32659	0.0399727	0.014042	0.0125655	0.0106776	0.0125655	carbamate kinase	51	95	71	67	88	89
F816_RS0105400	0.0616524	0.878045	0.125463	0.0671358	7.29518	0.00918258	0.000754741	0.00482067	0.00600609	0.00600609	hypothetical protein	1500	1722	1762	1231	1427	1276
F816_RS0109730	0.0614678	0.878045	0.266843	0.142688	4.01198	0.0319759	0.0173163	-0.00404835	0.0132234	0.0132234	hydrogenase formation protein HypD	62	65	72	35	52	51
F816_RS0111080	0.0606268	0.878045	-0.25959	0.138359	4.26158	0.0431881	0.0140841	0.0146308	0.0111134	0.0146308	iron ABC transporter permease	58	80	60	57	80	96
F816_RS0113295	0.0618696	0.878045	0.203957	0.10923	5.5025	0.0267968	0.00410641	0.0137903	0.00692161	0.0137903	hypothetical protein	248	345	275	204	183	245
F816_RS0100410	0.0630331	0.879222	0.153458	0.0825504	5.55671	0.0136644	0.00341145	0.00483806	0.0068104	0.0068104	phospholipase D family protein	241	317	336	178	250	261
F816_RS0101085	0.0625688	0.879222	0.13128	0.0704956	6.44363	0.0100887	0.00160796	0.00454004	0.00584648	0.00584648	ABC transporter ATP-binding protein	614	778	746	563	520	589
F816_RS0112630	0.0628004	0.879222	-0.138539	0.0744592	6.09278	0.0068587	0.00227757	-0.000901599	0.0060387	0.0060387	hypothetical protein	385	457	471	417	468	462
F816_RS0108585	0.0635533	0.881441	0.204363	0.110151	4.6603	0.015288	0.00919824	-0.00574978	0.00900154	0.00900154	HPr family phosphocarrier protein	105	128	139	74	95	103
F816_RS0101615	0.0651674	0.882798	0.134831	0.0731142	6.16579	0.007155	0.00203469	9.18298e-05	0.00598385	0.00598385	YgiQ family radical SAM protein	456	552	618	371	413	486
F816_RS0102270	0.0652672	0.882798	-0.203927	0.110624	5.89559	0.027161	0.0026952	0.0156613	0.00622928	0.0156613	flagellar biosynthesis anti-sigma factor FlgM	346	349	344	390	394	358
F816_RS0106750	0.0648475	0.882798	-0.123526	0.0669042	7.43051	0.00636381	0.000595126	0.00163766	0.00611914	0.00611914	aspartate-semialdehyde dehydrogenase	1331	1866	1893	1549	1716	1839
F816_RS0107880	0.0654594	0.882798	-0.302949	0.164458	5.85926	0.0599892	0.00293405	0.0376356	0.00627137	0.0376356	hypothetical protein	218	340	433	282	452	449
F816_RS0108495	0.0649556	0.882798	-0.14659	0.0794285	5.77443	0.0110461	0.00307333	0.00267597	0.00638999	0.00638999	outer membrane lipid asymmetry maintenance protein MlaD	249	361	350	310	346	327
F816_RS0112870	0.06592	0.884125	0.146455	0.0796399	5.78176	0.0075808	0.00313545	-0.00170286	0.00637831	0.00637831	radical SAM protein	333	375	400	254	298	305
F816_RS0107235	0.0669518	0.888203	0.123351	0.0673316	6.83114	0.00809067	0.00100934	0.00339817	0.00579097	0.00579097	GGDEF domain-containing protein	964	1041	1123	715	902	866
F816_RS0107635	0.0668368	0.888203	-0.129134	0.0704585	6.39706	0.00913788	0.00158388	0.00358511	0.00586272	0.00586272	ketoacyl-ACP synthase III	478	696	630	563	634	621
F816_RS0102380	0.0704999	0.902081	-0.204511	0.113072	4.59847	0.017868	0.00992117	-0.00327043	0.00925659	0.00925659	succinate dehydrogenase assembly factor 2	80	96	109	84	106	125
F816_RS0103045	0.0695461	0.902081	0.12911	0.0711407	6.36803	0.0100101	0.00171746	0.00454414	0.00587404	0.00587404	MBL fold metallo-hydrolase	627	621	727	457	533	566
F816_RS0103150	0.0731717	0.902081	0.247131	0.137926	4.82241	0.0411505	0.00829982	0.0202357	0.00841294	0.0202357	hypothetical protein	139	135	173	95	128	91
F816_RS0103170	0.0704256	0.902081	-0.127601	0.0705304	6.34094	0.00685632	0.00157635	0.000888291	0.00588546	0.00588546	AcrB/AcrD/AcrF family protein	516	563	611	500	597	626
F816_RS0103445	0.0725185	0.902081	0.215085	0.119768	4.7015	0.0310918	0.00948588	0.0120307	0.00884192	0.0120307	hypothetical protein	107	124	162	99	97	84
F816_RS0103830	0.0724422	0.902081	0.173223	0.0964315	7.77685	0.0201607	0.000454133	0.0134944	0.00644776	0.0134944	metalloprotease TldD	2790	2715	2739	2035	2066	2106
F816_RS0105025	0.0724606	0.902081	-0.161946	0.0901594	5.5941	0.0176224	0.00354409	0.00864899	0.00673278	0.00864899	3-hydroxyacyl-acyl-carrier-protein] dehydratase Fab	200	298	300	274	245	311
F816_RS0106230	0.0687618	0.902081	0.200222	0.110013	6.44152	0.0265501	0.00148949	0.0166648	0.00584717	0.0166648	hypothetical protein	698	714	788	584	481	550
F816_RS0107500	0.0716674	0.902081	0.159978	0.0888162	5.41324	0.00825782	0.00474079	-0.00401587	0.00709168	0.00709168	molybdenum cofactor biosynthesis protein B	223	265	285	181	192	215
F816_RS0108075	0.0692528	0.902081	-0.122851	0.0676207	7.73746	0.0094	0.000450335	0.00564003	0.0064085	0.0064085	VWA domain-containing protein	1952	2509	2414	2041	2628	2287
F816_RS0111300	0.0722382	0.902081	-0.25564	0.142211	4.0236	0.0273344	0.0172276	-0.00756654	0.0131083	0.0131083	hypothetical protein	42	55	59	62	60	57
F816_RS0111705	0.0729687	0.902081	-0.122238	0.0681739	7.0547	0.0100598	0.000824505	0.00614702	0.00585252	0.00614702	30S ribosomal protein S19	883	1362	1268	1068	1135	1303
F816_RS0112585	0.068833	0.902081	0.197228	0.108396	4.7605	0.0168547	0.00899859	-0.00251731	0.00862594	0.00862594	polyisoprenoid-binding protein	116	133	162	85	112	104
F816_RS0113730	0.0713439	0.902081	-0.120773	0.0669739	7.11507	0.00969833	0.000844359	0.00580878	0.00588389	0.00588389	50S ribosomal protein L1	962	1419	1342	1210	1244	1255
F816_RS0113320	0.073646	0.903367	0.120064	0.0671197	7.56026	0.00822665	0.00051983	0.0043577	0.00623776	0.00623776	rhodanese-like domain-containing protein	1828	2296	2383	1669	1807	1660
F816_RS0102540	0.0743918	0.90395	0.155515	0.0871625	5.47292	0.0121636	0.00441557	0.00171958	0.00698039	0.00698039	glutaredoxin	217	277	333	177	226	225
F816_RS0106100	0.0744343	0.90395	0.249315	0.139756	8.12131	0.0420853	0.000309544	0.0289879	0.00681338	0.0289879	IscS subfamily cysteine desulfurase	3702	4282	4124	3298	2396	2810
F816_RS0100665	0.0754718	0.907521	-0.135231	0.0760754	6.02014	0.00802289	0.0025796	0.000591265	0.0061016	0.0061016	chemotaxis response regulator protein-glutamate methylesterase	358	427	438	410	412	427
F816_RS0111680	0.0753022	0.907521	-0.175556	0.0987037	7.10437	0.0209369	0.000830819	0.0137828	0.00587793	0.0137828	30S ribosomal protein S17	895	1494	1222	1218	1240	1315
F816_RS0113470	0.076408	0.914274	0.132714	0.0748985	6.39367	0.0120156	0.00160632	0.00680835	0.00586399	0.00680835	DNA polymerase I	538	770	742	471	489	643
F816_RS0105385	0.0781335	0.916941	-0.156666	0.0889328	6.46664	0.0168541	0.00139537	0.0104682	0.00583931	0.0104682	cytochrome c	564	612	718	590	772	625
F816_RS0107395	0.077895	0.916941	-0.340598	0.193189	3.37049	0.0734978	0.0327186	0.0156511	0.0232642	0.0232642	CPBP family intramembrane metalloprotease	18	26	35	35	25	38
F816_RS0109835	0.0776247	0.916941	0.137891	0.0781415	6.1883	0.0130315	0.0021587	0.00700045	0.0059686	0.00700045	hydroxymethylbilane synthase	504	580	572	440	391	461
F816_RS0112555	0.0771464	0.916941	0.13089	0.0740544	9.09069	0.00733766	0.000115642	0.00263183	0.00811043	0.00811043	NAD/FAD-binding protein	7960	10655	11827	7276	7833	8529
F816_RS0101230	0.079435	0.924962	-0.141504	0.0806763	6.05497	0.0138174	0.00224672	0.00751627	0.00607039	0.00751627	methyltransferase domain-containing protein	321	474	484	367	495	445
F816_RS0112205	0.0795747	0.924962	-0.217983	0.124337	4.5882	0.0328066	0.0106106	0.012579	0.00930091	0.012579	hypothetical protein	76	96	109	83	134	99
F816_RS0109440	0.0800948	0.926594	0.222945	0.127387	4.33369	0.0332932	0.0137086	0.00926871	0.0106327	0.0106327	hypothetical protein	91	83	95	67	56	70
F816_RS0110815	0.0810705	0.933458	0.181782	0.104202	5.79345	0.0229432	0.00352571	0.0127615	0.00636018	0.0127615	thioredoxin	322	453	374	270	247	340
F816_RS0100560	0.102197	0.937833	-0.125433	0.0767509	6.02008	0.00898639	0.00273439	0.00259852	0.00610165	0.00610165	flagellar M-ring protein FliF	372	439	416	401	426	416
F816_RS0100845	0.100652	0.937833	-0.152215	0.0927177	5.2539	0.0172667	0.00492591	0.00796894	0.00735877	0.00796894	hypothetical protein	148	226	195	197	178	211
F816_RS0101125	0.0850118	0.937833	-0.124818	0.0724707	6.26024	0.00532436	0.00195293	-0.00113977	0.00592507	0.00592507	LemA family protein	433	557	580	489	543	550
F816_RS14255	0.101987	0.937833	0.209025	0.127821	4.43305	0.0250886	0.0144543	0.000522114	0.0100529	0.0100529	hypothetical protein	85.286	93.5013	118.918	54.8877	76.1175	86.677
F816_RS0101245	0.0998543	0.937833	0.121667	0.0739363	6.18742	0.00530486	0.00223068	-0.00115065	0.00596918	0.00596918	bifunctional (p)ppGpp synthetase/guanosine-3',5'-bis(diphosphate) 3'-pyrophosphohydrolase relA	488	554	602	389	451	462
F816_RS0101770	0.0895927	0.937833	0.280871	0.165456	3.69892	0.0471504	0.0239641	0.0053908	0.0170996	0.0170996	heme-binding protein	45	44	58	26	30	45
F816_RS0102280	0.102106	0.937833	-0.148154	0.090629	5.23384	0.0159018	0.0049281	0.00671805	0.00739231	0.00739231	flagellar brake protein	146	217	195	181	170	225
F816_RS0102290	0.0998309	0.937833	0.146768	0.089184	6.11971	0.0160068	0.00229126	0.00963942	0.0060175	0.00963942	MerR family transcriptional regulator	451	548	558	303	437	481
F816_RS0102515	0.0862912	0.937833	0.847895	0.494314	1.69711	0.283941	0.215104	-0.129775	0.151416	0.151416	phosphate ABC transporter, permease protein PstA	9	7	9	4	2	3
F816_RS0102605	0.095111	0.937833	-0.271557	0.162703	3.81305	0.0475792	0.0242096	0.0076106	0.015499	0.015499	ABC transporter ATP-binding protein	38	42	44	56	50	41
F816_RS0102695	0.0924516	0.937833	0.165318	0.0982512	5.81598	0.019783	0.00268898	0.011791	0.00632715	0.011791	thioredoxin family protein	304	466	402	280	323	275
F816_RS0102715	0.0962881	0.937833	-0.145105	0.0872486	5.61087	0.0154514	0.00363785	0.00778063	0.00669814	0.00778063	DUF86 domain-containing protein	237	274	297	271	311	254
F816_RS0104520	0.092442	0.937833	0.134628	0.0800092	5.80088	0.0126057	0.0032532	0.00570713	0.00634901	0.00634901	oxidoreductase	302	439	392	252	279	354
F816_RS0104570	0.100815	0.937833	-0.164633	0.10033	5.81448	0.0202106	0.00299871	0.0121005	0.00632927	0.0121005	DUF493 domain-containing protein	246	328	428	293	340	408
F816_RS0104640	0.0956776	0.937833	0.138715	0.0832536	6.02756	0.01409	0.00270639	0.00769035	0.00609478	0.00769035	Co2+/Mg2+ efflux protein ApaG	366	476	593	362	348	388
F816_RS0105000	0.101621	0.937833	0.172014	0.105076	5.03014	0.0221258	0.00700425	0.00955714	0.00779332	0.00955714	Na(+)/H(+) antiporter subunit B	157	203	170	103	138	163
F816_RS0105130	0.096398	0.937833	0.294594	0.177192	3.63608	0.0467288	0.0290081	-0.00314181	0.0180874	0.0180874	tRNA glutamyl-Q(34) synthetase GluQRS	34	57	50	28	26	39
F816_RS0105290	0.089349	0.937833	0.153625	0.0904291	5.31415	0.0131511	0.0050066	0.00258208	0.00725954	0.00725954	thioredoxin domain-containing protein	203	249	245	184	170	179
F816_RS0105605	0.100636	0.937833	-0.151794	0.0924574	5.18513	0.0161637	0.00534628	0.0062178	0.00747626	0.00747626	hypothetical protein	133	190	210	174	163	212
F816_RS0105775	0.0909026	0.937833	-0.201553	0.119216	6.56901	0.0292421	0.00147318	0.0198456	0.00581381	0.0198456	NADH-quinone oxidoreductase subunit NuoN	488	833	775	753	780	705
F816_RS0106650	0.0956696	0.937833	-0.114973	0.0690022	6.67916	0.00820379	0.00134478	0.00395293	0.00579717	0.00579717	4-alpha-glucanotransferase	738	776	872	688	791	930
F816_RS0106730	0.0892945	0.937833	-0.399851	0.235327	3.07575	0.0819706	0.051602	-0.0090941	0.031466	0.031466	LysR family transcriptional regulator	16	18	21	20	20	37
F816_RS0107250	0.0835279	0.937833	0.155069	0.0896054	5.29893	0.0123843	0.00475913	0.00170387	0.00728455	0.00728455	hypothetical protein	213	230	242	152	168	209
F816_RS0107405	0.0971092	0.937833	-0.162505	0.0979515	5.01289	0.00965275	0.0065559	-0.00439288	0.00783584	0.00783584	hypothetical protein	132	151	156	137	165	161
F816_RS0107545	0.095364	0.937833	-0.189583	0.113675	4.57234	0.0251033	0.0100125	0.00788849	0.00937061	0.00937061	thioredoxin	92	86	100	100	107	94
F816_RS0107615	0.0996502	0.937833	0.119237	0.0724165	6.21623	0.00700747	0.00191545	0.00151229	0.00595077	0.00595077	acetyl-CoA carboxylase biotin carboxylase subunit	523	573	590	399	474	469
F816_RS0108215	0.0964237	0.937833	-0.165601	0.0996132	4.97044	0.0138718	0.00693528	0.000120479	0.00794889	0.00794889	decaprenyl-phosphate phosphoribosyltransferase	131	135	154	146	145	152
F816_RS0108245	0.0846274	0.937833	-0.174665	0.101287	5.02121	0.0167366	0.00757362	0.00190674	0.0078151	0.0078151	DNA mismatch repair protein MutS	113	171	162	127	171	175
F816_RS0108400	0.095887	0.937833	-0.178433	0.107159	8.28845	0.0233312	0.000239174	0.0169854	0.00700653	0.0169854	hypothetical protein	3264	3979	4375	4266	4509	3621
F816_RS0109005	0.083753	0.937833	0.222747	0.128807	4.86911	0.0347943	0.00802231	0.0168645	0.00826001	0.0168645	hypothetical protein	127	163	174	77	131	131
F816_RS0109105	0.0820401	0.937833	-0.13311	0.0765456	6.02821	0.0113283	0.00269465	0.00482136	0.00609419	0.00609419	class I SAM-dependent methyltransferase	331	461	451	361	397	514
F816_RS0109200	0.0986301	0.937833	-0.250833	0.151879	6.53979	0.0465557	0.00139951	0.0332013	0.00582005	0.0332013	response regulator	495	705	768	591	1003	689
F816_RS0109270	0.0859084	0.937833	-0.123262	0.071773	7.89506	0.0107397	0.000401858	0.00732519	0.00656861	0.00732519	twitching motility protein PilT	2077	2988	3055	2718	2637	2748
F816_RS0109615	0.0996261	0.937833	0.22007	0.133645	4.15454	0.0209608	0.0148622	-0.0068226	0.0119295	0.0119295	hypothetical protein	74	73	77	49	54	58
F816_RS0110075	0.0976992	0.937833	-0.383682	0.231677	3.04365	0.0867311	0.0479542	0.00525508	0.0325568	0.0325568	hypothetical protein	20	20	14	24	21	26
F816_RS0110115	0.0842959	0.937833	-0.122395	0.0709006	6.3861	0.00680301	0.00167346	0.00121263	0.00586688	0.00586688	twin-arginine translocase subunit TatC	498	630	653	542	654	599
F816_RS14620	0.0966926	0.937833	-0.410817	0.247316	3.55251	0.0904393	0.0722164	-0.0224563	0.0195313	0.0195313	glyoxalase/bleomycin resistance/dioxygenase family protein	20.8801	26.6202	46.1514	38.0758	44.0427	38.3896
F816_RS0110355	0.0923748	0.937833	-0.185633	0.110299	4.62781	0.0249369	0.00894796	0.00930077	0.00913308	0.00930077	NAD(P)-dependent oxidoreductase	75	102	123	83	126	113
F816_RS0110550	0.0876472	0.937833	0.195007	0.114176	4.64068	0.0170001	0.010474	-0.00348424	0.00908034	0.00908034	hypothetical protein	106	126	130	70	96	103
F816_RS0111275	0.09383	0.937833	0.231329	0.138063	4.2048	0.0378954	0.0170612	0.0102408	0.0115308	0.0115308	hypothetical protein	72	76	90	62	59	48
F816_RS0111700	0.0855373	0.937833	-0.144415	0.0839902	7.44269	0.0147219	0.000574867	0.0100067	0.00612995	0.0100067	50S ribosomal protein L22	1350	2033	1722	1700	1618	1902
F816_RS0111750	0.0990277	0.937833	-0.214721	0.130166	4.23073	0.0220333	0.014079	-0.00382665	0.011336	0.011336	catalase HPII	58	60	78	59	78	81
F816_RS0111870	0.0826356	0.937833	0.23772	0.136968	4.36266	0.0394654	0.0145353	0.0136049	0.0104544	0.0136049	exodeoxyribonuclease VII large subunit	79	93	109	77	56	65
F816_RS0111935	0.0919538	0.937833	0.222443	0.131999	4.7813	0.0357529	0.00812266	0.0180131	0.00855292	0.0180131	hypothetical protein	131	154	137	107	109	87
F816_RS0111945	0.100378	0.937833	-0.142654	0.0868242	6.18663	0.0151512	0.00210545	0.0092022	0.0059697	0.0092022	GGDEF domain-containing protein	432	457	553	389	555	557
F816_RS0111975	0.100514	0.937833	0.256173	0.155978	4.55259	0.0488822	0.0105232	0.0259703	0.00945944	0.0259703	TetR/AcrR family transcriptional regulator	124	109	108	83	67	87
F816_RS0112260	0.0901334	0.937833	0.271887	0.160434	3.82766	0.0444169	0.023298	0.00450227	0.0153107	0.0153107	polysaccharide deacetylase	49	56	61	26	46	44
F816_RS0112355	0.0833977	0.937833	-0.186978	0.107998	4.78771	0.0196956	0.00896464	0.00254459	0.00853075	0.00853075	hypothetical protein	92	114	145	108	142	125
F816_RS0112635	0.0859663	0.937833	-0.153474	0.0893813	7.43153	0.0166531	0.000618609	0.0113649	0.00612004	0.0113649	hypothetical protein	1471	1531	2002	1435	1968	1816
F816_RS0112675	0.0968358	0.937833	0.128289	0.0772641	5.86158	0.00824121	0.00268598	0.00144379	0.00626862	0.00626862	long-chain fatty acid--CoA ligase	331	412	453	261	348	332
F816_RS0113075	0.102034	0.937833	-0.1466	0.0896598	5.95049	0.0160942	0.0027963	0.00926203	0.00616986	0.00926203	UDP-N-acetylmuramate--L-alanine ligase	341	365	429	304	446	439
F816_RS0113345	0.0935821	0.937833	0.121537	0.0724816	6.20563	0.00913349	0.00192298	0.00395466	0.00595739	0.00595739	heme ABC transporter ATPase	479	575	624	432	398	498
F816_RS0113560	0.10184	0.937833	-0.159618	0.0975661	5.4628	0.0190663	0.00449002	0.00978869	0.00700004	0.00978869	RNA ligase	237	218	234	230	240	254
F816_RS0113740	0.0964547	0.937833	-0.13385	0.0805217	7.11082	0.0131553	0.000836392	0.00888924	0.0058815	0.00888924	transcription termination/antitermination protein NusG	955	1452	1279	1147	1150	1442
F816_RS0105250	0.10507	0.940176	0.168552	0.103996	4.81377	0.0157545	0.00778084	0.0012586	0.00844189	0.00844189	glycolate oxidase iron-sulfur subunit	119	144	164	102	119	100
F816_RS0106220	0.104551	0.940176	-0.18169	0.111935	4.64456	0.0249386	0.00952524	0.0092688	0.0090646	0.0092688	YaiI/YqxD family protein	93	101	106	90	96	143
F816_RS0106600	0.105529	0.940176	-0.1345	0.0830956	6.51177	0.0137129	0.00162478	0.00873254	0.0058268	0.00873254	lysine--tRNA ligase	503	809	721	655	664	725
F816_RS0106765	0.105435	0.940176	0.843558	0.521018	1.68549	0.495831	0.253698	0.0992444	0.153491	0.153491	tRNA pseudouridine(38-40) synthase TruA	10	6	9	1	7	3
F816_RS0108035	0.105343	0.940176	-0.109156	0.0674017	7.36885	0.00475997	0.000748603	0.000733214	0.00606588	0.00606588	BMC domain-containing protein	1316.21	1745.75	1737.56	1369.2	1637.56	1773.22
F816_RS0109580	0.104391	0.940176	0.13565	0.083532	5.62524	0.00605548	0.00379775	-0.00312875	0.00666865	0.00666865	ferredoxin	264	324	359	219	247	271
F816_RS0109870	0.105958	0.940176	0.108136	0.0668895	7.39624	0.00860672	0.000622094	0.0057513	0.00608922	0.00608922	M3 family peptidase	1425	1973	2136	1283	1398	1737
F816_RS0110310	0.105776	0.940176	0.11929	0.0737505	6.12117	0.00988599	0.00214232	0.00487891	0.00601638	0.00601638	DNA mismatch repair endonuclease MutL	448	502	591	400	423	394
F816_RS0111450	0.103513	0.940176	-0.109021	0.0669638	7.45983	0.00478548	0.000580935	0.000943833	0.0061453	0.0061453	membrane protein	1495	1811	1938	1633	1807	1770
F816_RS0113465	0.106304	0.940176	0.110205	0.0682369	6.75646	0.00609238	0.0011929	0.00186819	0.00579151	0.00579151	TIGR00730 family Rossman fold protein	870	963	1054	696	829	789
F816_RS0111035	0.106927	0.942274	-0.147659	0.0915911	5.26276	0.0080902	0.0052393	-0.00330278	0.00734408	0.00734408	FkbM family methyltransferase	153	206	214	185	199	205
F816_RS0108715	0.108834	0.95006	0.107377	0.0669657	6.93824	0.00814249	0.000917844	0.00493662	0.00580877	0.00580877	type II secretion system protein GspD	1061	1181	1211	829	1030	924
F816_RS0109335	0.108979	0.95006	0.124447	0.0776436	5.91845	0.00988242	0.00283885	0.00370651	0.00620393	0.00620393	hypothetical protein	346	436	483	327	299	368
F816_RS0110885	0.108573	0.95006	-0.116324	0.0724925	6.24484	0.00540451	0.00194901	-0.000267627	0.00593373	0.00593373	redox-regulated ATPase YchF	427	550	576	496	514	540
F816_RS0100605	0.10938	0.950167	-0.270853	0.169179	3.70368	0.0321892	0.0259044	-0.0131784	0.0170279	0.0170279	flagellar biosynthetic protein FliO	36	40	35	39	48	44
F816_RS0104970	0.110386	0.955506	0.207533	0.129996	7.33098	0.0331997	0.000622171	0.0247262	0.00603456	0.0247262	hypothetical protein	1745	1763	1863	1473	1163	1288
F816_RS0108500	0.111381	0.956206	-0.152318	0.0956759	5.13493	0.0123512	0.00616213	0.000576657	0.00756868	0.00756868	ABC transporter permease	156	167	175	149	194	179
F816_RS0110845	0.111642	0.956206	-0.118448	0.0744555	6.12833	0.0066006	0.00230448	0.000685066	0.00601095	0.00601095	PAS domain S-box protein	410	489	474	436	474	471
F816_RS0113460	0.11161	0.956206	0.152792	0.096035	5.26574	0.0180708	0.00477883	0.00905525	0.00733915	0.00905525	DUF2782 domain-containing protein	219	217	225	159	187	163
F816_RS0104870	0.112226	0.957844	0.115819	0.0729214	6.12572	0.0101008	0.00196338	0.00563237	0.00601292	0.00601292	electron transport complex subunit RsxC	494	531	511	378	431	417
F816_RS0105190	0.113685	0.963559	0.139451	0.0881571	5.37929	0.0125218	0.00450676	0.00385304	0.00715075	0.00715075	transcription antitermination factor NusB	214	262	263	179	169	230
F816_RS0108085	0.113573	0.963559	0.113298	0.0716018	6.36307	0.00475696	0.00181416	-0.000681631	0.00587607	0.00587607	DUF4440 domain-containing protein	548	660	753	471	519	569
F816_RS0101165	0.116816	0.97632	-0.132546	0.0845166	5.5311	0.00739788	0.00385128	-0.00119208	0.00686331	0.00686331	ABC transporter permease	206	271	277	227	279	261
F816_RS0104515	0.116015	0.97632	0.167366	0.106486	6.55051	0.0220104	0.00168931	0.0153194	0.00581766	0.0153194	L-aspartate oxidase	705	884	832	617	677	539
F816_RS14400	0.116178	0.97632	-0.38883	0.247501	3.00197	0.0674588	0.0578453	-0.0302174	0.03404	0.03404	hypothetical protein	18.3769	14.1806	18.7645	20.8185	24.2551	23.0285
F816_RS0108600	0.11719	0.97632	0.143367	0.0915102	5.261	0.0160233	0.00521417	0.00710723	0.007347	0.007347	hypothetical protein	210	202	245	165	178	165
F816_RS0105765	0.116865	0.97632	-0.394663	0.251687	2.90258	0.111323	0.0571152	0.0236288	0.0379041	0.0379041	tRNA-Met	17	11	19	20	16	27
F816_RS0102725	0.118447	0.976791	0.147034	0.0941729	7.43487	0.017128	0.000565136	0.0127377	0.006123	0.0127377	quinolinate synthase NadA	1946	1881	1953	1444	1539	1485
F816_RS0111815	0.117865	0.976791	-0.292918	0.187312	4.12603	0.0678434	0.017342	0.0352868	0.0121683	0.0352868	AI-2E family transporter	48	60	61	45	97	70
F816_RS0112105	0.118319	0.976791	0.156947	0.100487	4.9934	0.0165215	0.00726022	0.00415444	0.00788618	0.00788618	type II toxin-antitoxin system mRNA interferase toxin, RelE/StbE family	152	160	195	101	141	149
F816_RS0102560	0.118882	0.97707	0.109021	0.0699086	8.37507	0.00899723	0.00021973	0.00656969	0.00711108	0.00711108	superoxide dismutase	3803	5492	5430	3768	3601	4325
F816_RS0111255	0.119688	0.980401	0.217236	0.139604	4.09126	0.0196135	0.0167614	-0.00994124	0.0124727	0.0124727	DUF3634 domain-containing protein	67	69	74	49	49	53
F816_RS0100680	0.126103	0.981447	-0.118232	0.0772934	5.90274	0.00607261	0.00274015	-0.000391441	0.00622126	0.00622126	ParA family protein	329	357	411	327	375	403
F816_RS0100850	0.128507	0.981447	-0.15034	0.0989067	4.96447	0.0147072	0.00670796	0.00320035	0.00796583	0.00796583	orotidine-5'-phosphate decarboxylase	110	167	149	129	164	146
F816_RS0101095	0.127478	0.981447	0.102646	0.0673474	7.7131	0.00822777	0.000419052	0.0059146	0.00638445	0.00638445	peptidase M23	1901	2904	2792	1839	2107	2098
F816_RS0101380	0.127263	0.981447	-0.151817	0.0995531	5.02091	0.0148466	0.0070504	0.00286466	0.00781584	0.00781584	2-C-methyl-D-erythritol 4-phosphate cytidylyltransferase	122	169	157	141	177	147
F816_RS13965	0.122389	0.981447	-0.251552	0.162836	3.69259	0.0294943	0.0225778	-0.00943937	0.0171954	0.0171954	hypothetical protein	33	39	39	37	38	55
F816_RS0103485	0.125684	0.981447	-0.115422	0.0753728	6.19865	0.0108139	0.00194663	0.00657496	0.00596185	0.00657496	alpha-L-glutamate ligase-like protein	417	548	516	390	521	589
F816_RS0104220	0.12574	0.981447	0.124949	0.0816059	7.76032	0.0126751	0.000458178	0.00953111	0.00643122	0.00953111	radical SAM protein	2114	3031	2866	2141	1905	2221
F816_RS0106495	0.128326	0.981447	0.16772	0.110289	5.78069	0.0230354	0.00347532	0.0147701	0.00638001	0.0147701	hypothetical protein	387	345	385	262	306	278
F816_RS0106690	0.124959	0.981447	-0.141322	0.0921091	5.2316	0.00993438	0.00533004	-0.000401502	0.00739609	0.00739609	DUF393 domain-containing protein	158	180	218	162	208	202
F816_RS0106810	0.121546	0.981447	-0.162624	0.105033	4.87939	0.0127357	0.00832064	-0.00231851	0.00822712	0.00822712	L,D-transpeptidase	110	138	137	109	152	147
F816_RS0107065	0.128654	0.981447	-0.156513	0.103008	5.22292	0.0200816	0.0052955	0.0106204	0.00741078	0.0106204	hypothetical protein	178	165	201	191	192	185
F816_RS0108150	0.122542	0.981447	0.387431	0.250895	2.95015	0.120569	0.0551142	0.0393086	0.0359949	0.0393086	cation:proton antiporter	15	27	34	10	13	23
F816_RS0108360	0.124022	0.981447	0.11726	0.0762365	6.00681	0.00806381	0.00260396	0.00231957	0.00611405	0.00611405	copper resistance protein CopD	430	447	489	320	388	382
F816_RS0109545	0.123032	0.981447	0.314444	0.203897	3.29575	0.0675445	0.0372962	0.0100562	0.025065	0.025065	tRNA (cytidine(34)-2'-O)-methyltransferase	25	33	43	26	17	22
F816_RS0109660	0.125604	0.981447	0.136905	0.0893832	5.92835	0.0152101	0.00259282	0.00939121	0.00619323	0.00939121	Ni/Fe hydrogenase subunit alpha	366	439	476	251	366	396
F816_RS0109935	0.124983	0.981447	0.104318	0.0679951	6.73375	0.00330576	0.00114232	-0.00109092	0.00579269	0.00579269	chromosome partitioning protein ParB	806	982	1033	688	767	813
F816_RS0110120	0.128662	0.981447	0.169079	0.11128	8.33636	0.0234361	0.000262128	0.0183127	0.00706397	0.0183127	2,3-bisphosphoglycerate-independent phosphoglycerate mutase	4204	5041	5214	3909	3810	3206
F816_RS0110245	0.120674	0.981447	0.112277	0.0723455	8.81871	0.00472106	0.000151091	0.00102297	0.00769971	0.00769971	FAD-linked oxidase	6426	7998	8393	5781	6009	6363
F816_RS0110250	0.127202	0.981447	-0.134255	0.0880227	8.06174	0.0147049	0.000368979	0.011253	0.00674714	0.011253	rhodanese-like domain-containing protein	2553	3190	3776	3244	3387	3005
F816_RS0111040	0.124424	0.981447	-0.115842	0.075395	6.00419	0.00906952	0.00241007	0.00389457	0.00611654	0.00611654	hypothetical protein	372	407	434	332	448	449
F816_RS0112655	0.12123	0.981447	-0.138841	0.0895963	5.36462	0.0083418	0.00486559	-0.00166715	0.00717566	0.00717566	hypothetical protein	181	228	225	210	222	217
F816_RS0113735	0.120495	0.981447	-0.168264	0.108369	6.4349	0.0225865	0.00176615	0.0158496	0.00584935	0.0158496	50S ribosomal protein L11	434	733	696	631	587	711
F816_RS0109990	0.129166	0.982223	0.104168	0.0686487	6.62516	0.00732008	0.00126496	0.00381606	0.005804	0.005804	glutamine--fructose-6-phosphate transaminase (isomerizing)	741	859	927	605	763	671
F816_RS0100715	0.13049	0.986124	0.118499	0.0783633	5.83541	0.00745189	0.00291038	0.00113873	0.00630083	0.00630083	low molecular weight phosphotyrosine protein phosphatase	357	378	417	267	327	324
F816_RS0101465	0.130232	0.986124	-0.107683	0.0711632	6.38623	0.00515231	0.00172947	0.000362545	0.00586683	0.00586683	acyl-ACP--UDP-N-acetylglucosamine O-acyltransferase	515	652	624	529	581	676
F816_RS14730	0.130891	0.986124	-0.108752	0.0719923	6.27123	0.00710989	0.00185523	0.00259705	0.00591912	0.00591912	hypothetical protein	470	520	606	518	520	547
F816_RS0100130	0.193815	0.989904	-0.163138	0.125551	4.51007	0.0268998	0.00917216	0.0144724	0.00965907	0.0144724	tRNA preQ1(34) S-adenosylmethionine ribosyltransferase-isomerase QueA	67	97	105	72	89	125
F816_RS0100135	0.410177	0.989904	-0.0697173	0.0846514	5.53522	0.00457883	0.00389396	6.89218e-06	0.00685483	0.00685483	tRNA guanosine(34) transglycosylase Tgt	213	297	272	235	240	270
F816_RS0100140	0.777978	0.989904	0.0574587	0.203787	6.34495	0.0508252	0.00195613	0.0603373	0.00588372	0.0603373	preprotein translocase subunit YajC	403	868	678	467	432	710
F816_RS0100145	0.809389	0.989904	-0.0337302	0.139835	7.55941	0.023806	0.000452092	0.0288788	0.00623697	0.0288788	protein translocase subunit SecD	1358	2583	2258	1663	1693	2234
F816_RS0100150	0.898867	0.989904	-0.0110791	0.0871736	6.80562	0.0091559	0.00115582	0.010243	0.00579028	0.010243	protein translocase subunit SecF	797	1156	926	816	902	860
F816_RS0100155	0.184089	0.989904	-0.134601	0.101335	6.80733	0.0177578	0.00111602	0.0142873	0.00579028	0.0142873	DUF302 domain-containing protein	696	1103	928	768	884	1128
F816_RS0100160	0.45556	0.989904	-0.0803909	0.107737	4.77844	0.00786536	0.00884798	-0.00143979	0.00856289	0.00856289	NlpC/P60 family protein	104	121	138	94	133	127
F816_RS0100165	0.780038	0.989904	0.0304053	0.108875	5.74002	0.0145018	0.0031568	0.0146238	0.00644797	0.0146238	hypothetical protein	291	341	373	315	296	260
F816_RS0100170	0.624725	0.989904	0.0345682	0.0706679	6.38918	0.00305275	0.00162523	0.0017426	0.0058657	0.0058657	hypothetical protein	571	652	703	505	603	556
F816_RS0100175	0.790369	0.989904	0.0225896	0.0849771	5.55791	0.00251539	0.00402376	-0.00107087	0.0068079	0.0068079	penicillin-binding protein 1B	229	287	322	210	265	255
F816_RS0100180	0.737001	0.989904	0.0581577	0.173177	3.67019	0.0132557	0.0274444	-0.0121431	0.0175412	0.0175412	hypothetical protein	32	46	51	36	38	33
F816_RS0100185	0.693525	0.989904	-0.0370449	0.0940047	5.19231	0.00390049	0.00579172	-0.00143072	0.0074636	0.0074636	ATP-dependent DNA helicase	158	206	198	144	176	204
F816_RS0100190	0.885802	0.989904	0.0208118	0.14491	3.97301	0.0140315	0.0178752	-0.000498314	0.0136231	0.0136231	tRNA (adenosine(37)-N6)-threonylcarbamoyltransferase complex dimerization subunit type 1 TsaB	52	67	51	47	52	49
F816_RS0100195	0.888178	0.989904	-0.0241819	0.171978	4.98592	0.0356671	0.00787621	0.0364884	0.00790619	0.0364884	tRNA pseudouridine(13) synthase TruD	152	147	158	139	175	112
F816_RS0100200	0.735836	0.989904	-0.0353636	0.10482	7.02555	0.01356	0.00109067	0.0153903	0.0058394	0.0153903	PAS sensor domain-containing protein	1084	1171	1254	1150	1118	988
F816_RS0100205	0.319701	0.989904	0.0776398	0.0780243	9.62643	0.00594281	7.77104e-05	0.00509033	0.00905399	0.00905399	DUF3365 domain-containing protein	14450	17636	18131	12792	12591	16310
F816_RS0100210	0.336599	0.989904	-0.0807249	0.0840091	5.57994	0.00916023	0.00382414	0.00518246	0.00676216	0.00676216	DNA mismatch repair protein MutS	259	281	266	254	249	280
F816_RS0100215	0.514001	0.989904	-0.0443545	0.0679636	6.78333	0.00420553	0.00113797	0.0033812	0.00579061	0.00579061	5'/3'-nucleotidase SurE	707	1010	1063	795	831	942
F816_RS0100220	0.771752	0.989904	-0.0238009	0.0820482	5.60646	0.00577703	0.00339065	0.00361821	0.00670722	0.00670722	protein-L-isoaspartate(D-aspartate) O-methyltransferase	223	296	346	256	251	274
F816_RS0100225	0.355868	0.989904	-0.083734	0.0906933	5.32527	0.00754319	0.00509668	0.00170303	0.00724122	0.00724122	DedA family protein	165	248	219	185	215	208
F816_RS0100230	0.880206	0.989904	-0.0177557	0.117815	5.49753	0.0167511	0.00406943	0.0167512	0.00693161	0.0167512	LysM peptidoglycan-binding domain-containing protein	260	264	242	198	219	290
F816_RS0100235	0.917454	0.989904	-0.00695847	0.0671395	7.617	0.00170784	0.000470161	0.00164648	0.00629141	0.00629141	RNA polymerase sigma factor RpoS	1825	2191	2451	1827	1849	2126
F816_RS0100240	0.409158	0.989904	-0.072691	0.08807	6.2909	0.0108928	0.00168109	0.00995341	0.00590891	0.00995341	hypothetical protein	527	561	561	478	605	512
F816_RS14225	0.645265	0.989904	0.146552	0.318348	2.82857	0.128058	0.0802335	0.0717849	0.0411083	0.0717849	glyoxalase/bleomycin resistance/dioxygenase family protein	20.1314	19.9264	16.3145	8.15917	25.6223	14.1838
F816_RS0100245	0.516374	0.989904	0.057612	0.0887779	6.58497	0.0104536	0.00155048	0.0102718	0.00581073	0.0102718	alanine transaminase	632	889	868	634	579	802
[truncated: 2,484 more rows]

## Sheet: ALM2(T) (5mM vs. 0mM As(III)) 
Locus tag	P-value	q-value	b-value	Ste of b-value	Mean of obs	Var of obs	Tech var	Sigma sq	Smooth sigma sq	Final sigma sq	Protein product	Raw read counts
[truncated: 2,834 more rows]
