# Supplementary material for: Transcriptomic Analysis of Two Thioalkalivibrio Species Under Arsenite Stress Revealed a Potential Candidate Gene for an Alternative Arsenite Oxidation Pathway
Source: Front Microbiol. 2019 Jul 4;10:1514. doi: 10.3389/fmicb.2019.01514 (PMC6620896; doi:10.3389/fmicb.2019.01514)
Supplement: Supplementary file 9 [file Table_8.xlsx]

## Sheet: Upregulated genes
	Locus tag	b-value	P-value	q-value	Protein product
		(0.1mM/0mM As(III))
	F816_RS0102065	2.36927	0.000319805	0.00305633	universal stress protein UspA
	F816_RS0102010	1.94555	1.53586e-106	3.74288e-103	glycosyl transferase family 2
	F816_RS0102075	1.57993	1.26869e-14	1.62726e-12	arsenical-resistance protein ACR3
	F816_RS0102515	1.46581	0.00125938	0.00932857	phosphate ABC transporter, permease protein PstA
	F816_RS0109510	1.4357	1.40516e-24	6.84877e-22	GTP 3',8-cyclase MoaA
	F816_RS0109500	1.29776	3.17312e-41	1.93323e-38	4Fe-4S dicluster domain-containing protein SoeB
	F816_RS0102510	1.26365	1.5206e-05	0.000234538	phosphate ABC transporter permease PstC
	F816_RS0104780	1.16314	3.60611e-15	5.49255e-13	cobalamin biosynthesis protein CobN
	F816_RS0102505	1.12647	0.00121864	0.00913794	phosphate-binding protein PstS
	F816_RS0106175	1.10202	0.0110852	0.0524675	aminotransferase
	F816_RS0104760	1.09271	2.55025e-15	4.78074e-13	cob(I)yrinic acid a,c-diamide adenosyltransferase cobA/cobO
	F816_RS0109505	1.05661	1.34838e-51	1.64301e-48	formate dehydrogenase SoeA
	F816_RS0102525	1.04417	8.08459e-07	1.7911e-05	phosphate transport system regulatory protein PhoU
	F816_RS0103505	1.00283	0.0167503	0.0718596	ABC transporter substrate-binding protein ZnuA
	F816_RS0102520	0.904289	0.000186253	0.00197347	phosphate ABC transporter ATP-binding protein PstB
	F816_RS0105490	0.901743	0.00117477	0.0089466	molybdate ABC transporter permease subunit
	F816_RS0105495	0.894718	0.00028386	0.00276581	molybdenum ABC transporter ATP-binding protein
	F816_RS0109495	0.87943	1.73091e-18	5.27278e-16	DMSO reductase SoeC
	F816_RS0110695	0.855237	0.030903	0.114107	5S ribosomal RNA rrf
	F816_RS0104770	0.837181	0.00189863	0.013136	DUF2149 domain-containing protein
	F816_RS0102005	0.83095	1.61021e-05	0.000242995	sulfurtransferase
	F816_RS0101290	0.830565	0.0390676	0.137385	YIP1 family protein
	F816_RS0111405	0.80325	0.000238413	0.00242089	HlyD family secretion protein
	F816_RS0105790	0.797465	7.87489e-08	2.49235e-06	NADH-quinone oxidoreductase subunit NuoK
	F816_RS0105780	0.751755	3.04355e-12	2.85274e-10	NADH-quinone oxidoreductase subunit M
	F816_RS0105455	0.702305	6.16268e-05	0.000774147	DUF4212 domain-containing protein

## Sheet: Downregulated genes
	Locus tag	b-value	P-value	q-value	Protein product
		(0.1mM/0mM As(III))
	F816_RS0108370	-1.04177	2.48957e-49	2.02236e-46	copper oxidase
	F816_RS0107880	-1.38047	1.39476e-11	1.01374e-09	hypothetical protein
	F816_RS0110710	-1.25175	0.0242009	0.0949721	tRNA-Ile
	F816_RS0104675	-1.12233	2.96171e-15	5.1555e-13	DUF4399 domain-containing protein
	F816_RS0109675	-1.01328	0.00114116	0.00877291	hydrogenase maturation protease
	F816_RS0102675	-0.949204	1.51205e-11	1.02357e-09	cytochrome c
	F816_RS0108375	-0.858427	2.68519e-12	2.61752e-10	TolC family protein
	F816_RS0110785	-0.832366	0.0341462	0.123647	thiamine phosphate synthase
	F816_RS0112215	-0.786335	0.00129396	0.0095557	HPr-rel-A system PqqD family peptide chaperone
	F816_RS0102670	-0.785735	2.51508e-07	6.96504e-06	hypothetical protein
	F816_RS0109660	-0.784932	1.26317e-07	3.84793e-06	Ni/Fe hydrogenase subunit alpha
	F816_RS0105605	-0.735007	6.49841e-12	5.65594e-10	hypothetical protein
	F816_RS0108365	-0.727099	1.52708e-16	4.13499e-14	hypothetical protein
	F816_RS0104300	-0.726745	0.0414337	0.142619	tRNA-Lys
	F816_RS0112535	-0.726504	7.52407e-16	1.66692e-13	hypothetical protein
	F816_RS0112980	-0.701104	6.8507e-07	1.6053e-05	tRNA-Thr
