# Supplementary material for: Transcriptomic Analysis of Two Thioalkalivibrio Species Under Arsenite Stress Revealed a Potential Candidate Gene for an Alternative Arsenite Oxidation Pathway
Source: Front Microbiol. 2019 Jul 4;10:1514. doi: 10.3389/fmicb.2019.01514 (PMC6620896; doi:10.3389/fmicb.2019.01514)
Supplement: Supplementary file 10 [file Table_9.xlsx]

## Sheet: Tabelle1
Gene group	Gene names	Tv. thiocyanoxidans ARh2(T)					Tv. jannaschii ALM2(T)
		Locus tag	ARh2 0.1 mM				Locus tag	ALM2 0.1 mM				ALM2 5mM
			Sleuth		CLC			Sleuth		CLC		Sleuth		CLC
			b-value	P-value	log2 FC	P-value		b-value	P-value	log2 FC	P-value	b-value	P-value	log2 FC	P-value
Phosphate transporter	phoU	G372_RS0113265	-0.0729563	0.675038	-0.111921	0.631233	F816_RS0102525	-0.287389	0.305596	0.0621821	0.789052	1.04417	8.08459e-07	1.60052	1.11022e-16
	pstB	G372_RS0113270	0.403322	0.180879	0.481384	0.283213	F816_RS0102520	-0.204922	0.50691	-0.292473	0.154747	0.904289	0.000186253	1.16552	2.83191e-10
	pstA	G372_RS0113275	0.361782	0.170547	0.347564	0.338867	F816_RS0102515	0.847895	0.0862912	0.0024551	0.991295	1.46581	0.00125938	1.29285	4.58477e-10
	pstC	G372_RS0113280	-0.0101893	0.942284	-0.0420727	0.87965	F816_RS0102510	0.0872249	0.817168	0.289243	0.139005	1.26365	1.5206e-05	1.12132	7.55429e-11
	pstS	G372_RS0113285	0.274133	0.278501	0.393862	0.197334	F816_RS0102505	0.136669	0.74401	-0.221241	0.313929	1.12647	0.00121864	0.988543	3.65521e-07
	PiT	G372_RS0108350	-0.0613105	0.476436	-0.108578	0.511101	F816_RS0109805	0.0328647	0.672993	0.0647415	0.0647415	-0.0345436	0.700489	0.0871586	0.432441
	Porin	G372_RS0110450	0.390088	0.0181376	0.610856	0.00486301	F816_RS0109535	NA	NA	-1.97872	0.068363	NA	NA	-1.90499	0.0819345
Arsenic resistance	arxR						F816_RS0102015	NA	NA	2.27633	0.0924618	NA	NA	1.58874	0.261583
	arxS						F816_RS0102020	NA	NA	-0.170677	0.825676	NA	NA	-0.841868	0.356996
	arxX						F816_RS0102025	NA	NA	0.685767	0.329016	NA	NA	-0.103987	0.90312
	arxB2						F816_RS0102030	NA	NA	0.509099	0.612706	NA	NA	1.53181	0.0913417
	arxA						F816_RS0102035	NA	NA	0.368208	0.45251	NA	NA	-0.161055	0.750107
	arxB						F816_RS0102040	NA	NA	1.52677	0.282955	NA	NA	0.710043	0.646783
	arxC						F816_RS13975	NA	NA	0.354044	0.772727	NA	NA	1.09293	0.332247
	arxD						F816_RS14190	NA	NA	-3.61391	0.128468	NA	NA	-1.75092	0.213963
	arxE						F816_RS0102055	NA	NA	-1.9238	0.457937	NA	NA	-1.92466	0.465352
	HE						F816_RS0102060	NA	NA	1.83239	0.502902	NA	NA	NA	NA
	uspA						F816_RS0102065	1.5257	0.0207474	0.833673	0.00380155	2.36927	0.000319805	3.03499	0
	Hp1						F816_RS0102070	NA	NA	1.32163	0.00520463	NA	NA	2.75475	3.29876e-10
	ACR3	G372_RS0103830	0.00442743	0.965892	0.00213758	0.989876	F816_RS0102075	0.300645	0.180581	0.54163	0.00505602	1.57993	1.26869e-14	1.95765	0
	Hp2						F816_RS0102080	NA	NA	0.542454	0.00122265	NA	NA	1.59866	0
	arsR						F816_RS0102085	NA	NA	0.390559	0.0500736	NA	NA	0.363489	0.0841693
	arsC	G372_RS0108745	-0.00170701	0.988235	0.115946	0.465456	F816_RS0103725	0.20404	0.0232381	0.197786	0.146669	0.232445	0.0683149	0.137299	0.433973
	NQD	G372_RS0108740	-0.0805802	0.474642	-0.0988083	0.582223	F816_RS0103730	0.105292	0.205987	0.21001	0.0934134	-0.123678	0.216426	-0.0442425	0.729181
	MP	G372_RS0108735	0.167476	0.241045	0.215665	0.310663	F816_RS0103735	-8.46057e-05	0.999449	0.113492	0.494029	0.132526	-0.192826	-0.113969	0.524306
vitamin B12 production	btuB	G372_RS0108020	0.842408	2.35666e-19	1.23066	2.74829e-07	F816_RS0104790	NA	NA	0.381146	0.0192713	NA	NA	1.59978	0
	cobA	G372_RS13555	1.036	3.42924e-22	1.52346	3.43059e-14	F816_RS0104785	NA	NA	0.628146	7.1784e-09	NA	NA	1.48133	0
	cobN	G372_RS0108030	1.85095	2.21347e-97	2.66251	0	F816_RS0104780	0.102083	0.387255	-0.00209031	0.984884	1.16314	3.60611e-15	1.45038	0
	exbB	G372_RS0108035	1.8387	7.14734e-16	2.53296	0	F816_RS0104775	NA	NA	0.00408876	0.991087	NA	NA	1.77644	9.4369e-14
	Duf2149	G372_RS0108040	1.62071	1.0669e-09	2.61277	1.59883e-12	F816_RS0104770	0.182193	0.554882	0.0134136	0.956722	0.837181	0.00189863	0.821082	0.00129013
	btuF						F816_RS0104765	NA	NA	0.354106	0.772683	NA	NA	-2.72179	0.278321
	cobA-cobO	G372_RS0108045	1.56405	2.77882e-35	2.31523	0	F816_RS0104760	-0.0605798	0.68883	0.0133066	0.926546	1.09271	2.55025e-15	1.74615	0
	cobB	G372_RS0108050	1.35549	5.07723e-13	1.88105	0	F816_RS0104755	NA	NA	-0.0183588	0.91746	NA	NA	1.3376	1.43552e-13
	cobA	G372_RS0108055	1.63419	1.69479e-10	2.26215	0	F816_RS0104750	NA	NA	-0.519685	0.0523358	NA	NA	0.958391	0.000111654
	cobF	G372_RS0108060	1.37417	3.13645e-19	2.04992	0	F816_RS0104745	NA	NA	0.395178	0.107143	NA	NA	1.82666	1.11022e-16
	btuD	G372_RS0108065	1.36447	1.01308e-13	2.01758	0	F816_RS0104740	NA	NA	0.43664	0.114918	NA	NA	1.47878	5.52549e-09
	btuC	G372_RS0108070	1.4269	9.54359e-11	2.27775	4.18554e-14	F816_RS0104735	NA	NA	-0.900606	0.0961777	NA	NA	1.23674	0.00259466
	cobG	G372_RS0108075	1.61225	3.7696e-13	2.35072	0	F816_RS0104730	NA	NA	-0.482104	0.504633	NA	NA	-1.33502	0.114636
	cobH	G372_RS0108080	1.45363	3.57706e-15	NA	NA	F816_RS0104725	NA	NA	NA	NA	NA	NA	NA	NA
	cobI	G372_RS0108085	1.21832	3.50626e-25	1.77701	0	F816_RS0104720	NA	NA	-0.574737	0.312376	NA	NA	0.506982	0.259594
	cobJ	G372_RS0108090	0.809903	4.08061e-10	1.21996	2.80103e-09	F816_RS0104715	NA	NA	0.100842	0.554175	NA	NA	1.53037	0
	cobK	G372_RS0108095	0.702135	0.000117214	0.984443	2.55661e-05	F816_RS0104710	NA	NA	0.145236	0.500919	NA	NA	0.938656	5.935e-06
	cobL	G372_RS0108100	1.50848	3.3592e-11	2.20023	0	F816_RS0104705	NA	NA	-0.290419	0.176503	NA	NA	1.14465	1.06362e-10
	cobE	G372_RS0108105	1.25465	0.00447939	1.69462	0.000192181	F816_RS0104700	NA	NA	0.5015	0.436105	NA	NA	1.66891	0.00485086
	cobM	G372_RS0108110	1.34953	1.19782e-18	1.8153	3.33067e-16	F816_RS0104695	-0.245315	0.261691	-0.0941824	0.605312	0.504646	0.00732839	0.93479	7.33908e-09
	Hyp	G372_RS0112010	-0.0785786	0.381453	-0.103823	0.519743	F816_RS0101365	0.0912719	0.251116	0.0605778	0.610758	0.130326	0.108845	0.0899426	0.519805
	Hyp	G372_RS0112015	0.303603	0.134053	0.684988	0.00798776	F816_RS0101360	-0.21947	0.321403	-0.0918572	0.66707	0.417789	0.0301833	0.38845	0.0470895
	btuD	G372_RS0112020	0.0884849	0.689276	0.202733	0.375732	F816_RS0101355	-0.0217145	0.87423	-0.000978563	0.995489	0.279805	0.0357101	0.459221	0.00591138
	btuC	G372_RS0112025	-0.0882824	0.594474	-0.115838	0.62789	F816_RS0101350	-0.364356	0.0204929	-0.424923	0.0410918	0.0793213	0.579319	0.107332	0.556212
	btuF	G372_RS0112030	-0.18569	0.220453	-0.29598	0.132309	F816_RS0101345	0.0140147	0.886445	0.0154118	0.90198	-0.0640865	0.601405	-0.0409622	0.79752
	cobR	G372_RS0112035	0.135894	0.604267	0.565038	0.00940825	F816_RS0101340	0.0236779	0.850963	-0.0203411	0.887998	-0.00238424	0.988929	0.167565	0.344256
	cobD	G372_RS0112040	0.781681	2.33678e-07	1.0894	2.58704e-08	F816_RS0101335	-0.0472821	0.748096	-0.241177	0.0792313	0.272945	0.0529293	-0.0138807	0.91863
	cobC	G372_RS0112045	0.767543	3.54824e-10	1.06103	2.18104e-10	F816_RS0101330	0.144326	0.297904	0.0323391	0.826217	0.298007	0.0317275	0.365927	0.0112586
	cobQ	G372_RS0112050	0.99679	4.60011e-17	1.39628	2.54241e-14	F816_RS0101325	0.12906	0.177599	0.0576911	0.62973	0.620212	1.30706e-11	0.649454	2.97664e-08
	cobU	G372_RS0112055	0.9247	4.72458e-08	1.31113	6.79402e-09	F816_RS0101320	-0.0993698	0.627176	0.0212751	0.921033	0.316979	0.123288	0.309304	0.0994604
	cobT	G372_RS0112060	1.06141	3.12821e-23	1.55046	2.08722e-14	F816_RS0101315	-0.0807069	0.677307	0.0577131	0.7272	0.537233	0.0032601	0.690145	1.20233e-05
	cobC2	G372_RS0112065	0.710675	5.63151e-08	1.06507	3.31395e-08	F816_RS14260	-0.00485071	0.988203	0.461471	0.454772	-0.0342011	0.921474	0.0206948	0.973847
	cobS	G372_RS0112070	0.749958	1.0354e-15	1.147	2.34868e-09	F816_RS0101300	-0.154273	0.489883	-0.15468	0.371754	0.323742	0.151538	0.411636	0.0215206
	Hyp						F816_RS0101290	NA	NA	-0.973901	0.0266084	0.830565	0.0390676	0.999322	0.00219691
	cobG	G372_RS0112075	0.6607	1.46716e-07	1.20768	1.67302e-10
	Hyp	G372_RS0112080	0.902937	1.75922e-19	1.27359	3.04845e-12
Hsp20, Hsp60 & Hsp70	grpE	G372_RS0100810	0.703379	6.07295e-08	1.02564	2.53239e-08	F816_RS0110515	0.158378	0.469475	0.189477	0.288437	0.286401	0.322211	0.449104	0.0371605
	dnaK	G372_RS0100815	1.07017	3.30325e-07	1.48931	1.53893e-05	F816_RS0110510	0.0294916	0.902784	-0.0407107	0.846578	0.498473	0.116446	0.741423	0.00381084
	dnaJ	G372_RS0100820	0.564667	4.4328e-10	0.787602	4.21661e-07	F816_RS0110505	-0.103559	0.730156	-0.278538	0.191468	0.225309	0.412054	0.514314	0.0350765
	groEL	G372_RS0101945	0.6781	0.0359189	0.852715	0.0239919	F816_RS0111110	0.0806174	0.782991	0.00221466	0.99192	0.419339	0.215986	0.571645	0.0399662
	groES	G372_RS0101950	0.309696	0.273413	0.397092	0.110189	F816_RS0111115	0.125014	0.579367	0.120672	0.523986	0.348493	0.199799	0.492776	0.0163334
	Hsp20	G372_RS0111485	1.3354	1.27721e-06	1.73579	5.20362e-12
Sulfur oxidation	soxX	G372_RS0102100	1.18276	0.036899	1.31997	0.00138791	F816_RS0110620	-0.193089	0.00407097	-0.280498	0.0366468	-0.186734	0.258145	-0.19797	0.256866
	soxX	G372_RS0102105	1.62516	0.00264903	2.01163	1.61843e-06	F816_RS0110625	-0.0646036	0.433693	-0.076458	0.61315	-0.550069	0.0160081	-0.719764	0.000344677
	soxA	G372_RS0102110	1.70764	0.00248916	2.06855	1.36376e-06	F816_RS0110630	-0.0954508	0.251901	-0.128303	0.403045	-0.581724	0.00279153	-0.827166	2.38755e-05
	soxY	G372_RS0108445	1.34354	4.34839e-06	1.9391	2.88643e-08	F816_RS0110065	0.103894	0.254386	0.138888	0.368655	-0.0754592	0.709495	0.0306963	0.874064
	soxZ	G372_RS13565	1.35265	8.96561e-07	1.90436	5.92762e-08	F816_RS14125	-0.00432995	0.955663	0.0145357	0.919349	-0.090922	0.616083	-0.137388	0.458836
	soxB	G372_RS0104530	0.903424	1.01687e-09	1.32674	3.63056e-07	F816_RS0100430	-0.0501533	0.451025	-0.0829246	0.556316	-0.0314807	0.63314	-0.00376571	0.971165
	soxB	G372_RS0107420	-0.0608674	0.544371	-0.0963315	0.764347	F816_RS0104290	-0.00214896	0.976962	0.00226613	0.989007	-0.237456	0.000506306	-0.325216	0.0528675
	aprA	G372_RS0102900	1.45128	0.0463298	1.39665	0.00958006
	aprB	G372_RS0102905	1.14809	0.117505	0.957196	0.0527771
	sat	G372_RS0102915	-0.0346316	0.869217	-0.0996833	0.721219
	sat	G372_RS0100040	-0.0546013	0.521214	-0.129909	0.507639
	sorA	G372_RS0107700	-0.434193	0.389103	-0.956365	0.0126457	F816_RS0107855	-0.388172	0.00201138	-0.47813	0.00164476	-0.611126	2.06301e-11	-0.823424	2.43641e-07
	sorB	G372_RS0107705	0.0701804	0.798092	0.0942649	0.725707	F816_RS0107860	-0.249068	0.000331552	-0.308873	0.00959235	-0.546216	6.83956e-05	-0.70814	4.59914e-06
	soeA1	G372_RS0102930	-0.128483	0.440447	-0.232533	0.380826
	soeB1	G372_RS0102935	0.0375262	0.891194	-0.0348925	0.870695
	soeC1	G372_RS0102940	-0.0282424	0.90674	-0.0388477	0.860409
	soeC2	G372_RS0108330	1.56403	9.68414e-52	2.25291	2.47935e-12	F816_RS0109495	0.036928	0.613055	0.00901658	0.947817	0.87943	1.73091e-18	1.34216	0
	soeB2	G372_RS0108335	1.48744	4.15067e-35	2.1688	1.88018e-11	F816_RS0109500	-0.0115073	0.863178	0.0022376	0.986682	1.29776	3.17312e-41	1.92347	0
	soeA2	G372_RS0108340	1.0158	2.26632e-12	1.44102	1.0341e-06	F816_RS0109505	0.0357427	0.622949	0.0593151	0.712815	1.05661	1.34838e-51	1.56018	0
	dsrE/F like	G372_RS0107730	3.40871	2.28785e-10	4.39741	0	F816_RS0107880	-0.302949	0.0654594	-0.491742	0.000557546	-1.38047	1.39476e-11	-2.04233	0
		G372_RS0107725	1.10338	4.14351e-07	1.81625	7.56287e-10	F816_RS0107885	NA	NA	-0.497718	0.00179828	NA	NA	-1.85099	0
		G372_RS0111020	-1.80812	0.00834918	-3.13726	7.9603e-14	F816_RS0107140	NA	NA	-1.9238	0.457937	NA	NA	1.58893	0.261527
		G372_RS0107950	-1.43742	1.38963e-35	-2.073	0	F816_RS0112670	-0.0363421	0.671573	-0.0531248	0.631462	-0.0926481	0.345488	-0.156511	0.246815
		G372_RS0104960	0.336767	0.00116903	0.541516	0.0459321	F816_RS0105605	-0.151794	0.100636	-0.118629	0.408096	-0.735007	6.49841e-12	-0.975784	7.0208e-10
Growth, recombination, energy	nuoN	G372_RS0103045	0.776929	7.30827e-09	1.08854	8.92931e-11	F816_RS0105775	-0.201553	0.0909026	-0.252904	0.0353629	0.663617	1.11986e-15	1.00189	6.9611e-14
	nuoM	G372_RS0103050	0.799187	5.18404e-06	1.17077	1.61938e-10	F816_RS0105780	-0.234236	0.0449282	-0.348989	0.0129342	0.751755	3.04355e-12	1.1026	5.12923e-14
	nuoL	G372_RS0103055	0.60657	8.08644e-06	0.853686	0.000342016	F816_RS0105785	-0.232276	0.0299346	-0.305605	0.0501743	0.673532	1.04046e-18	0.98842	9.65894e-15
	nuoK	G372_RS0103060	0.713568	2.64957e-11	0.926263	7.78374e-06	F816_RS0105790	-0.00245092	0.97862	-0.0717497	0.600326	0.797465	7.87489e-08	1.24736	4.44089e-15
	nuoJ	G372_RS0103065	0.796571	4.10861e-20	1.1198	7.44689e-09	F816_RS0105795	-0.104117	0.233624	-0.154624	0.214585	0.42617	2.82286e-08	0.557775	6.61871e-05
	nuoI	G372_RS0103070	0.546044	1.32617e-05	0.826877	2.95787e-05	F816_RS0105800	-0.00780896	0.938247	-0.0288176	0.831691	0.445271	0.00010594	0.676735	1.42727e-05
	nuoH	G372_RS0103075	0.734849	3.39163e-17	1.03567	2.53545e-08	F816_RS0105805	-0.0597688	0.465657	-0.0400746	0.707597	0.505728	3.94425e-10	0.753473	5.44992e-07
	nuoG	G372_RS0103080	0.769079	1.27728e-15	1.07476	0.000255741	F816_RS0105810	0.036123	0.594516	0.0488947	0.633144	0.509464	1.10179e-14	0.73705	5.0504e-13
	nuoF	G372_RS0103085	0.706948	1.00227e-11	0.964192	3.83551e-05	F816_RS0105815	0.0256066	0.704219	0.0440747	0.66862	0.457848	3.36725e-12	0.682256	2.82294e-11
	nuoE	G372_RS0103090	0.706515	6.93354e-11	1.00699	4.57298e-10	F816_RS0105820	-0.00279963	0.974536	0.0332428	0.785934	0.486426	1.25942e-08	0.757275	3.8769e-13
	nuoD	G372_RS0103095	0.431149	0.0131443	0.581596	0.0210925	F816_RS0105825	0.0114797	0.866327	-0.018235	0.858418	0.418072	2.12026e-10	0.606025	1.32698e-05
	nuoC	G372_RS0103100	0.226033	0.0421771	0.31265	0.0874951	F816_RS0105830	0.0764548	0.267367	0.127771	0.236557	0.33689	7.00897e-07	0.521852	1.14611e-06
	nuoB	G372_RS0103105	0.126617	0.147202	0.15083	0.434109	F816_RS0105835	0.0654356	0.457687	0.0976436	0.37466	0.133923	0.149652	0.205428	0.142894
	nuoA	G372_RS0103110	-0.16643	0.413209	-0.222939	0.324706	F816_RS0105840	0.0449866	0.85201	0.039648	0.843066	0.165159	0.342185	0.222327	0.20365
	cytochrome c	G372_RS0104115	1.59622	3.29254e-12	2.31668	0	F816_RS0109095	0.00875529	0.943447	0.0108837	0.943302	0.0542931	0.666995	-0.0698295	0.657201
	Na+/H+ antiporter subunit G	G372_RS0107835	0.753355	1.04651e-08	1.00976	6.11673e-07	F816_RS0104975	0.0793481	0.444167	0.131693	0.325133	0.253444	0.0814126	0.435188	0.000976154
	tranposase + integrases	G372_RS0102685	-2.04882	8.10765e-65	-2.96754	0
		G372_RS0106250	-1.03907	2.01534e-13	-1.44764	2.01894e-12
		G372_RS0106255	-0.795286	5.74571e-19	-1.17427	1.90573e-10
		G372_RS0106410	-1.67572	1.39005e-49	-2.45534	0
		G372_RS0106495	-1.33906	1.36898e-25	-2.12982	0
							F816_RS0109555	-0.875586	0.019587	NA	NA	0.274096	0.33483	NA	NA
							F816_RS0106430	NA	NA	-0.354983	0.642826	NA	NA	-2.68915	0.04249
							F816_RS0112500	NA	NA	-0.809157	0.311421	NA	NA	-1.90445	0.0727313
